# Supplementary material for: Design principles of autocatalytic cycles constrain enzyme kinetics and force low substrate saturation at flux branch points
Source: eLife. 2017 Feb 7;6:e20667. doi: 10.7554/eLife.20667 (PMC5333975; doi:10.7554/eLife.20667)
Supplement: Supplementary file 1. — The ‘contents’ sheet includes the description of the different tables and is provided here as well: Fluxes source: The metabolic fluxes sheet from Data S1 in Gerosa et al. (2016). Cell size source: The cell sizes used for calculations as taken from Supplementary tables, Table ‘Content and abbreviations’ in Schmidt et al. (2016). Protein abundance: Protein abundance data from Supplementary tables, Table S6 in Schmidt et al. (2016). Reaction-Protein mapping: Mapping between reactions and genes of catalyzing enzymes. lux per enzyme: Calculation of the flux per enzyme for all the reactions listed in the ‘Reaction-Protein mapping’ table. Reaction Saturation: Estimated saturation of enzymes across conditions. Non autocatalytic cycles reaction saturation: Comparison of saturation levels of branch versus cycle reactions for non-autocatalytic cycles. Allosteric regulation: Listing allosteric interactions between autocatalytic components. DOI: http://dx.doi.org/10.7554/eLife.20667.011 [file elife-20667-supp1.xlsx]

## Sheet: Contents
Supplementary information to 'Design principles of autocatalytic cycles constrain enzyme kinetics and force over-expression at flux branch points'
Uri Barenholz, Dan Davidi, Ed Reznik, Yinon Bar-On, Niv Antonovsky, Elad Noor, and Ron Milo
Sheet name	Content	source (if relevant)	comments
Fluxes source	Metabolic fluxes sheet from Data S1, Gerosa et. al. , Cell Systems 2015	http://www.cell.com/action/showImagesData?pii=S2405-4712%2815%2900146-5
Cell size source	Cell size for different carbon sources from Supplementary tables, Table 'Content and abbrevations', Schmidt et. al., Nature Biotechnology 2016	http://www.nature.com/nbt/journal/v34/n1/full/nbt.3418.html#supplementary-information	Removed lines referring to irrelevant strains to simplify data extraction
Protein abundance	Protein abundance data from Supplementary tables, Table S6, Schmidt et. al. , Nature Biotechnology 2016	http://www.nature.com/nbt/journal/v34/n1/full/nbt.3418.html#supplementary-information	Removed irrelevant data on protein mass to reduce table size
Reaction-Protein mapping	Mapping between reaction identifiers from 'Fluxes source' sheet and protein identifiers from 'Protein abundance' sheet for identified branch points.
Flux per enzyme	The flux per enzyme for all the reactions listed in the Reaction-Protein mapping table across the carbon sources measured in the Fluxes source table.		1. A conversion factor is used to convert fluxes to units of reactions/(fl*sec) 2. A column with the maximal flux per enzyme is calculated to be used in saturation calculations
Reaction saturation	Estimated saturation of enzymes across conditions obtained by dividing each row in the 'Flux per enzyme' table by the maximal value across that row.		Calculating saturation level where multiple reactions branch out of a single metabolite is done by dividing the sum of fluxes through the branch reactions by the sum of the catalytic capacities of the two reactions under the relevant condition.
Allosteric regulation	Allosteric interactions between assimilated, intermediate, and branch product metabolites and the cycle and branch reactions	Manually curated from Ecocyc and Brenda
Non autocatalytic cycles reaction saturation	Comparison of saturation of branch versus cycle reactions for non autocatalytic cycles

## Sheet: Fluxes source
	Flux (mmol * gCDW-1 * h-1)									Standard Deviation										Flux Module Name	Flux Module Name (short)	Rnx-Flux relationship
Flux	Acetate	Fructose	Galactose	Glucose	Glycerol	Gluconate	Pyruvate	Succinate		Acetate	Fructose	Galactose	Glucose	Glycerol	Gluconate	Pyruvate	Succinate		1	Acetate uptake/secretion	Ace_Ex	( ACt2r , ACKr , PTAr ) + ACS
Ace_Ex	13.584	-3.32866	-1.96894e-08	-6.82702	-0.597	-5.00398	-11.9139	-3.32097		0.325537	0.0587775	0	1.02891	0.200187	0.157557	0.530502	0.308676		2	Frucoste uptake (PTS)	Fru_Ex	( FRUpts , FRUK )
Fru_Ex	0	8.328	0	0	0	0	0	0		0	0.278784	0	0	0	0	0	0		3	Galactose uptake	Gal_Ex	( GALabc , GALKr , UGLT , PGMT )
Gal_Ex	0	0	1.969	0	0	0	0	0		0	0	0.01324	0	0	0	0	0		4	Glucose uptake (PTS)	Glc_Ex	( GLCpts )
Glc_Ex	0	0	0	9.654	0	0	0	0		0	0	0	0.0380303	0	0	0	0		5	Glycerol uptake	Gly_Ex	( GlycUpt , GLYK , G3PD5 )
Gly_Ex	0	0	0	0	4.94483	0	0	0		0	0	0	0	0.145859	0	0	0		6	Gluconate uptake	Gln_Ex	( GlcnUpt , GNK )
Gln_Ex	0	0	0	0	0	7.28392	0	0		0	0	0	0	0	0.0335988	0	0		7	Pyruvate uptake	Pyr_Ex	( PYRt2r )
Pyr_Ex	0	0	0	0	0	0	26.714	0		0	0	0	0	0	0	0.798187	0		8	Succinate uptake	Suc_Ex	( SUCCt )
Suc_Ex	0	0	0	0	0	0	0	15.902		0	0	0	0	0	0	0	0.305668		9	Fumarate secretion	Fum_Ex	(FUM_SEC)
Fum_Ex	1.35843e-07	8.32745e-08	1.96895e-08	9.65373e-08	1.01357e-07	7.28368e-08	0	1.14		0	0	0	0	0	0	0	0.069		10	Lactate secretion	Lac_Ex	(LDH_D, D_LACt2)
Lac_Ex	0	0	0	0	0	0	1.15701	0		0	0	0	0	0	0	0.069	0		11	PGI flux	PGI	( PGI )
PGI	-3.42326	-6.19793	1.36849	5.69997	-3.4494	-0.0313209	-0.898173	-5.59032		0.566678	0.372637	0.0399656	0.310959	0.162359	4.41578e-13	0.0667253	0.544487		12	PFK-FBP flux	PFK-FBP	(PFK - FBP)
PFK-FBP	-1.88624	-2.461	1.54745	7.05848	-1.5	0.486919	-0.587012	-2.6916		0.300608	0.124212	0.0139591	0.141683	0.0830561	0.0328108	0.0222418	0.299556		13	FBA flux	FBA	( FBA)
FBA	-1.88624	5.867	1.54745	7.05848	-1.4957	0.486919	-0.587012	-2.6916		0.118076	0.0458932	0.00642187	0.0524753	0.0405188	0.0157713	0.00863662	0.11417		14	TPI flux	TPI	( TPI )
TPI	-1.88624	5.867	1.54745	7.05848	8.6403	0.486919	-0.587012	-2.6916		0.300608	0.124212	0.0139591	0.141683	0.0830561	0.0328108	0.0222418	0.299556		15	Middle EMP	Middle_EMP	(GAPD, PGK)
Middle_EMP	-2.26387	13.4646	3.30852	15.7104	8.01288	6.89459	-1.12931	-3.41515		0.300608	0.124212	0.0139591	0.141683	0.0830561	0.0328108	0.0222418	0.299556		16	Lower EMP	Low_EMP	(PGM , ENO)
Low_EMP	-2.73659	12.5985	3.04153	14.5577	7.25876	5.87338	-1.78914	-4.27385		0.300608	0.124212	0.0139591	0.141683	0.0830561	0.0328108	0.0222418	0.299556		17	PYK-PPS flux	PYK-PPS	( PYK - PPS )
PYK-PPS	-1.6532	0.669037	3.35734	2.48731	5.50726	3.46459	-3.45038	-3.73004		1.31095	0.469279	0.0315771	0.141683	0.0830561	0.0328108	0.247131	3.51828		18	PDH flux	PDH	( PDH )
PDH	0.0654627	9.06883	2.9427	11.2985	4.09774	7.50554	21.0174	7.75208		0.166444	0.121546	0.0332555	0.0905949	0.0515772	0.0164054	0.110109	0.0405223		19	ED flux	ED	( EDD , EDA )
ED	0.821594	8.32807e-10	0.172972	1.08699	0.0145804	5.81896	2.67142e-09	0.655464		0.204691	3.90612e-14	0.0154834	0.0799114	0	0.0492161	4.28316e-14	0.244421		20	PPP/ED branch	PPP_ED_branch	( ZWF , PGL )
PPP_ED_branch	3.40831	6.17128	0.591654	3.91928	3.42609	0	0.876802	5.56329		0.492579	0.372637	0.0497791	0.283289	0.0717482	0.0696021	0.0667253	0.529023		21	Early PPP	Early_PPP	(GND)
Early_PPP	2.58672	6.17128	0.418682	2.83228	3.41151	1.46496	0.876802	4.90782		0.448036	0.372637	0.0473099	0.271785	0.154732	0.0492161	0.0667253	0.469173		22	RPI flux	RPI	(RPI)
RPI	1.02932	2.39854	0.227903	1.42744	1.42638	0.905204	0.538926	1.97412		0.149345	0.124212	0.01577	0.0905949	0.0515772	0.0164054	0.0222418	0.156391		23	RPE flux	RPE	(RPE)
RPE	1.5574	3.77274	0.190779	1.40485	1.98513	0.559759	0.337875	2.9337		0.149345	0.124212	0.01577	0.0905949	0.0515772	0.0164054	0.0222418	0.156391		24	Non-oxidative PPP	Non-ox_PPP	( TKT1 , TALA)
Non-ox_PPP	0.839147	1.98381	0.13221	0.820202	1.08075	0.388774	0.247744	1.56385		0.149345	0.124212	0.01577	0.0905949	0.0515772	0.0164054	0.0222418	0.156391		25	TKT2 flux	TKT2	( TKT2 )
TKT2	0.718249	1.78893	0.0585691	0.584644	0.90438	0.170985	0.0901313	1.36985		0.149345	0.124212	0.01577	0.0905949	0.0515772	0.0164054	0.0222418	0.156391		26	PPC flux	PPC	( PPC )
PPC	1.77415	3.54567	0.377386	2.45333	1.37647	1.94335	2.48945	2.01611		0.353857	0.115813	0.020587	0.120812	1.89327e-13	1.42194e-12	0.127891	0.0526629		27	PPCK flux	PPCK	( PPCK )
PPCK	3.11428	0.35892	0.848949	0.540874	-1.00352e-07	-7.21108e-08	1.1648	2.97179		1.20936	0.458596	0.0333501	0.120812	7.5943e-14	2.62853e-13	0.274103	3.48685		28	Early TCA	Early_TCA	( CS , ACONT , ACONT2 )
Early_TCA	8.83402	4.56833	1.52096	2.97797	2.46484	1.15403	8.08192	3.1554		0.149345	0.124212	0.01577	0.0905949	0.0515772	0.0164054	0.0222418	0.156391		29	ICDH flux	ICDH	( ICDHyr )
ICDH	4.69642	4.56612	0.496177	2.97797	2.46484	1.15403	7.97932	3.03895		0.336739	0.128246	0.0353755	0.0905949	0.0515772	0.0164054	0.101507	0.301355		30	Intermediate TCA	Int_TCA	( AKGDH , SUCOAS )
Int_TCA	4.26716	3.87489	0.236073	2.13807	1.84046	0.182358	7.41565	2.35198		0.336739	0.128246	0.0353755	0.0905949	0.0515772	0.0164054	0.101507	0.301355		31	SUCDH3 flux	SUCDH3	SUCDH3
SUCDH3	8.40476	3.87711	1.26086	2.13807	1.84046	0.182358	7.51826	18.3704		0.149345	0.124212	0.01577	0.0905949	0.0515772	0.0164054	0.0222418	0.156391		32	FUM flux	FUM	FUM
FUM	8.40476	3.87711	1.26086	2.13807	1.84046	0.182358	7.51826	17.2304		0.149345	0.124212	0.01577	0.0905949	0.0515772	0.0164054	0.0222418	0.156391		33	MDH and MQO flux	MDH+MQO	( MDH + MQO )
MDH+MQO	10.6713	2.22771	2.28512	2.13807	1.84046	0.182358	7.4278	4.9507		1.20209	0.469279	0.033161	0.0905949	0.0515772	0.0164054	0.247131	3.47538		34	Malic Enzyme	ME	( ME1 + ME2)
ME	1.87104	1.65161	0.000523765	-9.55724e-08	-1.00346e-07	-7.21058e-08	0.193061	12.3962		1.18554	0.462466	0.00328044	9.80818e-14	5.46562e-14	6.42915e-13	0.249612	3.47254		35	Glyoxylate Cycle	Glx_Cycle	( ICL , MALS )
Glx_Cycle	4.1376	0.00221044	1.02479	9.65404e-10	1.01361e-09	7.284e-08	0.102601	0.116452		0.219646	0.0134715	0.0304957	2.77288e-14	3.16415e-14	1.76844e-13	0.103534	0.147548		36	Growth_rate	Growth_rate
Growth_rate	0.29	0.4924	0.18	0.65	0.49	0.59	0.39	0.51		0.013	0.01	0.01	0.01	0.008	0.025	0.01	0.01

## Sheet: Cell size source
Growth condition	Strain	Growth rate (h-1)	Stdev	Single cell volume [fl]1
LB	BW25113	1.9	0.03	4.29
Glycerol + AA	BW25113	1.27	0.01	3.83
Acetate	BW25113	0.3	0.04	2.3
Fumarate	BW25113	0.42	0.02	2.54
Galactose	BW25113	0.26	0.003	2.21
Glucose	BW25113	0.58	0.01	2.84
Glucosamine	BW25113	0.46	0.02	2.62
Glycerol	BW25113	0.47	0.01	2.64
Pyruvate	BW25113	0.4	0.01	2.5
Succinate	BW25113	0.44	0.003	2.58
Fructose	BW25113	0.65	0.004	2.96
Mannose	BW25113	0.47	0.01	2.64
Xylose	BW25113	0.55	0.01	2.79
Osmotic-stress glucose3	BW25113	0.55	0.01	2.79
42°C glucose	BW25113	0.66	0.02	2.98
pH6 glucose	BW25113	0.63	0.005	2.93
Stationary phase 1 day	BW25113	-0.01	0.003	1.6
Stationary phase 3 days	BW25113	-0.01	0.003	1.6
chemostat µ=0.12	BW25113	0.12	0	1.9
chemostat µ=0.20	BW25113	0.2	0	2.08
chemostat µ=0.35	BW25113	0.35	0	2.4
chemostat µ=0.5	BW25113	0.5	0	2.69

## Sheet: Protein abundance
Final table with combined global absolute abundance estimations from both datasets including functional annotations using cluster of orthologues groups (COG)
Protein abundance data from Supplementary tables, Table S6, Schmidt et. al. , nature biotechnology 2016							Protein copies/cell
Uniprot Accession	Description	Gene	Peptides used for quantitation	Confidence score	Molecular weight (Da)	Dataset	Glucose	LB	Glycerol + AA	Acetate	Fumarate	Glucosamine	Glycerol	Pyruvate	Chemostat µ=0.5	Chemostat µ=0.35	Chemostat µ=0.20	Chemostat µ=0.12	Stationary phase 1 day	Stationary phase 3 days	Osmotic-stress glucose	42°C glucose	pH6 glucose	Xylose	Mannose	Galactose	Succinate	Fructose
P0A8T7	DNA-directed RNA polymerase subunit beta' OS=Escherichia coli (strain K12) GN=rpoC PE=1 SV=1	rpoC	91	6045.53	155045	2	2779	7164	4503	2180	2444	3316	2845	2730	4780	3900	3477	3000	1735	1907	2248	3985	3339	3632	3401	2258	2764	4517
P0A8V2	DNA-directed RNA polymerase subunit beta OS=Escherichia coli (strain K12) GN=rpoB PE=1 SV=1	rpoB	89	5061.29	150520	2	3957	8888	5199	2661	3199	3999	3749	3714	5245	4388	3860	3455	2379	2227	3254	4923	4032	4437	4143	2820	3855	5269
P36683	Aconitate hydratase 2 OS=Escherichia coli (strain K12) GN=acnB PE=1 SV=3	acnB	67	4505.67	93420.9	2	7596	16600	17548	22844	19491	13753	10792	16395	15733	20261	16410	13763	933	756	2815	4842	4649	6697	16517	12875	19547	8782
P15254	Phosphoribosylformylglycinamidine synthase OS=Escherichia coli (strain K12) GN=purL PE=1 SV=3	purL	65	4277.71	141296	2	2456	821	2339	1438	2071	1959	2068	2708	2285	1730	1468	1219	618	735	1318	1885	1708	1721	1764	1570	1913	2406
P09831	Glutamate synthase [NADPH] large chain OS=Escherichia coli (strain K12) GN=gltB PE=1 SV=3	gltB	64	4111.74	163176	2	2859	604	652	1363	1281	1977	2204	1691	2321	1959	1771	1379	230	183	834	2979	2723	2496	2079	1398	1553	3858
P0AFG8	Pyruvate dehydrogenase E1 component OS=Escherichia coli (strain K12) GN=aceE PE=1 SV=2	aceE	59	3547.25	99587.9	2	5815	11820	6671	2445	4521	4198	4067	15791	5884	5275	4409	4794	5279	5888	6283	6983	9459	10243	4905	3263	4739	9414
P0A9Q7	Aldehyde-alcohol dehydrogenase OS=Escherichia coli (strain K12) GN=adhE PE=1 SV=2	adhE	58	4443.68	96048.6	2	4851	5472	5634	4510	4007	7361	5186	3292	10354	7637	7837	8009	7038	6714	5216	9029	9015	8391	5977	6324	4052	19994
P0CE47	Elongation factor Tu 1 OS=Escherichia coli (strain K12) GN=tufA PE=1 SV=1	tufA	57	4565.07	43238.3	2	252452	443852	368888	149278	190256	173736	191041	187233	180819	142247	112618	102131	86996	88447	214484	250232	192346	216764	192017	140285	195883	233116
P25665	5-methyltetrahydropteroyltriglutamate--homocysteine methyltransferase OS=Escherichia coli (strain K12) GN=metE PE=1 SV=6	metE	56	4067.16	84602.8	2	51584	1711	1690	17413	19719	23978	28808	18643	27208	13268	8295	4243	3382	3563	30109	32362	25744	32790	26643	11660	19185	38848
P0A6F5	60 kDa chaperonin OS=Escherichia coli (strain K12) GN=groL PE=1 SV=2	groL	55	3795.21	57274.7	2	22739	65887	57319	19540	26422	23090	26358	22919	25954	23702	17811	16980	26509	25774	22879	65428	26821	26428	27239	15632	26639	24906
P00968	Carbamoyl-phosphate synthase large chain OS=Escherichia coli (strain K12) GN=carB PE=1 SV=2	carB	55	3752.55	117749	2	4445	411	675	1514	2501	2228	2852	1847	3000	1873	1409	1117	1212	1147	2249	3595	2908	2687	2547	1675	2607	3695
P09373	Formate acetyltransferase 1 OS=Escherichia coli (strain K12) GN=pflB PE=1 SV=2	pflB	54	3972.86	85284.7	2	4615	6984	6457	5645	5440	6178	5863	6557	6684	6004	5454	4877	3557	3629	4737	5699	8209	5999	7028	5774	6640	7624
P0A6Y8	Chaperone protein dnaK OS=Escherichia coli (strain K12) GN=dnaK PE=1 SV=2	dnaK	53	4447.08	69054.5	2	18605	59770	38606	14174	16849	17438	17699	13239	15492	13264	10501	9606	34072	33716	20710	44985	34137	18457	18097	11030	19666	18740
P0A705	Translation initiation factor IF-2 OS=Escherichia coli (strain K12) GN=infB PE=1 SV=1	infB	52	3380.67	79678.1	2	3047	6788	4375	1912	2532	2677	2827	2659	3822	2910	2327	2029	1200	1411	2280	4009	2725	3062	2785	1832	2546	3534
P05793	Ketol-acid reductoisomerase OS=Escherichia coli (strain K12) GN=ilvC PE=1 SV=4	ilvC	52	2706.42	54016.3	2	33338	3422	2074	15604	19954	20988	29065	14079	26857	17840	11583	6798	18865	17213	41665	34023	19774	29345	23853	13576	24774	35790
P00864	Phosphoenolpyruvate carboxylase OS=Escherichia coli (strain K12) GN=ppc PE=1 SV=1	ppc	50	3589.35	98982.2	2	3633	1283	1488	1349	1452	3287	2185	1536	4288	2871	2129	1673	1316	1628	3019	3669	5644	3575	2647	1663	1479	5126
P00957	Alanyl-tRNA synthetase OS=Escherichia coli (strain K12) GN=alaS PE=1 SV=2	alaS	49	3631.87	95954.6	2	1948	3256	2475	1133	1510	1666	1710	1846	1726	1440	1193	1038	1085	1144	1714	2974	2251	2389	1778	1265	1821	2613
P0A6M8	Elongation factor G OS=Escherichia coli (strain K12) GN=fusA PE=1 SV=2	fusA	49	4276.28	77514.5	2	39027	86623	60762	21360	28956	31263	31225	28633	24574	19959	15430	12886	13324	12394	29539	35283	29860	34978	27365	20501	32672	38115
P00961	Glycyl-tRNA synthetase beta subunit OS=Escherichia coli (strain K12) GN=glyS PE=1 SV=4	glyS	47	3352.04	76747	2	2914	6498	4134	1959	2514	2533	2683	2693	2680	2170	1696	1621	1269	1533	2680	3642	2722	3304	2793	1981	2448	3272
P76558	NADP-dependent malic enzyme OS=Escherichia coli (strain K12) GN=maeB PE=1 SV=1	maeB	46	2485.6	82346.8	2	469	2473	1691	1504	1340	1312	1134	1257	2829	3030	2860	2794	523	576	546	779	543	969	1595	986	1455	1245
P0AG67	30S ribosomal protein S1 OS=Escherichia coli (strain K12) GN=rpsA PE=1 SV=1	rpsA	44	2834	61102.7	2	23797	64900	33541	10729	16986	16209	20402	14453	18244	12112	9970	8662	8912	8261	15327	24274	17616	20320	17384	11286	17888	25304
P07813	Leucyl-tRNA synthetase OS=Escherichia coli (strain K12) GN=leuS PE=1 SV=2	leuS	43	2357.38	97153.3	2	1846	2692	2379	1202	1491	1459	1505	1311	1622	1369	1191	1069	889	907	1339	2105	1784	1684	1371	1100	1472	1797
P00561	Bifunctional aspartokinase/homoserine dehydrogenase 1 OS=Escherichia coli (strain K12) GN=thrA PE=1 SV=2	thrA	42	3126.22	89045.8	2	5703	2160	1769	2108	3423	5215	4679	10181	7938	3275	2045	1464	2571	2798	6417	4512	5283	9303	4388	2073	3815	9641
P0AFG3	2-oxoglutarate dehydrogenase E1 component OS=Escherichia coli (strain K12) GN=sucA PE=1 SV=1	sucA	42	2817.04	104978	2	1706	6084	4467	4195	2635	3326	2752	4196	3640	2817	2323	2149	1246	1026	1781	1952	2400	3205	3022	1630	3418	3460
P00956	Isoleucyl-tRNA synthetase OS=Escherichia coli (strain K12) GN=ileS PE=1 SV=5	ileS	41	2164.51	104213	2	2166	2886	2350	1348	1657	1621	1814	1921	1647	1363	1074	884	927	959	2086	2950	2024	2454	1625	1357	1569	2021
P25553	Lactaldehyde dehydrogenase OS=Escherichia coli (strain K12) GN=aldA PE=1 SV=2	aldA	41	2623.32	52221.7	2	3501	11229	10885	17217	28815	17164	16408	27353	19056	31012	35721	36655	1866	1868	1805	1689	1864	5994	30561	28622	27057	9487
P10408	Protein translocase subunit secA OS=Escherichia coli (strain K12) GN=secA PE=1 SV=2	secA	40	2576.06	101941	2	706	1794	1114	451	665	737	622	790	935	836	757	750	326	342	442	666	552	660	709	442	617	771
P21889	Aspartyl-tRNA synthetase OS=Escherichia coli (strain K12) GN=aspS PE=1 SV=1	aspS	40	2303.66	65853.6	2	2272	4356	2530	1505	1690	1748	1837	1605	2331	1930	1517	1483	1254	1252	2006	1914	2532	2747	2029	1397	1967	2590
P07395	Phenylalanyl-tRNA synthetase beta chain OS=Escherichia coli (strain K12) GN=pheT PE=1 SV=2	pheT	40	2768.54	87305.4	2	5023	7699	6066	2818	3989	4413	4670	4724	6350	5645	5764	5152	1716	1901	3251	4815	4214	4320	4744	3868	4230	5932
P07118	Valyl-tRNA synthetase OS=Escherichia coli (strain K12) GN=valS PE=1 SV=2	valS	40	2513.25	108106	2	1719	3107	2137	828	1025	1040	1114	1044	1298	970	749	650	508	502	962	1911	1132	1387	1188	756	1052	1407
P23847	Periplasmic dipeptide transport protein OS=Escherichia coli (strain K12) GN=dppA PE=1 SV=1	dppA	40	2246.78	60237.2	2	4939	2476	15161	8170	13275	8661	9853	11652	10138	12011	10693	9324	4327	4713	7740	5160	6365	7698	10451	8002	11094	7462
P06959	Dihydrolipoyllysine-residue acetyltransferase component of pyruvate dehydrogenase complex OS=Escherichia coli (strain K12) GN=aceF PE=1 SV=3	aceF	40	2531.68	66036.8	2	9057	22341	10155	3567	6404	5696	5649	21930	7066	6302	5144	5610	7996	8856	10764	9534	13100	13628	6814	4888	6891	11238
P13029	Catalase-peroxidase OS=Escherichia coli (strain K12) GN=katG PE=1 SV=2	katG	38	2675.38	79956.1	2	2199	2215	1900	2683	3221	5526	3180	3661	3298	4104	4575	5007	485	435	1541	3729	2122	2182	3900	3944	3254	2927
P0AES4	DNA gyrase subunit A OS=Escherichia coli (strain K12) GN=gyrA PE=1 SV=1	gyrA	38	2233.08	96885.4	2	750	1873	1093	479	579	779	711	607	1157	848	734	636	401	388	506	855	671	712	726	405	637	896
P08200	Isocitrate dehydrogenase [NADP] OS=Escherichia coli (strain K12) GN=icd PE=1 SV=1	icd	38	2595.05	45709.5	2	33670	19445	34427	30054	29587	31728	24591	35445	30532	27433	22201	15274	13663	14036	37449	29759	28245	32222	33652	21773	28121	23699
P0ABB4	ATP synthase subunit beta OS=Escherichia coli (strain K12) GN=atpD PE=1 SV=2	atpD	38	2757.77	50275.8	2	24156	42417	48805	16016	23707	25159	26449	30533	24035	19994	14634	10875	7040	6955	13916	16817	13132	23770	24279	14507	25885	24016
P04825	Aminopeptidase N OS=Escherichia coli (strain K12) GN=pepN PE=1 SV=2	pepN	37	2372.98	98838.7	2	1296	2506	1944	1215	1442	1301	1418	1327	1358	1366	1287	1036	604	678	1056	1436	1364	1411	1429	978	1324	1472
P0AD61	Pyruvate kinase I OS=Escherichia coli (strain K12) GN=pykF PE=1 SV=1	pykF	36	2143.91	50679.2	2	8902	10333	9259	4455	4816	7011	7111	3406	7111	5143	4493	5255	6420	5873	5929	8994	9675	10167	6069	6137	4950	11825
P0A9G6	Isocitrate lyase OS=Escherichia coli (strain K12) GN=aceA PE=1 SV=1	aceA	36	2786.72	47473.6	2	28173	15283	25688	242737	139131	87949	74908	48723	109529	184169	200923	218132	19208	18695	43571	60986	23676	28038	138987	195985	121542	33323
P0AC33	Fumarate hydratase class I, aerobic OS=Escherichia coli (strain K12) GN=fumA PE=1 SV=2	fumA	36	2533.65	60242.6	2	1352	6237	5154	4783	4156	2807	2523	3289	4712	3725	2337	1543	179	178	778	649	1220	2149	4336	2088	4416	2749
P09546	Bifunctional protein putA OS=Escherichia coli (strain K12) GN=putA PE=1 SV=3	putA	36	2535.67	143707	2	128	1513	873	117	123	172	134	120	169	151	108	95	106	113	156	113	178	165	114	77	114	136
P21179	Catalase HPII OS=Escherichia coli (strain K12) GN=katE PE=1 SV=1	katE	35	2211.86	84092.4	2	1180	761	616	2061	2429	1822	1863	1150	1603	2315	2779	3141	607	602	1202	616	2033	884	1791	3328	2113	1121
P0A6Z3	Chaperone protein htpG OS=Escherichia coli (strain K12) GN=htpG PE=1 SV=1	htpG	35	1847.19	71360.3	2	2096	8121	4816	1330	1939	1951	1973	1554	1942	1679	1341	1130	1892	1958	1864	7184	2620	2253	1985	1162	2106	2069
P0A6P1	Elongation factor Ts OS=Escherichia coli (strain K12) GN=tsf PE=1 SV=2	tsf	35	2366.23	30385.8	2	19872	44439	36078	8017	12406	15725	15125	12702	10783	7679	6264	5277	11102	10314	21190	18115	21680	17206	11768	8289	12319	17724
P08839	Phosphoenolpyruvate-protein phosphotransferase OS=Escherichia coli (strain K12) GN=ptsI PE=1 SV=1	ptsI	35	2206.55	63503.9	2	10158	5193	4399	2651	3257	6470	4118	3075	6956	5090	4040	3375	3060	3538	5527	6983	6137	4769	5355	4457	3423	9261
P0A6E4	Argininosuccinate synthase OS=Escherichia coli (strain K12) GN=argG PE=1 SV=2	argG	35	2674.37	49848.8	2	8325	1035	1307	2393	3172	4082	4295	3341	4294	2491	2377	2240	2173	1914	4802	8242	6240	4874	3963	2880	3827	5915
P0A6F3	Glycerol kinase OS=Escherichia coli (strain K12) GN=glpK PE=1 SV=2	glpK	35	2432.72	56177.3	2	496	13194	24980	527	688	426	27858	612	849	1140	1081	1018	513	537	408	531	420	409	783	414	570	425
P0A9M8	Phosphate acetyltransferase OS=Escherichia coli (strain K12) GN=pta PE=1 SV=2	pta	34	2290.93	77105.9	2	1148	2679	1874	877	1094	1238	1053	3512	1519	1488	1389	1405	1199	1147	1187	1784	1837	1505	1144	909	1136	1461
P0A850	Trigger factor OS=Escherichia coli (strain K12) GN=tig PE=1 SV=1	tig	34	2152.85	48144.9	2	24929	56164	34934	11077	15332	15920	18285	14424	14812	12471	9580	7344	7596	6986	17052	19530	15756	21681	17976	11402	18740	21284
P0A940	Outer membrane protein assembly factor yaeT OS=Escherichia coli (strain K12) GN=yaeT PE=1 SV=1	bamA	34	2111.5	90478.5	2	2029	3023	2921	1167	1708	1794	1891	1962	1452	1349	1183	956	971	812	1942	1900	2178	1848	1687	1255	1562	1898
P05055	Polyribonucleotide nucleotidyltransferase OS=Escherichia coli (strain K12) GN=pnp PE=1 SV=3	pnp	34	2010.85	77035	2	3171	6269	4446	2343	3171	3473	3275	2931	4772	4076	3482	3169	1566	1457	1928	2642	2888	3331	3660	2234	3146	4051
P0A6T1	Glucose-6-phosphate isomerase OS=Escherichia coli (strain K12) GN=pgi PE=1 SV=1	pgi	34	2068.73	61473	2	4601	5809	7317	2918	3204	4260	4494	2572	3773	3049	2677	2443	2663	2656	3751	5862	6171	5591	3898	3461	3150	4632
P0AC41	Succinate dehydrogenase flavoprotein subunit OS=Escherichia coli (strain K12) GN=sdhA PE=1 SV=1	sdhA	34	2804.82	64363.1	2	2083	8367	6275	6360	4147	4507	3118	4984	6341	5840	5247	4903	696	713	1704	2402	1978	3181	4020	2734	4172	3371
P0A9M0	Lon protease OS=Escherichia coli (strain K12) GN=lon PE=1 SV=1	lon	33	2210.84	87364.8	2	1139	3411	1726	678	972	1121	1235	1182	1456	1159	877	743	741	826	985	1863	1406	1373	1401	869	1195	1585
P27550	Acetyl-coenzyme A synthetase OS=Escherichia coli (strain K12) GN=acs PE=1 SV=2	acs	33	1996.87	72030.2	2	995	2346	4067	6590	11943	7848	3967	5485	7312	14562	14431	14683	3624	4132	1130	1151	1090	1987	10100	9872	9177	2489
P23538	Phosphoenolpyruvate synthase OS=Escherichia coli (strain K12) GN=ppsA PE=1 SV=5	ppsA	33	1820.57	87361.6	2	1158	2394	2161	2609	3040	1574	1851	4184	1852	2098	1870	1824	1265	1229	1896	1681	2050	1246	1929	1761	3507	607
P04079	GMP synthase [glutamine-hydrolyzing] OS=Escherichia coli (strain K12) GN=guaA PE=1 SV=1	guaA	33	2391.7	58623.9	2	3870	3818	13840	1392	2089	2535	2318	1640	2373	1473	1107	808	1468	1448	2930	3305	3242	2675	1686	1295	2459	2993
P22523	Chromosome partition protein mukB OS=Escherichia coli (strain K12) GN=mukB PE=1 SV=2	mukB	33	2059.61	170108	2	199	463	260	152	175	235	199	212	293	268	266	239	48	44	155	302	210	279	260	165	208	319
P0A9W3	Uncharacterized ABC transporter ATP-binding protein YjjK OS=Escherichia coli (strain K12) GN=yjjK PE=1 SV=2	yjjK	32	2281.37	62386.3	2	2571	4583	4916	1597	2442	2461	2733	2259	2597	1817	1392	1344	1035	1074	1915	3375	1940	2402	2873	1837	2838	3079
P0AES6	DNA gyrase subunit B OS=Escherichia coli (strain K12) GN=gyrB PE=1 SV=2	gyrB	32	2076.1	89875.9	2	842	1700	1294	528	620	783	753	697	969	755	661	534	588	547	657	843	879	786	705	475	617	1004
P21513	Ribonuclease E OS=Escherichia coli (strain K12) GN=rne PE=1 SV=6	rne	32	2572.23	118107	2	848	1624	1296	565	717	998	751	665	1279	1119	939	864	535	655	699	1129	744	894	979	566	664	1111
P0A8M3	Threonyl-tRNA synthetase OS=Escherichia coli (strain K12) GN=thrS PE=1 SV=1	thrS	32	1942.28	73948.8	2	939	1935	1146	646	891	850	947	817	1368	1128	1032	1071	688	608	754	1506	988	1053	834	652	789	1118
P0A799	Phosphoglycerate kinase OS=Escherichia coli (strain K12) GN=pgk PE=1 SV=2	pgk	32	2518.51	41074.6	2	40039	57863	61210	29802	30847	30790	34333	28150	30930	26962	21336	21372	24266	23448	44601	38747	41230	40867	25203	29926	27811	46061
P00370	NADP-specific glutamate dehydrogenase OS=Escherichia coli (strain K12) GN=gdhA PE=1 SV=1	gdhA	32	1927.2	48532.4	2	6343	1137	2401	3650	3100	5056	4152	3776	8053	5862	4032	2559	637	680	4967	2509	5937	5418	4236	2406	3520	6184
P0A825	Serine hydroxymethyltransferase OS=Escherichia coli (strain K12) GN=glyA PE=1 SV=1	glyA	32	2089.47	45270	2	24510	10374	14714	9091	13951	16718	14060	15279	13257	9219	6871	5125	9175	8548	24969	19720	24215	21797	16057	12529	16588	21028
P23843	Periplasmic oligopeptide-binding protein OS=Escherichia coli (strain K12) GN=oppA PE=1 SV=2	oppA	32	1916.49	60842.9	2	5755	6684	30286	2957	5504	6786	4991	5510	6618	6163	5482	4274	7917	8660	14097	3358	6756	9196	5278	4291	6485	6056
P0A9A6	Cell division protein ftsZ OS=Escherichia coli (strain K12) GN=ftsZ PE=1 SV=1	ftsZ	32	2379.17	40280.6	2	6070	7898	7611	3181	3903	4423	4321	4167	3621	2976	2564	2224	1453	1599	5664	5243	5171	5988	4712	3098	4363	5163
P08997	Malate synthase A OS=Escherichia coli (strain K12) GN=aceB PE=1 SV=1	aceB	32	2238.64	60217.5	2	4393	2422	3345	20350	11574	10897	8308	4700	11474	15539	16882	15952	4146	3429	11216	15460	6073	5058	12726	16308	9008	4842
P33602	NADH-quinone oxidoreductase subunit G OS=Escherichia coli (strain K12) GN=nuoG PE=1 SV=4	nuoG	32	2198.98	100218	2	934	3781	2271	871	1391	1408	1467	1332	1510	1505	1275	1226	194	175	362	568	770	815	1469	905	1428	1477
P17846	Sulfite reductase [NADPH] hemoprotein beta-component OS=Escherichia coli (strain K12) GN=cysI PE=1 SV=4	cysI	31	1902.4	63939.9	2	3011	620	1641	1575	2033	2175	2553	1931	1971	1408	1055	980	233	211	890	1952	1542	1791	1849	1333	1748	2699
P00582	DNA polymerase I OS=Escherichia coli (strain K12) GN=polA PE=1 SV=1	polA	31	2183.47	103036	2	440	912	593	352	445	442	443	482	460	398	360	340	204	222	278	392	362	417	381	329	380	423
P0A9B2	Glyceraldehyde-3-phosphate dehydrogenase A OS=Escherichia coli (strain K12) GN=gapA PE=1 SV=2	gapA	31	1793.43	35492.2	2	47083	48645	47006	20252	22597	30079	32565	21072	33992	21446	15357	13174	16914	17821	25284	51517	39132	39747	27169	16649	24432	62762
P15639	Bifunctional purine biosynthesis protein purH OS=Escherichia coli (strain K12) GN=purH PE=1 SV=1	purH	31	1871.94	57275	2	2728	891	2708	1138	2134	2129	2376	2584	2258	1276	1010	832	1415	1226	2365	3268	2956	2502	1864	1366	2185	2814
P0A853	Tryptophanase OS=Escherichia coli (strain K12) GN=tnaA PE=1 SV=1	tnaA	31	1872.16	52721.6	2	613	44379	77262	2409	1660	1103	1045	886	2164	3073	3055	3743	451	362	514	761	584	652	1655	1392	1726	700
P25516	Aconitate hydratase 1 OS=Escherichia coli (strain K12) GN=acnA PE=1 SV=3	acnA	31	2147.6	97597.7	2	595	975	785	1601	1333	1525	808	785	980	1298	1452	1343	537	568	598	668	660	505	1265	1309	1179	675
P33599	NADH-quinone oxidoreductase subunit C/D OS=Escherichia coli (strain K12) GN=nuoC PE=1 SV=3	nuoC	31	1769.66	68174.5	2	935	3225	2613	889	1324	1542	1631	1067	1743	1579	1501	1264	206	218	509	763	896	997	1402	909	1220	1508
P0A9C5	Glutamine synthetase OS=Escherichia coli (strain K12) GN=glnA PE=1 SV=2	glnA	30	1686.3	51852.7	2	17828	7286	8691	4983	6478	7101	10251	7185	11472	7979	6991	6998	3323	3485	9159	12088	15327	10670	9280	6009	6422	13251
P09151	2-isopropylmalate synthase OS=Escherichia coli (strain K12) GN=leuA PE=1 SV=5	leuA	30	2302.65	57244.1	2	2711	885	894	4243	2917	3170	3381	2093	3700	3827	3791	5032	1835	1460	6311	4732	2207	5256	3334	4272	3468	3810
P37685	Aldehyde dehydrogenase B OS=Escherichia coli (strain K12) GN=aldB PE=1 SV=2	aldB	30	1607.71	56252.5	2	589	729	715	1711	2373	1148	1055	1359	1404	3113	4715	7135	3190	3130	714	660	501	594	1413	2931	1181	455
P06149	D-lactate dehydrogenase OS=Escherichia coli (strain K12) GN=dld PE=1 SV=3	dld	30	1565.74	64553.6	2	608	449	619	672	691	577	557	577	660	624	521	591	397	440	646	427	602	747	573	514	604	548
P37330	Malate synthase G OS=Escherichia coli (strain K12) GN=glcB PE=1 SV=3	glcB	30	1775.61	80419.9	2	282	632	658	2377	990	1074	767	289	835	1555	1741	1365	528	535	282	380	319	436	1168	1283	900	443
P0ABH7	Citrate synthase OS=Escherichia coli (strain K12) GN=gltA PE=1 SV=1	gltA	30	2043.46	47965.9	2	9671	16361	22905	34014	18189	22205	17601	37156	31664	26675	26529	25070	7346	7213	11332	15412	10203	16664	28231	18130	19403	20067
P35340	Alkyl hydroperoxide reductase subunit F OS=Escherichia coli (strain K12) GN=ahpF PE=1 SV=2	ahpF	29	1822.39	56124.1	2	2435	5161	4090	2203	2237	3951	2320	1820	2033	1795	1394	1098	388	353	2204	3201	3229	3420	2414	1484	2379	3058
P0A910	Outer membrane protein A OS=Escherichia coli (strain K12) GN=ompA PE=1 SV=1	ompA	29	2046.35	37159.6	2	119680	146530	155611	74605	80912	121079	102913	70788	123520	101824	82588	72016	103070	110803	156261	78742	116878	118659	75848	73020	89206	91352
P17169	Glucosamine--fructose-6-phosphate aminotransferase [isomerizing] OS=Escherichia coli (strain K12) GN=glmS PE=1 SV=4	glmS	29	2457.09	66834.6	2	4025	5271	5985	1661	2923	1902	3600	2797	2963	2134	1611	1396	1339	1532	2182	4978	2912	4036	2422	2110	3345	4185
P16659	Prolyl-tRNA synthetase OS=Escherichia coli (strain K12) GN=proS PE=1 SV=4	proS	29	2204.63	63634.7	2	4322	6443	5831	2267	3311	3075	3719	3209	3782	2779	2164	1944	2124	2101	2586	4049	4284	4418	3858	2720	3844	4835
P60422	50S ribosomal protein L2 OS=Escherichia coli (strain K12) GN=rplB PE=1 SV=2	rplB	29	1979.3	29824	2	14191	39858	27001	6847	9745	14393	12282	11648	17428	11427	8608	8213	7645	7045	10501	24089	14846	14197	11391	6446	10100	19492
P00452	Ribonucleoside-diphosphate reductase 1 subunit alpha OS=Escherichia coli (strain K12) GN=nrdA PE=1 SV=2	nrdA	29	1369.24	82789.6	2	560	1236	1362	348	500	742	667	724	1020	864	798	543	340	325	466	880	555	671	693	434	516	801
P27298	Oligopeptidase A OS=Escherichia coli (strain K12) GN=prlC PE=3 SV=3	prlC	29	1525.67	77100.6	2	1350	2706	1832	1084	1062	1041	1204	1029	947	811	788	601	564	594	1153	1522	1380	1116	1312	1031	1080	1324
P0A6B7	Cysteine desulfurase OS=Escherichia coli (strain K12) GN=iscS PE=1 SV=1	iscS	29	2188.87	45042.9	2	13683	12757	15753	9479	9022	10000	12342	9824	12450	8341	6609	4353	1443	1457	11673	16080	10393	15564	12332	9043	8615	14541
P13035	Aerobic glycerol-3-phosphate dehydrogenase OS=Escherichia coli (strain K12) GN=glpD PE=1 SV=3	glpD	29	1604.83	56697.1	2	135	3852	5702	107	91	97	5946	84	104	100	99	82	172	200	179	203	196	173	162	120	132	174
P0ABB0	ATP synthase subunit alpha OS=Escherichia coli (strain K12) GN=atpA PE=1 SV=1	atpA	29	2800.06	55169.7	2	14552	23968	33172	11045	16436	18991	17975	19369	16490	13452	10761	8336	5415	5207	11021	13294	11071	16490	17105	11769	20018	19100
P38038	Sulfite reductase [NADPH] flavoprotein alpha-component OS=Escherichia coli (strain K12) GN=cysJ PE=1 SV=4	cysJ	28	2175.11	66210.9	2	3317	733	2069	1571	1980	2087	2586	1873	2005	1314	907	755	361	378	1416	3200	2638	2482	2028	1414	2064	3710
P0AAI3	ATP-dependent zinc metalloprotease FtsH OS=Escherichia coli (strain K12) GN=ftsH PE=1 SV=1	ftsH	28	1906.04	70645.4	2	2236	3956	2991	1234	1660	1854	2098	1987	2340	1867	1578	1492	972	924	2218	2858	2501	2316	1823	1467	1744	2278
P0AG30	Transcription termination factor Rho OS=Escherichia coli (strain K12) GN=rho PE=1 SV=1	rho	28	2097.93	46956.6	2	3243	5934	4071	2062	2393	2286	2583	2343	2789	2213	1849	1837	1496	1529	2365	3182	3003	2727	2543	1696	2669	3129
P0A817	S-adenosylmethionine synthase OS=Escherichia coli (strain K12) GN=metK PE=1 SV=2	metK	28	1718.3	41907.2	2	12499	7068	7432	3546	5204	7452	6822	6783	7688	5236	4316	3654	1784	1539	13006	15767	23325	11499	6447	4925	6038	8535
P0ADG7	Inosine-5'-monophosphate dehydrogenase OS=Escherichia coli (strain K12) GN=guaB PE=1 SV=1	guaB	28	2370.1	51972	2	11237	5909	33132	4041	5972	5952	5556	4400	7003	4021	2795	2499	5959	6582	13023	7942	11468	8773	4655	3240	6679	7601
Q59385	Copper-exporting P-type ATPase A OS=Escherichia coli (strain K12) GN=copA PE=1 SV=4	copA	27	1782.14	87799.8	2	2769	632	2563	3707	4224	2289	3977	4131	2884	3126	2413	2376	1069	1313	2252	5318	9561	3281	3943	3083	3913	3535
P0AFF6	Transcription elongation protein nusA OS=Escherichia coli (strain K12) GN=nusA PE=1 SV=1	nusA	27	1899.01	54819.1	2	5576	10025	7264	2771	3926	4392	4323	3807	3690	3117	2480	2232	2095	2597	4843	4199	4065	5048	4600	3467	4656	5474
P0A7Z4	DNA-directed RNA polymerase subunit alpha OS=Escherichia coli (strain K12) GN=rpoA PE=1 SV=1	rpoA	27	1907.81	36471.1	2	14575	35102	25313	11406	14131	12583	14801	12963	16138	14085	10694	9661	7248	8734	15658	14407	13985	14154	11451	9998	11067	13757
P0A8N3	Lysyl-tRNA synthetase OS=Escherichia coli (strain K12) GN=lysS PE=1 SV=2	lysS	27	2561.23	57549.1	2	2565	4837	3293	1556	1890	2002	1999	1538	2393	1796	1425	1234	1410	1191	2017	3023	2738	2830	1950	1343	1945	2884
P00959	Methionyl-tRNA synthetase OS=Escherichia coli (strain K12) GN=metG PE=1 SV=2	metG	27	1588.88	76188.1	2	2082	2572	1904	1094	1274	1332	1467	1417	1506	1186	974	840	662	709	1313	2236	1622	1672	1479	1029	1295	1920
P00350	6-phosphogluconate dehydrogenase, decarboxylating OS=Escherichia coli (strain K12) GN=gnd PE=1 SV=2	gnd	27	1940.13	51431.3	2	14100	17386	16083	5501	6745	8440	8331	7002	8213	5205	3915	2953	5465	6816	10145	16349	14593	12496	7285	4801	8024	10318
P0AEE5	D-galactose-binding periplasmic protein OS=Escherichia coli (strain K12) GN=mglB PE=1 SV=1	mglB	27	1604.39	35672.4	2	3223	20143	21711	19551	28631	17801	17497	17990	20750	29600	23881	19758	3548	2762	2581	3288	3046	5655	36415	86781	27050	9705
P0AD96	Leu/Ile/Val-binding protein OS=Escherichia coli (strain K12) GN=livJ PE=1 SV=1	livJ	27	1996.57	39034	2	22968	1898	4197	21124	27978	32928	23525	22034	29684	34765	30450	23241	9484	9977	21688	17989	19798	17702	27776	23012	29892	25098
P13009	Methionine synthase OS=Escherichia coli (strain K12) GN=metH PE=1 SV=5	metH	27	1587.38	135894	2	421	270	259	178	255	302	316	306	346	255	219	188	143	101	265	226	358	421	342	230	342	492
P61889	Malate dehydrogenase OS=Escherichia coli (strain K12) GN=mdh PE=1 SV=1	mdh	27	2213	32299.2	2	53138	73162	110645	119781	69353	66984	65977	129097	71459	60446	49038	42300	16270	19387	62946	62755	35818	70658	90773	49852	71565	75763
P32132	GTP-binding protein typA/BipA OS=Escherichia coli (strain K12) GN=typA PE=1 SV=2	typA	26	1734.85	67295.5	2	3013	4316	2473	798	1200	1619	1647	1442	1372	883	775	649	970	859	1929	2442	2172	2055	1262	1109	1445	2451
P77804	Protein ydgA OS=Escherichia coli (strain K12) GN=ydgA PE=1 SV=1	ydgA	26	1469.59	54636.9	2	1215	2257	1854	1121	1140	1448	1205	915	1339	1231	1117	1117	1062	1191	1263	930	1622	1153	1001	924	1025	1117
P06971	Ferrichrome-iron receptor OS=Escherichia coli (strain K12) GN=fhuA PE=1 SV=2	fhuA	26	1525.73	82113.3	2	873	550	1093	584	899	839	889	812	1131	719	528	462	649	670	901	1188	1465	1008	861	762	888	922
P0ADY1	Peptidyl-prolyl cis-trans isomerase D OS=Escherichia coli (strain K12) GN=ppiD PE=1 SV=1	ppiD	26	1563.05	68089.8	2	1057	1678	1587	813	919	1236	1343	1031	1187	1222	968	1051	642	610	1625	1826	1401	1701	1536	1442	1397	1588
P30850	Exoribonuclease 2 OS=Escherichia coli (strain K12) GN=rnb PE=1 SV=3	rnb	26	1290.68	72427.2	2	1260	1224	916	613	739	846	903	851	904	598	454	369	544	494	890	1241	1266	1100	786	481	936	1334
P00962	Glutaminyl-tRNA synthetase OS=Escherichia coli (strain K12) GN=glnS PE=1 SV=3	glnS	26	1487.34	63419.8	2	999	1712	1511	593	742	641	845	773	814	617	520	462	377	356	662	1105	800	850	702	545	646	975
P0AB71	Fructose-bisphosphate aldolase class 2 OS=Escherichia coli (strain K12) GN=fbaA PE=1 SV=2	fbaA	26	1659.08	39104.6	2	20049	23422	26665	11352	13842	14274	15624	13943	13616	9381	8289	7067	11699	12477	23727	16391	23435	17405	10708	11298	12513	24513
P0ABK5	Cysteine synthase A OS=Escherichia coli (strain K12) GN=cysK PE=1 SV=2	cysK	26	2393.1	34450.3	2	73308	21811	70876	66764	68067	65029	68900	61734	55342	43392	32637	29423	49668	52241	85387	90613	140217	68895	66746	51117	73976	75498
P0ACY3	Uncharacterized protein yeaG OS=Escherichia coli (strain K12) GN=yeaG PE=3 SV=1	yeaG	25	1326.76	74415.6	2	519	472	316	692	704	707	705	495	889	933	1253	1431	801	820	746	508	1116	430	740	1150	554	544
P23845	Sulfate adenylyltransferase subunit 1 OS=Escherichia coli (strain K12) GN=cysN PE=1 SV=1	cysN	25	1650.37	52508	2	1520	374	898	689	923	1036	1160	1001	1534	935	576	378	150	177	643	1342	1262	1033	821	583	849	1616
P23865	Tail-specific protease OS=Escherichia coli (strain K12) GN=prc PE=1 SV=2	prc	25	1202.44	76597.7	2	506	621	521	362	401	400	451	451	422	349	290	269	213	166	391	441	486	494	406	343	423	506
P21177	Fatty acid oxidation complex subunit alpha OS=Escherichia coli (strain K12) GN=fadB PE=1 SV=2	fadB	25	1449.92	79525.4	2	173	547	371	611	924	695	279	1030	863	1689	2181	2000	333	231	207	148	151	290	1236	1177	919	330
P36938	Phosphoglucomutase OS=Escherichia coli (strain K12) GN=pgm PE=1 SV=1	pgm	25	1772.14	58306.5	2	1344	2354	1910	1344	1423	1428	1511	1628	1523	1564	1368	1408	1001	884	1226	1528	1261	1261	1337	993	1159	1278
P0A870	Transaldolase B OS=Escherichia coli (strain K12) GN=talB PE=1 SV=2	talB	25	1950.25	35179.3	2	10629	15811	18400	6722	9688	9829	11297	11222	9969	6952	4879	3774	6575	7624	13577	19427	13207	13362	9119	7722	9614	12512
P68767	Cytosol aminopeptidase OS=Escherichia coli (strain K12) GN=pepA PE=1 SV=1	pepA	25	1456.6	54827	2	1076	1675	1003	710	995	1175	1171	1191	1653	1469	1329	1239	711	731	919	1168	968	1144	1031	922	877	1222
P00934	Threonine synthase OS=Escherichia coli (strain K12) GN=thrC PE=1 SV=1	thrC	25	1740.99	47066.2	2	14609	3501	3458	5601	8868	9013	11109	19636	8769	5094	3423	2992	4984	5352	17522	7455	9543	16975	9142	4676	10117	14507
P0A9P0	Dihydrolipoyl dehydrogenase OS=Escherichia coli (strain K12) GN=lpdA PE=1 SV=2	lpdA	25	1872.62	50638.6	2	12596	30101	21772	9067	12061	12933	10310	24279	13633	10919	8931	7422	7512	8180	11509	11786	12079	15082	12836	9013	14318	14094
P75691	Uncharacterized zinc-type alcohol dehydrogenase-like protein YahK OS=Escherichia coli (strain K12) GN=yahK PE=1 SV=1	yahK	24	1682.03	37935.9	2	1474	877	1504	2785	2231	2018	1763	1249	1746	2579	3012	3426	3272	3520	3444	2385	3829	1511	1696	2620	1707	1233
P0ABZ6	Chaperone surA OS=Escherichia coli (strain K12) GN=surA PE=1 SV=1	surA	24	1270.98	47236.2	2	1554	2548	1814	900	1125	1132	1299	1207	1029	983	880	811	793	676	1516	1404	1217	1239	1187	1184	1189	1409
P21499	Ribonuclease R OS=Escherichia coli (strain K12) GN=rnr PE=1 SV=2	rnr	24	1333.47	92033.5	2	251	439	240	238	290	372	314	302	497	351	325	326	249	305	337	476	338	337	321	238	282	444
P0A8M0	Asparaginyl-tRNA synthetase OS=Escherichia coli (strain K12) GN=asnS PE=1 SV=2	asnS	24	1660.49	52519.4	2	5528	5818	5849	3184	3617	4003	3970	3496	4366	3555	3046	2671	1909	1914	3375	7486	4589	4852	4182	2919	4024	5449
P0A8L1	Seryl-tRNA synthetase OS=Escherichia coli (strain K12) GN=serS PE=1 SV=1	serS	24	1656.07	48365.5	2	2528	5806	3511	1949	1914	1938	2129	2117	2053	1696	1333	1221	1700	1602	2502	2719	2866	3166	2086	1408	2091	2785
P0AEX9	Maltose-binding periplasmic protein OS=Escherichia coli (strain K12) GN=malE PE=1 SV=1	malE	24	1530.97	43342.4	2	2142	8460	7545	3656	7252	7128	6138	5040	13536	18169	14817	9208	1023	979	784	492	624	1065	10665	5584	6087	5038
P0A786	Aspartate carbamoyltransferase catalytic chain OS=Escherichia coli (strain K12) GN=pyrB PE=1 SV=2	pyrB	24	1431.12	34387.8	2	8888	908	897	7536	13350	9546	11773	6609	20205	12109	7452	7206	4185	4476	8830	7441	10437	10274	8817	10136	12674	10761
P05791	Dihydroxy-acid dehydratase OS=Escherichia coli (strain K12) GN=ilvD PE=1 SV=5	ilvD	24	1475.31	65471.8	2	1199	495	386	504	679	898	710	994	841	510	383	277	574	554	2083	1160	1144	1476	804	444	719	1215
P77748	Uncharacterized protein ydiJ OS=Escherichia coli (strain K12) GN=ydiJ PE=4 SV=1	ydiJ	24	1182.07	113158	2	231	125	177	209	236	235	250	250	274	298	260	254	47	33	60	207	173	212	204	152	291	326
P17315	Colicin I receptor OS=Escherichia coli (strain K12) GN=cirA PE=1 SV=2	cirA	23	1760.5	73832.3	2	575	272	1063	234	416	840	474	352	367	252	117	112	3116	3062	5398	423	446	2512	371	180	432	866
P0ABH9	ATP-dependent Clp protease ATP-binding subunit ClpA OS=Escherichia coli (strain K12) GN=clpA PE=1 SV=1	clpA	23	1518.37	84136.9	2	530	1474	714	357	365	499	503	437	622	463	423	356	157	153	447	598	555	631	571	327	384	670
P0C0V0	Protease do OS=Escherichia coli (strain K12) GN=degP PE=1 SV=1	degP	23	1640.41	49305.4	2	3338	2586	2031	1531	2217	1434	3359	6153	1306	1190	1244	1091	900	1050	2095	5604	3353	2284	2793	1705	2179	4096
P31554	LPS-assembly protein lptD OS=Escherichia coli (strain K12) GN=lptD PE=1 SV=2	lptD	23	1380.25	89597.2	2	523	915	723	295	353	520	363	356	374	361	339	308	389	390	583	537	607	431	345	372	338	356
P06612	DNA topoisomerase 1 OS=Escherichia coli (strain K12) GN=topA PE=1 SV=2	topA	23	1185.9	97270.3	2	355	890	396	205	296	357	339	270	406	395	372	392	273	232	262	392	322	392	350	227	337	410
P11875	Arginyl-tRNA synthetase OS=Escherichia coli (strain K12) GN=argS PE=1 SV=1	argS	23	1294.61	64623.8	2	941	1457	1088	445	583	641	653	580	549	462	345	331	289	217	561	815	647	719	604	536	650	825
P04805	Glutamyl-tRNA synthetase OS=Escherichia coli (strain K12) GN=gltX PE=1 SV=1	gltX	23	1464.42	53763.8	2	2561	4337	3151	1455	1779	1824	1902	1668	1616	1258	1016	815	1088	1187	2351	2302	2429	2164	1611	1150	1699	2176
P0A7V0	30S ribosomal protein S2 OS=Escherichia coli (strain K12) GN=rpsB PE=1 SV=2	rpsB	23	1290.05	26708.8	2	29156	71379	43644	13074	19635	17981	23668	16559	20848	13735	10701	8874	11087	12600	26507	28549	24586	31041	23900	16697	24909	36854
P33363	Periplasmic beta-glucosidase OS=Escherichia coli (strain K12) GN=bglX PE=1 SV=2	bglX	23	1148.94	83389.5	2	157	324	259	117	139	125	150	157	113	100	79	56	57	54	95	121	87	137	119	74	116	127
P0C8J6	D-tagatose-1,6-bisphosphate aldolase subunit GatY OS=Escherichia coli (strain K12) GN=gatY PE=1 SV=1	gatY	23	1240.46	30774.6	2	4939	11402	12277	38995	26974	15537	14000	17087	22426	23039	16483	19399	912	800	2637	1867	3891	7353	19955	15768	25688	12285
P69786	PTS system glucose-specific EIICB component OS=Escherichia coli (strain K12) GN=ptsG PE=1 SV=1	ptsG	23	1237.08	50625.7	2	2775	1617	1023	559	794	2340	917	742	9402	6753	3919	2381	1174	1415	1519	3329	2356	1323	862	642	783	3180
P05020	Dihydroorotase OS=Escherichia coli (strain K12) GN=pyrC PE=1 SV=2	pyrC	23	1515.82	38784.6	2	4485	1030	1612	2403	4090	3330	3499	3718	3403	2288	1451	1152	2725	2572	5648	4483	5176	3992	3307	3020	4427	4284
P11447	Argininosuccinate lyase OS=Escherichia coli (strain K12) GN=argH PE=1 SV=3	argH	23	1699.87	50268.6	2	2883	808	635	1219	1416	1594	1802	1328	1523	944	803	738	1158	750	1806	3332	2508	1922	1460	1020	1281	2019
P22106	Asparagine synthetase B [glutamine-hydrolyzing] OS=Escherichia coli (strain K12) GN=asnB PE=1 SV=3	asnB	23	1724.71	62601.1	2	1154	828	6791	972	879	982	1192	1305	1044	973	784	593	351	314	836	1947	1145	1221	1109	689	780	1542
P00509	Aspartate aminotransferase OS=Escherichia coli (strain K12) GN=aspC PE=1 SV=1	aspC	23	1641.47	43528	2	6985	4145	5583	7853	8584	9102	8701	8218	7922	6683	4338	3113	3025	2860	7744	7439	9964	9984	8644	6698	9920	9171
P0A836	Succinyl-CoA ligase [ADP-forming] subunit beta OS=Escherichia coli (strain K12) GN=sucC PE=1 SV=1	sucC	23	1617.83	41348.6	2	6213	15855	16160	19647	14112	15077	11673	18432	15489	12857	10426	9453	2290	2482	4642	5952	5121	11712	15249	7735	16995	11574
P0AGE9	Succinyl-CoA ligase [ADP-forming] subunit alpha OS=Escherichia coli (strain K12) GN=sucD PE=1 SV=2	sucD	23	1502.7	29740.5	2	6924	19013	20933	25370	14862	15755	12729	19455	15469	13091	10352	8930	3655	3501	7173	7085	6878	11505	14388	8241	16262	11996
P0A6H1	ATP-dependent Clp protease ATP-binding subunit ClpX OS=Escherichia coli (strain K12) GN=clpX PE=1 SV=2	clpX	22	1319.8	46309.2	2	3251	5494	4162	1568	2148	2109	2649	2021	2326	1701	1316	1038	995	1230	2801	4017	3046	3337	2154	1707	1954	3181
P0A6H5	ATP-dependent protease ATPase subunit HslU OS=Escherichia coli (strain K12) GN=hslU PE=1 SV=1	hslU	22	1236.1	49544.8	2	1367	4825	2667	859	1188	1300	1351	985	1286	1040	810	715	1042	934	1126	2370	1644	1607	1202	749	1278	1553
P30958	Transcription-repair-coupling factor OS=Escherichia coli (strain K12) GN=mfd PE=1 SV=2	mfd	22	1202.99	129883	2	73	130	87	73	67	84	62	106	103	94	62	72	39	51	55	121	102	90	86	52	78	93
P08312	Phenylalanyl-tRNA synthetase alpha chain OS=Escherichia coli (strain K12) GN=pheS PE=1 SV=2	pheS	22	1689.92	36790.7	2	5078	6584	5411	2651	3557	3601	4038	3740	3916	3415	3326	2978	1930	1827	2912	4645	3781	3676	3871	3106	3461	4408
P24182	Biotin carboxylase OS=Escherichia coli (strain K12) GN=accC PE=1 SV=2	accC	22	1191.11	49271.3	2	1810	5352	3168	1046	1569	1333	1586	1376	1275	1090	867	769	779	744	964	2184	1612	1451	1397	1045	1567	1778
P0A953	3-oxoacyl-[acyl-carrier-protein] synthase 1 OS=Escherichia coli (strain K12) GN=fabB PE=1 SV=1	fabB	22	1881.89	42568.1	2	13467	23274	22952	10932	12979	13563	13960	14117	12734	11361	10026	9499	6097	5750	13101	15282	15507	12334	12581	11989	14156	12408
Q47146	Acyl-coenzyme A dehydrogenase OS=Escherichia coli (strain K12) GN=fadE PE=2 SV=2	fadE	22	1395.13	89149.8	2	86	189	129	311	187	218	118	403	416	529	444	347	261	264	142	147	51	120	289	111	141	197
P0C8J8	D-tagatose-1,6-bisphosphate aldolase subunit gatZ OS=Escherichia coli (strain K12) GN=gatZ PE=1 SV=1	gatZ	22	1516.04	47060.8	2	1413	12320	4943	11766	5521	6579	2892	6296	3805	4062	2647	2527	288	309	802	1015	979	2558	3637	7007	5815	4363
P0A7D4	Adenylosuccinate synthetase OS=Escherichia coli (strain K12) GN=purA PE=1 SV=2	purA	22	1544.12	47297.3	2	6863	13171	4918	5986	5337	5947	6453	6140	8400	6694	4795	4565	3590	3796	6669	4886	7552	7917	4620	4776	5623	6728
P0A7E5	CTP synthase OS=Escherichia coli (strain K12) GN=pyrG PE=1 SV=2	pyrG	22	1209.43	60318.1	2	960	1991	1158	390	667	633	755	627	707	451	350	265	366	370	622	786	718	775	582	476	746	916
P00895	Anthranilate synthase component 1 OS=Escherichia coli (strain K12) GN=trpE PE=1 SV=2	trpE	22	1161.99	57440.1	2	1090	269	243	466	727	961	1318	991	1558	1091	878	790	309	296	725	1387	810	784	858	818	786	1472
P09832	Glutamate synthase [NADPH] small chain OS=Escherichia coli (strain K12) GN=gltD PE=1 SV=3	gltD	22	1254.84	51964	2	2965	323	497	1293	1502	1675	2327	1553	1428	1286	1241	949	160	94	1091	2265	2949	2327	1480	1650	1394	3008
P08142	Acetolactate synthase isozyme 1 large subunit OS=Escherichia coli (strain K12) GN=ilvB PE=1 SV=1	ilvB	22	1367.73	60383.8	2	1823	2174	2020	1405	1490	1584	2037	762	2063	1617	1203	1098	77	82	1232	989	636	1650	1954	916	1706	1648
P26616	NAD-dependent malic enzyme OS=Escherichia coli (strain K12) GN=maeA PE=1 SV=4	maeA	22	1291.18	63139.2	2	528	1348	893	612	584	464	481	480	534	369	290	239	129	166	297	360	285	445	442	284	519	512
P07014	Succinate dehydrogenase iron-sulfur subunit OS=Escherichia coli (strain K12) GN=sdhB PE=1 SV=1	sdhB	22	1206.05	26734.2	2	2481	9036	6147	7106	4363	4627	3332	5225	3939	4218	3573	3502	748	706	1794	1711	2209	2972	5137	3077	5865	4132
P37689	2,3-bisphosphoglycerate-independent phosphoglycerate mutase OS=Escherichia coli (strain K12) GN=gpmI PE=1 SV=1	gpmI	22	1532.01	56140.3	2	2656	2064	2465	460	726	2001	1657	593	1709	799	665	556	919	980	1937	2580	3060	2466	1087	944	644	3645
P38054	Cation efflux system protein CusA OS=Escherichia coli (strain K12) GN=cusA PE=1 SV=2	cusA	21	1287.43	114616	2	356	204	168	372	428	151	452	277	337	307	209	159	253	83	158	497	308	312	467	249	441	771
P0ABC7	Modulator of FtsH protease HflK OS=Escherichia coli (strain K12) GN=hflK PE=1 SV=1	hflK	21	1460.75	45499.1	2	1349	2346	1673	980	1331	1105	1509	1406	1321	1167	1066	910	749	798	988	1647	980	1201	1314	899	1097	1511
P02930	Outer membrane protein tolC OS=Escherichia coli (strain K12) GN=tolC PE=1 SV=3	tolC	21	1721.5	53690.2	2	4884	6584	6392	3449	4196	4309	4795	3737	3279	2881	2593	2501	3002	3266	5240	5278	5327	5212	4831	4374	4628	5378
P62399	50S ribosomal protein L5 OS=Escherichia coli (strain K12) GN=rplE PE=1 SV=2	rplE	21	1537.62	20270.7	2	31769	69275	50152	13321	19299	20813	22717	15729	20923	13137	10395	8098	9460	7687	21562	26237	24713	27202	22579	14265	23442	31745
P0ABD5	Acetyl-coenzyme A carboxylase carboxyl transferase subunit alpha OS=Escherichia coli (strain K12) GN=accA PE=1 SV=2	accA	21	1388.86	35201.3	2	3825	7972	6785	1944	2826	2718	3077	2904	2809	2315	1950	1902	1432	1575	2992	3427	2928	2718	2905	2328	2616	3132
P0A7A7	Glycerol-3-phosphate acyltransferase OS=Escherichia coli (strain K12) GN=plsB PE=1 SV=2	plsB	21	1093.16	91305.5	2	192	370	219	162	176	194	190	279	264	239	258	284	186	149	135	303	218	218	199	178	175	257
P05459	Erythronate-4-phosphate dehydrogenase OS=Escherichia coli (strain K12) GN=pdxB PE=2 SV=2	pdxB	21	1159.7	41323.8	2	737	801	831	381	530	657	646	621	575	472	388	354	489	401	716	828	961	741	582	564	677	850
P23721	Phosphoserine aminotransferase OS=Escherichia coli (strain K12) GN=serC PE=1 SV=4	serC	21	1252.06	39740	2	18150	3178	5737	8002	7696	10627	9686	8722	7670	6022	4739	3261	6297	5723	17258	18691	21311	15676	9854	7996	10047	15637
P0A867	Transaldolase A OS=Escherichia coli (strain K12) GN=talA PE=1 SV=1	talA	21	1563.1	35618.5	2	1446	953	1115	1327	1279	1483	1364	849	966	1063	1516	1879	2894	3220	2017	2303	3784	1192	1304	2589	1109	988
P00944	Xylose isomerase OS=Escherichia coli (strain K12) GN=xylA PE=3 SV=1	xylA	21	1227.4	49692.5	2	260	556	399	219	204	246	228	195	212	181	167	167	165	173	287	329	348	30351	194	211	222	240
P0AC53	Glucose-6-phosphate 1-dehydrogenase OS=Escherichia coli (strain K12) GN=zwf PE=1 SV=1	zwf	21	1176.15	55651.3	2	1234	1508	1154	625	843	1117	1171	998	997	816	864	920	1056	1011	1291	1849	1562	1773	986	1198	871	1519
P08660	Lysine-sensitive aspartokinase 3 OS=Escherichia coli (strain K12) GN=lysC PE=1 SV=2	lysC	21	1470.14	48483.4	2	3720	383	474	1318	869	1401	1832	2152	1577	876	591	447	841	816	2160	3177	3665	2771	2174	1021	1104	3264
P07023	T-protein OS=Escherichia coli (strain K12) GN=tyrA PE=1 SV=1	tyrA	21	1161.21	41997.9	2	1416	501	328	866	591	754	1233	2267	1043	507	383	318	191	124	461	1236	703	447	725	631	590	1806
P0AEM9	Cystine-binding periplasmic protein OS=Escherichia coli (strain K12) GN=fliY PE=1 SV=1	fliY	21	1343.12	29003.2	2	11402	3133	8454	9115	9255	11166	11401	7942	8873	6956	5875	5140	8947	8974	11002	11015	15377	8176	10098	9467	8826	11498
P0AFG6	Dihydrolipoyllysine-residue succinyltransferase component of 2-oxoglutarate dehydrogenase complex OS=Escherichia coli (strain K12) GN=sucB PE=1 SV=2	sucB	21	1441.27	43966	2	5252	15565	13586	10292	6935	7557	5558	9948	6097	5079	4078	3836	3484	3943	5469	6113	5922	7246	6495	3454	7197	6296
P22259	Phosphoenolpyruvate carboxykinase [ATP] OS=Escherichia coli (strain K12) GN=pckA PE=1 SV=2	pckA	21	1651.23	59588	2	1147	9848	9999	7097	8349	6004	5292	8611	5553	7880	6325	5504	1202	972	1192	1126	1012	2848	6681	5397	8367	2422
P0AFK0	Protein pmbA OS=Escherichia coli (strain K12) GN=pmbA PE=1 SV=1	pmbA	20	1315.39	48321.4	2	1295	1789	1552	878	872	878	1072	906	783	713	555	540	320	350	1125	1132	1137	1077	941	658	844	1046
P0ADE8	tRNA-modifying protein ygfZ OS=Escherichia coli (strain K12) GN=ygfZ PE=1 SV=2	ygfZ	20	1097.04	36053.4	2	1610	2457	2423	1629	1781	1776	2020	1789	1599	1361	1202	1070	849	777	1503	2206	2037	1985	1764	1655	1837	2082
P05825	Ferrienterobactin receptor OS=Escherichia coli (strain K12) GN=fepA PE=1 SV=2	fepA	20	1254.96	82038.5	2	374	222	374	131	166	330	182	212	129	104	101	72	1366	1494	2026	247	521	840	174	109	202	239
P75780	Catecholate siderophore receptor fiu OS=Escherichia coli (strain K12) GN=fiu PE=1 SV=1	fiu	20	1242.23	81891.9	2	202	377	481	98	116	244	111	65	110	70	49	38	1098	1079	1628	200	563	660	83	60	127	132
P09169	Protease 7 OS=Escherichia coli (strain K12) GN=ompT PE=1 SV=1	ompT	20	1635.49	35522.3	2	13908	7843	18400	8657	11123	11163	9579	7822	10293	8302	7206	5433	7261	8308	17959	26649	13936	12606	9674	7420	10810	9831
P0A698	UvrABC system protein A OS=Escherichia coli (strain K12) GN=uvrA PE=1 SV=1	uvrA	20	1115.87	103785	2	127	228	131	105	105	169	118	106	142	135	142	173	135	134	125	175	210	143	101	141	112	125
P0A9P9	Gluconate 5-dehydrogenase OS=Escherichia coli (strain K12) GN=idnO PE=3 SV=1	idnO	20	1815.51	27527.2	1	601	1048	NA	391	500	14988	385	444	488	571	490	360	607	431	525	530	512	NA	NA	288	404	NA
P18843	NH(3)-dependent NAD(+) synthetase OS=Escherichia coli (strain K12) GN=nadE PE=1 SV=2	nadE	20	1181.19	30599.8	2	3939	2222	2917	2353	2354	2548	3084	2187	2610	2016	2006	1752	1985	2060	4554	3508	4157	3532	2664	2569	2148	3320
P0A6P9	Enolase OS=Escherichia coli (strain K12) GN=eno PE=1 SV=2	eno	20	1590.44	45608.4	2	36150	40037	41120	19247	21413	30880	26523	19565	23999	15737	14110	14591	30291	30460	43102	38137	48089	47429	26705	26023	23507	52589
P27302	Transketolase 1 OS=Escherichia coli (strain K12) GN=tktA PE=1 SV=5	tktA	20	1584.03	72147.9	2	3883	7519	5275	2661	3662	3211	3392	3675	3388	2823	1961	1508	894	865	2487	3371	3182	3945	3192	1625	3721	3669
P0ABP8	Purine nucleoside phosphorylase deoD-type OS=Escherichia coli (strain K12) GN=deoD PE=1 SV=2	deoD	20	1278.35	25915	2	2764	18649	7113	2242	3099	2695	3391	2187	3044	2693	2523	2161	1807	1650	2875	3156	2904	2883	3111	2741	3259	3228
P24171	Peptidyl-dipeptidase dcp OS=Escherichia coli (strain K12) GN=dcp PE=1 SV=4	dcp	20	1362.56	77449	2	591	411	627	532	588	545	533	393	485	425	398	341	294	244	668	651	749	687	516	488	411	500
P37095	Peptidase B OS=Escherichia coli (strain K12) GN=pepB PE=1 SV=2	pepB	20	1453.69	46133.3	2	3155	3891	4806	2673	3114	3228	3464	2713	3874	2996	2681	2703	1228	1317	2417	2760	2136	3173	4087	2576	3347	3399
P09551	Lysine-arginine-ornithine-binding periplasmic protein OS=Escherichia coli (strain K12) GN=argT PE=1 SV=3	argT	20	1428.72	27956.2	2	6161	4553	7114	12700	22538	14051	13118	16269	12148	22782	23995	24775	6511	6180	5842	3823	4575	5244	22449	29463	20307	7773
P31660	2-methylcitrate synthase OS=Escherichia coli (strain K12) GN=prpC PE=1 SV=2	prpC	20	1179.96	43057	2	470	278	156	156	651	415	301	198	249	985	1092	795	234	203	542	709	331	450	330	1045	275	375
P27306	Soluble pyridine nucleotide transhydrogenase OS=Escherichia coli (strain K12) GN=sthA PE=1 SV=5	sthA	20	1458.79	51509.8	2	445	2699	2911	1315	1819	1306	1020	1125	2048	1554	1236	1161	298	313	432	320	523	771	1284	1178	1998	706
Q46856	Alcohol dehydrogenase YqhD OS=Escherichia coli (strain K12) GN=yqhD PE=1 SV=1	yqhD	20	1170.24	42052.8	2	1052	5796	664	453	436	457	1622	457	670	357	352	323	712	757	1445	3364	660	1772	511	352	266	2683
P11454	Enterobactin synthase component F OS=Escherichia coli (strain K12) GN=entF PE=1 SV=3	entF	19	1083.91	141884	2	43	32	51	33	25	44	32	32	35	27	30	15	59	69	265	47	79	167	19	26	23	32
P0AE06	Acriflavine resistance protein A OS=Escherichia coli (strain K12) GN=acrA PE=1 SV=1	acrA	19	1186.07	42153.1	2	2423	4522	3136	1248	1785	1924	2050	1941	1680	1501	1325	1250	1567	1429	2148	2479	2366	2102	1808	1531	1816	2161
P02931	Outer membrane protein F OS=Escherichia coli (strain K12) GN=ompF PE=1 SV=1	ompF	19	1364.11	39291.1	2	24017	15901	66034	20980	34911	42434	36613	27427	44750	45283	33812	25177	8106	8718	11333	8629	12146	23155	30964	19739	28643	27043
P0A903	Lipoprotein 34 OS=Escherichia coli (strain K12) GN=nlpB PE=1 SV=1	bamC	19	1294.42	36801.6	2	1753	2346	2245	903	1167	1556	1349	1393	1000	886	746	643	1430	1155	2405	1801	2152	1694	1471	1207	1355	1651
P60906	Histidyl-tRNA synthetase OS=Escherichia coli (strain K12) GN=hisS PE=1 SV=2	hisS	19	1212.13	46982	2	1889	2845	2411	979	1256	1244	1328	1179	1174	957	824	721	620	649	1066	2057	1281	1633	1279	1088	1284	1668
P0A7L0	50S ribosomal protein L1 OS=Escherichia coli (strain K12) GN=rplA PE=1 SV=2	rplA	19	1468.25	24696.3	2	28502	76877	47366	11672	17445	19397	20511	15169	17008	12046	8260	7745	9632	10588	21184	23302	22215	24473	18987	12511	18603	26063
P0AEK4	Enoyl-[acyl-carrier-protein] reductase [NADH] OS=Escherichia coli (strain K12) GN=fabI PE=1 SV=2	fabI	19	1462.86	27828	2	5014	9391	7244	2894	3971	4021	3821	4006	3836	3063	2532	2436	2467	2060	3240	4009	3924	3119	2603	2308	3421	3593
P02943	Maltoporin OS=Escherichia coli (strain K12) GN=lamB PE=1 SV=1	lamB	19	1117.43	49862.6	2	903	2585	3675	1032	2084	3312	1671	1206	2979	5791	3176	2392	176	227	529	495	498	482	1993	1159	1519	1193
P00490	Maltodextrin phosphorylase OS=Escherichia coli (strain K12) GN=malP PE=1 SV=7	malP	19	927.49	90447.6	2	274	442	348	157	223	307	274	222	564	447	339	221	126	128	136	216	292	226	397	177	237	439
P0A796	6-phosphofructokinase isozyme 1 OS=Escherichia coli (strain K12) GN=pfkA PE=1 SV=1	pfkA	19	800.26	34801.7	2	1448	1377	1480	834	1004	1120	1269	809	1407	956	892	821	587	658	1180	1138	1323	1574	965	1165	833	1988
P00550	PTS system mannitol-specific EIICBA component OS=Escherichia coli (strain K12) GN=mtlA PE=1 SV=1	mtlA	19	1307.28	67910.6	2	570	1626	1611	812	1168	1136	1294	548	1660	1777	2260	2309	1125	1432	426	888	766	831	1612	1217	1121	1014
P02925	D-ribose-binding periplasmic protein OS=Escherichia coli (strain K12) GN=rbsB PE=1 SV=1	rbsB	19	1150.81	30913.4	2	5038	20979	19251	13630	22714	17335	18597	26849	15985	20165	20926	20437	5865	6312	2969	5295	3651	3592	24567	23418	22037	10739
P0AB89	Adenylosuccinate lyase OS=Escherichia coli (strain K12) GN=purB PE=1 SV=1	purB	19	1170.33	51492.6	2	1933	1442	1883	714	1407	1527	1496	1509	1829	1092	827	670	766	772	1380	2238	1527	2118	1510	914	1961	2480
P18335	Acetylornithine/succinyldiaminopimelate aminotransferase OS=Escherichia coli (strain K12) GN=argD PE=1 SV=4	argD	19	1451.07	43721.1	2	3919	517	582	1549	1776	2609	2286	2482	2760	2304	2646	2661	1133	1288	2198	3406	3337	2085	1992	2884	2023	2928
P0A6A6	3-isopropylmalate dehydratase large subunit OS=Escherichia coli (strain K12) GN=leuC PE=1 SV=2	leuC	19	1235.05	49832	2	2763	559	714	3551	2940	3602	2920	2111	2186	3098	3090	3612	228	170	1612	1204	1110	2281	2073	2279	2803	2576
P0A879	Tryptophan synthase beta chain OS=Escherichia coli (strain K12) GN=trpB PE=1 SV=2	trpB	19	1085.02	42937.6	2	5377	750	856	2213	2117	3411	4071	4077	3154	2759	2237	1658	1140	1220	3994	4651	3340	3845	3916	2646	3105	5135
P33195	Glycine dehydrogenase [decarboxylating] OS=Escherichia coli (strain K12) GN=gcvP PE=1 SV=3	gcvP	19	1088.83	104292	2	337	1071	892	211	320	303	357	216	446	236	229	196	149	153	230	390	322	334	371	221	413	500
P00562	Bifunctional aspartokinase/homoserine dehydrogenase 2 OS=Escherichia coli (strain K12) GN=metL PE=1 SV=3	metL	19	1039.11	88814.6	2	343	228	170	182	128	193	214	171	326	171	180	162	106	95	219	474	354	265	218	165	177	390
P37902	Glutamate/aspartate periplasmic-binding protein OS=Escherichia coli (strain K12) GN=gltI PE=1 SV=2	gltI	19	1370.85	33381.2	2	4936	3664	3588	4577	7005	5538	5920	5735	4916	4862	4788	4218	5316	5179	5783	4444	7465	3828	6017	5282	5178	4554
P0A9X4	Rod shape-determining protein mreB OS=Escherichia coli (strain K12) GN=mreB PE=1 SV=1	mreB	19	1233	36911	2	3277	5376	4651	2216	3073	2834	3507	3182	3402	2557	2161	2055	1802	1745	2263	3421	3214	3110	2295	2646	3009	3646
P06715	Glutathione reductase OS=Escherichia coli (strain K12) GN=gor PE=1 SV=1	gor	19	1191	48723.6	2	986	1398	1585	765	990	1221	996	969	944	854	775	674	836	830	1038	1166	1201	1235	1144	970	1069	1134
P31979	NADH-quinone oxidoreductase subunit F OS=Escherichia coli (strain K12) GN=nuoF PE=1 SV=3	nuoF	19	929.2	49242.9	2	393	2075	1603	510	792	799	859	652	942	931	991	845	77	80	152	291	408	463	763	586	808	791
P67910	ADP-L-glycero-D-manno-heptose-6-epimerase OS=Escherichia coli (strain K12) GN=hldD PE=1 SV=1	hldD	19	1131.92	34853.1	2	2898	4708	3874	2286	2384	2970	2507	2274	2018	1608	1545	1460	2175	2469	3584	2810	3761	2945	2131	2401	2363	2670
P0AGD7	Signal recognition particle protein OS=Escherichia coli (strain K12) GN=ffh PE=1 SV=1	ffh	18	1223.97	49737.2	2	925	1665	1030	469	617	563	712	622	736	523	443	438	290	350	654	852	699	766	678	480	521	821
P0AG90	Protein-export membrane protein secD OS=Escherichia coli (strain K12) GN=secD PE=3 SV=1	secD	18	1003.3	66572.7	2	430	879	623	300	376	462	422	486	538	467	397	385	243	242	318	595	441	479	472	307	470	617
P76116	Uncharacterized protein YncE OS=Escherichia coli (strain K12) GN=yncE PE=1 SV=1	yncE	18	1143.63	38571.4	2	3466	1954	5201	1708	2750	2936	2998	3231	2163	1503	938	637	6153	6004	13167	4097	5043	7952	2858	1512	3206	4092
P16700	Thiosulfate-binding protein OS=Escherichia coli (strain K12) GN=cysP PE=1 SV=1	cysP	18	1026.7	37573.3	2	3914	804	2019	2680	3380	2737	3187	3430	2239	1954	1548	1446	1990	1579	2616	3213	3877	2121	3104	2464	3110	3166
P60785	Elongation factor 4 OS=Escherichia coli (strain K12) GN=lepA PE=1 SV=1	lepA	18	1104.96	66510.3	2	748	1579	1163	349	567	738	656	966	898	761	619	612	292	279	415	856	613	676	693	492	566	935
P06996	Outer membrane protein C OS=Escherichia coli (strain K12) GN=ompC PE=1 SV=1	ompC	18	1285.11	40325.4	2	33621	73854	22077	42037	31350	16208	26933	42652	13185	13997	18369	23418	25431	25706	42508	48132	72556	32797	25131	31859	26711	29957
P0A8J8	ATP-dependent RNA helicase rhlB OS=Escherichia coli (strain K12) GN=rhlB PE=1 SV=2	rhlB	18	1043.46	47078.4	2	497	938	608	349	383	437	412	415	535	447	399	369	197	190	409	504	505	573	374	352	412	570
P46837	Protein yhgF OS=Escherichia coli (strain K12) GN=yhgF PE=1 SV=3	yhgF	18	967.85	85048.9	2	169	329	259	104	127	150	135	143	209	165	113	92	63	74	164	312	201	219	157	92	164	247
P60240	RNA polymerase-associated protein rapA OS=Escherichia coli (strain K12) GN=rapA PE=1 SV=2	rapA	18	870.09	109683	2	84	540	185	65	62	100	74	54	106	85	76	88	80	79	56	101	104	86	76	47	61	96
P0A7V3	30S ribosomal protein S3 OS=Escherichia coli (strain K12) GN=rpsC PE=1 SV=2	rpsC	18	1108.11	25949.2	2	15952	46854	33770	7222	11330	15673	13263	12018	20466	13375	10522	8754	8495	8336	10497	20333	13781	17545	13133	7082	13501	23409
P0AB77	2-amino-3-ketobutyrate coenzyme A ligase OS=Escherichia coli (strain K12) GN=kbl PE=1 SV=1	kbl	18	1099.45	43071.7	2	172	2297	1560	146	131	113	108	122	103	76	67	64	105	98	161	126	200	180	115	87	126	144
P0A6K6	Phosphopentomutase OS=Escherichia coli (strain K12) GN=deoB PE=1 SV=1	deoB	18	982.98	44323.9	2	1012	5977	1676	1327	1371	1232	1186	1027	1327	1410	1431	1432	3187	3479	2339	2058	2907	1428	1377	1718	1259	1215
P21599	Pyruvate kinase II OS=Escherichia coli (strain K12) GN=pykA PE=1 SV=3	pykA	18	1411.98	51306.7	2	1902	3343	2848	1421	1794	2501	2282	2181	1975	1918	1767	1592	1003	1063	1310	2311	1740	1864	2105	1974	1821	2178
P0A858	Triosephosphate isomerase OS=Escherichia coli (strain K12) GN=tpiA PE=1 SV=1	tpiA	18	1387.03	26936.8	2	7438	7527	9704	7717	7758	7387	7456	6822	9314	7055	6336	5726	6878	8369	13299	8159	15012	9808	6227	7399	6250	9342
P31120	Phosphoglucosamine mutase OS=Escherichia coli (strain K12) GN=glmM PE=1 SV=3	glmM	18	1441.11	47495.5	2	1087	2582	1867	729	1005	1241	1104	1115	1443	1253	1194	1132	971	891	1116	1604	1354	1319	1196	931	952	1432
P69797	PTS system mannose-specific EIIAB component OS=Escherichia coli (strain K12) GN=manX PE=1 SV=2	manX	18	1234.71	35007.5	2	2291	2890	1963	1954	1913	6248	2823	1066	12029	8451	5642	3095	2021	1766	1455	2224	2055	2525	3850	1564	1778	4613
P69441	Adenylate kinase OS=Escherichia coli (strain K12) GN=adk PE=1 SV=1	adk	18	1101.67	23553.3	2	5283	8199	4816	4032	4676	3783	3675	5148	3157	3108	2560	2265	2499	2701	6827	4717	5234	4643	4013	2833	5878	4457
P0AB91	Phospho-2-dehydro-3-deoxyheptonate aldolase, Phe-sensitive OS=Escherichia coli (strain K12) GN=aroG PE=1 SV=1	aroG	18	1710.75	37967.5	2	6678	1722	3319	2754	2806	4159	3616	2625	4897	2662	2034	1666	4568	4501	9996	6426	10774	7572	3340	3177	3621	6780
P21170	Biosynthetic arginine decarboxylase OS=Escherichia coli (strain K12) GN=speA PE=1 SV=2	speA	18	1314.3	73833.4	2	1295	1661	1897	637	824	891	1105	985	903	667	665	581	311	365	579	831	1059	876	818	742	722	1103
P0AEZ1	5,10-methylenetetrahydrofolate reductase OS=Escherichia coli (strain K12) GN=metF PE=1 SV=1	metF	18	1143.69	33063.8	2	4385	853	650	2229	2025	2400	3360	1937	2465	1305	1242	924	1060	857	3128	3764	4741	3745	2694	2160	2317	4255
P39346	L-idonate 5-dehydrogenase OS=Escherichia coli (strain K12) GN=idnD PE=1 SV=1	idnD	18	1147.39	37104.3	1	274	382	NA	129	144	8006	185	171	153	150	138	143	116	68	241	229	203	NA	NA	102	102	NA
P25526	Succinate-semialdehyde dehydrogenase [NADP+] OS=Escherichia coli (strain K12) GN=gabD PE=1 SV=1	gabD	18	1025.2	51669.6	2	718	1258	1769	1074	1146	1464	1132	1377	1565	1685	1622	1969	712	797	890	700	836	1014	1748	1320	919	877
P00393	NADH dehydrogenase OS=Escherichia coli (strain K12) GN=ndh PE=1 SV=2	ndh	18	1368.88	47310.6	2	662	1172	773	236	304	437	444	561	654	331	334	359	703	798	935	1153	885	1495	364	365	412	1132
P45464	Penicillin-binding protein activator LpoA OS=Escherichia coli (strain K12) GN=lpoA PE=1 SV=1	lpoA	18	887.8	72762	2	490	757	687	306	430	463	483	482	397	344	313	265	229	207	488	395	465	395	403	340	445	451
P77243	2-methylcitrate dehydratase OS=Escherichia coli (strain K12) GN=prpD PE=1 SV=3	prpD	17	1152.39	53899.5	2	93	181	126	120	590	240	71	91	91	1893	2188	1528	76	85	103	128	107	143	148	887	171	146
P76578	Uncharacterized lipoprotein yfhM OS=Escherichia coli (strain K12) GN=yfhM PE=4 SV=1	yfhM	17	867.54	181455	2	29	60	49	53	57	57	49	60	66	67	65	78	37	43	28	25	32	41	49	32	42	36
P0ABT2	DNA protection during starvation protein OS=Escherichia coli (strain K12) GN=dps PE=1 SV=2	dps	17	1282.41	18665.7	2	4698	10435	5517	9277	6790	9014	6462	4170	4273	5031	5467	5147	78517	70522	3548	4647	21474	2608	6775	4164	4474	4999
P0AB24	UPF0409 protein ycdO OS=Escherichia coli (strain K12) GN=ycdO PE=1 SV=1	efeO	17	1111.47	41094	2	636	426	1303	284	337	689	250	263	712	476	294	239	2209	2282	3799	1269	2819	1602	367	300	521	567
P08506	D-alanyl-D-alanine carboxypeptidase dacC OS=Escherichia coli (strain K12) GN=dacC PE=1 SV=2	dacC	17	1255.29	43563.3	2	988	956	780	1028	1270	1003	1766	1735	1039	1025	1192	1293	871	750	828	1898	1123	1171	1506	1310	1244	1540
P0AEP3	UTP--glucose-1-phosphate uridylyltransferase OS=Escherichia coli (strain K12) GN=galU PE=1 SV=2	galU	17	842.42	32903	2	1619	2449	2237	1074	1360	1532	1632	1041	1517	1221	1288	1033	1457	1404	2505	2816	2606	1999	1294	1272	1246	1654
P0A715	2-dehydro-3-deoxyphosphooctonate aldolase OS=Escherichia coli (strain K12) GN=kdsA PE=1 SV=1	kdsA	17	1242.72	30794.9	2	2645	4123	3970	2683	2925	2806	3208	2474	3324	2661	2047	1670	1859	1762	3506	4239	2872	2965	2059	2318	2388	2882
P0A7I4	Peptide chain release factor 3 OS=Escherichia coli (strain K12) GN=prfC PE=1 SV=2	prfC	17	1102.69	59518.3	2	825	1380	1459	402	457	465	503	474	431	288	238	221	174	189	464	737	549	473	423	282	513	609
P0A7V8	30S ribosomal protein S4 OS=Escherichia coli (strain K12) GN=rpsD PE=1 SV=2	rpsD	17	1105.06	23436.6	2	13608	35055	21596	6650	10358	12616	13327	10328	15691	10430	7910	6843	4678	4570	9019	15006	10238	13533	11641	7219	10552	15457
P02359	30S ribosomal protein S7 OS=Escherichia coli (strain K12) GN=rpsG PE=1 SV=3	rpsG	17	1287.47	19988.7	2	54022	136334	78873	22645	33375	37005	37345	29262	33810	24753	17001	14891	16942	16992	40197	39602	35330	43215	36240	19367	34069	44052
P23830	CDP-diacylglycerol--serine O-phosphatidyltransferase OS=Escherichia coli (strain K12) GN=pssA PE=1 SV=2	pssA	17	1149.61	52750.8	2	296	730	350	283	395	414	387	458	583	645	558	671	153	191	176	241	233	264	395	327	418	402
P06129	Vitamin B12 transporter BtuB OS=Escherichia coli (strain K12) GN=btuB PE=1 SV=2	btuB	17	1177.07	68347.4	2	676	832	1072	436	506	582	503	489	426	334	262	229	246	327	509	250	475	499	450	258	507	522
P0A9T0	D-3-phosphoglycerate dehydrogenase OS=Escherichia coli (strain K12) GN=serA PE=1 SV=2	serA	17	954.62	44130	2	11353	910	2080	4662	4871	7542	6065	6099	9689	6093	4135	3349	5474	6439	10969	10294	14109	11906	3009	4104	4325	7682
P0A991	Fructose-bisphosphate aldolase class 1 OS=Escherichia coli (strain K12) GN=fbaB PE=1 SV=2	fbaB	17	1340.07	38067.2	2	2160	1182	1336	4226	4258	3387	3371	3285	3597	3702	4219	4572	3886	4514	4193	4279	6530	2779	4288	4516	3770	2484
P52697	6-phosphogluconolactonase OS=Escherichia coli (strain K12) GN=pgl PE=1 SV=2	pgl	17	956.95	36266.9	2	1802	2203	2845	2924	3091	2194	3349	1775	3263	3048	3490	3275	4134	4101	5719	3523	6493	3014	2635	4657	2455	2488
P33221	Phosphoribosylglycinamide formyltransferase 2 OS=Escherichia coli (strain K12) GN=purT PE=1 SV=3	purT	17	1168.48	42389	2	2379	363	1290	733	1262	1695	1424	2360	1416	921	748	537	671	667	1677	2229	1647	1507	1426	1254	1239	1370
P0A9Q9	Aspartate-semialdehyde dehydrogenase OS=Escherichia coli (strain K12) GN=asd PE=1 SV=1	asd	17	1106.4	39974.5	2	13769	3849	6746	8323	5886	6186	8940	8246	7967	4932	3578	2576	4815	5090	12037	12167	15966	10346	5858	4657	6188	10792
P22256	4-aminobutyrate aminotransferase OS=Escherichia coli (strain K12) GN=gabT PE=1 SV=1	gabT	17	1134.9	45727.5	2	599	945	1637	1061	1288	1674	1295	1524	1637	1737	1837	1548	365	398	604	499	681	751	1377	1471	873	902
P18956	Gamma-glutamyltranspeptidase OS=Escherichia coli (strain K12) GN=ggt PE=1 SV=1	ggt	17	640.15	61711.2	2	172	269	363	153	328	283	279	213	207	209	185	157	162	114	184	90	103	130	210	211	220	145
P21165	Xaa-Pro dipeptidase OS=Escherichia coli (strain K12) GN=pepQ PE=1 SV=2	pepQ	17	1425.59	50126.3	2	1239	1877	1967	1083	1346	1476	1364	1279	1333	1232	1153	908	565	544	1146	1791	1240	1303	1666	1471	1469	1432
P07004	Gamma-glutamyl phosphate reductase OS=Escherichia coli (strain K12) GN=proA PE=1 SV=2	proA	17	1174.47	44584.2	2	944	1214	990	686	742	786	950	798	931	856	805	757	589	524	902	1316	1114	1036	795	921	820	1067
P0A7B5	Glutamate 5-kinase OS=Escherichia coli (strain K12) GN=proB PE=1 SV=1	proB	17	1109.06	39014.5	2	680	812	519	435	477	485	551	599	627	565	467	414	201	218	375	800	574	708	613	386	503	705
P0AEZ3	Septum site-determining protein minD OS=Escherichia coli (strain K12) GN=minD PE=1 SV=2	minD	17	923.43	29577.6	2	2776	4928	4986	2638	2706	3019	2741	3301	2902	2669	2558	2368	1305	1349	2899	3592	2945	3135	2700	2152	2363	2573
P77735	Uncharacterized oxidoreductase YajO OS=Escherichia coli (strain K12) GN=yajO PE=3 SV=2	yajO	17	981.38	36379.5	2	465	357	371	547	632	583	577	420	426	472	523	669	718	582	761	505	760	407	606	625	426	423
P0ABJ1	Ubiquinol oxidase subunit 2 OS=Escherichia coli (strain K12) GN=cyoA PE=1 SV=1	cyoA	17	820.49	34870.6	2	2616	7655	4784	2103	2430	2176	2206	4384	3405	2227	1718	1844	829	865	1720	1866	2242	2580	2129	887	2496	2755
P19926	Glucose-1-phosphatase OS=Escherichia coli (strain K12) GN=agp PE=1 SV=1	agp	17	911.69	45635.9	2	501	1367	778	1380	1245	952	849	909	1232	1588	1871	2131	1181	1264	529	900	692	647	1239	1592	953	909
P33136	Glucans biosynthesis protein G OS=Escherichia coli (strain K12) GN=mdoG PE=1 SV=1	mdoG	17	948.77	57858.1	2	993	1265	1047	555	829	752	929	783	971	735	676	595	473	428	696	1129	901	879	848	629	789	1050
P0AE78	Magnesium and cobalt efflux protein CorC OS=Escherichia coli (strain K12) GN=corC PE=3 SV=1	corC	17	870.67	33259.5	2	215	363	321	349	367	286	331	325	415	364	310	227	188	293	458	357	539	384	255	336	311	359
P23836	Transcriptional regulatory protein phoP OS=Escherichia coli (strain K12) GN=phoP PE=1 SV=1	phoP	16	1055.77	25501.3	2	2967	3132	4532	2950	3085	3154	2952	2265	2704	2799	2430	1880	1253	1269	3587	2702	3197	3389	3039	2333	3020	2937
P0ABD3	Bacterioferritin OS=Escherichia coli (strain K12) GN=bfr PE=1 SV=1	bfr	16	952.42	18465.3	2	3413	3039	2966	8229	8092	6902	5651	2959	5056	7681	9245	12499	2799	2934	1587	3777	4383	2178	7469	9742	4798	2946
P09372	Protein grpE OS=Escherichia coli (strain K12) GN=grpE PE=1 SV=1	grpE	16	962.49	21766.2	2	5905	16830	11252	4235	5148	5976	5886	4546	4972	3835	3380	2730	6164	6107	8277	13012	9141	4941	5053	3505	4762	5774
P0ACC7	Bifunctional protein glmU OS=Escherichia coli (strain K12) GN=glmU PE=1 SV=1	glmU	16	763.66	49141.6	2	409	804	685	266	306	279	426	352	502	335	282	209	245	316	454	500	429	536	320	257	359	533
P77239	Cation efflux system protein CusB OS=Escherichia coli (strain K12) GN=cusB PE=1 SV=1	cusB	16	983.26	44259.2	2	2333	385	291	1923	2791	617	3262	1330	1313	1124	758	646	353	280	433	2287	1588	1705	2391	1916	2711	3822
P60438	50S ribosomal protein L3 OS=Escherichia coli (strain K12) GN=rplC PE=1 SV=1	rplC	16	1141.88	22211.8	2	16502	40858	27954	8089	11343	12676	13860	9931	12167	8673	7189	5615	7816	6987	13923	18683	14961	15111	11705	8345	12407	17615
P62620	4-hydroxy-3-methylbut-2-en-1-yl diphosphate synthase OS=Escherichia coli (strain K12) GN=ispG PE=1 SV=1	ispG	16	861.29	40640.4	2	590	969	837	357	382	412	455	400	328	300	260	225	147	49	309	520	319	420	311	222	321	393
P18133	Nicotinate phosphoribosyltransferase OS=Escherichia coli (strain K12) GN=pncB PE=1 SV=3	pncB	16	863.38	45850.3	2	593	365	680	368	495	523	564	562	480	370	306	260	57	43	457	522	493	544	416	360	470	517
Q46829	6-phospho-beta-glucosidase BglA OS=Escherichia coli (strain K12) GN=bglA PE=3 SV=2	bglA	16	707.14	55306.8	2	369	485	526	276	353	393	370	399	275	229	214	182	179	153	337	431	378	378	278	296	288	310
P07650	Thymidine phosphorylase OS=Escherichia coli (strain K12) GN=deoA PE=1 SV=3	deoA	16	1052.13	47159	2	135	1556	127	95	127	151	93	122	104	116	118	135	202	218	290	212	273	183	144	123	135	123
P12758	Uridine phosphorylase OS=Escherichia coli (strain K12) GN=udp PE=1 SV=3	udp	16	1312.76	27123.8	2	1726	27495	3289	3105	3722	3026	3259	2631	3980	4686	5490	6198	3523	3066	3167	4376	3963	2532	2507	3268	2634	2445
P0A8F0	Uracil phosphoribosyltransferase OS=Escherichia coli (strain K12) GN=upp PE=1 SV=1	upp	16	963.26	22501	2	23305	16450	12778	11467	21550	16914	21630	13438	16252	9966	7016	5856	6830	8739	18001	13089	15042	17597	18710	14410	25934	20059
P0A717	Ribose-phosphate pyrophosphokinase OS=Escherichia coli (strain K12) GN=prs PE=1 SV=2	prs	16	1269.75	34178.7	2	7428	9372	11357	5519	8365	7813	7879	7821	6874	4850	3549	3160	3241	3968	6920	7408	8818	7542	6539	5139	9774	8800
P23908	Acetylornithine deacetylase OS=Escherichia coli (strain K12) GN=argE PE=1 SV=2	argE	16	1388.14	42302.5	2	2145	326	569	800	911	962	1378	1329	1307	775	850	958	971	1054	2625	2208	2482	1535	1177	1319	925	1833
P0AC38	Aspartate ammonia-lyase OS=Escherichia coli (strain K12) GN=aspA PE=1 SV=1	aspA	16	1119.52	52304.5	2	110	5578	2988	780	886	377	447	551	819	809	591	602	457	495	110	122	99	263	676	318	785	220
P0A9D8	2,3,4,5-tetrahydropyridine-2,6-dicarboxylate N-succinyltransferase OS=Escherichia coli (strain K12) GN=dapD PE=1 SV=1	dapD	16	1414.34	29855.4	2	10996	8342	7288	4577	4798	5689	7306	6905	5803	4362	3663	2585	3659	3657	9312	15881	11826	9708	6848	4061	4962	10131
P60757	ATP phosphoribosyltransferase OS=Escherichia coli (strain K12) GN=hisG PE=1 SV=1	hisG	16	941.56	33327.4	2	4025	504	4683	1005	1635	1670	2818	1695	1974	1649	1511	1092	462	537	1867	3235	2213	2781	2499	1692	1992	3004
P15288	Aminoacyl-histidine dipeptidase OS=Escherichia coli (strain K12) GN=pepD PE=1 SV=3	pepD	16	1036.43	52864.1	2	2408	5961	4480	2837	2804	2659	2874	2563	2703	2433	2052	1647	2079	2243	3714	3628	4322	4083	3022	2407	2950	3522
P15034	Xaa-Pro aminopeptidase OS=Escherichia coli (strain K12) GN=pepP PE=1 SV=2	pepP	16	1073.11	49766.1	2	617	973	616	694	806	591	740	751	813	741	712	599	466	305	636	579	507	630	755	840	721	609
P00893	Acetolactate synthase isozyme 3 large subunit OS=Escherichia coli (strain K12) GN=ilvI PE=1 SV=2	ilvI	16	792.09	62926	2	441	114	107	307	343	406	472	462	452	413	359	284	222	248	369	405	424	448	363	278	305	443
P0AEU0	Histidine-binding periplasmic protein OS=Escherichia coli (strain K12) GN=hisJ PE=1 SV=1	hisJ	16	1112.16	28447.6	2	10759	3332	5038	4228	6094	7981	6560	7715	7385	7457	6222	5668	3539	4578	9530	10382	8326	5753	7499	6330	6514	7890
P0A6A3	Acetate kinase OS=Escherichia coli (strain K12) GN=ackA PE=1 SV=1	ackA	16	1176.04	43245.1	2	3062	8612	3954	1458	2395	2066	2587	8277	2006	2019	2028	1992	2326	2094	2919	3368	3790	5005	3685	2982	3424	4780
P05042	Fumarate hydratase class II OS=Escherichia coli (strain K12) GN=fumC PE=1 SV=1	fumC	16	1328.8	50438.7	2	498	996	938	958	1092	1770	567	612	1358	1649	1693	2220	280	281	415	324	553	427	1271	2032	943	670
P0ABA6	ATP synthase gamma chain OS=Escherichia coli (strain K12) GN=atpG PE=1 SV=1	atpG	16	878.86	31539.3	2	2307	3812	4604	1640	2288	2261	2414	2779	2450	1823	1413	1075	849	792	1172	1472	1086	2089	2141	1553	2212	2250
P32176	Formate dehydrogenase-O major subunit OS=Escherichia coli (strain K12) GN=fdoG PE=1 SV=5	fdoG	16	1159.21	112549	2	13	2034	25	15	15	13	8	17	14	15	11	11	4	5	11	16	14	15	15	10	13	20
P76177	Protein ydgH OS=Escherichia coli (strain K12) GN=ydgH PE=1 SV=1	ydgH	16	1186.15	33864.5	2	2729	2669	2633	1567	2205	2792	2437	2397	2174	2031	1802	1382	1248	664	2468	2674	2972	2601	2374	1911	2176	3047
P45578	S-ribosylhomocysteine lyase OS=Escherichia coli (strain K12) GN=luxS PE=1 SV=3	luxS	15	1179.02	19385.6	2	6890	5305	6094	5305	5370	6384	6922	5630	5066	4092	3895	3080	7973	7518	14458	14013	17462	7915	6634	6199	5412	7669
P0A8W8	UPF0304 protein yfbU OS=Escherichia coli (strain K12) GN=yfbU PE=1 SV=1	yfbU	15	804.24	19505.5	2	1232	1387	1702	858	1122	1585	1766	1056	1270	990	933	833	1185	1043	1490	2663	2225	1873	1323	1444	1184	1785
Q46857	2,5-diketo-D-gluconic acid reductase A OS=Escherichia coli (strain K12) GN=dkgA PE=1 SV=3	dkgA	15	941.04	31072.2	2	328	735	453	321	355	445	468	263	467	325	359	412	1326	1316	868	645	649	418	207	461	203	392
P39342	Uncharacterized protein yjgR OS=Escherichia coli (strain K12) GN=yjgR PE=1 SV=1	yjgR	15	895.75	54280.4	2	174	118	173	154	218	188	227	169	178	189	192	259	193	242	180	232	276	162	220	277	212	136
P28635	D-methionine-binding lipoprotein metQ OS=Escherichia coli (strain K12) GN=metQ PE=1 SV=2	metQ	15	1245.36	29395.5	2	29884	3958	10224	12300	16943	21540	22397	18443	17035	15841	13967	14390	18267	15682	25696	14488	26076	23398	18142	15332	17992	21038
P0AAB6	UTP--glucose-1-phosphate uridylyltransferase OS=Escherichia coli (strain K12) GN=galF PE=1 SV=1	galF	15	1212.7	32790.1	2	4865	4890	4704	2677	3781	3784	3787	3081	3272	2331	1975	1577	2109	2293	4445	4177	3947	4710	3514	2668	3775	4556
P0A749	UDP-N-acetylglucosamine 1-carboxyvinyltransferase OS=Escherichia coli (strain K12) GN=murA PE=1 SV=1	murA	15	689.16	44771.5	2	650	1266	1271	354	408	598	642	534	524	434	350	311	184	133	548	478	423	551	371	353	411	539
P37759	dTDP-glucose 4,6-dehydratase 1 OS=Escherichia coli (strain K12) GN=rfbB PE=3 SV=2	rfbB	15	1031.33	40515.3	2	1009	2504	1894	549	631	617	695	543	582	378	269	213	250	208	686	656	626	783	575	322	670	894
P0A7G6	Protein recA OS=Escherichia coli (strain K12) GN=recA PE=1 SV=2	recA	15	1090.72	37931.6	2	1514	3139	3467	1138	1741	1932	1919	1743	2329	2157	1779	1516	583	626	1340	2183	1254	1750	1739	1463	1754	1750
P15042	DNA ligase OS=Escherichia coli (strain K12) GN=ligA PE=1 SV=2	ligA	15	994.06	73542.3	2	290	647	643	215	304	346	307	239	320	256	213	212	168	120	230	350	294	371	359	259	389	437
P21507	ATP-dependent RNA helicase srmB OS=Escherichia coli (strain K12) GN=srmB PE=1 SV=1	srmB	15	929.27	49865.5	2	301	719	385	287	307	320	314	279	531	475	441	424	141	142	206	352	276	284	336	196	268	381
P07604	Transcriptional regulatory protein tyrR OS=Escherichia coli (strain K12) GN=tyrR PE=1 SV=2	tyrR	15	859.27	57601.7	2	132	225	144	76	119	135	154	133	222	164	151	142	62	58	122	133	142	141	97	96	81	131
P0AE18	Methionine aminopeptidase OS=Escherichia coli (strain K12) GN=map PE=1 SV=1	map	15	729.78	29293.9	2	1479	2077	2128	1055	1216	1321	1324	1098	1106	907	732	630	1191	1244	2786	1866	2871	2034	1215	1028	1291	1629
P0A7W1	30S ribosomal protein S5 OS=Escherichia coli (strain K12) GN=rpsE PE=1 SV=2	rpsE	15	1066.45	17574.3	2	18042	49612	35630	8213	12377	15648	15684	11107	14055	8955	7238	6497	6753	7025	10923	18247	15377	15393	11498	7900	12453	18413
P02358	30S ribosomal protein S6 OS=Escherichia coli (strain K12) GN=rpsF PE=1 SV=1	rpsF	15	1363.78	15675.6	2	17452	42242	29319	8724	10379	11938	12148	10030	13163	8789	7068	5764	7861	8445	17827	16394	16203	14694	10543	7342	9913	13982
P0AEI1	(Dimethylallyl)adenosine tRNA methylthiotransferase miaB OS=Escherichia coli (strain K12) GN=miaB PE=1 SV=1	miaB	15	1270.05	53611.1	2	967	2315	1210	314	597	513	604	473	487	351	263	249	171	134	218	506	153	427	484	345	649	684
P0AA39	Ribosomal large subunit pseudouridine synthase C OS=Escherichia coli (strain K12) GN=rluC PE=1 SV=1	rluC	15	573.1	35986.4	2	152	326	166	59	91	96	89	86	97	76	72	83	58	61	80	138	71	88	66	67	87	104
P0AGJ9	Tyrosyl-tRNA synthetase OS=Escherichia coli (strain K12) GN=tyrS PE=1 SV=2	tyrS	15	1058.75	47479.1	2	2277	3362	2875	1118	1261	1791	1609	1336	1610	1191	1109	914	971	1048	1989	3368	2112	2206	1498	1222	1459	2187
P0A6W9	Glutamate--cysteine ligase OS=Escherichia coli (strain K12) GN=gshA PE=1 SV=1	gshA	15	605.9	58214.3	2	550	611	528	335	381	391	424	370	324	332	302	254	192	183	514	488	583	400	352	338	325	394
P23893	Glutamate-1-semialdehyde 2,1-aminomutase OS=Escherichia coli (strain K12) GN=hemL PE=1 SV=2	hemL	15	812.05	45318.4	2	2909	3785	3661	1538	2183	2192	2541	2155	2125	1741	1446	1152	1030	1045	2561	3029	2631	2630	2047	1741	2068	2686
P0A887	Ubiquinone/menaquinone biosynthesis methyltransferase ubiE OS=Escherichia coli (strain K12) GN=ubiE PE=1 SV=1	ubiE	15	1039.44	28037.3	2	929	1739	1488	572	799	828	781	813	802	765	620	538	178	197	558	1013	647	756	680	601	839	836
P77488	1-deoxy-D-xylulose-5-phosphate synthase OS=Escherichia coli (strain K12) GN=dxs PE=1 SV=3	dxs	15	654.96	67555.8	2	298	697	433	210	325	317	303	308	327	302	262	256	145	79	151	249	143	219	292	224	319	297
P15877	Quinoprotein glucose dehydrogenase OS=Escherichia coli (strain K12) GN=gcd PE=1 SV=3	gcd	15	768.4	86673.8	2	43	85	37	28	24	87	22	18	76	63	85	107	223	366	224	62	338	78	33	37	27	36
P09424	Mannitol-1-phosphate 5-dehydrogenase OS=Escherichia coli (strain K12) GN=mtlD PE=1 SV=3	mtlD	15	915	41095.5	2	725	1459	1435	967	1000	929	1006	565	765	716	681	880	1602	1616	979	1205	1090	790	902	1033	853	733
P33570	Transketolase 2 OS=Escherichia coli (strain K12) GN=tktB PE=1 SV=1	tktB	15	1361.71	72978.8	2	754	379	500	962	913	934	923	629	887	935	1177	1474	1150	1227	975	1021	1621	654	971	1489	853	667
P13482	Periplasmic trehalase OS=Escherichia coli (strain K12) GN=treA PE=1 SV=1	treA	15	654.59	63578.5	2	66	70	86	146	202	131	134	106	108	153	196	276	187	188	108	70	129	54	138	174	120	56
P09323	PTS system N-acetylglucosamine-specific EIICBA component OS=Escherichia coli (strain K12) GN=nagE PE=4 SV=1	nagE	15	948.01	68284.9	2	266	1768	815	387	581	1831	545	665	1247	1623	1348	1432	145	172	98	297	157	285	927	1140	570	502
P15640	Phosphoribosylamine--glycine ligase OS=Escherichia coli (strain K12) GN=purD PE=1 SV=2	purD	15	1012.69	45893.1	2	2115	423	2132	802	1361	1721	1512	2081	1162	714	526	382	942	855	2205	2173	2339	1705	1490	800	1335	1885
P0A7E1	Dihydroorotate dehydrogenase OS=Escherichia coli (strain K12) GN=pyrD PE=1 SV=1	pyrD	15	1053.82	36733.4	2	1545	519	501	615	955	883	1027	704	970	496	307	236	479	479	1044	1100	1186	952	685	590	1062	1206
P00963	Aspartate--ammonia ligase OS=Escherichia coli (strain K12) GN=asnA PE=1 SV=1	asnA	15	1013.7	36609.8	2	1766	601	27652	535	581	712	830	1030	1051	579	347	186	81	77	937	701	874	922	810	363	587	1230
P04036	Dihydrodipicolinate reductase OS=Escherichia coli (strain K12) GN=dapB PE=1 SV=1	dapB	15	1303.15	28720.6	2	3082	2525	1729	1619	1223	1653	1753	1654	1467	1088	977	852	2435	2469	2666	4077	3942	2035	1549	1068	1115	2282
P04968	Threonine dehydratase biosynthetic OS=Escherichia coli (strain K12) GN=ilvA PE=1 SV=1	ilvA	15	722.58	56141.7	2	140	98	97	62	93	148	100	150	143	98	79	59	70	50	244	214	188	230	104	79	107	168
P04693	Aromatic-amino-acid aminotransferase OS=Escherichia coli (strain K12) GN=tyrB PE=1 SV=1	tyrB	15	1018.46	43492.1	2	1770	895	1209	1566	1500	1548	1376	1719	1499	1386	1008	613	269	273	1542	1494	2404	1909	1658	1194	1773	2106
P0AEQ3	Glutamine-binding periplasmic protein OS=Escherichia coli (strain K12) GN=glnH PE=1 SV=1	glnH	15	879.41	27155.2	2	6759	5618	9587	6784	13170	10571	10621	13815	10760	12194	10291	9544	4209	3662	5608	8436	5242	5215	14563	10772	14394	7865
P07001	NAD(P) transhydrogenase subunit alpha OS=Escherichia coli (strain K12) GN=pntA PE=1 SV=2	pntA	15	876.92	54570.5	2	1938	895	683	598	878	1675	1349	1412	2667	1959	1479	1115	768	809	1205	2401	1402	1698	1283	790	1227	2877
P0AB67	NAD(P) transhydrogenase subunit beta OS=Escherichia coli (strain K12) GN=pntB PE=1 SV=1	pntB	15	925.02	48673.5	2	2977	1461	1029	835	1351	2472	2158	1747	3721	2534	2207	1713	1164	1088	1549	3677	2007	2363	2114	958	1415	3580
P37666	Glyoxylate/hydroxypyruvate reductase B OS=Escherichia coli (strain K12) GN=ghrB PE=1 SV=3	ghrB	15	627.56	35355.1	2	1788	1289	1547	852	955	1211	1156	1395	1243	789	636	392	601	628	2284	1661	1828	1988	1525	1050	1136	1676
P76658	Bifunctional protein hldE OS=Escherichia coli (strain K12) GN=hldE PE=1 SV=1	hldE	15	796.52	51000.7	2	802	1349	1139	424	645	618	741	707	576	523	470	417	423	397	539	934	579	839	751	620	667	824
P31224	Acriflavine resistance protein B OS=Escherichia coli (strain K12) GN=acrB PE=1 SV=1	acrB	14	655.93	113483	2	282	643	378	212	243	347	304	309	391	330	304	296	361	361	263	406	395	329	241	172	250	403
P0A855	Protein tolB OS=Escherichia coli (strain K12) GN=tolB PE=1 SV=1	tolB	14	1048.06	45909.2	2	1690	1404	2148	869	1136	1509	1265	1222	1334	1148	918	783	1396	1224	2072	2410	2741	1475	1039	919	1047	1404
P0ACJ8	Catabolite gene activator OS=Escherichia coli (strain K12) GN=crp PE=1 SV=1	crp	14	816.9	23607.4	2	2048	3450	3525	2421	3247	3184	2655	3776	2868	2506	2653	2880	869	1712	2435	2631	3128	2364	2536	3197	3459	2397
P29217	UPF0502 protein yceH OS=Escherichia coli (strain K12) GN=yceH PE=1 SV=3	yceH	14	885.12	24144.2	2	858	1137	902	733	660	731	817	730	788	630	538	447	694	653	898	977	901	865	809	736	636	863
P30871	Uncharacterized protein ygiF OS=Escherichia coli (strain K12) GN=ygiF PE=4 SV=1	ygiF	14	699.13	48340.9	2	287	303	334	201	239	284	299	289	334	297	254	217	91	101	191	417	275	319	272	232	260	353
P63389	Uncharacterized ABC transporter ATP-binding protein YheS OS=Escherichia coli (strain K12) GN=yheS PE=1 SV=1	yheS	14	511.66	71781	2	56	137	103	35	53	60	50	45	77	50	45	38	17	21	34	87	37	41	39	19	31	51
P04335	Esterase frsA OS=Escherichia coli (strain K12) GN=frsA PE=3 SV=2	frsA	14	810.11	46960.6	2	248	271	173	165	156	199	186	183	170	139	139	115	135	88	207	332	279	222	172	164	128	194
P37329	Molybdate-binding periplasmic protein OS=Escherichia coli (strain K12) GN=modA PE=1 SV=1	modA	14	815.75	27329.3	2	757	1058	1227	605	1031	712	995	806	1330	9101	9212	8075	366	471	662	833	879	621	840	811	793	841
P0AE08	Alkyl hydroperoxide reductase subunit C OS=Escherichia coli (strain K12) GN=ahpC PE=1 SV=2	ahpC	14	1193.7	20730.4	2	58487	77834	71075	56567	57308	74767	57080	54778	52017	51146	46848	36229	6524	5723	73780	85208	75592	66271	59399	43106	50610	64362
P0AE52	Putative peroxiredoxin bcp OS=Escherichia coli (strain K12) GN=bcp PE=1 SV=1	bcp	14	862.95	17604.7	2	7595	7717	8689	3520	5109	5791	6662	6910	4919	3941	3373	2465	3802	3601	8639	7540	7854	7392	5294	4041	4950	7583
P0A6Z1	Chaperone protein hscA OS=Escherichia coli (strain K12) GN=hscA PE=1 SV=1	hscA	14	1176.24	65594	2	587	1040	821	269	315	313	425	307	364	256	173	137	102	105	479	790	393	588	356	227	324	475
P0ACA3	Stringent starvation protein A OS=Escherichia coli (strain K12) GN=sspA PE=1 SV=2	sspA	14	841.44	24271.4	2	4718	8208	5714	3173	3915	4024	4210	3805	3402	2675	2417	2149	2855	3063	5539	5011	5602	4631	4274	3401	4271	4815
P0A9P4	Thioredoxin reductase OS=Escherichia coli (strain K12) GN=trxB PE=1 SV=2	trxB	14	1168.46	34583.4	2	4439	5509	5014	2115	2561	3082	2845	3365	2679	1976	1665	1288	1348	1454	4304	4942	4305	3505	2859	2028	2575	3607
P39099	Protease degQ OS=Escherichia coli (strain K12) GN=degQ PE=1 SV=1	degQ	14	900.95	47158.1	2	846	848	940	702	895	859	1133	1038	892	951	829	814	519	529	744	813	794	838	1211	984	902	958
P0AEB2	D-alanyl-D-alanine carboxypeptidase dacA OS=Escherichia coli (strain K12) GN=dacA PE=1 SV=1	dacA	14	1031.63	44397.7	2	1349	1960	1607	614	848	881	1111	1007	897	635	509	467	700	591	1092	1393	1244	1220	907	629	864	1188
P0AGC3	Soluble lytic murein transglycosylase OS=Escherichia coli (strain K12) GN=slt PE=1 SV=1	slt	14	665.25	73288.8	2	80	89	70	72	97	60	110	103	59	57	55	66	65	50	96	83	62	84	87	75	74	72
P0A9P6	Cold-shock DEAD box protein A OS=Escherichia coli (strain K12) GN=deaD PE=1 SV=2	deaD	14	904.39	70484.6	2	560	1899	800	155	257	294	315	209	470	289	187	119	32	46	230	245	180	299	280	154	280	479
P06993	HTH-type transcriptional regulator malT OS=Escherichia coli (strain K12) GN=malT PE=1 SV=2	malT	14	908.69	103036	2	21	75	47	24	47	62	43	43	197	196	158	107	11	11	13	12	12	12	66	20	44	43
P0AFG0	Transcription antitermination protein nusG OS=Escherichia coli (strain K12) GN=nusG PE=1 SV=2	nusG	14	989.08	20500.5	2	3934	6938	4984	2575	2888	3464	2964	3187	2840	2431	2255	1717	2048	1909	3523	4145	4072	3689	3473	2408	3223	3673
P00579	RNA polymerase sigma factor rpoD OS=Escherichia coli (strain K12) GN=rpoD PE=1 SV=2	rpoD	14	805.15	70201.2	2	648	1657	975	435	602	622	591	602	737	557	494	519	461	457	546	947	718	696	498	372	564	608
P07012	Peptide chain release factor 2 OS=Escherichia coli (strain K12) GN=prfB PE=1 SV=3	prfB	14	885.4	41207.3	2	1682	2892	2808	1143	1278	1354	1363	1115	1368	1123	885	680	800	889	1864	1729	1815	1776	1323	941	1256	1572
P0ABU2	GTP-dependent nucleic acid-binding protein engD OS=Escherichia coli (strain K12) GN=engD PE=1 SV=2	ychF	14	830.86	39624.3	2	2762	4454	4763	915	1573	1837	2133	1685	1753	1258	1065	720	632	564	1892	2222	1801	2000	1667	1054	1653	2112
P0A6R0	3-oxoacyl-[acyl-carrier-protein] synthase 3 OS=Escherichia coli (strain K12) GN=fabH PE=1 SV=1	fabH	14	940.88	33476	2	2120	3559	3122	1481	1677	1780	1894	1952	1454	1377	1244	1097	872	779	1507	1643	2094	1643	1374	1165	1219	1579
P77718	tRNA sulfurtransferase OS=Escherichia coli (strain K12) GN=thiI PE=1 SV=1	thiI	14	803.62	54920.7	2	198	537	278	83	106	156	118	104	216	131	117	75	60	48	146	250	160	196	148	81	142	269
P0A9C3	Aldose 1-epimerase OS=Escherichia coli (strain K12) GN=galM PE=1 SV=1	galM	14	986.82	38148.8	2	1240	2363	2130	1130	1243	1424	1459	1068	1167	1110	1001	837	816	783	1797	2684	1415	1355	1388	3098	1265	1279
P62707	2,3-bisphosphoglycerate-dependent phosphoglycerate mutase OS=Escherichia coli (strain K12) GN=gpmA PE=1 SV=2	gpmA	14	994.9	28520.7	2	12056	17793	15522	10381	10626	12452	10895	9316	8972	8719	8277	7994	13828	14928	20937	16501	23776	14826	10334	9065	9527	11013
P0AF96	Uncharacterized protein yjgK OS=Escherichia coli (strain K12) GN=yjgK PE=1 SV=1	tabA	14	865.89	16836.6	2	15854	12656	16607	17332	14192	13421	16864	11933	16590	15400	14748	10361	7716	8000	17347	16795	22276	19024	16832	11323	14352	17078
P0A6L0	Deoxyribose-phosphate aldolase OS=Escherichia coli (strain K12) GN=deoC PE=1 SV=1	deoC	14	1067.44	27698.3	2	1162	7170	1292	855	822	1085	837	781	886	799	809	894	3582	3142	2263	2024	2753	1457	907	873	703	921
P0A7D7	Phosphoribosylaminoimidazole-succinocarboxamide synthase OS=Escherichia coli (strain K12) GN=purC PE=1 SV=1	purC	14	1044.81	26959.7	2	8188	1498	7667	4918	6718	7162	7056	8675	6902	4804	3610	2828	5028	4964	11080	8893	13138	9074	6301	4692	6454	7297
P25524	Cytosine deaminase OS=Escherichia coli (strain K12) GN=codA PE=1 SV=3	codA	14	1354.11	47543.2	2	3065	691	1068	1422	2948	2286	2921	2208	2811	1638	1098	844	833	907	1827	2048	2052	2173	2034	1482	3621	2963
P00888	Phospho-2-dehydro-3-deoxyheptonate aldolase, Tyr-sensitive OS=Escherichia coli (strain K12) GN=aroF PE=1 SV=1	aroF	14	1212.09	38761.4	2	2076	454	411	1423	1042	1096	1980	4245	1231	678	459	354	124	83	633	159	465	327	1035	1114	1289	3377
P27248	Aminomethyltransferase OS=Escherichia coli (strain K12) GN=gcvT PE=1 SV=3	gcvT	14	884.86	40103.2	2	662	2199	2091	251	426	563	492	304	405	200	170	135	264	245	462	580	561	395	374	255	420	563
P0A877	Tryptophan synthase alpha chain OS=Escherichia coli (strain K12) GN=trpA PE=1 SV=1	trpA	14	879.27	28688	2	4387	1705	1516	2383	2537	3346	3797	3399	3625	2960	2350	1823	1129	1082	3857	4067	3007	3178	2699	2617	2359	3863
P0A6F1	Carbamoyl-phosphate synthase small chain OS=Escherichia coli (strain K12) GN=carA PE=1 SV=1	carA	14	1420.06	41387.1	2	9256	792	722	2961	4954	4691	5822	3994	4855	2682	1858	1499	3104	2625	5838	8529	7222	5980	4198	3449	5537	7524
P04816	Leucine-specific-binding protein OS=Escherichia coli (strain K12) GN=livK PE=1 SV=2	livK	14	890.76	39335.9	2	2647	391	991	1108	2514	2701	2329	1837	2334	2206	1791	1214	771	1069	2447	2770	1882	1874	1967	1698	2396	2313
P0ADF6	Phosphogluconate dehydratase OS=Escherichia coli (strain K12) GN=edd PE=2 SV=1	edd	14	977.14	64579.8	1	81	109	NA	31	46	1988	42	35	35	39	31	22	63	33	69	74	63	NA	NA	25	26	NA
P0ABH0	Cell division protein ftsA OS=Escherichia coli (strain K12) GN=ftsA PE=3 SV=1	ftsA	14	672.86	45283.5	2	572	792	734	579	526	445	543	540	603	518	449	402	198	222	501	780	618	634	488	389	449	564
P0A9C0	Anaerobic glycerol-3-phosphate dehydrogenase subunit A OS=Escherichia coli (strain K12) GN=glpA PE=1 SV=1	glpA	14	681.29	58903.4	2	14	463	471	15	16	16	476	19	29	17	20	10	36	30	55	24	22	38	16	23	16	11
P08957	Type I restriction enzyme EcoKI M protein OS=Escherichia coli (strain K12) GN=hsdM PE=1 SV=1	hsdM	13	1011.42	59251.5	2	346	768	497	105	201	216	226	197	184	129	96	80	58	92	180	382	192	241	171	122	224	276
P10121	Cell division protein ftsY OS=Escherichia coli (strain K12) GN=ftsY PE=1 SV=1	ftsY	13	856.81	54461.9	2	1149	1803	1567	690	787	925	898	879	845	904	686	719	538	647	1250	1037	992	875	919	670	723	889
P11557	Protein damX OS=Escherichia coli (strain K12) GN=damX PE=1 SV=2	damX	13	790	46116.3	2	911	1194	1091	531	638	773	658	618	602	519	475	488	873	615	1353	1387	1236	803	617	627	553	712
P0A8M6	UPF0265 protein yeeX OS=Escherichia coli (strain K12) GN=yeeX PE=3 SV=1	yeeX	13	1046.5	12751.7	2	20277	15122	17534	10290	10542	15053	16560	9829	15333	11557	10540	9878	9538	10559	20902	21871	18046	25008	16261	12231	10770	25654
P23839	UPF0701 protein yicC OS=Escherichia coli (strain K12) GN=yicC PE=1 SV=2	yicC	13	681.74	33136.3	2	710	963	853	635	781	656	750	783	748	634	586	571	444	419	695	754	824	718	593	686	733	769
P0A9U3	Uncharacterized ABC transporter ATP-binding protein YbiT OS=Escherichia coli (strain K12) GN=ybiT PE=1 SV=1	ybiT	13	648.53	59802.3	2	343	737	381	137	182	206	206	161	196	159	124	96	96	100	174	227	169	227	205	127	193	285
P0A8E1	UPF0227 protein ycfP OS=Escherichia coli (strain K12) GN=ycfP PE=3 SV=1	ycfP	13	541.76	21194.7	2	793	965	793	733	749	757	808	688	753	726	694	699	453	388	1226	1244	1617	899	843	912	757	765
P0A6P5	GTPase Der OS=Escherichia coli (strain K12) GN=der PE=1 SV=1	der	13	689.91	54983.5	2	267	369	289	182	161	182	168	193	349	264	234	196	82	77	114	183	206	188	163	121	122	232
P0ADV7	Probable phospholipid-binding protein mlaC OS=Escherichia coli (strain K12) GN=mlaC PE=1 SV=1	mlaC	13	552.74	23929.5	2	1567	2178	2248	801	1303	1680	1550	1325	1024	1031	984	870	1163	1011	1767	1791	1753	1399	1421	1539	1353	1391
P00448	Superoxide dismutase [Mn] OS=Escherichia coli (strain K12) GN=sodA PE=1 SV=2	sodA	13	839.37	23064.6	2	21660	27082	33717	24614	30246	24695	25317	22602	23528	20650	17327	15728	18208	18771	33132	19632	31614	26720	30605	25701	28643	28499
P08622	Chaperone protein dnaJ OS=Escherichia coli (strain K12) GN=dnaJ PE=1 SV=3	dnaJ	13	623.88	41056.5	2	688	2011	1493	494	756	720	742	589	667	582	451	366	651	475	664	1798	842	773	589	426	598	605
P0ABC3	Modulator of FtsH protease HflC OS=Escherichia coli (strain K12) GN=hflC PE=1 SV=1	hflC	13	853.85	37608.5	2	1290	2128	1473	725	1131	896	1410	1191	991	833	682	593	692	635	1068	1248	988	1312	1228	859	1046	1399
P76403	Uncharacterized protease yegQ OS=Escherichia coli (strain K12) GN=yegQ PE=3 SV=1	yegQ	13	605.28	51142.5	2	265	684	273	169	175	198	169	120	220	166	122	119	35	40	206	383	239	252	150	82	193	229
P09147	UDP-glucose 4-epimerase OS=Escherichia coli (strain K12) GN=galE PE=1 SV=1	galE	13	890.85	37223.6	2	621	1752	1436	526	632	773	606	649	547	643	549	451	325	289	615	438	384	523	748	5287	610	628
P37747	UDP-galactopyranose mutase OS=Escherichia coli (strain K12) GN=glf PE=1 SV=1	glf	13	570.69	42920.8	2	836	1590	1284	607	654	617	652	526	653	531	364	301	149	141	625	402	665	739	578	297	573	671
P77211	Cation efflux system protein CusC OS=Escherichia coli (strain K12) GN=cusC PE=1 SV=1	cusC	13	1003.52	50220.6	2	1475	605	389	1188	1554	466	1834	982	830	744	547	511	425	250	467	986	1343	1252	1346	1398	1594	1827
P0A8F8	UvrABC system protein B OS=Escherichia coli (strain K12) GN=uvrB PE=1 SV=2	uvrB	13	697.37	76160.4	2	134	158	128	113	122	131	141	112	135	134	150	156	145	133	162	191	173	184	153	150	134	119
P0ACQ4	Hydrogen peroxide-inducible genes activator OS=Escherichia coli (strain K12) GN=oxyR PE=1 SV=1	oxyR	13	827.5	34235.7	2	395	578	473	209	316	366	374	424	374	344	317	253	160	135	274	409	355	374	364	343	325	451
P0ACP7	HTH-type transcriptional repressor purR OS=Escherichia coli (strain K12) GN=purR PE=1 SV=2	purR	13	830.73	38132.2	2	826	645	918	546	744	767	672	791	851	796	680	699	370	333	514	1060	671	780	583	519	729	756
P0A8N5	Lysyl-tRNA synthetase, heat inducible OS=Escherichia coli (strain K12) GN=lysU PE=1 SV=2	lysU	13	1450.08	57772.1	2	493	2372	696	267	338	381	394	274	434	328	284	267	331	291	329	728	512	479	334	251	297	414
P0AG55	50S ribosomal protein L6 OS=Escherichia coli (strain K12) GN=rplF PE=1 SV=2	rplF	13	868.08	18874.2	2	18104	50099	33659	8547	13847	14031	16302	12044	15531	10364	8051	6966	7760	7676	15876	20363	16942	17521	13429	10067	14716	21401
P0A847	Queuine tRNA-ribosyltransferase OS=Escherichia coli (strain K12) GN=tgt PE=1 SV=1	tgt	13	848.99	42548.2	2	846	1067	1361	369	478	383	480	352	369	243	186	206	221	216	452	681	656	480	375	261	508	524
P00954	Tryptophanyl-tRNA synthetase OS=Escherichia coli (strain K12) GN=trpS PE=1 SV=3	trpS	13	828.1	37396.1	2	1818	2000	2251	925	1098	1139	1372	1221	1092	854	655	614	539	505	1254	2096	1871	1459	1166	823	1136	1550
P0AAI5	3-oxoacyl-[acyl-carrier-protein] synthase 2 OS=Escherichia coli (strain K12) GN=fabF PE=1 SV=2	fabF	13	1121.67	43000.6	2	1917	4916	4766	1236	1825	1873	2138	1578	1890	1624	1399	1173	1430	1162	2361	2604	2091	2652	1909	1948	2196	2270
P0AEK2	3-oxoacyl-[acyl-carrier-protein] reductase OS=Escherichia coli (strain K12) GN=fabG PE=1 SV=1	fabG	13	906.71	25526.2	2	4675	8991	7632	2521	3354	3515	3492	3347	2992	2481	1920	1747	1663	1530	3623	3236	3880	3833	3499	2531	4198	3911
P0A6T5	GTP cyclohydrolase 1 OS=Escherichia coli (strain K12) GN=folE PE=1 SV=2	folE	13	818.81	24796.9	2	14176	1659	2574	2920	4856	5830	6842	5102	5775	3189	2087	1294	1026	1151	10153	6804	9821	10012	4257	3466	5244	8801
P30011	Nicotinate-nucleotide pyrophosphorylase [carboxylating] OS=Escherichia coli (strain K12) GN=nadC PE=1 SV=7	nadC	13	701.08	32723.9	2	631	568	597	405	490	484	562	597	431	400	311	291	184	201	519	474	660	802	609	508	560	654
P0A6T3	Galactokinase OS=Escherichia coli (strain K12) GN=galK PE=1 SV=2	galK	13	861.04	41397.8	2	369	1786	1355	520	610	795	591	517	529	589	551	442	275	221	486	511	278	432	777	4778	713	499
P0A6V8	Glucokinase OS=Escherichia coli (strain K12) GN=glk PE=1 SV=1	glk	13	908.61	34683	2	497	610	1061	600	671	1044	975	623	1035	852	952	888	282	298	509	639	692	965	1002	1113	767	1525
P00946	Mannose-6-phosphate isomerase OS=Escherichia coli (strain K12) GN=manA PE=1 SV=1	manA	13	667.04	42805	2	914	2033	2091	901	905	846	887	850	913	767	656	556	434	538	1186	975	871	1070	748	467	817	846
P06999	6-phosphofructokinase isozyme 2 OS=Escherichia coli (strain K12) GN=pfkB PE=1 SV=2	pfkB	13	816.88	32417.8	2	939	609	804	805	834	807	844	779	792	649	575	463	1151	1520	3358	2151	3045	1771	1544	1110	1157	1151
P76015	PTS-dependent dihydroxyacetone kinase, dihydroxyacetone-binding subunit dhaK OS=Escherichia coli (strain K12) GN=dhaK PE=1 SV=2	dhaK	13	772.17	38173.1	2	754	945	2239	645	810	1229	2381	779	997	991	869	970	172	210	545	376	418	719	1081	801	678	642
P0A993	Fructose-1,6-bisphosphatase class 1 OS=Escherichia coli (strain K12) GN=fbp PE=1 SV=1	fbp	13	852.29	36792.6	2	944	3235	2204	1859	1664	1118	1085	2429	979	914	803	608	727	531	1415	1213	1172	1338	1214	968	1821	899
P0AAG8	Galactose/methyl galactoside import ATP-binding protein MglA OS=Escherichia coli (strain K12) GN=mglA PE=1 SV=1	mglA	13	780.52	56361.5	2	25	336	225	115	236	203	170	211	360	483	388	390	24	21	23	43	19	86	331	533	249	122
P0AG80	sn-glycerol-3-phosphate-binding periplasmic protein ugpB OS=Escherichia coli (strain K12) GN=ugpB PE=1 SV=1	ugpB	13	717.41	48400	2	113	180	202	163	309	203	173	192	211	327	423	550	284	323	173	144	173	80	213	310	162	99
P0A6D3	3-phosphoshikimate 1-carboxyvinyltransferase OS=Escherichia coli (strain K12) GN=aroA PE=1 SV=1	aroA	13	954.72	46048.5	2	2056	658	1004	637	770	1282	1151	1018	799	552	445	370	744	648	2054	2107	2553	1633	827	866	911	1644
P06986	Histidinol-phosphate aminotransferase OS=Escherichia coli (strain K12) GN=hisC PE=1 SV=2	hisC	13	786.12	39317.3	2	2203	340	3144	653	921	1246	1614	1008	1443	1089	1139	777	343	368	1423	2389	1741	1478	1350	1443	1096	1522
P06988	Histidinol dehydrogenase OS=Escherichia coli (strain K12) GN=hisD PE=1 SV=5	hisD	13	645.87	46063.6	2	3447	778	4491	1065	1464	1722	2463	1731	1702	1430	1485	1086	905	893	2366	4165	2394	2106	1869	1383	1375	1970
P0AFK9	Spermidine/putrescine-binding periplasmic protein OS=Escherichia coli (strain K12) GN=potD PE=1 SV=1	potD	13	750.53	38824.5	2	3341	4165	5495	1690	3028	3056	2884	2447	2768	2411	2040	1446	1752	1797	3873	3186	2742	2455	2830	2065	3120	3044
P76108	Putative ABC transporter periplasmic-binding protein ydcS OS=Escherichia coli (strain K12) GN=ydcS PE=3 SV=1	ydcS	13	758.41	42250.1	2	82	232	319	291	589	476	318	263	391	771	1004	1447	586	694	47	41	56	60	362	803	299	92
D9IX93	GsiB OS=Escherichia coli (strain K12) GN=gsiB PE=4 SV=1	gsiB	13	521.76	56416.7	2	316	180	306	274	308	348	311	284	249	232	206	172	241	243	422	238	529	258	304	326	294	291
P0A9J8	P-protein OS=Escherichia coli (strain K12) GN=pheA PE=1 SV=1	pheA	13	1107.72	43066.4	2	1584	677	1078	1075	1244	1518	1465	1131	2020	2617	3141	3370	274	312	690	1143	796	907	1510	2208	1395	1457
P30859	Putative ABC transporter arginine-binding protein 2 OS=Escherichia coli (strain K12) GN=artI PE=1 SV=3	artI	13	788.28	26894.7	2	1927	2782	4874	2216	2748	2466	2528	2080	2547	2416	2150	1907	1686	2046	3138	1732	2442	1419	1955	1833	2140	1662
P00904	Anthranilate synthase component II OS=Escherichia coli (strain K12) GN=trpD PE=1 SV=3	trpG	13	762.63	56816.3	2	1025	332	647	523	648	978	1101	992	1366	868	772	648	190	286	613	1426	682	671	821	634	605	1312
P30125	3-isopropylmalate dehydrogenase OS=Escherichia coli (strain K12) GN=leuB PE=1 SV=3	leuB	13	919.93	39474	2	4588	593	751	7245	4458	4274	5032	2985	5455	6185	6294	6906	1444	1660	12223	6284	4683	6915	4282	7681	4403	5025
Q46851	Uncharacterized protein yghZ OS=Escherichia coli (strain K12) GN=yghZ PE=1 SV=1	gpr	13	695.77	38789.7	2	167	395	234	830	605	378	333	564	520	628	618	795	343	309	136	196	163	235	476	578	569	255
P77674	Gamma-aminobutyraldehyde dehydrogenase OS=Escherichia coli (strain K12) GN=prr PE=1 SV=1	prr	13	1244.43	50779.9	2	313	773	731	514	2370	925	1263	1183	974	1728	2296	2505	265	237	628	316	210	303	1176	2035	1906	324
P26646	Putative quinone oxidoreductase YhdH OS=Escherichia coli (strain K12) GN=yhdH PE=1 SV=1	acuI	13	827.53	34683.9	2	1097	1235	1530	1012	1376	1269	1390	1339	1076	1234	1251	1207	939	799	1238	1342	1425	1213	1391	1413	1150	1139
P0AEE1	Protein dcrB OS=Escherichia coli (strain K12) GN=dcrB PE=1 SV=1	dcrB	13	747.93	19757.1	2	2176	3454	3437	1141	1567	1811	1779	1555	1286	1037	855	756	1400	1364	2219	1915	2408	1848	1428	1048	1350	1676
P64451	Uncharacterized lipoprotein ydcL OS=Escherichia coli (strain K12) GN=ydcL PE=4 SV=1	ydcL	13	742.81	24393.5	2	1470	1284	1170	1316	2117	2365	2143	1298	1535	1951	2115	2398	2099	2385	1749	1393	2597	1281	1986	3127	1855	1487
P63224	Phosphoheptose isomerase OS=Escherichia coli (strain K12) GN=gmhA PE=1 SV=1	gmhA	13	813.54	20783.6	2	3370	4725	5207	3258	4156	3949	3964	4650	4311	4118	3865	2995	1973	1882	3947	3594	3631	3903	4449	3195	3811	3766
P0ABQ0	Coenzyme A biosynthesis bifunctional protein CoaBC OS=Escherichia coli (strain K12) GN=coaBC PE=1 SV=2	coaB	13	800.3	43392.7	2	252	596	342	223	227	345	246	429	451	395	343	418	80	176	198	363	247	267	227	184	184	283
P76372	Chain length determinant protein OS=Escherichia coli (strain K12) GN=wzzB PE=1 SV=2	wzzB	13	724.67	36414.2	2	1637	2331	2368	842	1265	1391	1298	1108	1332	1039	854	801	1163	1293	1407	1674	1913	1564	1135	1068	1447	1553
P0AAC0	Universal stress protein E OS=Escherichia coli (strain K12) GN=uspE PE=1 SV=2	uspE	12	778.24	35666.3	2	1445	1635	1110	1492	1465	1618	1651	1740	1503	1526	1777	1924	1925	1803	1632	1603	1901	1522	1669	1824	1049	1393
P0AA16	Transcriptional regulatory protein ompR OS=Escherichia coli (strain K12) GN=ompR PE=1 SV=1	ompR	12	639.67	27318.2	2	828	1606	1338	703	1074	988	1058	1121	825	870	859	840	566	616	792	920	883	821	955	942	815	799
P0A9K3	PhoH-like protein OS=Escherichia coli (strain K12) GN=ybeZ PE=1 SV=2	ybeZ	12	744.03	38996.5	2	734	1453	858	488	540	532	667	510	728	552	521	422	462	468	731	839	849	708	550	497	545	690
P0ADE6	Uncharacterized protein ygaU OS=Escherichia coli (strain K12) GN=ygaU PE=1 SV=2	ygaU	12	861.01	16035.3	2	1857	1146	1410	3065	3350	4260	3045	2850	3994	4818	6192	9009	9069	8299	3755	4246	5882	2012	4160	6026	3049	3164
P0A8G6	Flavoprotein wrbA OS=Escherichia coli (strain K12) GN=wrbA PE=1 SV=2	wrbA	12	745.93	20814.4	2	5306	3467	4130	8249	7343	7709	6744	4186	5988	7169	7173	6977	13406	13211	11745	8011	20628	6010	6449	8125	5794	5128
P25522	tRNA modification GTPase mnmE OS=Escherichia coli (strain K12) GN=mnmE PE=1 SV=3	mnmE	12	843.89	49182.6	2	292	484	330	228	258	273	236	263	243	237	176	178	141	190	290	349	292	263	243	237	243	242
P36979	Ribosomal RNA large subunit methyltransferase N OS=Escherichia coli (strain K12) GN=rlmN PE=1 SV=1	rlmN	12	679.23	43040	2	215	755	420	137	202	168	176	145	219	164	113	82	49	32	105	116	80	114	157	84	199	162
P0A7B1	Polyphosphate kinase OS=Escherichia coli (strain K12) GN=ppk PE=1 SV=2	ppk	12	657.97	80363.2	2	60	71	50	62	49	94	66	56	115	94	101	97	88	73	64	182	109	87	65	55	57	92
P16676	Sulfate/thiosulfate import ATP-binding protein CysA OS=Escherichia coli (strain K12) GN=cysA PE=3 SV=2	cysA	12	753.74	41015.5	2	705	203	502	564	843	577	828	968	768	529	350	264	143	94	325	872	742	752	653	454	807	840
P45523	FKBP-type peptidyl-prolyl cis-trans isomerase fkpA OS=Escherichia coli (strain K12) GN=fkpA PE=1 SV=1	fkpA	12	591.92	28846.1	2	5679	10637	7206	2885	3649	3833	4797	4675	3020	2353	1993	1649	2587	2507	4629	3865	5086	4577	4375	2967	4160	6050
P0A6Y5	33 kDa chaperonin OS=Escherichia coli (strain K12) GN=hslO PE=1 SV=1	hslO	12	638.13	32495.9	2	2363	5556	4248	1452	1940	1874	2026	1660	1852	1660	1411	1114	881	1229	1962	1857	1788	1845	1815	1176	1473	1664
P77689	FeS cluster assembly protein sufD OS=Escherichia coli (strain K12) GN=sufD PE=1 SV=1	sufD	12	913.94	46775.9	2	252	154	218	192	173	196	219	234	187	131	94	84	323	364	648	494	296	529	248	180	193	244
P22188	UDP-N-acetylmuramoyl-L-alanyl-D-glutamate--2,6-diaminopimelate ligase OS=Escherichia coli (strain K12) GN=murE PE=1 SV=2	murE	12	772.2	53291.9	2	512	700	555	509	396	344	376	503	337	277	222	203	232	192	413	599	585	462	396	302	351	435
P37692	ADP-heptose--LPS heptosyltransferase 2 OS=Escherichia coli (strain K12) GN=rfaF PE=1 SV=1	rfaF	12	815.31	38999.1	1	189	373	NA	55	193	136	259	93	52	56	69	31	27	14	127	106	138	NA	NA	54	118	NA
P39180	Antigen 43 OS=Escherichia coli (strain K12) GN=flu PE=1 SV=3	flu	12	857.48	106743	2	59	103	98	74	34	146	48	48	32	41	34	68	78	67	105	392	127	61	98	172	16	325
P21888	Cysteinyl-tRNA synthetase OS=Escherichia coli (strain K12) GN=cysS PE=1 SV=2	cysS	12	798.56	52150.6	2	550	856	550	277	354	382	381	391	335	253	228	186	302	192	626	577	573	591	355	410	339	572
P0A805	Ribosome-recycling factor OS=Escherichia coli (strain K12) GN=frr PE=1 SV=1	frr	12	702.98	20607.9	2	5649	8329	7000	3121	3492	3761	4157	3912	3234	3015	2385	2064	2802	2684	5463	5116	5856	4595	3568	2616	3540	4212
P0A707	Translation initiation factor IF-3 OS=Escherichia coli (strain K12) GN=infC PE=1 SV=1	infC	12	945.43	20533	2	6930	13496	9227	3918	5559	5497	6603	5435	5871	4621	3623	3162	4716	5467	12254	9131	8260	9763	6919	7327	8414	10509
P0A7W7	30S ribosomal protein S8 OS=Escherichia coli (strain K12) GN=rpsH PE=1 SV=2	rpsH	12	717.25	14099.5	2	22152	58622	37259	9190	14453	17287	18273	13560	14108	9130	7225	6233	10561	9376	20079	25849	21772	19981	14176	10026	15466	22410
P14081	Selenocysteine-specific elongation factor OS=Escherichia coli (strain K12) GN=selB PE=1 SV=3	selB	12	717.82	68806.6	2	49	58	66	28	35	34	44	48	59	35	34	34	6	5	23	79	35	40	43	32	36	40
P0AAI9	Malonyl CoA-acyl carrier protein transacylase OS=Escherichia coli (strain K12) GN=fabD PE=1 SV=2	fabD	12	731.15	32378.4	2	3385	6549	5422	2024	2233	2226	2283	2282	1708	1443	1351	1232	1070	1297	2178	1838	2438	1908	2232	1139	2165	2292
P09127	Putative uroporphyrinogen-III C-methyltransferase OS=Escherichia coli (strain K12) GN=hemX PE=1 SV=1	hemX	12	695.25	42918.9	2	587	996	1026	429	580	581	622	602	449	449	427	367	316	331	628	498	533	593	615	589	633	527
P31057	3-methyl-2-oxobutanoate hydroxymethyltransferase OS=Escherichia coli (strain K12) GN=panB PE=1 SV=1	panB	12	702	28201.4	2	2579	2118	2711	2650	2510	2222	2246	2087	2465	2307	2033	2074	1260	1081	1868	2806	2139	2278	2034	1486	1812	2224
P31663	Pantothenate synthetase OS=Escherichia coli (strain K12) GN=panC PE=1 SV=1	panC	12	792.88	31559.7	2	1286	1437	1365	1092	1188	1173	1359	1420	1108	932	902	817	710	717	1439	1511	1557	1329	999	1028	1041	1316
P04425	Glutathione synthetase OS=Escherichia coli (strain K12) GN=gshB PE=1 SV=1	gshB	12	909.05	35520.3	2	1279	1594	1638	1116	1043	1060	1154	1073	1021	958	870	842	583	586	1270	1014	1388	1301	1157	1083	1114	1273
P69783	Glucose-specific phosphotransferase enzyme IIA component OS=Escherichia coli (strain K12) GN=crr PE=1 SV=2	crr	12	660.78	18221.7	2	33524	25210	27051	17108	21004	29541	24827	20525	26225	24667	23750	23449	18977	22967	34345	32036	32331	23122	25358	24931	19715	29309
P0A6V1	Glucose-1-phosphate adenylyltransferase OS=Escherichia coli (strain K12) GN=glgC PE=1 SV=2	glgC	12	683.23	48648.5	2	240	309	283	288	213	257	292	310	427	382	374	398	222	263	224	326	328	269	260	181	213	274
P24215	Mannonate dehydratase OS=Escherichia coli (strain K12) GN=uxuA PE=1 SV=2	uxuA	12	707.59	44791.6	2	395	1902	859	347	508	448	494	332	417	481	579	518	225	159	248	294	316	286	580	417	381	360
P02924	L-arabinose-binding periplasmic protein OS=Escherichia coli (strain K12) GN=araF PE=1 SV=2	araF	12	453.09	35500.3	2	35	101	81	145	236	139	89	109	118	312	381	656	308	258	52	62	27	89	176	339	163	29
P69811	Multiphosphoryl transfer protein OS=Escherichia coli (strain K12) GN=fruB PE=1 SV=1	fruB	12	901.74	39605.5	2	301	590	395	138	179	389	257	136	266	224	206	178	244	423	408	542	320	355	265	185	165	6903
P69831	Galactitol permease IIC component OS=Escherichia coli (strain K12) GN=gatC PE=1 SV=1	gatC	12	660.86	48315.2	2	580	3567	2060	2414	3003	3058	2295	2748	4826	6462	4783	3800	176	138	217	320	372	1099	2585	1146	3242	2049
P0AE12	AMP nucleosidase OS=Escherichia coli (strain K12) GN=amn PE=1 SV=1	amn	12	742.55	53943.4	2	426	313	298	393	361	438	446	450	487	391	403	337	327	296	523	585	567	530	398	351	345	448
P60560	GMP reductase OS=Escherichia coli (strain K12) GN=guaC PE=1 SV=1	guaC	12	715.5	37341.8	2	1145	1215	663	650	1166	1033	1149	1217	1190	577	348	251	347	414	660	1342	780	1110	898	729	1157	1165
P0AG16	Amidophosphoribosyltransferase OS=Escherichia coli (strain K12) GN=purF PE=1 SV=2	purF	12	769.17	56434.6	2	771	110	634	280	331	453	394	498	457	302	211	169	94	117	378	765	376	391	436	240	401	620
P07024	Protein UshA OS=Escherichia coli (strain K12) GN=ushA PE=1 SV=2	ushA	12	656.64	60767.7	2	363	459	541	300	375	442	385	315	346	334	318	279	303	336	413	458	418	338	331	334	364	296
P0A6C8	Acetylglutamate kinase OS=Escherichia coli (strain K12) GN=argB PE=1 SV=1	argB	12	980.26	27124.5	2	6391	405	527	2343	2928	3414	3864	3905	2748	1761	1871	2263	634	666	3108	5518	4453	3676	3547	2759	3629	5486
P05194	3-dehydroquinate dehydratase OS=Escherichia coli (strain K12) GN=aroD PE=1 SV=2	aroD	12	628.89	27431.2	2	881	475	574	429	477	709	603	607	446	372	302	267	279	326	921	1016	1228	806	572	481	523	792
P09053	Valine--pyruvate aminotransferase OS=Escherichia coli (strain K12) GN=avtA PE=3 SV=3	avtA	12	614.64	46663	2	553	383	424	363	368	359	372	329	370	348	251	160	52	28	537	643	494	380	237	248	274	361
P00935	Cystathionine gamma-synthase OS=Escherichia coli (strain K12) GN=metB PE=1 SV=1	metB	12	717.97	41506.5	2	1916	235	427	1074	696	834	1347	870	1210	653	776	747	478	237	806	1442	1291	1211	1002	1016	883	1585
P06721	Cystathionine beta-lyase metC OS=Escherichia coli (strain K12) GN=metC PE=1 SV=1	metC	12	875.64	43167	2	2128	319	360	760	945	799	1006	1043	1165	1017	925	778	188	281	576	689	1063	1029	1003	632	643	878
P16456	Selenide, water dikinase OS=Escherichia coli (strain K12) GN=selD PE=1 SV=1	selD	12	687.88	36645.7	2	708	1402	1038	671	709	644	665	667	692	611	520	463	291	309	986	843	834	789	668	392	573	574
P21156	Sulfate adenylyltransferase subunit 2 OS=Escherichia coli (strain K12) GN=cysD PE=1 SV=3	cysD	12	615.34	35147.9	2	1300	362	797	589	813	747	854	736	871	476	360	233	126	100	537	1646	980	834	626	420	628	1113
P17854	Phosphoadenosine phosphosulfate reductase OS=Escherichia coli (strain K12) GN=cysH PE=1 SV=3	cysH	12	653.72	27940.5	2	1861	476	1337	707	1186	1444	1572	1247	849	609	436	346	184	147	686	1440	894	1050	920	822	948	1532
P0A6C5	Amino-acid acetyltransferase OS=Escherichia coli (strain K12) GN=argA PE=1 SV=1	argA	12	584.47	49146.5	2	333	222	142	157	190	198	253	246	365	206	169	177	76	65	186	297	207	272	235	120	194	320
P06987	Histidine biosynthesis bifunctional protein hisB OS=Escherichia coli (strain K12) GN=hisB PE=1 SV=1	hisB	12	798.46	40234.3	2	2794	692	3068	863	1391	1294	2276	1475	1608	1324	1326	967	482	488	1217	2373	1281	1596	1877	1381	1450	1924
P07003	Pyruvate dehydrogenase [ubiquinone] OS=Escherichia coli (strain K12) GN=poxB PE=1 SV=1	poxB	12	774.23	61953.5	2	258	170	172	435	347	363	278	150	431	470	616	865	705	720	555	405	980	229	331	511	266	250
P09394	Glycerophosphoryl diester phosphodiesterase OS=Escherichia coli (strain K12) GN=glpQ PE=1 SV=2	glpQ	12	522.55	40799.3	2	164	1298	1396	92	106	130	624	86	108	88	70	65	54	84	81	124	47	53	75	42	64	83
P0ABA4	ATP synthase subunit delta OS=Escherichia coli (strain K12) GN=atpH PE=1 SV=1	atpH	12	788.83	19302	2	7700	11886	16092	5679	7452	8325	7941	9233	6781	5654	4332	3008	2980	3028	6415	6263	5603	7979	7303	5276	8236	8789
P25437	S-(hydroxymethyl)glutathione dehydrogenase OS=Escherichia coli (strain K12) GN=frmA PE=1 SV=3	frmA	12	609.35	39315.9	2	551	1528	897	535	604	454	672	530	461	407	370	349	222	176	494	464	647	431	852	427	469	491
P38489	Oxygen-insensitive NAD(P)H nitroreductase OS=Escherichia coli (strain K12) GN=nfnB PE=1 SV=1	nfnB	12	593.25	23872.2	2	1503	2039	2138	713	916	1210	1149	997	927	839	620	401	243	277	1477	1510	1510	1098	886	563	788	990
P37744	Glucose-1-phosphate thymidylyltransferase 1 OS=Escherichia coli (strain K12) GN=rmlA1 PE=1 SV=2	rmlA	12	557.1	32654.7	2	635	1510	1206	405	484	600	623	381	477	418	330	236	233	253	499	589	518	703	432	263	461	523
P0ABS1	DnaK suppressor protein OS=Escherichia coli (strain K12) GN=dksA PE=1 SV=1	dksA	11	923.54	17498.7	2	5844	19594	14808	3644	5535	6968	6499	4650	5510	4733	4090	3294	5264	5261	10477	7390	8437	6986	5676	4069	5476	5868
P45577	ProP effector OS=Escherichia coli (strain K12) GN=proQ PE=1 SV=2	proQ	11	867.86	25858.6	2	2318	4624	3788	1374	2304	2029	2510	1840	1992	1377	1060	825	655	551	2073	1933	2344	2508	1542	1404	2155	2924
P0A9Q1	Aerobic respiration control protein ArcA OS=Escherichia coli (strain K12) GN=arcA PE=1 SV=1	arcA	11	904.76	27256.9	2	3367	5464	4517	3058	4278	4483	3944	2999	3704	4401	4363	4297	4039	4123	4689	4527	7828	3338	4319	5962	4265	3363
P0AG20	GTP pyrophosphokinase OS=Escherichia coli (strain K12) GN=relA PE=1 SV=1	relA	11	617.1	83805.1	2	64	98	75	52	53	71	59	80	100	92	97	95	61	42	76	92	65	71	63	47	48	73
P37903	Universal stress protein F OS=Escherichia coli (strain K12) GN=uspF PE=1 SV=2	uspF	11	615.53	15988.5	2	1378	3013	1651	3199	4468	3964	3356	4701	4004	5796	6788	6969	3889	4792	1605	1780	1080	1777	4770	5087	4057	2216
P39177	Universal stress protein G OS=Escherichia coli (strain K12) GN=uspG PE=1 SV=2	uspG	11	840.32	15907.3	2	1174	3224	1172	1352	1267	1962	1088	1071	981	1219	1460	1509	4184	4048	1453	1783	2335	1076	1089	780	1012	889
P0ADW3	Putative cytochrome d ubiquinol oxidase subunit 3 OS=Escherichia coli (strain K12) GN=yhcB PE=1 SV=2	yhcB	11	912.17	14933.5	2	5444	6150	6936	2959	4073	5178	5167	4920	4303	3335	3119	2422	2151	2667	4355	3963	3516	3324	3546	3260	3006	3814
P0ADN2	UPF0438 protein yifE OS=Escherichia coli (strain K12) GN=yifE PE=1 SV=2	yifE	11	660.67	13107.4	2	5671	7327	8808	3271	5765	4737	6417	5882	5251	3382	2892	2405	3227	3329	8154	8417	7172	6806	4707	4282	5269	6591
P77774	Lipoprotein yfgL OS=Escherichia coli (strain K12) GN=yfgL PE=1 SV=1	bamB	11	674.84	41843.3	2	962	1670	1404	656	908	879	925	1109	732	812	651	609	622	528	1175	1115	1021	965	857	707	804	902
P76113	Putative NADP-dependent oxidoreductase yncB OS=Escherichia coli (strain K12) GN=yncB PE=3 SV=3	curA	11	681.37	37568	2	663	380	527	685	717	745	696	480	506	567	747	1020	819	773	946	441	1090	445	664	1024	493	442
P25519	GTP-binding protein hflX OS=Escherichia coli (strain K12) GN=hflX PE=1 SV=3	hflX	11	911.29	48279.3	2	239	437	248	171	208	191	299	266	262	211	184	180	108	113	191	259	205	224	296	197	228	343
P0ACF8	DNA-binding protein H-NS OS=Escherichia coli (strain K12) GN=hns PE=1 SV=2	hns	11	778.89	15512	2	22541	47133	44799	25196	33303	24712	35150	33464	34713	32872	24207	24220	22028	26982	34965	18698	35876	27234	27614	23585	26041	36221
P0ACG1	DNA-binding protein stpA OS=Escherichia coli (strain K12) GN=stpA PE=3 SV=1	stpA	11	654.45	15320	2	6863	5241	2743	2121	2856	3928	2501	1898	3106	2252	1416	904	2963	2945	6727	14125	5383	3797	2926	2190	3144	3601
P39831	NADP-dependent 3-hydroxy acid dehydrogenase YdfG OS=Escherichia coli (strain K12) GN=ydfG PE=1 SV=2	ydfG	11	603.49	27213.8	2	1891	2097	2281	1926	2088	2466	2361	2033	1948	1665	1677	1245	1437	1191	1901	2405	2644	2052	2018	1761	2530	2198
P0AC02	UPF0169 lipoprotein yfiO OS=Escherichia coli (strain K12) GN=yfiO PE=1 SV=1	bamD	11	503.65	27793.8	2	1372	2107	1819	639	1091	1055	1086	1400	773	591	485	401	545	506	1276	1038	1044	1093	928	632	901	1160
P39286	Putative ribosome biogenesis GTPase RsgA OS=Escherichia coli (strain K12) GN=rsgA PE=1 SV=2	rsgA	11	629.32	39150.9	2	374	392	377	196	289	300	327	310	248	203	169	187	160	154	294	432	286	319	262	216	243	282
P77247	Phosphatase YniC OS=Escherichia coli (strain K12) GN=yniC PE=1 SV=1	yniC	11	449.22	24296.7	2	519	885	827	362	447	471	429	482	343	260	206	142	137	150	410	506	351	427	387	244	396	481
P76536	Uncharacterized protein yfeX OS=Escherichia coli (strain K12) GN=yfeX PE=3 SV=2	yfeX	11	961.12	33013.5	2	489	1098	782	426	488	423	530	540	533	529	406	357	136	122	594	950	549	493	419	313	388	456
P22255	3'(2'),5'-bisphosphate nucleotidase CysQ OS=Escherichia coli (strain K12) GN=cysQ PE=1 SV=2	cysQ	11	649.8	27140.7	2	917	978	924	823	881	1068	861	837	612	633	721	968	1823	1914	1196	1136	1516	690	925	1106	680	730
P0A9K7	Phosphate transport system protein phoU OS=Escherichia coli (strain K12) GN=phoU PE=1 SV=1	phoU	11	647.52	27381.7	2	338	587	558	203	349	312	486	413	412	348	311	272	141	157	203	314	323	363	351	351	346	333
P13024	Protein FdhE OS=Escherichia coli (strain K12) GN=fdhE PE=3 SV=2	fdhE	11	856.45	34706.3	2	373	1583	405	208	225	334	236	293	267	264	191	171	374	56	378	362	350	281	278	231	280	249
P27249	[Protein-PII] uridylyltransferase OS=Escherichia coli (strain K12) GN=glnD PE=3 SV=2	glnD	11	575.83	102308	2	126	280	197	112	145	140	141	162	168	157	140	134	59	56	108	152	106	136	148	118	181	147
P0AC59	Glutaredoxin-2 OS=Escherichia coli (strain K12) GN=grxB PE=1 SV=1	grxB	11	561.28	24316.7	2	2666	1445	1654	1907	2360	2960	1997	2300	1840	1474	1346	840	3421	3717	8405	2891	5056	2709	2849	2780	2648	2400
P0AFL3	Peptidyl-prolyl cis-trans isomerase A OS=Escherichia coli (strain K12) GN=ppiA PE=1 SV=1	ppiA	11	676.01	20400.4	2	2576	2280	2243	2336	2284	1562	2225	2240	1143	1227	1028	1066	690	803	1488	2546	1417	1391	2068	1644	1821	1807
P0A862	Thiol peroxidase OS=Escherichia coli (strain K12) GN=tpx PE=1 SV=2	tpx	11	757.4	17806.2	2	24694	28899	34680	17469	20976	23905	23441	24350	25981	21681	19704	14888	26493	25398	42334	34928	36799	32276	23934	24385	26644	29015
Q46845	Uncharacterized GST-like protein yghU OS=Escherichia coli (strain K12) GN=yghU PE=1 SV=2	yghU	11	716.21	32353.4	2	769	488	645	995	1121	941	1040	911	872	1002	890	1077	739	681	988	646	1073	835	960	1299	961	718
P0AG14	Probable protease sohB OS=Escherichia coli (strain K12) GN=sohB PE=1 SV=1	sohB	11	743.39	39323.7	2	413	426	373	269	302	391	408	356	502	349	274	279	288	317	441	525	490	605	388	241	347	619
P0A6J8	D-alanine--D-alanine ligase A OS=Escherichia coli (strain K12) GN=ddlA PE=3 SV=1	ddlA	11	845.5	39273.3	2	140	897	770	97	89	109	91	113	83	60	39	34	163	143	298	183	225	245	82	62	98	130
P37636	Multidrug resistance protein mdtE OS=Escherichia coli (strain K12) GN=mdtE PE=1 SV=1	mdtE	11	726.93	41147.5	2	13	24	11	26	9	7	10	8	8	9	7	8	95	95	18	33	279	13	8	7	7	7
P36767	Recombination-associated protein rdgC OS=Escherichia coli (strain K12) GN=rdgC PE=1 SV=1	rdgC	11	646.86	33953.5	2	561	739	588	280	400	438	425	450	344	263	229	216	325	297	510	609	518	501	343	375	440	433
P0A6X7	Integration host factor subunit alpha OS=Escherichia coli (strain K12) GN=ihfA PE=1 SV=1	ihfA	11	537.93	11329	2	4676	4810	4281	3415	4169	4995	5008	4234	4395	3848	4423	4516	7806	6822	7112	6857	7937	4924	4677	5093	3960	4647
P0A9F3	HTH-type transcriptional regulator CysB OS=Escherichia coli (strain K12) GN=cysB PE=3 SV=1	cysB	11	586.43	36109.9	2	523	620	604	303	408	544	403	338	451	332	263	240	202	133	263	445	473	358	317	278	351	360
P76268	Transcriptional regulator kdgR OS=Escherichia coli (strain K12) GN=kdgR PE=1 SV=1	kdgR	11	636.45	29992.5	2	546	866	712	444	600	663	564	547	553	516	431	427	277	244	480	692	615	605	641	572	666	710
P0ACJ0	Leucine-responsive regulatory protein OS=Escherichia coli (strain K12) GN=lrp PE=1 SV=2	lrp	11	416.09	18857	2	6092	3555	6017	5416	6795	6813	7004	5778	8661	7875	7704	6712	4447	4350	7888	8024	7698	7641	5649	7500	5811	8057
P0A7J7	50S ribosomal protein L11 OS=Escherichia coli (strain K12) GN=rplK PE=1 SV=2	rplK	11	702.29	14847.9	2	11140	27559	19476	4425	6400	7962	8006	5989	7120	4953	3818	3029	4316	4543	8317	10617	9182	8696	6518	4214	7570	9888
P68919	50S ribosomal protein L25 OS=Escherichia coli (strain K12) GN=rplY PE=1 SV=1	rplY	11	568.56	10668.7	2	20176	45584	29690	9904	12774	15504	15540	11375	12683	9500	7645	5945	9392	8781	20054	19689	21320	19323	13321	8092	12510	17457
P0A7X3	30S ribosomal protein S9 OS=Escherichia coli (strain K12) GN=rpsI PE=1 SV=2	rpsI	11	393.35	14829	2	8821	20837	14224	4480	6913	7384	7971	5852	8034	5261	3918	3184	3626	4081	6177	10002	8023	8766	5436	4149	5791	8335
P0A9Q5	Acetyl-coenzyme A carboxylase carboxyl transferase subunit beta OS=Escherichia coli (strain K12) GN=accD PE=1 SV=1	accD	11	614.69	33282.1	2	1660	3440	2805	858	1377	1421	1736	1397	1419	1223	1077	1107	394	500	932	1249	991	1235	1685	849	1589	1969
P10384	Long-chain fatty acid transport protein OS=Escherichia coli (strain K12) GN=fadL PE=1 SV=5	fadL	11	684.13	48493.5	2	472	3157	3027	2176	3940	1649	1328	2459	1630	3376	3808	3936	1477	1765	354	458	417	556	2580	3285	2130	636
P0A8K1	Phosphatidylserine decarboxylase proenzyme OS=Escherichia coli (strain K12) GN=psd PE=1 SV=1	psd	11	504.8	35893.7	2	1620	1882	1748	905	1147	1282	1470	1508	1163	1097	1026	1079	770	855	1323	1334	1221	1256	1440	1074	1318	1663
P69451	Long-chain-fatty-acid--CoA ligase OS=Escherichia coli (strain K12) GN=fadD PE=1 SV=1	fadD	11	549.24	62274.5	2	150	539	376	228	350	175	150	263	331	458	458	412	229	236	210	303	104	139	265	225	238	135
P0AG84	Uncharacterized oxidoreductase yghA OS=Escherichia coli (strain K12) GN=yghA PE=1 SV=1	yghA	11	442.26	31450.3	2	150	78	105	187	144	198	106	93	108	124	229	294	388	404	212	172	257	58	165	365	100	53
P0AEZ9	Molybdenum cofactor biosynthesis protein B OS=Escherichia coli (strain K12) GN=moaB PE=1 SV=2	moaB	11	868.03	18635.5	2	2560	2778	2080	2618	2056	2683	2488	2251	2201	1336	1294	1341	6310	6135	7405	5455	6836	3048	2496	2699	1925	2427
P0AAB4	3-octaprenyl-4-hydroxybenzoate carboxy-lyase OS=Escherichia coli (strain K12) GN=ubiD PE=1 SV=1	ubiD	11	562.56	55550.3	2	244	712	570	283	332	318	283	362	490	501	442	479	111	165	256	344	227	294	400	270	289	314
P0A759	Glucosamine-6-phosphate deaminase OS=Escherichia coli (strain K12) GN=nagB PE=1 SV=1	nagB	11	457.8	29737.1	2	550	1141	643	704	835	1417	804	563	903	916	841	748	780	684	536	764	1058	663	974	2576	661	724
P0A8G3	Uronate isomerase OS=Escherichia coli (strain K12) GN=uxaC PE=3 SV=1	uxaC	11	599.68	53934.6	2	143	355	188	167	231	247	228	180	215	202	228	215	145	177	122	225	144	160	232	189	177	323
P37349	PTS-dependent dihydroxyacetone kinase, phosphotransferase subunit dhaM OS=Escherichia coli (strain K12) GN=dhaM PE=1 SV=3	dhaM	11	764.21	51398.3	2	340	354	667	69	79	229	447	130	157	93	80	66	133	137	454	520	390	389	138	115	75	233
P69805	Mannose permease IID component OS=Escherichia coli (strain K12) GN=manZ PE=1 SV=1	manZ	11	641.02	31264.6	2	341	475	260	242	246	1035	385	210	2547	1786	1340	809	304	249	183	524	324	351	569	189	217	739
P39325	ABC transporter periplasmic-binding protein ytfQ OS=Escherichia coli (strain K12) GN=ytfQ PE=1 SV=1	ytfQ	11	555.91	34304.8	2	99	380	282	529	816	512	336	429	458	972	1363	1951	1472	1254	115	112	84	182	684	3003	725	199
P37051	Formyltetrahydrofolate deformylase OS=Escherichia coli (strain K12) GN=purU PE=1 SV=1	purU	11	1030.44	31896.5	2	2304	1294	1371	1139	1346	1550	1357	1015	1774	1205	960	754	1254	1119	1771	2967	2231	2190	1383	943	1676	2332
P08331	2',3'-cyclic-nucleotide 2'-phosphodiesterase/3'-nucleotidase OS=Escherichia coli (strain K12) GN=cpdB PE=1 SV=2	cpdB	11	781.63	70769.8	2	134	536	379	262	257	249	198	221	247	281	223	206	118	85	116	178	116	202	265	189	286	183
P11446	N-acetyl-gamma-glutamyl-phosphate reductase OS=Escherichia coli (strain K12) GN=argC PE=3 SV=1	argC	11	750.6	35911.4	2	1718	231	245	833	932	967	1243	1075	1143	634	620	590	385	340	1321	1914	1879	1573	919	813	1047	1570
P16703	Cysteine synthase B OS=Escherichia coli (strain K12) GN=cysM PE=1 SV=1	cysM	11	710.74	32625.5	2	1533	612	1442	858	1087	1128	972	974	1167	776	534	490	548	547	1300	1187	1490	1372	801	641	1163	1181
P29745	Peptidase T OS=Escherichia coli (strain K12) GN=pepT PE=1 SV=2	pepT	11	570.65	44876.8	2	262	204	170	314	281	277	323	279	288	259	255	275	248	226	284	348	382	227	287	281	209	275
P0A821	L-seryl-tRNA(Sec) selenium transferase OS=Escherichia coli (strain K12) GN=selA PE=1 SV=1	selA	11	684.16	50557.5	2	181	140	188	107	164	186	185	215	199	160	134	138	97	118	152	150	182	219	182	156	189	224
P30177	Uncharacterized protein ybiB OS=Escherichia coli (strain K12) GN=ybiB PE=3 SV=1	ybiB	11	508.11	35008.1	2	716	859	754	602	481	893	495	453	620	563	538	518	880	808	1297	1039	1554	816	562	726	455	642
P0A6L2	Dihydrodipicolinate synthase OS=Escherichia coli (strain K12) GN=dapA PE=1 SV=1	dapA	11	682.04	31232.1	2	3589	3962	4769	2275	3066	3443	3807	3317	3071	2301	1933	1205	1825	1671	4878	4248	5035	4949	3639	2319	4026	4928
P37313	Dipeptide transport ATP-binding protein DppF OS=Escherichia coli (strain K12) GN=dppF PE=3 SV=1	dppF	11	485.78	37518.4	2	309	235	1604	416	744	460	575	641	569	558	453	435	44	65	171	504	427	501	542	403	737	551
P0AES0	Bifunctional glutathionylspermidine synthetase/amidase OS=Escherichia coli (strain K12) GN=gsp PE=1 SV=1	gss	11	521.79	70469.4	2	184	102	81	68	67	73	83	68	78	53	40	46	151	139	198	355	461	202	81	65	60	163
P77444	Cysteine desulfurase OS=Escherichia coli (strain K12) GN=sufS PE=1 SV=1	sufS	11	689.39	44387.5	2	508	177	325	413	366	350	367	419	336	321	273	238	371	404	1408	450	629	701	377	343	247	326
P00909	Tryptophan biosynthesis protein trpCF OS=Escherichia coli (strain K12) GN=trpC PE=1 SV=3	trpC	11	680.1	49312.3	2	804	95	89	334	461	590	616	653	572	464	359	312	211	252	532	852	585	496	490	477	465	813
P0AAG0	Dipeptide transport ATP-binding protein DppD OS=Escherichia coli (strain K12) GN=dppD PE=3 SV=1	dppD	11	562.55	35803.4	2	367	434	1222	389	656	565	585	660	520	490	424	376	150	169	332	608	481	423	559	415	665	582
P0AFD1	NADH-quinone oxidoreductase subunit E OS=Escherichia coli (strain K12) GN=nuoE PE=1 SV=1	nuoE	11	656.05	18560.2	2	748	5284	3004	785	1507	1660	1398	1192	1076	1331	1291	1058	187	214	554	805	924	793	1287	908	1356	1074
P30178	Uncharacterized oxidoreductase ybiC OS=Escherichia coli (strain K12) GN=ybiC PE=1 SV=2	ybiC	11	1210.26	38854.3	2	1634	621	675	983	658	1006	611	708	905	670	499	384	357	420	1051	895	1669	898	646	353	554	906
P25906	Putative oxidoreductase YdbC OS=Escherichia coli (strain K12) GN=ydbC PE=1 SV=1	ydbC	11	694.81	30668.8	2	413	345	414	947	860	741	603	557	689	874	915	1411	880	972	592	222	633	327	667	883	578	343
P0ABA0	ATP synthase subunit b OS=Escherichia coli (strain K12) GN=atpF PE=1 SV=1	atpF	11	685.03	17235.3	2	8988	13934	18264	5495	9735	9147	9956	11267	7598	5943	4337	3471	5133	4762	8709	8456	6360	9156	8575	5249	8841	9158
P24232	Flavohemoprotein OS=Escherichia coli (strain K12) GN=hmp PE=1 SV=1	hmp	11	595.45	43822	2	149	349	277	44	102	108	84	85	144	99	71	41	68	86	1015	230	140	168	141	54	106	130
P28304	Quinone oxidoreductase 1 OS=Escherichia coli (strain K12) GN=qorA PE=1 SV=1	qorA	11	730.37	35132.5	2	871	678	910	1623	1223	1499	1250	1119	907	1083	1256	1814	1740	1718	1241	1407	2093	968	1332	2085	1018	893
P25714	Inner membrane protein oxaA OS=Escherichia coli (strain K12) GN=oxaA PE=1 SV=2	yidC	10	523.71	61468.4	2	842	2030	1523	486	714	840	866	843	1081	816	729	672	331	459	533	897	858	791	888	502	729	1091
P0AED0	Universal stress protein A OS=Escherichia coli (strain K12) GN=uspA PE=1 SV=2	uspA	10	859.56	16038.1	2	37520	30073	27116	42810	30104	35266	33285	55564	45855	48443	55625	53570	13250	20160	44183	31152	25681	39232	51638	34691	24290	31448
P0AF28	Nitrate/nitrite response regulator protein narL OS=Escherichia coli (strain K12) GN=narL PE=1 SV=1	narL	10	696.62	23893.7	2	1239	1765	1328	1109	1202	1542	1284	1041	935	809	748	490	804	632	1300	1633	1290	1151	1389	1186	1078	1063
P0A8I3	UPF0246 protein yaaA OS=Escherichia coli (strain K12) GN=yaaA PE=1 SV=1	yaaA	10	549.35	29549.3	2	803	1105	907	432	519	747	599	570	462	366	290	183	107	89	535	674	541	738	651	387	538	835
P0A8E7	UPF0234 protein yajQ OS=Escherichia coli (strain K12) GN=yajQ PE=1 SV=2	yajQ	10	890.51	18314.5	2	10057	10699	14430	6357	7517	8787	7733	8010	8008	6578	5915	6386	7152	7357	12352	12640	13272	8961	7248	7202	6753	8699
P0A8B5	UPF0133 protein ybaB OS=Escherichia coli (strain K12) GN=ybaB PE=1 SV=1	ybaB	10	701.89	11988.9	2	6880	11963	9845	3611	5005	5221	5855	5501	4956	3480	2800	2590	3149	3267	7769	7447	7196	6038	5206	3434	5491	6422
P76097	Uncharacterized protein ydcJ OS=Escherichia coli (strain K12) GN=ydcJ PE=4 SV=1	ydcJ	10	395.81	50992.6	2	43	61	66	55	126	62	84	50	67	79	106	142	73	59	41	49	60	37	59	98	65	44
P43672	ABC transporter ATP-binding protein uup OS=Escherichia coli (strain K12) GN=uup PE=1 SV=2	uup	10	532.11	72004.1	2	156	420	256	95	93	120	111	106	143	110	86	70	37	45	105	117	112	126	127	77	116	157
P33920	Nucleoid-associated protein YejK OS=Escherichia coli (strain K12) GN=yejK PE=1 SV=3	yejK	10	670.39	37781.1	2	833	1147	1095	480	726	585	666	571	635	557	484	516	396	347	580	648	593	750	763	611	774	853
P0ADR8	LOG family protein ygdH OS=Escherichia coli (strain K12) GN=ygdH PE=1 SV=1	ygdH	10	599.49	50921.2	2	199	597	296	183	245	218	231	161	247	238	208	193	165	178	178	137	314	261	209	197	223	209
P0A894	UPF0042 nucleotide-binding protein yhbJ OS=Escherichia coli (strain K12) GN=yhbJ PE=1 SV=1	yhbJ	10	533.08	32453.7	2	231	225	152	165	225	208	224	220	213	201	209	187	96	105	202	355	254	247	238	216	210	236
P46853	Uncharacterized oxidoreductase yhhX OS=Escherichia coli (strain K12) GN=yhhX PE=1 SV=1	yhhX	10	569.68	38722.7	2	424	792	608	334	369	386	412	405	324	312	243	236	347	237	559	485	603	461	310	292	356	407
P31658	Chaperone protein hchA OS=Escherichia coli (strain K12) GN=hchA PE=1 SV=3	hchA	10	452.82	31152.6	2	628	848	300	1217	774	1038	602	344	530	573	701	816	2156	1765	1211	2571	1864	413	719	842	527	462
P0A9V1	Lipopolysaccharide export system ATP-binding protein LptB OS=Escherichia coli (strain K12) GN=lptB PE=1 SV=2	lptB	10	833	26766.1	2	1635	2132	2060	917	1394	1162	1419	1415	1144	970	951	880	618	577	1128	1216	1207	1143	1091	1010	1116	1308
P33940	Malate:quinone oxidoreductase OS=Escherichia coli (strain K12) GN=mqo PE=1 SV=2	mqo	10	558.03	60173.8	2	146	255	89	47	13	19	12	222	10	10	14	9	20	24	181	29	46	304	14	28	29	131
P67087	Ribosomal RNA small subunit methyltransferase I OS=Escherichia coli (strain K12) GN=rsmI PE=1 SV=1	rsmI	10	655.6	31310.6	2	383	513	336	243	259	271	295	322	224	187	155	132	160	154	310	299	261	302	269	224	233	283
P21367	Uncharacterized protein ycaC OS=Escherichia coli (strain K12) GN=ycaC PE=1 SV=1	ycaC	10	656.84	23067.8	2	1884	998	1416	1751	3686	2727	2658	3071	1886	1952	2602	3213	3848	4317	3329	2285	5705	1636	3138	5615	3353	1622
P04846	Lipoprotein 28 OS=Escherichia coli (strain K12) GN=nlpA PE=1 SV=1	nlpA	10	679.98	29387.4	2	1867	358	663	1213	1060	1613	1555	822	1404	976	822	697	859	593	1276	1498	1114	1629	1098	947	1059	1559
P31142	3-mercaptopyruvate sulfurtransferase OS=Escherichia coli (strain K12) GN=sseA PE=1 SV=3	sseA	10	903.66	30774.6	2	821	2205	1388	1264	1542	1391	1142	1616	1073	1070	1173	1304	702	1013	1258	893	1326	1010	1506	1352	1346	988
P77318	Uncharacterized sulfatase ydeN OS=Escherichia coli (strain K12) GN=ydeN PE=3 SV=2	ydeN	10	499.82	62745.1	2	14	147	55	136	117	527	39	84	91	133	121	72	11	11	37	18	29	26	195	266	94	18
P0AG82	Phosphate-binding protein pstS OS=Escherichia coli (strain K12) GN=pstS PE=1 SV=1	pstS	10	596.96	36983.1	2	305	301	398	230	373	421	464	425	304	264	227	200	224	236	365	464	661	416	361	296	393	380
P07821	Iron(3+)-hydroxamate import ATP-binding protein FhuC OS=Escherichia coli (strain K12) GN=fhuC PE=1 SV=3	fhuC	10	582.72	28850.1	1	154	201	NA	50	490	112	127	32	68	53	212	30	43	30	127	157	131	NA	NA	33	82	NA
P06610	Vitamin B12 transport periplasmic protein BtuE OS=Escherichia coli (strain K12) GN=btuE PE=3 SV=1	btuE	10	427.67	20438.3	2	1158	890	1111	1221	1135	1294	1184	736	905	968	1021	867	747	714	1928	827	1730	857	1032	1319	878	779
P0AEG6	Thiol:disulfide interchange protein DsbC OS=Escherichia coli (strain K12) GN=dsbC PE=1 SV=1	dsbC	10	521.12	25586.9	2	1421	1356	1195	475	711	505	626	1072	404	273	235	193	297	307	699	680	731	465	472	364	396	637
P0AEG4	Thiol:disulfide interchange protein DsbA OS=Escherichia coli (strain K12) GN=dsbA PE=1 SV=1	dsbA	10	518.39	23071.7	2	4138	4121	5262	2134	3169	3111	4309	3611	2684	1913	1553	1202	2012	2075	3201	4545	3569	2978	2993	2021	3224	4239
P77522	FeS cluster assembly protein sufB OS=Escherichia coli (strain K12) GN=sufB PE=1 SV=2	sufB	10	676.65	54692.6	2	266	224	274	215	345	348	255	273	226	359	353	223	379	375	813	530	360	543	309	443	246	311
P77499	Probable ATP-dependent transporter SufC OS=Escherichia coli (strain K12) GN=sufC PE=1 SV=1	sufC	10	704.74	27547.1	2	628	298	560	394	442	527	530	619	359	271	245	196	1002	820	2282	1139	1042	1038	603	521	451	641
P0ACA7	Uncharacterized GST-like protein yliJ OS=Escherichia coli (strain K12) GN=yliJ PE=1 SV=1	gstB	10	546.83	23680.2	2	627	364	700	802	571	672	594	597	979	943	1035	804	223	265	838	373	638	502	445	617	339	432
P0A9D2	Glutathione S-transferase OS=Escherichia coli (strain K12) GN=gst PE=1 SV=1	gstA	10	547.31	22835.8	2	685	412	505	856	779	845	787	872	770	824	865	772	574	539	1074	673	888	672	786	872	615	579
P04949	Flagellin OS=Escherichia coli (strain K12) GN=fliC PE=1 SV=2	fliC	10	640.6	51246.6	2	3	5	26	3	36	199	17	4	148	538	125	12	9	4	12	6	3	5	27	16	41	10
P69776	Major outer membrane lipoprotein Lpp OS=Escherichia coli (strain K12) GN=lpp PE=1 SV=1	lpp	10	601.85	8300.29	2	48939	65769	62401	41895	52381	78662	47094	40624	57441	59981	43689	41916	139676	81302	69550	57148	72294	71431	44925	37621	51325	53085
P02919	Penicillin-binding protein 1B OS=Escherichia coli (strain K12) GN=mrcB PE=1 SV=2	mrcB	10	528.79	88815.9	2	91	104	104	55	67	92	83	124	116	117	116	116	59	53	48	103	99	106	132	59	79	137
P17952	UDP-N-acetylmuramate--L-alanine ligase OS=Escherichia coli (strain K12) GN=murC PE=1 SV=2	murC	10	658.89	53574.4	2	435	671	438	321	330	316	342	397	283	210	204	144	288	286	418	631	513	456	359	242	361	398
P11880	UDP-N-acetylmuramoyl-tripeptide--D-alanyl-D-alanine ligase OS=Escherichia coli (strain K12) GN=murF PE=1 SV=2	murF	10	633.27	47399.6	2	530	850	664	509	487	336	475	496	417	272	232	191	213	200	445	524	557	426	337	238	263	311
P0A912	Peptidoglycan-associated lipoprotein OS=Escherichia coli (strain K12) GN=pal PE=1 SV=1	pal	10	820.78	18794.2	2	18234	21384	41190	12382	14372	21817	16182	12231	18801	14039	8776	5889	16579	15193	20806	17270	22087	23023	14028	8638	16354	17602
P60390	Ribosomal RNA small subunit methyltransferase H OS=Escherichia coli (strain K12) GN=rsmH PE=1 SV=1	rsmH	10	598.72	34838.2	2	374	498	383	308	301	282	332	430	232	185	163	165	210	222	356	556	451	449	369	302	354	439
P0ACB0	Replicative DNA helicase OS=Escherichia coli (strain K12) GN=dnaB PE=1 SV=1	dnaB	10	656.61	52339.7	2	207	320	232	162	130	137	128	131	130	125	82	75	71	71	159	147	126	154	125	108	129	164
P43329	ATP-dependent RNA helicase hrpA OS=Escherichia coli (strain K12) GN=hrpA PE=3 SV=3	hrpA	10	454.42	148917	2	32	60	42	20	21	32	23	24	37	28	28	24	11	15	16	37	23	26	26	18	24	37
P09030	Exodeoxyribonuclease III OS=Escherichia coli (strain K12) GN=xthA PE=1 SV=4	xthA	10	402.1	30931.5	2	658	834	796	441	612	566	504	502	414	487	417	426	277	286	629	508	424	415	591	467	478	440
P0AF20	N-acetylglucosamine repressor OS=Escherichia coli (strain K12) GN=nagC PE=2 SV=1	nagC	10	508.96	44495.6	2	124	234	186	100	110	137	124	104	162	137	143	140	108	117	148	231	138	143	115	172	98	129
P0A7C2	LexA repressor OS=Escherichia coli (strain K12) GN=lexA PE=1 SV=1	lexA	10	589.13	22325.9	2	560	1027	755	479	586	636	626	442	536	451	432	350	185	197	618	465	587	560	722	512	637	662
P0AFM6	Phage shock protein A OS=Escherichia coli (strain K12) GN=pspA PE=1 SV=2	pspA	10	639.35	25459.2	2	934	747	689	803	775	706	1374	1106	740	631	516	429	529	495	701	987	773	888	972	622	847	1160
P23882	Methionyl-tRNA formyltransferase OS=Escherichia coli (strain K12) GN=fmt PE=1 SV=4	fmt	10	534.27	34128.8	2	715	1587	1525	631	699	818	766	761	574	425	432	362	475	516	858	757	897	930	534	515	541	663
P60723	50S ribosomal protein L4 OS=Escherichia coli (strain K12) GN=rplD PE=1 SV=1	rplD	10	570.55	22054.9	2	21084	49874	32571	8448	14307	15594	17090	12278	15362	9934	7428	7100	8557	8382	16370	19642	16859	21040	15208	11310	17718	25286
P0ADY3	50S ribosomal protein L14 OS=Escherichia coli (strain K12) GN=rplN PE=1 SV=1	rplN	10	775.81	13514.4	2	7098	24357	16828	3744	5696	6445	7100	4228	8878	5302	4289	3851	3426	4441	7074	9119	8124	7094	3898	4125	5727	8585
P0AG44	50S ribosomal protein L17 OS=Escherichia coli (strain K12) GN=rplQ PE=1 SV=1	rplQ	10	515.63	14337.6	2	18397	46700	33515	6185	10243	13517	14757	10104	11020	7258	5663	4821	6916	9235	17097	18386	19921	16349	12528	8663	12862	19454
P60624	50S ribosomal protein L24 OS=Escherichia coli (strain K12) GN=rplX PE=1 SV=2	rplX	10	700.8	11291.3	2	49826	124761	85603	18421	30832	34179	35995	28362	30075	19183	15098	11736	12340	17271	43523	48141	45590	43091	32022	21417	34170	48202
P0A7R5	30S ribosomal protein S10 OS=Escherichia coli (strain K12) GN=rpsJ PE=1 SV=1	rpsJ	10	541.09	11710.4	2	39792	103703	67671	16172	23086	26327	28416	22616	15959	11246	8437	7300	17530	18468	32315	37190	34758	34665	23769	15396	24910	33467
P0A7S9	30S ribosomal protein S13 OS=Escherichia coli (strain K12) GN=rpsM PE=1 SV=2	rpsM	10	775.08	13073.3	2	23450	72767	39835	12255	16267	21922	21550	14456	20459	13509	9839	8541	8993	8094	15911	20691	23096	20500	13696	12913	16007	23642
P0AEI4	Ribosomal protein S12 methylthiotransferase RimO OS=Escherichia coli (strain K12) GN=rimO PE=1 SV=1	rimO	10	458.31	49532.4	2	326	809	404	112	172	161	179	132	160	119	74	55	19	16	83	196	104	170	132	74	183	213
P21151	3-ketoacyl-CoA thiolase OS=Escherichia coli (strain K12) GN=fadA PE=1 SV=3	fadA	10	924.33	40831.6	2	425	526	463	834	1138	842	508	1044	578	1218	1463	1285	280	214	265	257	242	357	1254	1288	962	353
P0AET8	7-alpha-hydroxysteroid dehydrogenase OS=Escherichia coli (strain K12) GN=hdhA PE=1 SV=1	hdhA	10	492.48	26743.6	2	197	200	202	363	254	268	234	200	217	255	303	272	313	281	491	717	845	301	298	318	255	211
P76503	3-ketoacyl-CoA thiolase OS=Escherichia coli (strain K12) GN=fadI PE=1 SV=1	fadI	10	421.61	46483.1	2	23	92	49	131	115	65	54	153	124	153	157	147	28	43	29	21	11	50	101	77	78	93
P77399	Fatty acid oxidation complex subunit alpha OS=Escherichia coli (strain K12) GN=fadJ PE=1 SV=1	fadJ	10	498.47	77005.7	2	24	87	96	97	60	171	35	108	268	116	210	191	39	45	20	19	17	34	87	37	44	34
P06983	Porphobilinogen deaminase OS=Escherichia coli (strain K12) GN=hemC PE=1 SV=2	hemC	10	517.65	33812.8	2	224	732	691	135	183	225	436	223	165	167	161	118	137	147	222	231	251	194	202	188	197	187
P0ACB7	Protein hemY OS=Escherichia coli (strain K12) GN=hemY PE=1 SV=1	hemY	10	435.37	45198.8	2	144	323	233	125	183	175	176	200	222	223	207	200	107	105	131	200	120	151	185	139	170	161
P11458	Quinolinate synthase A OS=Escherichia coli (strain K12) GN=nadA PE=1 SV=3	nadA	10	491.71	38198.2	2	368	65	1146	221	186	234	227	230	314	241	152	104	8	8	230	552	365	210	241	97	177	272
P24186	Bifunctional protein FolD OS=Escherichia coli (strain K12) GN=folD PE=1 SV=4	folD	10	732.84	31006.3	2	1861	1452	2492	1227	1384	1865	1589	1375	1397	1077	829	704	1527	1399	2496	2264	2782	2040	1312	1125	1385	1769
P0AEJ2	Isochorismate synthase entC OS=Escherichia coli (strain K12) GN=entC PE=1 SV=1	entC	10	594.73	42886.9	2	193	57	156	73	78	59	61	84	94	64	32	20	36	36	1065	129	172	403	57	20	56	73
P17993	3-demethylubiquinone-9 3-methyltransferase OS=Escherichia coli (strain K12) GN=ubiG PE=1 SV=1	ubiG	10	599.7	26520.5	2	1335	1404	1455	975	1158	1062	1118	869	1032	796	659	423	148	160	909	612	827	904	1043	538	1062	862
P75913	Glyoxylate/hydroxypyruvate reductase A OS=Escherichia coli (strain K12) GN=ghrA PE=1 SV=2	ghrA	10	658.05	35303.2	2	1020	1383	1428	727	859	873	991	847	951	809	706	546	335	351	814	864	726	1064	1026	777	981	1073
P0A7Z0	Ribose-5-phosphate isomerase A OS=Escherichia coli (strain K12) GN=rpiA PE=1 SV=1	rpiA	10	468.67	22828	2	2758	4467	3605	2367	2691	2340	2446	2578	2774	2216	1905	1600	1901	1899	3665	3837	2992	3031	2102	1956	2175	2279
P46130	Putative acyl-CoA thioester hydrolase ybhC OS=Escherichia coli (strain K12) GN=ybhC PE=1 SV=2	ybhC	10	718.47	46035.8	2	1377	1546	1436	797	1071	1051	1100	1360	916	716	652	551	726	774	1388	2515	1787	1074	928	698	1109	1255
P76143	Uncharacterized aldolase lsrF OS=Escherichia coli (strain K12) GN=lsrF PE=1 SV=1	lsrF	10	660.63	31854.1	2	88	117	122	266	336	129	67	106	104	182	357	667	319	384	140	98	90	120	90	250	253	176
P0ADG4	Inositol-1-monophosphatase OS=Escherichia coli (strain K12) GN=suhB PE=1 SV=1	suhB	10	639.59	29136	2	1439	3468	1812	730	938	941	981	749	955	646	546	494	431	456	1006	1210	1058	1050	871	594	827	1116
P08178	Phosphoribosylformylglycinamidine cyclo-ligase OS=Escherichia coli (strain K12) GN=purM PE=1 SV=3	purM	10	909.59	36812.6	2	2544	564	2487	1193	2053	2251	2295	2786	2092	1223	986	710	946	1015	2657	2717	2645	2142	1702	1752	1827	2376
P08244	Orotidine 5'-phosphate decarboxylase OS=Escherichia coli (strain K12) GN=pyrF PE=1 SV=1	pyrF	10	451.31	26315.5	2	1507	1017	906	586	1027	1181	1239	948	821	471	318	284	999	855	1867	1646	1607	1343	967	781	1255	1516
P00452-2	Isoform Alpha' of Ribonucleoside-diphosphate reductase 1 subunit alpha OS=Escherichia coli (strain K12) GN=nrdA	nrdA	10	494.01	82789.6	1	28	106	NA	5	18	24	25	9	5	6	14	2	15	5	34	17	23	NA	NA	8	9	NA
P12008	Chorismate synthase OS=Escherichia coli (strain K12) GN=aroC PE=1 SV=4	aroC	10	567.91	39095	2	798	469	539	518	659	624	690	638	722	623	503	420	393	389	895	773	699	836	591	613	676	774
P0A6J5	D-amino acid dehydrogenase small subunit OS=Escherichia coli (strain K12) GN=dadA PE=2 SV=1	dadA	10	484.9	47559	2	51	1095	1071	163	77	74	86	172	193	119	63	64	103	96	152	125	306	330	140	83	135	259
P00926	D-serine dehydratase OS=Escherichia coli (strain K12) GN=dsdA PE=1 SV=3	dsdA	10	393.37	47852.1	2	67	1431	88	28	31	32	29	22	29	20	29	20	39	21	48	76	60	29	25	15	16	23
P30126	3-isopropylmalate dehydratase small subunit OS=Escherichia coli (strain K12) GN=leuD PE=1 SV=3	leuD	10	680.37	22455.2	2	5119	461	891	6651	4886	6165	5192	3651	4035	5594	5439	6736	153	149	3855	2555	1685	5647	5465	5225	6295	5500
P31133	Putrescine-binding periplasmic protein OS=Escherichia coli (strain K12) GN=potF PE=1 SV=3	potF	10	614.48	40796	2	3029	1192	2078	2600	3574	2997	4361	4070	2849	2764	2820	2949	2244	2394	2931	2218	3636	2500	2861	3486	3170	3279
P00547	Homoserine kinase OS=Escherichia coli (strain K12) GN=thrB PE=1 SV=2	thrB	10	514.66	33583.9	2	594	442	298	380	454	690	442	841	327	208	176	151	504	320	1521	583	835	1172	231	305	400	712
P0A6D7	Shikimate kinase 1 OS=Escherichia coli (strain K12) GN=aroK PE=1 SV=2	aroK	10	565.52	19508.1	2	2112	3205	2406	887	1208	1304	1222	1058	1064	767	591	467	265	331	1725	2009	1533	1511	1247	809	1300	1555
P0ADF8	Acetolactate synthase isozyme 1 small subunit OS=Escherichia coli (strain K12) GN=ilvN PE=1 SV=1	ilvN	10	670.52	11080.6	2	1075	2811	2680	1846	1539	2082	2203	634	2551	2055	2011	2416	1387	358	2793	1156	1239	2069	1346	1382	1781	1604
P75823	Low specificity L-threonine aldolase OS=Escherichia coli (strain K12) GN=ltaE PE=1 SV=1	ltaE	10	587.83	36453.6	2	316	411	411	449	365	310	368	333	384	438	435	343	160	139	304	340	321	394	334	385	379	340
Q46863	Putative binding protein ygiS OS=Escherichia coli (strain K12) GN=ygiS PE=1 SV=1	ygiS	10	473.99	60638.2	1	47	74	NA	113	144	76	75	96	166	172	234	267	38	32	30	40	49	NA	NA	71	123	NA
P76027	Oligopeptide transport ATP-binding protein OppD OS=Escherichia coli (strain K12) GN=oppD PE=3 SV=2	oppD	10	556.37	37145.9	2	144	736	1303	84	172	168	142	165	178	172	127	135	60	56	120	135	137	200	110	83	153	130
P30860	ABC transporter arginine-binding protein 1 OS=Escherichia coli (strain K12) GN=artJ PE=1 SV=2	artJ	10	660.72	26794.7	2	9359	1294	2327	3130	4045	4802	5092	4398	4403	3477	4719	5510	1870	2150	4851	7768	4860	3735	4305	4041	3875	5880
P0A7A9	Inorganic pyrophosphatase OS=Escherichia coli (strain K12) GN=ppa PE=1 SV=2	ppa	10	663.31	19673	2	8350	14365	12756	5608	7636	8021	7571	6701	5921	5403	4449	4117	6679	6391	11137	10324	10468	9614	8214	7074	8041	9208
P0ABJ9	Cytochrome d ubiquinol oxidase subunit 1 OS=Escherichia coli (strain K12) GN=cydA PE=1 SV=1	cydA	10	647.64	58149	2	344	1399	659	428	400	663	518	338	747	772	883	1036	418	356	290	775	686	661	470	396	439	684
P0ABI8	Ubiquinol oxidase subunit 1 OS=Escherichia coli (strain K12) GN=cyoB PE=1 SV=1	cyoB	10	534.62	74300.3	2	957	2424	1909	848	1002	1113	929	1740	1466	1133	896	841	514	633	787	1331	964	1086	1025	365	1097	1340
P42593	2,4-dienoyl-CoA reductase [NADPH] OS=Escherichia coli (strain K12) GN=fadH PE=1 SV=3	fadH	10	558.77	72614.3	2	43	134	98	184	191	108	112	163	138	181	198	170	32	38	39	53	99	61	133	113	112	76
P0A8P3	Probable Fe(2+)-trafficking protein OS=Escherichia coli (strain K12) GN=yggX PE=1 SV=2	yggX	10	371.21	10927.4	2	3446	4247	3110	1613	2310	3243	2789	2659	2255	1955	1768	1519	2343	1983	4823	4561	3878	4014	2544	2526	2282	3400
P76621	Protein CsiD OS=Escherichia coli (strain K12) GN=csiD PE=1 SV=2	csiD	10	467.21	37318.9	2	56	636	619	251	218	208	226	257	329	233	181	151	13	19	45	45	51	45	136	146	145	57
P0AAT9	Uncharacterized protein ybeL OS=Escherichia coli (strain K12) GN=ybeL PE=4 SV=1	ybeL	10	508.96	18767.4	2	540	658	456	463	616	695	639	514	386	493	615	690	943	1012	593	1028	753	420	655	888	636	546
P39401	Phosphoglycerol transferase I OS=Escherichia coli (strain K12) GN=mdoB PE=3 SV=2	mdoB	10	459.54	85422.5	2	77	171	148	54	92	64	88	113	97	93	76	57	45	40	28	68	41	69	118	44	100	112
P37626	Uncharacterized protein yhiI OS=Escherichia coli (strain K12) GN=yhiI PE=4 SV=1	yhiI	9	531.68	38786.7	2	179	454	365	216	180	202	182	188	206	188	135	105	145	82	271	206	126	282	181	122	208	184
P77485	Sensor kinase CusS OS=Escherichia coli (strain K12) GN=cusS PE=1 SV=1	cusS	9	494.67	53686	2	217	173	135	263	257	121	250	263	199	221	147	159	73	72	111	216	190	186	221	239	253	276
P69407	Capsular synthesis regulator component B OS=Escherichia coli (strain K12) GN=rcsB PE=1 SV=1	rcsB	9	534.79	23637.8	2	2769	3818	3064	1535	1774	1827	2085	1899	1883	1557	1299	1259	626	747	1400	2014	2077	2243	2052	1702	2056	3021
P0AAX8	Probable L,D-transpeptidase YbiS OS=Escherichia coli (strain K12) GN=ybiS PE=1 SV=1	ybiS	9	560.61	33286.2	2	3469	3224	3426	1610	2097	2803	2574	2567	2528	1918	1508	1221	1439	1130	3181	3246	3265	2823	2411	1852	2660	3104
P0A8X2	Protein yceI OS=Escherichia coli (strain K12) GN=yceI PE=1 SV=1	yceI	9	617	20881.6	2	2094	580	993	1409	1594	1102	2090	1954	1028	1033	1014	611	616	614	1329	903	779	737	1543	1038	1194	1397
P0A8H6	Der GTPase-activating protein YihI OS=Escherichia coli (strain K12) GN=yihI PE=1 SV=1	yihI	9	722.88	19029.7	2	1175	1804	2692	735	1003	856	980	1003	978	651	548	537	801	846	1203	1381	1106	921	1016	774	999	1048
P77649	UPF0061 protein ydiU OS=Escherichia coli (strain K12) GN=ydiU PE=1 SV=1	ydiU	9	555.53	54329.9	1	70	88	NA	30	59	52	67	34	34	81	22	51	15	14	89	85	66	NA	NA	30	49	NA
P37691	Uncharacterized protein yibQ OS=Escherichia coli (strain K12) GN=yibQ PE=4 SV=2	yibQ	9	490.55	35312.4	1	126	76	NA	66	51	148	55	11	67	40	32	34	149	64	71	36	78	NA	NA	27	48	NA
P0AFH8	Osmotically-inducible protein Y OS=Escherichia coli (strain K12) GN=osmY PE=1 SV=1	osmY	9	698.94	21042.9	2	10489	5064	6777	6009	3645	9120	5204	2656	5095	3150	3010	2452	38846	27274	38126	12896	38124	7446	5372	4802	3274	6326
P75874	Uncharacterized protein yccU OS=Escherichia coli (strain K12) GN=yccU PE=1 SV=2	yccU	9	627.88	14673.7	2	1847	1578	2333	1506	1687	1945	1792	976	1326	1366	1532	1353	2747	3312	4135	1882	3173	2512	3566	5166	2955	2631
P45470	Protein yhbO OS=Escherichia coli (strain K12) GN=yhbO PE=1 SV=2	yhbO	9	428.88	18828.9	2	288	214	185	336	312	308	284	245	296	247	292	432	693	810	989	424	764	292	297	660	195	206
P0A8Y5	Phosphatase YidA OS=Escherichia coli (strain K12) GN=yidA PE=1 SV=1	yidA	9	394.61	29684.2	2	511	644	436	165	219	370	306	163	218	141	96	68	272	214	485	357	533	415	273	175	252	362
P0AGE6	Uncharacterized protein yieF OS=Escherichia coli (strain K12) GN=yieF PE=3 SV=1	yieF	9	459.37	20344.6	2	1687	2331	1447	2670	2152	1641	1663	1924	1944	1840	1746	1873	1773	2351	2940	1806	3816	2258	2218	1940	1490	1394
Q47679	UPF0012 hydrolase yafV OS=Escherichia coli (strain K12) GN=yafV PE=3 SV=1	yafV	9	438.84	28888.5	1	219	80	NA	114	70	83	87	57	56	81	37	52	22	38	101	61	180	NA	NA	47	61	NA
P75863	Uncharacterized protein ycbX OS=Escherichia coli (strain K12) GN=ycbX PE=1 SV=1	ycbX	9	519.81	40600.6	2	212	308	253	123	175	213	242	197	160	159	161	172	73	61	181	153	189	243	249	193	219	286
P0A9W9	Protein YrdA OS=Escherichia coli (strain K12) GN=yrdA PE=1 SV=1	yrdA	9	579.62	20214.3	2	840	872	795	285	468	653	610	545	209	245	282	172	111	336	781	634	1083	667	963	587	628	1036
P36649	Blue copper oxidase CueO OS=Escherichia coli (strain K12) GN=cueO PE=1 SV=2	cueO	9	504.84	56501.4	2	1034	424	1060	649	1012	521	995	779	724	627	516	426	164	176	486	1084	1234	616	808	727	802	657
P0ABU5	Enhancing lycopene biosynthesis protein 2 OS=Escherichia coli (strain K12) GN=elbB PE=1 SV=1	elbB	9	586.57	22948.8	2	1274	3515	3337	1811	1950	1767	1737	1781	1753	1849	1508	1555	982	1082	2261	1630	1614	2216	1833	1656	1768	1560
P0ADI4	Isochorismatase OS=Escherichia coli (strain K12) GN=entB PE=1 SV=1	entB	9	335.83	32515.3	2	243	91	241	99	151	139	164	203	82	78	75	59	245	159	2681	218	665	1019	122	123	166	179
P64604	Probable phospholipid ABC transporter-binding protein mlaD OS=Escherichia coli (strain K12) GN=mlaD PE=1 SV=1	mlaD	9	548.1	19546.1	2	1098	1912	1518	526	725	1010	971	1002	691	540	470	521	1349	1053	1305	1953	1117	1237	1258	644	1122	1044
P0A9A9	Ferric uptake regulation protein OS=Escherichia coli (strain K12) GN=fur PE=1 SV=1	fur	9	695.04	16766.3	2	6492	10748	8408	3805	5665	6661	5760	5617	5207	4303	4175	3546	4004	3659	7461	6874	6963	7179	5782	4476	5421	6453
P61517	Carbonic anhydrase 2 OS=Escherichia coli (strain K12) GN=can PE=1 SV=1	can	9	712.03	25062.8	2	3642	2319	2775	2124	2137	2539	2566	2538	2151	1545	1276	1052	2587	2445	6376	4720	8238	3445	2450	2105	2308	3300
P31060	Putative molybdenum transport ATP-binding protein ModF OS=Escherichia coli (strain K12) GN=modF PE=3 SV=2	modF	9	495.84	54484.3	2	233	53	51	121	127	145	194	128	241	211	190	135	38	88	191	160	193	155	181	125	159	249
P0AG78	Sulfate-binding protein OS=Escherichia coli (strain K12) GN=sbp PE=1 SV=1	sbp	9	550	36618.8	2	1357	567	800	1106	623	1593	1244	561	646	413	374	313	441	445	630	995	1303	648	919	650	621	1664
P39172	High-affinity zinc uptake system protein znuA OS=Escherichia coli (strain K12) GN=znuA PE=1 SV=4	znuA	9	405.72	33738.2	2	434	567	269	95	230	105	219	132	91	95	63	52	84	108	201	214	113	169	139	124	251	243
P0A6L9	Co-chaperone protein hscB OS=Escherichia coli (strain K12) GN=hscB PE=1 SV=1	hscB	9	517.52	20107.2	2	845	983	818	370	447	470	533	485	593	424	295	313	183	190	643	612	503	472	300	238	254	368
P42620	Uncharacterized protein yqjG OS=Escherichia coli (strain K12) GN=yqjG PE=3 SV=1	yqjG	9	469.36	37344.6	2	107	117	138	131	104	137	89	68	69	94	140	180	222	199	143	95	129	51	80	165	76	51
P0A746	Peptide methionine sulfoxide reductase msrB OS=Escherichia coli (strain K12) GN=msrB PE=1 SV=1	msrB	9	516.21	15423.2	2	1301	1263	1186	1547	1871	1871	1474	1722	1752	1588	1313	1245	473	354	1161	1641	1059	1083	1302	1258	1515	1072
P76104	Uncharacterized protease ydcP OS=Escherichia coli (strain K12) GN=ydcP PE=1 SV=2	ydcP	9	332.91	72638.3	1	27	61	NA	1	11	6	9	4	3	3	8	4	2	4	12	27	7	NA	NA	1	12	NA
P02918	Penicillin-binding protein 1A OS=Escherichia coli (strain K12) GN=mrcA PE=1 SV=1	mrcA	9	465.65	93559.4	2	31	49	33	24	29	39	19	33	36	32	30	30	21	45	91	63	19	51	55	21	70	94
P0A917	Outer membrane protein X OS=Escherichia coli (strain K12) GN=ompX PE=1 SV=1	ompX	9	589.03	18572.9	2	22443	25278	13367	6152	5648	8640	8241	5475	5305	3690	3364	2847	11782	22838	33362	19135	34300	19546	7763	7081	5377	12511
P0A905	Outer membrane lipoprotein slyB OS=Escherichia coli (strain K12) GN=slyB PE=2 SV=1	slyB	9	609.67	15574.1	2	14116	17259	17652	9998	11241	11486	13810	12760	9203	8284	8146	8728	13372	12104	15266	17024	18348	10959	10843	9001	10213	13390
P76397	Multidrug resistance protein mdtA OS=Escherichia coli (strain K12) GN=mdtA PE=2 SV=2	mdtA	9	375.27	44419.4	2	126	70	92	114	119	109	121	84	70	62	53	54	75	75	89	211	114	133	118	111	103	144
P0C0S1	Small-conductance mechanosensitive channel OS=Escherichia coli (strain K12) GN=mscS PE=1 SV=1	mscS	9	533.46	30858.7	2	2854	3440	4577	1640	2243	3932	3041	2948	3375	2039	1719	1422	1663	1724	2538	4246	3925	2823	2040	1806	3125	3422
P0A6W5	Transcription elongation factor greA OS=Escherichia coli (strain K12) GN=greA PE=1 SV=1	greA	9	616.61	17612.1	2	2449	6565	4127	1635	1950	2354	2433	1989	2090	1808	1462	1390	875	856	2144	2318	2562	2499	1995	1485	2122	2664
P13445	RNA polymerase sigma factor rpoS OS=Escherichia coli (strain K12) GN=rpoS PE=3 SV=3	rpoS	9	703.86	37930.7	2	219	1347	656	114	111	151	186	76	316	305	271	182	78	81	200	79	198	105	122	143	97	147
P0ABF1	Poly(A) polymerase OS=Escherichia coli (strain K12) GN=pcnB PE=1 SV=2	pcnB	9	400.91	53819.1	2	43	74	39	13	24	27	33	28	81	55	40	28	17	27	34	52	28	41	25	21	34	44
P0A7J3	50S ribosomal protein L10 OS=Escherichia coli (strain K12) GN=rplJ PE=1 SV=2	rplJ	9	464.84	17682.4	2	34448	87283	58270	14819	22663	25318	28260	19565	22631	14446	12848	9878	17512	16954	33767	33399	34162	31998	19984	15860	24014	32861
P0AA10	50S ribosomal protein L13 OS=Escherichia coli (strain K12) GN=rplM PE=1 SV=1	rplM	9	606.86	15990.5	2	31492	74846	49501	13480	21165	23871	24514	18322	21083	14032	10619	8508	14617	13254	29300	33319	31278	28117	20837	14141	22223	30872
P0A7K6	50S ribosomal protein L19 OS=Escherichia coli (strain K12) GN=rplS PE=1 SV=2	rplS	9	491.83	13107.2	2	5503	16521	12660	2860	4424	6438	5222	4216	8207	5087	4070	3118	3429	2699	3525	8391	5727	7019	4162	2440	4434	8591
P0AA43	Ribosomal small subunit pseudouridine synthase A OS=Escherichia coli (strain K12) GN=rsuA PE=1 SV=1	rsuA	9	550.85	25831.2	2	1510	1816	1605	818	1120	1123	1257	911	947	813	655	531	737	601	1595	1578	1351	1509	1079	816	1115	1479
P00960	Glycyl-tRNA synthetase alpha subunit OS=Escherichia coli (strain K12) GN=glyQ PE=1 SV=2	glyQ	9	680.57	34734.2	2	1660	3682	2521	913	1197	1315	1220	1146	1218	987	822	701	497	475	1155	1517	1236	1498	1214	1058	1434	1609
P0ADB1	Osmotically-inducible lipoprotein E OS=Escherichia coli (strain K12) GN=osmE PE=2 SV=1	osmE	9	531.27	11994.9	2	4610	3304	4605	6882	6596	6053	5306	3769	8216	8717	11727	11560	11780	13695	17256	6831	8149	5404	5502	11728	4737	3098
P37440	Oxidoreductase ucpA OS=Escherichia coli (strain K12) GN=ucpA PE=1 SV=3	ucpA	9	621.91	27814.3	2	122	1962	688	387	473	300	269	324	389	454	416	441	113	118	131	86	91	204	463	283	538	193
P12996	Biotin synthase OS=Escherichia coli (strain K12) GN=bioB PE=1 SV=2	bioB	9	716.85	38605.2	2	366	94	771	93	176	140	186	73	149	61	49	32	42	12	81	190	46	198	125	107	222	242
P60716	Lipoyl synthase OS=Escherichia coli (strain K12) GN=lipA PE=1 SV=1	lipA	9	519.88	36030.3	2	437	2685	1428	455	721	661	548	860	469	498	379	345	208	44	247	288	483	600	542	433	830	836
P0AFU8	Riboflavin synthase alpha chain OS=Escherichia coli (strain K12) GN=ribE PE=1 SV=1	ribC	9	520.09	23412	2	746	970	879	624	484	708	612	472	610	464	435	290	395	345	1027	1022	849	867	504	481	540	742
P0AEN1	NAD(P)H-flavin reductase OS=Escherichia coli (strain K12) GN=fre PE=1 SV=2	fre	9	687.25	26207.3	2	643	1302	1188	629	747	815	719	757	799	653	611	515	377	276	1015	733	917	767	746	716	872	830
P0AC86	Glycogen phosphorylase OS=Escherichia coli (strain K12) GN=glgP PE=3 SV=1	glgP	9	692.64	93096.1	2	135	116	128	164	141	132	146	190	220	188	186	214	130	163	128	153	228	153	155	132	117	162
P0AF18	N-acetylglucosamine-6-phosphate deacetylase OS=Escherichia coli (strain K12) GN=nagA PE=1 SV=1	nagA	9	565.69	40905.1	2	282	752	375	380	427	638	406	394	354	413	462	449	293	398	538	427	448	382	559	1594	469	415
P0AF24	Protein nagD OS=Escherichia coli (strain K12) GN=nagD PE=1 SV=1	nagD	9	623.44	27127.7	2	1268	1368	1581	705	860	943	1028	1045	854	714	672	557	825	571	943	1368	948	939	1098	891	1070	1258
P09099	Xylulose kinase OS=Escherichia coli (strain K12) GN=xylB PE=1 SV=1	xylB	9	615.97	52566.6	2	48	44	51	38	43	51	45	42	36	44	48	59	28	47	54	64	53	2004	56	44	40	42
P39173	Putative glucose-6-phosphate 1-epimerase OS=Escherichia coli (strain K12) GN=yeaD PE=1 SV=2	yeaD	9	916.95	32627.6	2	2162	2422	3431	1491	1673	2016	2078	1375	2142	1633	1095	739	798	823	2137	2174	1832	1943	1731	1109	1689	3562
P15067	Glycogen debranching enzyme OS=Escherichia coli (strain K12) GN=glgX PE=1 SV=3	glgX	9	469.37	73512.5	2	111	75	135	111	81	81	95	99	77	76	72	74	75	76	66	86	129	84	82	95	78	63
P68187	Maltose/maltodextrin import ATP-binding protein MalK OS=Escherichia coli (strain K12) GN=malK PE=1 SV=1	malK	9	657.81	40946.6	2	87	398	250	94	171	225	131	159	569	655	608	378	20	22	22	23	25	42	221	128	139	113
P04983	Ribose import ATP-binding protein RbsA OS=Escherichia coli (strain K12) GN=rbsA PE=1 SV=1	rbsA	9	508.33	54988.7	2	18	78	90	37	62	56	54	114	90	117	114	173	42	59	35	36	18	29	49	51	68	45
P37387	D-xylose-binding periplasmic protein OS=Escherichia coli (strain K12) GN=xylF PE=1 SV=1	xylF	9	566.21	35693.7	2	94	147	157	190	347	179	138	206	176	357	462	504	59	45	53	75	49	7455	278	393	211	103
P0ABF6	Cytidine deaminase OS=Escherichia coli (strain K12) GN=cdd PE=1 SV=1	cdd	9	492.97	31501.9	2	257	3380	199	245	281	282	211	186	253	315	345	442	745	848	664	514	825	330	324	198	234	199
P0A9M2	Hypoxanthine phosphoribosyltransferase OS=Escherichia coli (strain K12) GN=hpt PE=1 SV=1	hpt	9	472.36	20084.4	2	1285	2475	1611	532	706	878	839	753	676	582	432	350	433	491	1379	770	943	940	665	676	911	1173
P0A8F4	Uridine kinase OS=Escherichia coli (strain K12) GN=udk PE=3 SV=1	udk	9	377.47	24319.6	2	192	445	334	137	210	162	205	171	239	167	136	106	96	105	190	207	243	219	173	140	208	246
P69924	Ribonucleoside-diphosphate reductase 1 subunit beta OS=Escherichia coli (strain K12) GN=nrdB PE=1 SV=2	nrdB	9	584.64	43471.7	2	449	832	814	377	400	484	394	406	466	396	330	277	266	219	420	584	465	420	389	306	369	478
P0A7F3	Aspartate carbamoyltransferase regulatory chain OS=Escherichia coli (strain K12) GN=pyrI PE=1 SV=2	pyrI	9	744.73	17091.9	2	19076	3040	2441	12205	22168	18039	20656	12007	21282	13699	8248	6717	10332	10178	24335	13728	21077	16664	15268	19667	23854	18076
P04391	Ornithine carbamoyltransferase chain I OS=Escherichia coli (strain K12) GN=argI PE=1 SV=3	argI	9	1071.73	36865.5	2	805	71	137	336	414	341	413	281	472	354	444	605	47	36	563	372	473	532	362	278	368	463
P07623	Homoserine O-succinyltransferase OS=Escherichia coli (strain K12) GN=metA PE=1 SV=4	metA	9	553.76	35687	2	2687	370	361	492	711	827	917	808	893	701	589	501	299	279	1404	1452	2353	1653	984	835	1111	1262
P0A7F6	S-adenosylmethionine decarboxylase proenzyme OS=Escherichia coli (strain K12) GN=speD PE=1 SV=1	speD	9	602.17	30347.1	2	1780	2106	1425	451	854	985	827	574	784	500	339	257	340	434	1223	1308	1039	949	684	496	786	1054
P0ADT5	Uncharacterized protein ygiC OS=Escherichia coli (strain K12) GN=ygiC PE=4 SV=1	ygiC	9	321.32	44979.2	2	386	440	394	219	389	250	442	460	220	207	177	159	130	116	271	316	177	305	383	188	326	420
P0A9S3	Galactitol-1-phosphate 5-dehydrogenase OS=Escherichia coli (strain K12) GN=gatD PE=3 SV=1	gatD	9	589.42	37348.3	2	128	1229	653	1085	938	623	618	610	780	1321	1206	1282	95	93	149	239	104	354	746	722	918	411
P00894	Acetolactate synthase isozyme 3 small subunit OS=Escherichia coli (strain K12) GN=ilvH PE=1 SV=3	ilvH	9	590.6	17947.7	2	1533	439	456	902	958	1451	1246	1335	1078	855	826	715	798	629	1403	1435	1595	1823	1591	1287	1401	1931
P0A9S7	High-affinity branched-chain amino acid transport ATP-binding protein LivG OS=Escherichia coli (strain K12) GN=livG PE=3 SV=1	livG	9	490.56	28390.9	2	203	171	102	169	292	349	305	239	469	433	335	306	101	102	175	201	165	249	249	259	359	359
P77737	Oligopeptide transport ATP-binding protein OppF OS=Escherichia coli (strain K12) GN=oppF PE=3 SV=1	oppF	9	394.25	37155.6	2	57	445	800	21	72	71	53	60	96	80	70	53	5	6	20	57	31	65	34	35	69	65
P75914	Putative hydrolase ycdX OS=Escherichia coli (strain K12) GN=ycdX PE=1 SV=1	ycdX	9	423.55	26855.4	2	239	221	262	153	226	199	222	276	207	201	166	129	88	110	344	277	311	273	176	149	173	232
P29131	Cell division protein ftsN OS=Escherichia coli (strain K12) GN=ftsN PE=1 SV=3	ftsN	9	469.93	35753.4	2	172	261	189	124	202	187	170	178	182	177	180	191	114	104	178	245	162	196	202	192	156	247
P0AF08	Protein mrp OS=Escherichia coli (strain K12) GN=mrp PE=3 SV=1	mrp	9	575.07	39894.5	2	1317	2075	1451	704	864	1007	933	909	797	576	470	414	499	417	925	1617	1494	1069	883	731	953	1215
P0A6U3	tRNA uridine 5-carboxymethylaminomethyl modification enzyme MnmG OS=Escherichia coli (strain K12) GN=mnmG PE=1 SV=1	mnmG	9	371.07	69459.7	2	84	171	122	50	71	74	77	65	99	86	56	49	21	33	77	125	75	106	75	62	88	101
P0ACD4	NifU-like protein OS=Escherichia coli (strain K12) GN=nifU PE=1 SV=1	iscU	9	494.3	13821.8	2	9431	8769	12783	6815	6641	6275	9007	6898	10152	6805	4830	3123	549	492	13917	11947	7162	12781	9389	7740	6388	12349
P33232	L-lactate dehydrogenase [cytochrome] OS=Escherichia coli (strain K12) GN=lldD PE=1 SV=1	lldD	9	551.7	42682.9	2	148	1027	286	304	318	293	272	219	369	337	309	373	516	483	205	324	236	267	327	401	361	262
P0AFC7	NADH-quinone oxidoreductase subunit B OS=Escherichia coli (strain K12) GN=nuoB PE=1 SV=1	nuoB	9	473.2	25021.4	2	305	1281	897	267	522	576	517	380	438	411	387	301	62	41	155	246	248	231	341	214	286	348
P0A6E6	ATP synthase epsilon chain OS=Escherichia coli (strain K12) GN=atpC PE=1 SV=2	atpC	9	754.25	15040.7	2	10112	15370	21432	7138	11551	11472	12009	12894	8472	7101	5402	4130	3439	4340	8136	9940	6690	10339	11267	7045	11302	12777
P00363	Fumarate reductase flavoprotein subunit OS=Escherichia coli (strain K12) GN=frdA PE=1 SV=3	frdA	9	545.2	65911.6	2	37	408	242	105	221	54	61	64	86	100	94	120	18	22	41	59	35	55	79	64	222	65
P52647	Probable pyruvate-flavodoxin oxidoreductase OS=Escherichia coli (strain K12) GN=ydbK PE=3 SV=2	ydbK	9	405.85	128725	2	65	197	87	47	50	94	60	41	62	59	66	90	34	41	54	69	97	52	51	39	65	83
P37749	Uncharacterized protein yefG OS=Escherichia coli (strain K12) GN=yefG PE=4 SV=1	wbbI	9	565.39	37715.1	2	789	2028	1291	379	484	562	564	562	649	512	380	266	190	155	427	622	624	677	588	351	566	754
P62768	UPF0325 protein yaeH OS=Escherichia coli (strain K12) GN=yaeH PE=3 SV=1	yaeH	9	412.95	15068.9	2	1708	1478	1914	1944	2442	2205	2539	2181	2202	2309	2316	2338	2521	2236	3425	3496	3367	2443	2203	2175	1983	2092
P27305	Glutamyl-Q tRNA(Asp) synthetase OS=Escherichia coli (strain K12) GN=gluQ PE=1 SV=6	gluQ	9	415.47	34827.9	1	48	166	NA	27	69	42	44	46	51	54	158	38	7	12	45	32	41	NA	NA	16	46	NA
P13016	1,6-anhydro-N-acetylmuramyl-L-alanine amidase AmpD OS=Escherichia coli (strain K12) GN=ampD PE=2 SV=1	ampD	8	462.43	20505.2	1	167	166	NA	117	100	290	106	121	116	200	51	90	118	25	84	87	73	NA	NA	101	129	NA
P77619	UPF0214 protein yfeW OS=Escherichia coli (strain K12) GN=yfeW PE=3 SV=2	yfeW	8	422.01	47704	1	14	43	NA	7	19	39	19	16	20	71	85	52	31	7	10	102	19	NA	NA	11	36	NA
P69425	Sec-independent protein translocase protein tatB OS=Escherichia coli (strain K12) GN=tatB PE=1 SV=1	tatB	8	385.36	18391.6	2	648	1060	1083	441	633	653	585	677	503	496	370	348	464	490	943	785	793	685	678	592	621	657
P77754	Spheroplast protein Y OS=Escherichia coli (strain K12) GN=spy PE=1 SV=1	spy	8	348.3	18169.3	2	424	444	501	805	612	761	622	863	379	443	367	388	168	169	538	1304	321	354	554	761	533	623
P0AEC3	Aerobic respiration control sensor protein ArcB OS=Escherichia coli (strain K12) GN=arcB PE=1 SV=1	arcB	8	357.55	87909.6	2	50	122	76	55	54	65	51	67	62	55	58	51	41	27	68	51	90	65	54	50	55	54
P15078	Carbon starvation protein A OS=Escherichia coli (strain K12) GN=cstA PE=1 SV=3	cstA	8	408.98	75037.6	2	361	978	1582	1952	2599	2010	2120	2119	4408	5823	5893	5510	125	189	308	255	136	466	3193	1886	2464	1233
P45955	Uncharacterized protein YbgF OS=Escherichia coli (strain K12) GN=ybgF PE=1 SV=2	ybgF	8	458.91	28196.1	2	1385	1448	2006	806	866	776	999	917	702	550	543	491	394	806	666	617	501	310	322	308	371	509
P27431	Uncharacterized protein ycfD OS=Escherichia coli (strain K12) GN=ycfD PE=4 SV=2	ycfD	8	391.54	42534	2	821	972	1000	635	722	771	862	637	639	560	498	501	629	638	865	595	816	741	696	715	693	670
P76576	UPF0070 protein yfgM OS=Escherichia coli (strain K12) GN=yfgM PE=3 SV=1	yfgM	8	544.81	22144.4	2	1013	1559	1523	497	636	765	724	734	554	519	401	369	416	367	913	924	722	952	725	501	666	781
P0A8A4	Putative phosphotransferase ydiA OS=Escherichia coli (strain K12) GN=ydiA PE=1 SV=1	ppsR	8	508.25	31173.1	2	293	357	369	310	348	245	281	461	259	240	199	178	169	196	352	366	411	416	333	304	437	275
P76187	Oxidoreductase YdhF OS=Escherichia coli (strain K12) GN=ydhF PE=1 SV=2	ydhF	8	405.07	33636.3	2	296	478	361	529	347	496	287	272	586	565	648	957	338	182	192	308	269	242	312	345	228	321
P32705	Cation/acetate symporter ActP OS=Escherichia coli (strain K12) GN=actP PE=1 SV=1	actP	8	307.97	59140.4	2	40	113	226	336	1018	378	248	269	629	1405	1656	1913	64	48	61	55	59	57	686	678	632	88
P56262	Putative carboxymethylenebutenolidase OS=Escherichia coli (strain K12) GN=ysgA PE=3 SV=3	ysgA	8	468.94	29388.8	2	682	482	757	1440	1193	1063	1116	943	1378	1172	1138	874	573	589	1468	774	1127	700	1537	1158	1187	962
P0A998	Ferritin-1 OS=Escherichia coli (strain K12) GN=ftnA PE=1 SV=1	ftnA	8	522.87	19393.4	2	3237	5282	1478	860	1071	2390	1315	1139	1160	1124	1011	762	352	427	829	1372	769	1013	1240	811	937	1359
P36659	Curved DNA-binding protein OS=Escherichia coli (strain K12) GN=cbpA PE=1 SV=2	cbpA	8	465.02	34415.7	2	131	363	243	199	119	147	123	96	121	128	129	159	303	275	127	241	709	119	114	124	102	71
P23869	Peptidyl-prolyl cis-trans isomerase B OS=Escherichia coli (strain K12) GN=ppiB PE=1 SV=2	ppiB	8	336.07	18123.9	2	2305	3457	1738	1532	2295	2225	2563	2037	1998	1665	1465	1119	2552	2355	4241	5243	5103	3553	2092	1718	2157	2951
P0A9K9	FKBP-type peptidyl-prolyl cis-trans isomerase slyD OS=Escherichia coli (strain K12) GN=slyD PE=1 SV=1	slyD	8	571.53	20821.7	2	19681	28739	22833	10756	14443	14150	15259	14564	13684	10279	9264	7321	4740	4565	15129	8922	14630	12565	14140	8530	11822	13362
P77395	Uncharacterized protein ybbN OS=Escherichia coli (strain K12) GN=ybbN PE=1 SV=2	ybbN	8	562.12	31753.3	2	2692	4289	3670	1525	1751	1910	2264	1828	1829	1529	1205	897	1363	1326	2567	2242	2279	2141	2068	1321	1772	1989
P30870	Glutamate-ammonia-ligase adenylyltransferase OS=Escherichia coli (strain K12) GN=glnE PE=1 SV=2	glnE	8	388.38	108332	2	25	29	33	25	33	55	36	37	56	63	66	53	20	20	41	75	41	40	46	48	39	65
P0A6G7	ATP-dependent Clp protease proteolytic subunit OS=Escherichia coli (strain K12) GN=clpP PE=1 SV=1	clpP	8	743.25	23153.6	2	8821	12106	10478	6199	6894	6731	7175	6346	6432	5355	5069	4031	4373	4750	8456	8171	8240	8269	7997	4286	5261	6136
P0C0L2	Peroxiredoxin osmC OS=Escherichia coli (strain K12) GN=osmC PE=1 SV=2	osmC	8	441.62	15060.7	2	7596	3286	3475	11419	9204	11914	8157	6045	6963	8625	13343	16056	34689	33770	24792	9757	17702	6900	9098	24113	8037	5578
P05852	Probable O-sialoglycoprotein endopeptidase OS=Escherichia coli (strain K12) GN=gcp PE=3 SV=2	tsaD	8	231.6	35967.5	2	199	484	236	87	85	102	105	89	116	88	64	58	46	50	116	126	117	118	87	94	113	144
P04951	3-deoxy-manno-octulosonate cytidylyltransferase OS=Escherichia coli (strain K12) GN=kdsB PE=1 SV=2	kdsB	8	511.83	27579.1	2	546	913	896	290	356	428	407	455	340	249	196	193	272	274	578	555	662	438	334	318	470	550
P0ADA3	Lipoprotein nlpD OS=Escherichia coli (strain K12) GN=nlpD PE=1 SV=1	nlpD	8	429.71	40106.4	2	344	426	364	181	301	253	319	322	227	245	189	176	212	153	430	604	393	349	253	241	217	253
P25740	Lipopolysaccharide core biosynthesis protein rfaG OS=Escherichia coli (strain K12) GN=rfaG PE=1 SV=1	rfaG	8	301.05	42239.5	1	49	102	NA	18	15	50	31	9	15	8	13	5	3	2	21	40	19	NA	NA	7	22	NA
P75864	Ribosomal RNA large subunit methyltransferase L OS=Escherichia coli (strain K12) GN=rlmL PE=1 SV=1	rlmL	8	449.7	78786.5	2	102	258	140	74	64	86	73	98	129	104	85	85	56	34	50	87	58	69	71	31	63	92
P0A812	Holliday junction ATP-dependent DNA helicase ruvB OS=Escherichia coli (strain K12) GN=ruvB PE=1 SV=1	ruvB	8	435.32	37132.4	2	235	346	292	170	179	164	172	180	155	139	129	107	42	28	157	171	111	147	177	121	152	162
P45799	ADP compounds hydrolase nudE OS=Escherichia coli (strain K12) GN=nudE PE=1 SV=1	nudE	8	457.86	21121.8	2	561	565	639	323	469	477	448	548	401	337	272	208	259	200	605	472	496	553	483	347	544	485
P0A780	N utilization substance protein B OS=Escherichia coli (strain K12) GN=nusB PE=1 SV=1	nusB	8	325.98	15661.3	2	1086	2372	1813	845	1050	946	969	955	928	798	686	549	647	777	1546	1311	1575	1569	1144	1146	1356	1805
P0A7Y0	Ribonuclease 3 OS=Escherichia coli (strain K12) GN=rnc PE=1 SV=1	rnc	8	495.69	25516.3	2	654	1224	910	466	601	518	592	494	602	464	410	321	343	268	698	749	585	722	436	455	580	701
P75960	NAD-dependent deacetylase OS=Escherichia coli (strain K12) GN=cobB PE=1 SV=2	cobB	8	436.15	26681.4	2	594	728	783	490	571	718	695	634	558	492	489	385	527	367	984	981	1212	852	681	543	772	785
P24255	RNA polymerase sigma-54 factor OS=Escherichia coli (strain K12) GN=rpoN PE=3 SV=2	rpoN	8	495.03	53938.4	2	298	399	324	180	230	234	236	228	220	205	181	180	156	116	266	254	241	241	197	187	179	212
P0A800	DNA-directed RNA polymerase subunit omega OS=Escherichia coli (strain K12) GN=rpoZ PE=1 SV=1	rpoZ	8	764.9	10212.4	2	9115	16564	14725	5259	7265	7622	7346	6861	7208	5904	4427	4301	5490	5390	10481	9655	9887	8917	7499	6887	9813	9265
P0ACM5	Uncharacterized HTH-type transcriptional regulator yegW OS=Escherichia coli (strain K12) GN=yegW PE=1 SV=1	yegW	8	379.32	28241.7	1	65	67	NA	41	76	69	39	54	64	90	53	26	18	19	46	45	73	NA	NA	35	67	NA
P0ACP1	Fructose repressor OS=Escherichia coli (strain K12) GN=fruR PE=1 SV=1	cra	8	542.92	37957.7	2	148	371	236	258	304	217	253	321	289	323	296	353	85	89	92	153	124	178	291	240	320	277
P0A6N4	Elongation factor P OS=Escherichia coli (strain K12) GN=efp PE=1 SV=2	efp	8	444.12	20560.4	2	17940	38972	24946	8031	13404	12147	14569	12381	11292	8615	6563	5335	8323	7952	16216	12137	16261	16773	12713	9758	15105	15772
P0A7R1	50S ribosomal protein L9 OS=Escherichia coli (strain K12) GN=rplI PE=1 SV=1	rplI	8	695.32	15741.5	2	34889	83961	54652	13616	21806	26455	25920	19854	19789	14342	11452	8298	20336	16559	31118	34797	35399	30487	21894	13941	20011	31999
P0A7K2	50S ribosomal protein L7/L12 OS=Escherichia coli (strain K12) GN=rplL PE=1 SV=2	rplL	8	542.05	12269.5	2	61706	145619	99230	24297	34912	41161	40710	32244	32000	21561	17286	14559	35793	33915	63816	64947	61451	47705	36374	23952	35375	48724
P0A7M2	50S ribosomal protein L28 OS=Escherichia coli (strain K12) GN=rpmB PE=1 SV=2	rpmB	8	424.16	8982.86	2	9795	21000	13553	4190	5302	7392	6072	5074	9471	6518	4535	4289	3599	1917	3685	6968	6656	8049	8108	4671	10367	11940
P0AG51	50S ribosomal protein L30 OS=Escherichia coli (strain K12) GN=rpmD PE=1 SV=2	rpmD	8	291.23	6519.63	2	8298	21048	13855	3402	4871	5744	7308	4155	5308	3215	2675	1959	3813	3191	6200	6808	7445	6556	5369	3818	5708	8789
P39406	Ribosomal RNA small subunit methyltransferase C OS=Escherichia coli (strain K12) GN=rsmC PE=1 SV=3	rsmC	8	524.41	37583.1	2	665	502	634	311	395	413	503	419	413	299	246	231	213	167	367	532	507	455	347	398	487	620
P32695	tRNA-dihydrouridine synthase A OS=Escherichia coli (strain K12) GN=dusA PE=3 SV=3	dusA	8	447.68	36768.4	2	198	436	219	66	106	132	108	115	117	88	81	57	49	38	101	143	81	87	93	76	102	99
P0A6N8	Elongation factor P-like protein OS=Escherichia coli (strain K12) GN=yeiP PE=1 SV=1	yeiP	8	519.16	21501	2	3519	4507	5739	1539	2358	2648	2920	2131	1886	1357	1028	840	695	549	2276	2634	2555	1875	2002	1964	2187	2877
P0AGJ5	Uncharacterized tRNA/rRNA methyltransferase YfiF OS=Escherichia coli (strain K12) GN=yfiF PE=3 SV=1	yfiF	8	638.45	37743	2	1126	1504	1298	690	919	1120	1095	874	976	835	878	765	833	849	1301	1317	1467	1096	1091	978	1049	1303
P45568	1-deoxy-D-xylulose 5-phosphate reductoisomerase OS=Escherichia coli (strain K12) GN=dxr PE=1 SV=2	dxr	8	383.48	43341.9	1	72	135	NA	33	46	49	58	72	48	50	361	15	10	42	31	107	59	NA	NA	17	54	NA
P15047	2,3-dihydro-2,3-dihydroxybenzoate dehydrogenase OS=Escherichia coli (strain K12) GN=entA PE=1 SV=1	entA	8	412.42	26215.3	2	142	41	161	52	74	82	88	119	43	25	21	22	203	212	909	143	368	360	96	57	140	150
P0A6I3	Pantothenate kinase OS=Escherichia coli (strain K12) GN=coaA PE=1 SV=1	coaA	8	346.47	36319	2	275	508	418	145	260	222	247	288	160	143	139	101	71	54	135	145	150	189	241	178	271	217
P08192	Bifunctional protein folC OS=Escherichia coli (strain K12) GN=folC PE=1 SV=2	folC	8	500.57	45359.4	2	364	633	564	173	247	279	279	237	234	180	148	114	86	212	263	301	332	212	212	139	241	266
P0ACB2	Delta-aminolevulinic acid dehydratase OS=Escherichia coli (strain K12) GN=hemB PE=1 SV=2	hemB	8	334.72	35583.9	2	440	819	498	328	356	439	375	377	338	269	257	222	264	275	476	464	659	500	350	341	348	399
P12281	Molybdopterin molybdenumtransferase OS=Escherichia coli (strain K12) GN=moeA PE=1 SV=1	moeA	8	644.3	44021.6	2	539	703	512	435	428	447	429	439	320	284	260	215	344	368	537	646	932	522	416	412	328	424
P19624	4-hydroxythreonine-4-phosphate dehydrogenase OS=Escherichia coli (strain K12) GN=pdxA PE=1 SV=1	pdxA	8	377.06	35073.5	2	184	178	159	142	153	177	166	175	115	106	97	81	107	75	266	185	237	190	133	129	142	159
P0A7I7	GTP cyclohydrolase-2 OS=Escherichia coli (strain K12) GN=ribA PE=1 SV=1	ribA	8	320.03	21804.2	2	311	529	374	192	261	331	257	272	212	151	118	91	147	174	339	279	444	251	188	133	184	252
P61714	6,7-dimethyl-8-ribityllumazine synthase OS=Escherichia coli (strain K12) GN=ribH PE=1 SV=1	ribE	8	523.73	16128.6	2	7341	10894	11480	5093	5241	5981	5615	5145	5387	3848	2540	2135	3330	3658	6459	4398	6965	6328	5044	3152	5591	5655
P0A9B6	D-erythrose-4-phosphate dehydrogenase OS=Escherichia coli (strain K12) GN=epd PE=1 SV=2	epd	8	336.65	37258.2	2	112	210	155	56	80	64	111	82	84	54	39	30	41	26	48	86	43	65	32	28	47	70
P0AEW9	1-phosphofructokinase OS=Escherichia coli (strain K12) GN=fruK PE=3 SV=1	fruK	8	482.77	33716.3	2	56	166	111	24	55	97	84	42	114	79	68	78	39	62	101	80	67	144	78	85	84	2465
P15977	4-alpha-glucanotransferase OS=Escherichia coli (strain K12) GN=malQ PE=3 SV=2	malQ	8	380.51	78435.2	2	65	84	66	29	48	58	61	43	101	84	74	45	14	14	24	24	34	31	74	43	42	78
P77541	Methylisocitrate lyase OS=Escherichia coli (strain K12) GN=prpB PE=1 SV=3	prpB	8	458.8	32096.5	2	23	36	25	25	487	293	11	21	23	947	757	491	285	238	61	84	54	59	84	853	111	40
P28904	Trehalose-6-phosphate hydrolase OS=Escherichia coli (strain K12) GN=treC PE=3 SV=3	treC	8	318.97	63779.1	2	4	484	51	5	9	10	8	9	5	9	11	13	13	6	13	13	4	11	12	20	7	14
P77739	Uncharacterized protein yniA OS=Escherichia coli (strain K12) GN=yniA PE=3 SV=1	yniA	8	570.95	32420.2	2	194	294	156	365	339	333	331	293	232	369	561	681	368	389	305	251	339	193	417	465	348	192
P39208	Thermosensitive gluconokinase OS=Escherichia coli (strain K12) GN=idnK PE=3 SV=1	idnK	8	364.4	20972.7	1	15	23	NA	6	16	1724	12	18	8	44	17	7	16	10	13	39	17	NA	NA	5	12	NA
P0A9J6	Ribokinase OS=Escherichia coli (strain K12) GN=rbsK PE=1 SV=1	rbsK	8	448.01	32252.8	2	66	483	310	123	160	151	180	175	197	179	168	139	41	44	42	90	80	66	166	138	164	126
P22333	Adenosine deaminase OS=Escherichia coli (strain K12) GN=add PE=3 SV=2	add	8	458.91	36356.7	2	253	1603	801	118	180	142	205	124	257	412	571	512	56	65	264	206	197	361	337	600	242	231
P69503	Adenine phosphoribosyltransferase OS=Escherichia coli (strain K12) GN=apt PE=1 SV=1	apt	8	624.39	19828.6	2	3061	6371	2720	973	1278	1534	1787	1324	1489	995	696	556	759	846	2332	1845	2186	1965	1380	679	1460	1921
P0A763	Nucleoside diphosphate kinase OS=Escherichia coli (strain K12) GN=ndk PE=1 SV=2	ndk	8	602.36	15435.8	2	11665	18896	44585	17235	22964	17281	17326	15320	21146	16525	11996	8266	2900	2388	8718	9171	7393	14483	27707	14374	29653	18745
P0A7E9	Uridylate kinase OS=Escherichia coli (strain K12) GN=pyrH PE=1 SV=2	pyrH	8	363.32	25935.5	2	710	829	1021	441	593	550	631	573	668	423	314	223	189	368	671	587	550	705	624	473	678	547
P10371	1-(5-phosphoribosyl)-5-[(5-phosphoribosylamino)methylideneamino] imidazole-4-carboxamide isomerase OS=Escherichia coli (strain K12) GN=hisA PE=1 SV=2	hisA	8	600.87	25998.6	2	2121	600	3026	690	1015	1187	1633	1315	989	884	837	566	358	476	1259	1483	1047	750	935	773	984	1074
P60595	Imidazole glycerol phosphate synthase subunit hisH OS=Escherichia coli (strain K12) GN=hisH PE=1 SV=1	hisH	8	428.78	21620.8	2	1575	754	1919	442	742	880	1229	883	824	676	708	438	518	617	955	1507	1059	959	993	789	859	1049
P0A9L8	Pyrroline-5-carboxylate reductase OS=Escherichia coli (strain K12) GN=proC PE=1 SV=1	proC	8	553.13	28108.5	2	549	813	685	467	551	530	450	402	711	708	713	781	349	387	722	660	579	544	376	669	402	367
P30744	L-serine dehydratase 2 OS=Escherichia coli (strain K12) GN=sdaB PE=1 SV=2	sdaB	8	645.53	48703.5	2	37	2367	205	15	19	18	21	19	18	16	11	11	6	6	18	13	14	12	12	19	25	34
P21169	Ornithine decarboxylase, constitutive OS=Escherichia coli (strain K12) GN=speC PE=1 SV=2	speC	8	412.38	79347.9	2	86	59	75	34	63	52	93	103	45	36	28	27	17	15	34	58	66	66	42	34	46	62
P08390	USG-1 protein OS=Escherichia coli (strain K12) GN=usg PE=1 SV=1	usg	8	461.08	36323.5	2	456	583	443	261	254	328	326	251	409	327	317	273	220	194	437	543	460	386	326	283	287	357
P0AB80	Branched-chain-amino-acid aminotransferase OS=Escherichia coli (strain K12) GN=ilvE PE=1 SV=2	ilvE	8	684.89	34054.1	2	2609	1389	1625	1255	1728	1834	1899	1970	2366	1435	919	795	1939	1902	5169	2633	3511	4021	1638	1158	1967	2943
P76316	D-cysteine desulfhydrase OS=Escherichia coli (strain K12) GN=dcyD PE=1 SV=4	dcyD	8	591.1	35113.2	2	987	891	876	638	830	1015	787	693	766	681	568	556	599	639	914	800	1221	746	733	682	670	727
P76128	Probable D,D-dipeptide-binding periplasmic protein ddpA OS=Escherichia coli (strain K12) GN=ddpA PE=2 SV=1	ddpA	8	416	57587.2	2	16	18	30	43	88	39	37	44	33	67	70	80	67	63	17	12	11	17	103	132	98	18
P63235	Probable glutamate/gamma-aminobutyrate antiporter OS=Escherichia coli (strain K12) GN=gadC PE=1 SV=1	gadC	8	352.36	55022.5	2	62	88	59	140	49	108	32	32	65	69	63	74	1559	1589	64	32	1278	16	8	18	14	11
P60651	Agmatinase OS=Escherichia coli (strain K12) GN=speB PE=1 SV=1	speB	8	862.72	33517.6	2	1283	2427	5775	900	1112	904	2217	918	938	760	793	971	596	683	844	682	994	774	779	827	797	932
P07913	L-threonine 3-dehydrogenase OS=Escherichia coli (strain K12) GN=tdh PE=1 SV=1	tdh	8	455.57	37196.8	2	181	2388	1511	628	377	293	239	264	214	264	227	225	100	95	134	194	211	339	328	267	390	247
P0A729	Maf-like protein yceF OS=Escherichia coli (strain K12) GN=yceF PE=3 SV=1	yceF	8	550.92	21659.2	2	2340	3657	3227	2410	3042	3171	3119	2063	2968	2837	3497	3266	2621	2770	3650	3986	5715	2615	2801	4069	2273	2411
P0A9R4	2Fe-2S ferredoxin OS=Escherichia coli (strain K12) GN=fdx PE=1 SV=2	fdx	8	427.59	12304.8	2	2742	6442	5650	2072	2145	1885	2528	2058	1891	1831	1346	1286	483	459	1960	3141	2920	2439	1883	1644	2066	2777
P0A9S5	Glycerol dehydrogenase OS=Escherichia coli (strain K12) GN=gldA PE=1 SV=1	gldA	8	386.23	38669.7	2	54	54	35	56	40	34	36	42	47	53	63	74	53	55	42	43	36	22	22	51	25	17
P08201	Nitrite reductase [NAD(P)H] large subunit OS=Escherichia coli (strain K12) GN=nirB PE=3 SV=4	nirB	8	439.9	93044.2	2	3	12	4	3	3	4	3	3	3	2	2	2	1	3	4	21	4	2	5	2	3	5
P45579	Uncharacterized oxidoreductase YbdH OS=Escherichia coli (strain K12) GN=ybdH PE=3 SV=2	ybdH	8	488.88	39049.3	2	727	509	332	462	455	430	658	364	575	321	390	312	60	46	176	382	220	345	465	342	498	629
P33219	Protein yebF OS=Escherichia coli (strain K12) GN=yebF PE=1 SV=2	yebF	8	382.19	12935.6	2	1716	850	2077	1445	2082	1781	1721	1001	1931	1770	1633	1192	1506	681	2776	1260	1607	1070	1952	1574	1621	1142
P31063	Uncharacterized lipoprotein yedD OS=Escherichia coli (strain K12) GN=yedD PE=4 SV=1	yedD	8	520.33	14955.7	2	1666	2349	2544	1145	1234	1524	1511	1267	1316	1175	1043	865	1189	1397	1926	1648	1920	1770	1655	1340	1467	1908
P0ADT8	Uncharacterized protein ygiM OS=Escherichia coli (strain K12) GN=ygiM PE=4 SV=1	ygiM	8	353.07	23044.1	2	273	289	158	149	202	119	206	353	98	99	122	168	106	119	282	367	387	270	260	280	266	247
P0A7A2	Probable phosphoglycerate mutase gpmB OS=Escherichia coli (strain K12) GN=gpmB PE=1 SV=1	gpmB	8	496.66	24032.3	2	365	601	598	305	434	358	361	378	334	303	258	209	52	78	313	405	359	436	448	315	553	469
P0A8S1	Chromosome initiation inhibitor OS=Escherichia coli (strain K12) GN=iciA PE=1 SV=1	iciA	8	509.46	33432.5	2	625	391	426	410	495	548	545	625	417	409	336	332	348	310	715	689	625	679	597	528	445	626
P68066	Autonomous glycyl radical cofactor OS=Escherichia coli (strain K12) GN=grcA PE=1 SV=1	grcA	8	510.56	14257.4	2	901	2365	1613	1269	1339	1355	1418	3557	945	980	785	703	365	388	1088	4235	6870	1769	1711	863	1251	1307
P24202	Mrr restriction system protein OS=Escherichia coli (strain K12) GN=mrr PE=1 SV=1	mrr	7	345.39	33481.2	2	34	119	102	40	45	57	57	60	56	50	37	23	8	7	31	51	28	41	52	20	48	49
P0AGA2	Preprotein translocase subunit SecY OS=Escherichia coli (strain K12) GN=secY PE=1 SV=1	secY	7	328.27	48462.2	2	651	1282	983	352	492	610	561	627	853	678	535	570	294	288	418	777	490	602	477	347	557	742
P0ABV2	Biopolymer transport protein exbD OS=Escherichia coli (strain K12) GN=exbD PE=1 SV=1	exbD	7	289.84	15498.9	2	368	267	507	142	221	215	282	239	210	115	92	59	164	97	920	454	597	569	193	157	262	339
P0AG86	Protein-export protein SecB OS=Escherichia coli (strain K12) GN=secB PE=1 SV=1	secB	7	692.23	17248.2	2	16735	27911	32743	11594	10740	14184	11828	11832	13572	14120	10686	8605	7121	6689	14124	12126	12145	11177	11737	8726	10181	12641
P0AFB8	Nitrogen regulation protein NR(I) OS=Escherichia coli (strain K12) GN=glnG PE=3 SV=1	glnG	7	427.29	52204.3	2	129	70	65	40	61	57	64	51	57	42	54	63	12	65	76	76	141	54	65	84	50	67
P69228	Transcriptional regulatory protein BaeR OS=Escherichia coli (strain K12) GN=baeR PE=3 SV=1	baeR	7	457.39	27620.6	2	276	188	217	164	171	193	181	131	136	118	113	90	94	148	341	435	317	272	180	196	152	218
P0AE88	Transcriptional regulatory protein CpxR OS=Escherichia coli (strain K12) GN=cpxR PE=1 SV=1	cpxR	7	461.2	26277.8	2	933	875	931	954	894	861	784	1146	709	729	660	833	951	920	952	1019	937	1005	1110	1361	1102	1144
P52108	Transcriptional regulatory protein rstA OS=Escherichia coli (strain K12) GN=rstA PE=2 SV=2	rstA	7	289.71	26669	2	243	278	295	175	183	135	221	248	118	120	93	106	66	61	149	194	264	211	153	163	188	944
P0AG24	Bifunctional (p)ppGpp synthase/hydrolase SpoT OS=Escherichia coli (strain K12) GN=spoT PE=1 SV=1	spoT	7	368.47	79274.2	2	14	39	33	16	15	26	15	20	38	40	37	36	12	9	15	21	11	10	13	10	9	22
P0ACZ8	Transcriptional regulatory protein CusR OS=Escherichia coli (strain K12) GN=cusR PE=1 SV=1	cusR	7	547.82	25360.5	2	929	53	69	886	980	308	1059	744	541	449	349	336	53	43	129	723	384	505	949	1091	869	981
P52076	Transcriptional regulatory protein qseB OS=Escherichia coli (strain K12) GN=qseB PE=2 SV=1	qseB	7	468.55	24644.1	1	70	269	NA	42	27	83	60	27	29	83	97	25	32	28	48	53	54	NA	NA	30	43	NA
P0AEH5	Protein elaB OS=Escherichia coli (strain K12) GN=elaB PE=1 SV=1	elaB	7	399.97	11280.8	2	7256	2925	3685	10569	9193	9311	8191	6223	8111	10328	10681	12740	18731	21169	19361	10262	17243	6191	8701	12429	6742	5080
P0AFP6	UPF0135 protein ybgI OS=Escherichia coli (strain K12) GN=ybgI PE=1 SV=1	ybgI	7	701.83	26857.7	2	4327	4293	5932	4487	4298	4222	5174	4293	4525	4545	4233	3864	2508	2906	6366	5159	7115	4832	4862	4833	4756	4979
P34209	Protein ydcF OS=Escherichia coli (strain K12) GN=ydcF PE=1 SV=3	ydcF	7	380.39	29669	2	240	130	131	199	206	188	211	296	181	176	210	231	84	99	270	262	207	232	270	309	169	223
P0A8A0	UPF0082 protein yebC OS=Escherichia coli (strain K12) GN=yebC PE=1 SV=1	yebC	7	335.62	26387.9	2	792	1894	1267	386	528	575	584	491	574	455	350	319	515	520	1199	795	886	808	561	434	545	687
P0ADU2	Probable quinol monooxygenase ygiN OS=Escherichia coli (strain K12) GN=ygiN PE=1 SV=1	ygiN	7	317.49	11506.8	2	610	714	569	572	508	614	530	480	455	387	330	287	864	893	1179	1239	1731	739	488	395	497	574
P0ADV1	Lipopolysaccharide export system protein lptA OS=Escherichia coli (strain K12) GN=lptA PE=1 SV=1	lptA	7	334.64	20096.4	2	1083	1496	1414	784	1020	1130	1087	1043	767	755	719	695	1249	1164	1449	1342	1409	1133	997	1176	996	1075
P27434	Cytoskeleton protein rodZ OS=Escherichia coli (strain K12) GN=rodZ PE=1 SV=2	rodZ	7	658.98	36151.4	2	1543	2051	1684	1017	1412	1423	1525	1628	1412	1335	1144	1417	1349	1318	1475	1842	1562	1729	1596	1655	1622	1873
Q57261	tRNA pseudouridine synthase D OS=Escherichia coli (strain K12) GN=truD PE=1 SV=1	truD	7	343.24	39049.2	2	233	294	220	144	162	125	170	161	143	128	117	111	81	90	157	320	232	165	160	75	147	171
P67603	UPF0267 protein yqfB OS=Escherichia coli (strain K12) GN=yqfB PE=1 SV=1	yqfB	7	253.29	11879.9	2	700	1070	1084	1069	1005	913	890	1089	905	799	768	662	438	497	910	1010	931	891	871	655	784	823
P76053	Uncharacterized protein ydaL OS=Escherichia coli (strain K12) GN=ydaL PE=4 SV=1	ydaL	7	310.67	21481.1	1	57	116	NA	26	78	51	49	41	47	51	99	21	81	27	46	71	41	NA	NA	21	47	NA
P0AEY5	Modulator of drug activity B OS=Escherichia coli (strain K12) GN=mdaB PE=1 SV=1	mdaB	7	398.58	21858.9	2	447	574	596	442	421	565	579	443	561	433	349	247	144	121	1241	1136	1070	777	539	313	528	785
P0A9G8	Transcriptional regulator modE OS=Escherichia coli (strain K12) GN=modE PE=1 SV=1	modE	7	344.82	28245.8	2	135	310	197	89	96	121	95	101	81	77	73	71	63	49	94	101	99	106	67	75	62	98
P77529	Uncharacterized symporter ydjN OS=Escherichia coli (strain K12) GN=ydjN PE=3 SV=1	ydjN	7	434.92	48612.5	2	2230	971	1826	729	1128	1613	984	1383	2874	2100	1337	1286	617	506	1827	3180	2259	1865	1120	811	1282	2130
P0AD05	Uncharacterized protein yecA OS=Escherichia coli (strain K12) GN=yecA PE=4 SV=1	yecA	7	345.43	25005.1	2	803	945	682	681	562	525	574	629	665	589	558	499	143	97	625	396	418	552	428	583	367	368
P31064	UPF0394 inner membrane protein yedE OS=Escherichia coli (strain K12) GN=yedE PE=1 SV=1	yedE	7	429.51	44381.3	2	23	19	154	55	102	120	83	70	342	301	181	144	38	11	21	44	20	53	93	42	86	76
P0ADP0	Uncharacterized protein yigB OS=Escherichia coli (strain K12) GN=yigB PE=4 SV=1	yigB	7	411.12	27086.9	2	247	249	291	157	187	202	200	248	153	130	89	57	70	76	204	228	180	174	206	115	210	163
P30863	2,5-diketo-D-gluconic acid reductase B OS=Escherichia coli (strain K12) GN=dkgB PE=1 SV=2	dkgB	7	290.04	29400.4	2	91	120	158	76	82	118	131	74	86	75	56	60	79	199	214	152	135	133	90	60	79	103
P0ADR6	Ribosomal RNA large subunit methyltransferase M OS=Escherichia coli (strain K12) GN=rlmM PE=1 SV=1	rlmM	7	267.65	41860.1	2	122	167	117	61	67	69	84	90	72	68	57	51	25	26	44	100	53	68	84	65	62	98
P24203	Uncharacterized GTP-binding protein YjiA OS=Escherichia coli (strain K12) GN=yjiA PE=1 SV=3	yjiA	7	501.31	35619.2	2	165	451	268	209	209	253	269	540	193	168	146	102	86	83	172	222	190	203	231	164	231	218
P37634	Uncharacterized protein yhiR OS=Escherichia coli (strain K12) GN=yhiR PE=1 SV=1	rlmJ	7	362.16	31903.8	2	302	540	419	116	171	203	186	147	146	116	100	83	130	155	255	174	215	204	175	143	168	217
P10378	Enterobactin synthase component E OS=Escherichia coli (strain K12) GN=entE PE=3 SV=3	entE	7	337.04	59057.1	2	92	26	114	48	68	75	58	86	45	38	30	24	145	162	537	96	146	289	75	50	114	101
P0ABI4	Magnesium transport protein CorA OS=Escherichia coli (strain K12) GN=corA PE=1 SV=1	corA	7	479.64	36548.5	2	276	483	352	195	229	414	332	349	502	452	630	657	220	195	147	356	169	183	324	352	215	296
P0ABB8	Magnesium-transporting ATPase, P-type 1 OS=Escherichia coli (strain K12) GN=mgtA PE=1 SV=1	mgtA	7	431.95	99384.8	2	65	155	60	17	98	94	78	109	43	52	82	135	36	32	77	44	41	68	49	81	82	66
P30750	Methionine import ATP-binding protein MetN OS=Escherichia coli (strain K12) GN=metN PE=1 SV=4	metN	7	586.2	37746.7	2	1090	674	753	551	864	968	1085	1046	1322	876	906	900	537	500	817	1134	1059	1075	879	802	766	1346
P0AG27	Uncharacterized protein yibN OS=Escherichia coli (strain K12) GN=yibN PE=1 SV=1	yibN	7	401.32	15568.5	2	1372	3472	3323	870	1668	1820	1539	1428	1447	1212	1015	806	642	512	949	1214	1216	1591	1256	1239	1288	1722
Q46871	Uncharacterized protein yqjH OS=Escherichia coli (strain K12) GN=yqjH PE=4 SV=1	yqjH	7	352.84	28835.5	2	435	497	618	414	458	426	421	385	472	298	256	227	584	438	727	681	624	490	347	347	439	487
P0A6F9	10 kDa chaperonin OS=Escherichia coli (strain K12) GN=groS PE=1 SV=1	groS	7	391.84	10362.6	2	14801	42738	38016	12215	17010	14968	18543	13723	14111	12165	9436	8604	22617	19215	16624	48136	23586	19228	15044	9715	20291	14976
P63020	Fe/S biogenesis protein nfuA OS=Escherichia coli (strain K12) GN=nfuA PE=1 SV=1	nfuA	7	614.61	20966.3	2	3753	6623	6316	2195	2736	3845	3317	2968	2841	2335	1578	1284	2772	2135	6698	5058	6448	4694	3049	2230	2964	4075
P05458	Protease 3 OS=Escherichia coli (strain K12) GN=ptrA PE=1 SV=1	ptrA	7	393.64	107623	2	49	30	31	28	36	27	35	48	25	28	24	26	3	8	12	15	17	19	29	28	23	34
P0ADX1	Protein yhfA OS=Escherichia coli (strain K12) GN=yhfA PE=1 SV=1	yhfA	7	409.72	14489.3	2	438	325	381	379	426	401	417	412	510	440	399	366	245	312	575	336	676	428	363	395	365	434
P25894	Uncharacterized metalloprotease yggG OS=Escherichia coli (strain K12) GN=yggG PE=1 SV=2	loiP	7	529.37	26807.2	2	454	764	749	327	637	655	526	488	582	490	476	502	395	383	318	659	666	491	643	648	569	590
P07862	D-alanine--D-alanine ligase B OS=Escherichia coli (strain K12) GN=ddlB PE=1 SV=3	ddlB	7	336.14	32800.8	2	511	912	614	498	467	457	472	516	381	337	293	271	777	389	575	962	1138	622	530	446	462	526
P17115	Protein gutQ OS=Escherichia coli (strain K12) GN=gutQ PE=3 SV=3	gutQ	7	251.59	33991.6	2	55	108	93	57	69	45	63	61	70	58	46	42	26	32	46	92	47	62	47	35	48	47
P61320	Outer-membrane lipoprotein lolB OS=Escherichia coli (strain K12) GN=lolB PE=1 SV=1	lolB	7	338.14	23518	2	256	255	271	246	283	223	289	214	227	193	142	119	153	183	281	216	335	273	272	247	295	282
P0A908	MltA-interacting protein OS=Escherichia coli (strain K12) GN=mipA PE=1 SV=1	mipA	7	387.2	27795.5	2	3328	6840	4978	1885	2273	2471	2349	1984	2127	1773	1370	949	937	1505	3076	3106	3300	2310	2203	1344	2604	2424
P0AEU7	Chaperone protein skp OS=Escherichia coli (strain K12) GN=skp PE=1 SV=1	skp	7	643.65	17659.3	2	8224	13249	11928	3792	5704	9332	5343	5874	6814	5664	4707	4636	10066	6373	11973	6663	20656	8867	6458	6587	6494	7774
P0AD12	Protein yeeZ OS=Escherichia coli (strain K12) GN=yeeZ PE=1 SV=1	yeeZ	7	446.74	29643.2	2	327	247	186	202	186	207	216	238	244	230	228	212	201	209	331	372	401	304	251	225	152	273
P51981	L-Ala-D/L-Glu epimerase OS=Escherichia coli (strain K12) GN=ycjG PE=1 SV=2	ycjG	7	371.23	34633.9	1	102	62	NA	142	135	204	96	94	122	139	186	153	23	56	67	73	92	NA	NA	116	92	NA
P0AFV4	Lipoprotein spr OS=Escherichia coli (strain K12) GN=spr PE=1 SV=1	mepS	7	349.3	21008.8	2	1782	417	657	1530	3067	595	2407	3230	1567	1326	986	629	133	132	217	587	235	410	2817	1884	3549	2418
P03004	Chromosomal replication initiator protein dnaA OS=Escherichia coli (strain K12) GN=dnaA PE=1 SV=2	dnaA	7	308.11	52500.2	2	66	134	88	51	75	68	77	59	98	74	58	59	25	25	50	106	46	74	75	46	66	79
P0A988	DNA polymerase III subunit beta OS=Escherichia coli (strain K12) GN=dnaN PE=1 SV=1	dnaN	7	366.17	40542.7	2	577	906	803	385	519	505	534	463	468	368	320	283	224	253	589	982	519	648	446	396	386	520
P0A6C1	Endonuclease 4 OS=Escherichia coli (strain K12) GN=nfo PE=1 SV=1	nfo	7	533.47	31441.7	2	205	281	340	124	149	228	198	205	188	155	127	107	266	211	506	435	446	375	237	245	226	262
P0AGE0	Single-stranded DNA-binding protein OS=Escherichia coli (strain K12) GN=ssb PE=1 SV=2	ssb	7	310.61	18945.2	2	3612	8232	6586	2083	3307	4153	3257	3385	2812	2868	2584	2151	2139	2085	3716	3834	4805	3938	3234	2517	3019	4037
P0A6Y1	Integration host factor subunit beta OS=Escherichia coli (strain K12) GN=ihfB PE=1 SV=1	ihfB	7	663.38	10626.5	2	5360	4383	4169	3432	4050	4936	4563	4392	3820	3669	3530	4278	6260	6636	6470	6760	8089	4303	4527	4467	3699	4501
P0AFI2	DNA topoisomerase 4 subunit A OS=Escherichia coli (strain K12) GN=parC PE=1 SV=1	parC	7	471.21	83760.4	2	125	268	133	62	68	90	95	109	132	100	73	61	34	40	60	125	70	98	112	56	89	139
P0A8V6	Fatty acid metabolism regulator protein OS=Escherichia coli (strain K12) GN=fadR PE=1 SV=2	fadR	7	474.45	26933.9	2	186	428	404	148	179	308	215	223	234	215	185	187	175	75	198	158	233	232	220	187	198	220
P0ACI0	Right origin-binding protein OS=Escherichia coli (strain K12) GN=rob PE=1 SV=1	rob	7	339.39	33105.8	2	102	185	112	115	113	108	119	97	126	132	137	158	42	70	63	133	111	67	80	88	65	79
P0A8W2	Transcriptional regulator slyA OS=Escherichia coli (strain K12) GN=slyA PE=3 SV=1	slyA	7	451.86	16324.9	2	785	784	694	695	759	787	668	786	893	743	614	509	468	643	1090	1286	935	929	784	507	773	639
P0ACU7	HTH-type transcriptional regulator yjdC OS=Escherichia coli (strain K12) GN=yjdC PE=1 SV=1	yjdC	7	342.5	21899	2	520	323	440	560	520	551	538	528	425	484	552	456	191	281	711	681	539	449	484	476	275	291
P03024	HTH-type transcriptional regulator galR OS=Escherichia coli (strain K12) GN=galR PE=1 SV=1	galR	7	383.61	37052.7	1	64	97	NA	37	56	53	68	48	38	29	11	16	7	18	24	34	36	NA	NA	26	23	NA
P0AGK8	HTH-type transcriptional regulator iscR OS=Escherichia coli (strain K12) GN=iscR PE=1 SV=1	iscR	7	666.97	17307.9	2	7687	7128	11688	4233	5207	5483	7084	6510	7181	4632	3916	2947	223	345	8214	4004	3097	7912	6878	3329	3458	5222
P0ACR9	Transcriptional repressor mprA OS=Escherichia coli (strain K12) GN=mprA PE=2 SV=1	mprA	7	254.63	20532.3	2	1085	1735	1377	566	711	524	762	812	682	411	256	174	278	369	1280	2339	768	1292	718	364	913	1115
P0ACT6	HTH-type transcriptional regulator uidR OS=Escherichia coli (strain K12) GN=uidR PE=4 SV=1	uidR	7	337.3	21767	1	139	140	NA	74	243	121	53	76	69	535	10	433	27	41	37	92	53	NA	NA	76	97	NA
P16384	tRNA dimethylallyltransferase OS=Escherichia coli (strain K12) GN=miaA PE=1 SV=2	miaA	7	274.97	35025.2	2	80	92	79	60	54	44	65	84	33	28	29	19	24	20	36	115	54	65	60	36	37	70
P0A7G2	Ribosome-binding factor A OS=Escherichia coli (strain K12) GN=rbfA PE=1 SV=2	rbfA	7	442.77	15126.8	2	1535	3095	2212	991	1136	1276	1223	1046	1071	873	794	720	760	917	1360	1786	1576	1210	1067	912	1002	1120
P02413	50S ribosomal protein L15 OS=Escherichia coli (strain K12) GN=rplO PE=1 SV=1	rplO	7	461.54	14953.3	2	6986	19396	14837	3390	5169	6861	6175	5163	9696	6463	5344	4183	3889	3546	4326	11041	6795	7921	5083	3435	4945	11295
P61175	50S ribosomal protein L22 OS=Escherichia coli (strain K12) GN=rplV PE=1 SV=1	rplV	7	634.1	12200.8	2	49717	137404	85361	18436	29804	37101	40812	29108	35822	23088	17301	15806	14090	17484	37374	51747	44674	39652	30563	19384	32937	45726
P0A7M9	50S ribosomal protein L31 OS=Escherichia coli (strain K12) GN=rpmE PE=1 SV=1	rpmE	7	431.1	7847.91	2	8141	55159	35630	5738	9677	14870	9798	7528	12726	9459	7671	6208	12043	10364	26358	14016	24529	13418	4957	7325	8071	13236
P60340	tRNA pseudouridine synthase B OS=Escherichia coli (strain K12) GN=truB PE=1 SV=1	truB	7	366.62	35047.1	2	77	182	156	54	69	67	69	79	76	57	58	45	10	13	30	46	28	43	52	33	38	54
P25745	tRNA-specific 2-thiouridylase mnmA OS=Escherichia coli (strain K12) GN=mnmA PE=1 SV=4	mnmA	7	692.18	40915.6	2	500	617	421	254	287	329	329	244	334	251	243	144	209	139	376	432	335	330	217	145	197	299
P0A7X6	Ribosome maturation factor rimM OS=Escherichia coli (strain K12) GN=rimM PE=1 SV=1	rimM	7	188.95	20574.3	2	776	1686	1279	377	535	524	514	437	468	361	258	226	142	171	490	780	517	617	443	330	479	561
P63177	23S rRNA (guanosine-2'-O-)-methyltransferase RlmB OS=Escherichia coli (strain K12) GN=rlmB PE=1 SV=1	rlmB	7	415.83	26521.8	2	471	742	554	215	270	303	406	334	263	218	192	163	186	131	342	426	269	290	281	203	194	320
P33643	Ribosomal large subunit pseudouridine synthase D OS=Escherichia coli (strain K12) GN=rluD PE=1 SV=4	rluD	7	377.89	37080.2	2	391	513	532	317	247	237	201	266	275	271	224	212	125	113	264	366	303	186	194	158	176	197
P0A951	Spermidine N(1)-acetyltransferase OS=Escherichia coli (strain K12) GN=speG PE=1 SV=2	speG	7	228.82	21855.1	2	90	161	130	58	84	70	75	84	104	77	63	57	37	28	47	208	57	89	68	53	62	84
P07649	tRNA pseudouridine synthase A OS=Escherichia coli (strain K12) GN=truA PE=1 SV=1	truA	7	337.69	30362.5	1	45	206	NA	30	73	55	32	579	39	42	49	4	9	7	41	90	60	NA	NA	21	43	NA
P0AF93	RutC family protein yjgF OS=Escherichia coli (strain K12) GN=yjgF PE=1 SV=2	ridA	7	470.21	13585.1	2	9263	18215	16609	9735	11111	7937	8991	8026	11281	8351	5447	5119	9945	9770	16176	11542	13381	11144	8507	6935	10935	8309
P0A6Q3	3-hydroxydecanoyl-[acyl-carrier-protein] dehydratase OS=Escherichia coli (strain K12) GN=fabA PE=1 SV=2	fabA	7	470.49	18938.7	2	2067	5841	5340	1007	1926	3105	2122	1387	2561	1880	1783	1515	2333	1685	2381	2194	2183	1926	2084	1649	2261	2201
P0A6Q6	(3R)-hydroxymyristoyl-[acyl-carrier-protein] dehydratase OS=Escherichia coli (strain K12) GN=fabZ PE=1 SV=1	fabZ	7	648.83	17003.9	2	4930	9123	6919	2793	3074	4652	4211	3318	5000	3851	3287	2858	2597	2928	6068	5768	5143	5677	4842	3688	3997	5631
P41407	FMN-dependent NADH-azoreductase OS=Escherichia coli (strain K12) GN=azoR PE=1 SV=3	azoR	7	418.66	21626.3	2	802	448	483	625	1019	510	752	411	732	443	276	155	72	80	1373	1418	956	1693	982	415	807	1118
P31808	Uncharacterized oxidoreductase yciK OS=Escherichia coli (strain K12) GN=yciK PE=1 SV=3	yciK	7	336.44	27897	2	319	237	202	139	184	211	245	221	194	188	176	167	114	115	321	442	361	285	223	213	171	279
P37769	2-dehydro-3-deoxy-D-gluconate 5-dehydrogenase OS=Escherichia coli (strain K12) GN=kduD PE=3 SV=2	kduD	7	261.21	27034.8	1	52	60	NA	25	43	49	29	36	24	39	55	7	7	33	15	42	22	NA	NA	23	31	NA
P0A794	Pyridoxine 5'-phosphate synthase OS=Escherichia coli (strain K12) GN=pdxJ PE=1 SV=2	pdxJ	7	784.35	26349.5	2	645	994	890	638	632	878	754	783	689	743	1036	1035	2272	2283	2052	3024	2746	1792	1471	1372	1615	1577
P76290	tRNA (cmo5U34)-methyltransferase OS=Escherichia coli (strain K12) GN=cmoA PE=1 SV=1	cmoA	7	310.5	27740.9	2	556	499	453	260	333	380	397	271	347	201	202	207	206	161	399	612	393	439	287	249	262	323
P0A9J4	2-dehydropantoate 2-reductase OS=Escherichia coli (strain K12) GN=panE PE=1 SV=1	panE	7	424.38	33831.3	1	25	63	NA	12	17	19	61	11	17	16	32	10	35	21	54	30	36	NA	NA	5	22	NA
P0A7J0	3,4-dihydroxy-2-butanone 4-phosphate synthase OS=Escherichia coli (strain K12) GN=ribB PE=1 SV=1	ribB	7	529.58	23320.5	2	371	1382	2260	231	351	449	631	465	265	152	174	98	242	253	392	265	423	332	240	264	223	279
P0A6U8	Glycogen synthase OS=Escherichia coli (strain K12) GN=glgA PE=1 SV=1	glgA	7	424.8	52771.1	2	331	319	481	416	309	487	390	425	569	528	493	512	258	317	196	494	374	400	425	340	323	479
P08194	Glycerol-3-phosphate transporter OS=Escherichia coli (strain K12) GN=glpT PE=1 SV=1	glpT	7	277.09	50258.7	2	53	1045	741	51	92	72	413	84	71	82	71	69	51	51	72	51	51	77	68	52	63	54
P31677	Alpha,alpha-trehalose-phosphate synthase [UDP-forming] OS=Escherichia coli (strain K12) GN=otsA PE=1 SV=3	otsA	7	497.44	53559.8	2	199	233	169	250	268	248	204	152	246	257	295	340	193	197	324	320	272	103	240	188	128	188
P76014	PTS-dependent dihydroxyacetone kinase, ADP-binding subunit dhaL OS=Escherichia coli (strain K12) GN=dhaL PE=1 SV=3	dhaL	7	469.55	22599.3	2	95	130	294	51	50	120	221	45	81	79	79	68	27	28	71	56	53	70	71	53	33	57
P20966	PTS system fructose-specific EIIBC component OS=Escherichia coli (strain K12) GN=fruA PE=4 SV=1	fruA	7	378.08	57463.6	2	172	285	187	120	141	292	165	120	239	213	228	243	167	208	218	269	169	229	209	175	139	3364
P37188	Galactitol-specific phosphotransferase enzyme IIB component OS=Escherichia coli (strain K12) GN=gatB PE=1 SV=2	gatB	7	714.49	10197.3	2	6458	30177	29762	38600	24238	20351	17619	13512	41860	66083	45864	34568	2092	1168	5257	3555	4333	10396	14873	19451	25668	12116
P69828	Galactitol-specific phosphotransferase enzyme IIA component OS=Escherichia coli (strain K12) GN=gatA PE=4 SV=1	gatA	7	533.21	16878.8	2	5671	21707	18110	22656	15486	12886	13472	12264	17605	19462	13134	10628	532	326	3033	1546	3733	6293	10253	6862	13360	7969
P37676	2,3-diketo-L-gulonate-binding periplasmic protein yiaO OS=Escherichia coli (strain K12) GN=yiaO PE=1 SV=1	yiaO	7	291.93	35929.6	1	10	9	NA	4	7	4	6	26	2	31	32	23	4	20	1	5	1	NA	NA	2	9	NA
P0A6I0	Cytidylate kinase OS=Escherichia coli (strain K12) GN=cmk PE=1 SV=1	cmk	7	458.48	24713.1	2	950	1808	885	535	613	649	722	661	562	464	450	476	655	557	1164	1013	899	782	652	657	654	723
P0A9M5	Xanthine phosphoribosyltransferase OS=Escherichia coli (strain K12) GN=gpt PE=1 SV=1	gpt	7	626.95	16941.8	2	3383	5762	7396	2532	3233	2840	3562	3386	3165	2710	1815	1463	1739	1785	5029	3325	3608	3910	2339	1680	2981	2974
P09029	N5-carboxyaminoimidazole ribonucleotide synthase OS=Escherichia coli (strain K12) GN=purK PE=1 SV=2	purK	7	416.66	39418.3	2	227	185	207	91	139	164	165	212	137	79	60	47	76	81	276	340	274	287	256	127	226	318
P39377	Isoaspartyl dipeptidase OS=Escherichia coli (strain K12) GN=iadA PE=1 SV=1	iadA	7	439.67	41040.2	2	223	511	425	116	125	136	119	102	111	93	60	46	112	131	236	206	209	190	107	60	146	145
P41409	Pyrimidine-specific ribonucleoside hydrolase rihA OS=Escherichia coli (strain K12) GN=rihA PE=1 SV=2	rihA	7	330.28	33783.4	2	143	1192	583	217	307	290	268	224	328	228	162	146	50	50	97	86	80	125	274	144	309	240
P22564	Non-specific ribonucleoside hydrolase rihC OS=Escherichia coli (strain K12) GN=rihC PE=1 SV=1	rihC	7	415.34	32521.7	2	42	1217	735	211	366	154	212	255	292	382	328	283	47	49	63	52	28	62	315	137	258	86
P07639	3-dehydroquinate synthase OS=Escherichia coli (strain K12) GN=aroB PE=3 SV=1	aroB	7	515.44	38838.3	2	305	248	271	212	221	238	250	271	210	226	215	173	68	49	328	403	332	276	258	244	247	260
P00887	Phospho-2-dehydro-3-deoxyheptonate aldolase, Trp-sensitive OS=Escherichia coli (strain K12) GN=aroH PE=3 SV=4	aroH	7	496.42	38692.6	2	300	175	115	100	141	167	166	136	171	118	69	66	129	119	311	339	373	221	143	149	187	254
P0AED7	Succinyl-diaminopimelate desuccinylase OS=Escherichia coli (strain K12) GN=dapE PE=1 SV=1	dapE	7	417.64	41224.8	2	74	154	95	51	47	59	60	54	80	69	51	39	25	32	93	47	130	85	45	40	69	95
P60664	Imidazole glycerol phosphate synthase subunit hisF OS=Escherichia coli (strain K12) GN=hisF PE=1 SV=1	hisF	7	497.13	28418.6	2	1029	180	1418	279	455	594	838	598	456	372	398	259	283	284	702	1136	841	659	658	555	556	754
P00861	Diaminopimelate decarboxylase OS=Escherichia coli (strain K12) GN=lysA PE=1 SV=1	lysA	7	596.13	46130.4	2	726	169	146	369	622	513	712	545	736	516	326	194	144	146	693	681	851	770	492	377	724	960
P40874	N-methyl-L-tryptophan oxidase OS=Escherichia coli (strain K12) GN=solA PE=1 SV=1	solA	7	595.52	40858.3	2	813	502	528	342	453	460	534	533	407	364	302	266	200	193	763	682	683	511	495	361	483	555
P09158	Spermidine synthase OS=Escherichia coli (strain K12) GN=speE PE=1 SV=2	speE	7	450.06	32282.7	2	1040	1133	779	314	661	593	540	421	555	373	307	263	154	170	796	549	513	469	486	457	490	572
P0A6L4	N-acetylneuraminate lyase OS=Escherichia coli (strain K12) GN=nanA PE=1 SV=2	nanA	7	558.91	32554.8	2	81	5950	810	93	168	156	174	123	131	144	94	60	2	7	24	45	13	70	196	40	151	83
P22731	High-affinity branched-chain amino acid transport ATP-binding protein LivF OS=Escherichia coli (strain K12) GN=livF PE=1 SV=2	livF	7	273.98	26275.6	2	220	67	81	103	303	231	281	260	207	192	187	144	103	82	306	224	168	197	157	225	223	199
P69874	Spermidine/putrescine import ATP-binding protein PotA OS=Escherichia coli (strain K12) GN=potA PE=1 SV=1	potA	7	515.95	42983	2	249	530	431	135	188	206	184	114	243	205	136	146	146	120	207	219	222	276	192	132	202	236
Q5H777	Gamma-glutamylputrescine synthetase OS=Escherichia coli (strain K12) GN=puuA PE=3 SV=1	puuA	7	318.56	53125.2	2	122	95	151	283	145	240	84	61	306	521	505	416	32	40	79	71	40	63	147	253	98	95
P33360	Putative osmoprotectant uptake system ATP-binding protein YehX OS=Escherichia coli (strain K12) GN=yehX PE=2 SV=1	yehX	7	343.73	34384.9	1	118	71	NA	28	116	95	167	122	116	238	42	158	8	180	74	81	153	NA	NA	92	110	NA
P0ADQ2	Uncharacterized protein yiiD OS=Escherichia coli (strain K12) GN=yiiD PE=4 SV=1	yiiD	7	400.26	37052.7	2	134	200	132	156	178	162	151	164	178	278	190	206	131	114	124	307	229	148	168	175	167	158
P0A9R7	Cell division ATP-binding protein FtsE OS=Escherichia coli (strain K12) GN=ftsE PE=1 SV=1	ftsE	7	311.74	24405.9	2	250	330	325	144	206	247	266	288	233	209	171	193	174	216	309	419	285	321	313	276	309	377
P46889	DNA translocase ftsK OS=Escherichia coli (strain K12) GN=ftsK PE=1 SV=2	ftsK	7	327.87	146554	2	33	66	37	13	19	30	25	19	31	20	18	16	3	5	14	52	18	26	29	10	23	30
P0A734	Cell division topological specificity factor OS=Escherichia coli (strain K12) GN=minE PE=1 SV=1	minE	7	366.77	10210.5	2	2057	4004	3044	2049	2533	2817	2871	2914	2587	2619	2042	1983	576	576	3370	3192	2432	3040	3111	2309	3041	2998
P60293	Chromosome partition protein mukF OS=Escherichia coli (strain K12) GN=mukF PE=1 SV=1	mukF	7	462.33	50529.6	2	54	122	93	35	50	46	54	45	54	50	46	42	10	7	33	41	21	45	41	28	37	35
P20605	Probable adenosine monophosphate-protein transferase fic OS=Escherichia coli (strain K12) GN=fic PE=1 SV=1	fic	7	519.45	22927.4	1	283	142	NA	190	145	241	168	131	146	184	238	282	216	406	187	141	199	NA	NA	195	82	NA
P61949	Flavodoxin-1 OS=Escherichia coli (strain K12) GN=fldA PE=1 SV=2	fldA	7	563.06	19706.5	2	8651	12231	12152	5555	6504	9717	7989	6927	5684	4582	4047	4503	8193	8168	13420	13509	14311	8840	8072	7137	7806	9543
P09148	Galactose-1-phosphate uridylyltransferase OS=Escherichia coli (strain K12) GN=galT PE=1 SV=2	galT	7	318.35	39602.5	2	151	482	340	102	120	150	147	172	109	115	91	77	56	70	132	168	115	136	138	791	116	110
P0A9S1	Lactaldehyde reductase OS=Escherichia coli (strain K12) GN=fucO PE=1 SV=1	fucO	7	322.14	40600.7	2	41	234	67	211	127	118	83	102	91	154	195	247	54	54	24	41	41	53	135	189	133	50
P0ACD8	Hydrogenase-1 large chain OS=Escherichia coli (strain K12) GN=hyaB PE=1 SV=1	hyaB	7	322.87	66193	2	1	3	1	1	1	2	1	1	1	1	1	1	1	1	1	3	1	1	1	1	1	1
P23883	Gamma-glutamyl-gamma-aminobutyraldehyde dehydrogenase OS=Escherichia coli (strain K12) GN=puuC PE=3 SV=2	puuC	7	591.95	53367.4	2	116	43	61	28	51	169	72	58	391	570	229	43	5	10	67	24	23	95	369	27	70	166
P52643	D-lactate dehydrogenase OS=Escherichia coli (strain K12) GN=ldhA PE=1 SV=1	ldhA	7	335.98	36493.4	2	566	619	421	365	381	480	519	546	641	568	560	592	644	367	299	579	595	348	360	276	230	184
P76594	Uncharacterized protein yfiQ OS=Escherichia coli (strain K12) GN=yfiQ PE=4 SV=1	yfiQ	7	430.83	97908	2	17	19	13	24	42	33	24	44	49	71	98	125	9	16	17	16	13	16	43	44	32	20
P77212	Probable pyridine nucleotide-disulfide oxidoreductase ykgC OS=Escherichia coli (strain K12) GN=ykgC PE=3 SV=2	rclA	7	365.65	48195.9	2	18	30	33	21	20	78	18	14	23	36	51	55	126	117	79	25	155	27	24	56	26	21
P0A784	Oligoribonuclease OS=Escherichia coli (strain K12) GN=orn PE=1 SV=2	orn	7	363.22	20784.5	2	509	627	529	377	384	420	411	382	315	255	224	219	380	356	717	782	947	595	501	465	498	555
P07102	Periplasmic AppA protein OS=Escherichia coli (strain K12) GN=appA PE=1 SV=2	appA	7	353.53	47009.3	2	9	14	24	5	6	8	6	7	14	11	17	18	51	79	15	30	79	5	6	9	6	7
P0AD59	Inhibitor of vertebrate lysozyme OS=Escherichia coli (strain K12) GN=ivy PE=1 SV=1	ivy	7	425.22	16843.3	2	1704	1180	1344	1388	1467	1417	1074	1333	1370	1503	1397	1362	2355	2629	3481	3281	3066	2656	1161	1199	1046	930
P0ADX7	Uncharacterized protein yhhA OS=Escherichia coli (strain K12) GN=yhhA PE=4 SV=1	yhhA	7	621.92	16595.4	2	107	132	112	159	129	409	117	109	100	153	147	192	3178	2233	347	276	559	120	148	290	102	114
P0ADK0	Uncharacterized protein yiaF OS=Escherichia coli (strain K12) GN=yiaF PE=4 SV=2	yiaF	7	345.63	25629	2	1714	3055	2134	1093	1245	1261	1237	1178	1121	1005	818	850	1256	1169	1837	2139	1985	1455	1232	1011	1235	1387
P65556	Uncharacterized Nudix hydrolase yfcD OS=Escherichia coli (strain K12) GN=yfcD PE=1 SV=1	yfcD	7	495.39	20344.9	2	1419	2932	2904	1060	1264	1195	1203	1165	1801	1413	1046	878	274	457	1577	1141	842	1163	706	869	870	1015
P62517	Glucans biosynthesis glucosyltransferase H OS=Escherichia coli (strain K12) GN=mdoH PE=1 SV=1	mdoH	7	470.7	96856.9	2	84	102	120	43	50	61	43	77	125	100	93	91	45	46	35	75	82	74	70	40	82	73
P27828	UDP-N-acetylglucosamine 2-epimerase OS=Escherichia coli (strain K12) GN=wecB PE=1 SV=2	wecB	7	336.34	42199.9	2	116	206	114	37	54	64	56	53	51	33	21	16	59	41	107	107	92	71	49	29	52	68
P40120	Glucans biosynthesis protein D OS=Escherichia coli (strain K12) GN=mdoD PE=1 SV=3	mdoD	7	294.91	62699.6	2	93	100	109	56	84	68	94	86	48	48	43	37	23	16	21	51	30	54	68	38	66	72
P0AF12	5'-methylthioadenosine/S-adenosylhomocysteine nucleosidase OS=Escherichia coli (strain K12) GN=mtnN PE=1 SV=1	mtnN	7	603.08	24320.6	2	2180	3544	3433	1354	1784	2062	1996	1969	2290	1702	1383	1137	2097	2097	4841	2317	3940	2804	1863	2159	2065	2506
P75957	Lipoprotein-releasing system ATP-binding protein LolD OS=Escherichia coli (strain K12) GN=lolD PE=1 SV=2	lolD	6	342.71	25404.2	2	500	731	543	292	336	420	406	418	336	259	224	164	249	234	414	397	466	440	400	243	371	513
P08956	Type I restriction enzyme EcoKI R protein OS=Escherichia coli (strain K12) GN=hsdR PE=3 SV=3	hsdR	6	232.09	133994	2	4	36	16	5	10	6	7	5	7	5	3	5	4	1	2	2	1	6	9	7	12	6
P36879	Uncharacterized ABC transporter ATP-binding protein YadG OS=Escherichia coli (strain K12) GN=yadG PE=1 SV=1	yadG	6	268.55	34607.3	2	272	593	331	135	133	125	252	119	275	211	181	186	80	66	91	152	146	198	215	131	272	191
P60752	Lipid A export ATP-binding/permease protein MsbA OS=Escherichia coli (strain K12) GN=msbA PE=1 SV=1	msbA	6	332.77	64401.6	2	152	428	203	82	91	158	117	117	152	152	137	127	56	53	89	67	82	140	129	68	100	171
P69428	Sec-independent protein translocase protein tatA OS=Escherichia coli (strain K12) GN=tatA PE=1 SV=1	tatA	6	388.32	9640.02	2	2477	4227	3284	973	1654	2050	1799	1794	1587	1336	1219	1164	1320	1223	2384	2659	2367	1793	1666	1386	1441	1955
P0ABU7	Biopolymer transport protein exbB OS=Escherichia coli (strain K12) GN=exbB PE=1 SV=1	exbB	6	491.45	26252.8	2	819	561	1137	456	642	698	697	735	814	474	329	226	242	236	1399	1565	1200	1370	637	371	862	1347
P00803	Signal peptidase I OS=Escherichia coli (strain K12) GN=lepB PE=1 SV=2	lepB	6	267.05	35919.5	2	147	257	199	82	121	140	136	131	135	114	99	102	78	61	102	169	123	147	129	100	109	148
P0AG93	Protein-export membrane protein secF OS=Escherichia coli (strain K12) GN=secF PE=1 SV=1	secF	6	389.24	35341.6	2	465	1250	963	928	635	790	544	495	792	719	574	576	265	183	233	407	327	353	473	271	478	560
P37177	Phosphoenolpyruvate-protein phosphotransferase ptsP OS=Escherichia coli (strain K12) GN=ptsP PE=3 SV=2	ptsP	6	546.71	83644.7	2	42	55	42	37	36	57	42	38	72	73	66	54	17	24	26	50	50	75	68	31	54	68
P39838	Sensor-like histidine kinase RcsD OS=Escherichia coli (strain K12) GN=rcsD PE=1 SV=3	rcsD	6	281.77	100292	2	33	34	41	32	39	47	36	39	56	46	41	36	35	38	46	91	64	54	38	40	36	53
P39396	Inner membrane protein YjiY OS=Escherichia coli (strain K12) GN=yjiY PE=1 SV=2	yjiY	6	332.22	77255.2	2	14	459	27	5	5	7	14	1035	8	6	7	6	39	40	35	7	130	11	15	10	11	19
P21866	KDP operon transcriptional regulatory protein kdpE OS=Escherichia coli (strain K12) GN=kdpE PE=1 SV=3	kdpE	6	224.33	25328.5	1	59	60	NA	35	15	70	26	21	24	53	19	27	13	16	75	43	82	NA	NA	32	25	NA
P77213	Carboxylate-amine ligase YbdK OS=Escherichia coli (strain K12) GN=ybdK PE=1 SV=1	ybdK	6	291.51	41643.7	2	53	44	45	85	72	78	83	47	55	61	73	69	80	79	83	71	116	75	116	119	73	96
P75838	UPF0142 protein ycaO OS=Escherichia coli (strain K12) GN=ycaO PE=3 SV=2	ycaO	6	413.2	65592.1	2	437	1063	637	91	142	167	182	119	160	129	82	74	31	29	158	120	131	185	153	74	196	257
P0AB43	UPF0745 protein YcgL OS=Escherichia coli (strain K12) GN=ycgL PE=1 SV=2	ycgL	6	162.28	11221.8	2	127	127	135	68	83	84	104	101	81	64	47	38	58	66	119	201	148	103	85	95	72	127
P21362	Protein yciF OS=Escherichia coli (strain K12) GN=yciF PE=1 SV=1	yciF	6	525.1	18567.7	2	270	112	132	690	410	478	358	214	400	467	849	1053	885	809	604	562	513	167	410	955	241	166
P31130	Uncharacterized protein ydeI OS=Escherichia coli (strain K12) GN=ydeI PE=4 SV=1	ydeI	6	332.16	14094.2	2	110	137	75	97	81	157	76	56	77	98	151	220	460	424	232	63	244	42	64	162	28	40
P77148	Uncharacterized protein ydhS OS=Escherichia coli (strain K12) GN=ydhS PE=1 SV=1	ydhS	6	277.84	60698.9	2	42	32	35	80	66	54	52	32	79	85	109	93	39	36	53	31	72	29	34	51	29	21
P64483	Uncharacterized protein yeaK OS=Escherichia coli (strain K12) GN=yeaK PE=4 SV=1	yeaK	6	293.43	17821.4	2	438	562	479	406	382	301	387	388	595	459	372	305	45	30	957	476	550	554	289	338	279	422
P33218	Inner membrane protein yebE OS=Escherichia coli (strain K12) GN=yebE PE=1 SV=2	yebE	6	394.67	23654.4	2	480	118	169	353	534	364	922	1644	123	150	135	155	56	92	149	581	68	411	772	376	350	852
P76402	UPF0339 protein yegP OS=Escherichia coli (strain K12) GN=yegP PE=1 SV=2	yegP	6	441.09	11999	2	386	165	111	349	433	542	367	269	355	418	486	629	1412	1223	727	562	1000	307	457	874	317	288
P0ADS6	Uncharacterized protein yggE OS=Escherichia coli (strain K12) GN=yggE PE=4 SV=1	yggE	6	338.99	26600.8	2	948	1276	1067	674	832	789	863	692	954	816	600	700	1083	1282	1204	1778	1460	992	962	944	932	862
P0ADU5	Protein ygiW OS=Escherichia coli (strain K12) GN=ygiW PE=1 SV=1	ygiW	6	320.89	13984	2	1669	2167	3146	1709	2213	2688	2844	1595	1721	1849	2182	2335	8382	7045	5031	2775	6642	1668	2195	2210	1688	1618
P0ADP9	Protein yihD OS=Escherichia coli (strain K12) GN=yihD PE=1 SV=1	yihD	6	279.39	10248.4	2	2511	3565	2134	1597	1546	2012	1514	1687	1684	1849	1768	1522	497	368	1999	2964	2326	1817	1445	893	1246	1375
P77214	Cation efflux system protein CusF OS=Escherichia coli (strain K12) GN=cusF PE=1 SV=1	cusF	6	324.99	12225.3	2	29517	1548	1473	21140	28965	5118	39220	19299	12582	11219	5782	4886	1440	1296	4740	17581	19261	10240	31343	15480	28457	34791
Q46920	NADPH-dependent 7-cyano-7-deazaguanine reductase OS=Escherichia coli (strain K12) GN=queF PE=1 SV=1	queF	6	239.39	32549.3	2	59	92	100	28	53	58	64	51	56	37	36	28	29	39	55	59	74	46	37	31	49	71
P64530	Transcriptional repressor rcnR OS=Escherichia coli (strain K12) GN=rcnR PE=1 SV=1	rcnR	6	280.74	10109.5	2	494	127	332	336	401	395	393	435	259	262	257	241	336	420	558	482	476	337	290	282	291	224
P0A8A8	Ribosome maturation factor rimP OS=Escherichia coli (strain K12) GN=rimP PE=1 SV=2	rimP	6	212.86	16622.5	2	609	1246	1014	381	435	669	507	356	403	309	281	224	374	323	943	876	639	578	308	280	355	514
P0A8X0	UPF0307 protein yjgA OS=Escherichia coli (strain K12) GN=yjgA PE=1 SV=1	yjgA	6	280.59	21328.3	2	166	435	280	157	159	184	150	111	129	116	108	115	209	219	197	221	308	157	167	131	119	136
Q46868	Uncharacterized protein yqiC OS=Escherichia coli (strain K12) GN=yqiC PE=1 SV=2	yqiC	6	243.5	11251.1	2	1520	1617	1537	890	1197	1275	1314	1019	1008	747	716	664	464	327	1650	1943	1691	1385	1046	911	1074	1265
P0AF36	Cell division protein ZapB OS=Escherichia coli (strain K12) GN=zapB PE=1 SV=1	zapB	6	612.05	9610.8	2	10839	17591	13745	8451	6621	7419	8727	7765	8404	6656	4934	4293	2641	2333	10477	10488	7872	8457	6681	4126	4364	8105
P66948	TPR repeat-containing protein yfgC OS=Escherichia coli (strain K12) GN=yfgC PE=4 SV=1	bepA	6	382.33	53856.3	2	177	140	140	171	170	176	187	210	104	120	151	144	147	80	235	303	385	238	229	279	231	224
P23827	Ecotin OS=Escherichia coli (strain K12) GN=eco PE=1 SV=1	eco	6	427.58	18162.4	2	214	3877	1636	200	145	175	136	134	219	466	400	293	315	241	427	153	186	235	143	79	200	117
P0AFZ3	Stringent starvation protein B OS=Escherichia coli (strain K12) GN=sspB PE=1 SV=1	sspB	6	331.45	18233.1	2	353	713	546	204	285	279	277	303	201	159	132	100	87	105	379	290	399	349	230	152	233	219
P75736	Esterase ybfF OS=Escherichia coli (strain K12) GN=ybfF PE=1 SV=1	ybfF	6	402.54	28401.5	2	204	165	225	180	203	214	206	240	173	156	122	87	97	70	191	199	183	156	167	124	207	172
P21829	Phosphatase YbhA OS=Escherichia coli (strain K12) GN=ybhA PE=3 SV=3	ybhA	6	259.54	30164.1	2	352	593	639	145	212	181	253	219	185	83	35	14	6	1	271	258	220	304	219	79	305	331
P67095	Phosphodiesterase yfcE OS=Escherichia coli (strain K12) GN=yfcE PE=1 SV=1	yfcE	6	448.86	20091.4	2	907	1310	881	471	538	784	584	610	697	520	475	439	619	725	1326	1792	1495	901	548	600	587	672
P77775	Epimerase family protein yfcH OS=Escherichia coli (strain K12) GN=yfcH PE=3 SV=1	yfcH	6	391.11	32660.2	2	95	90	87	146	132	154	112	129	111	146	201	241	193	171	91	161	139	91	138	222	110	101
P67080	UPF0001 protein yggS OS=Escherichia coli (strain K12) GN=yggS PE=1 SV=1	yggS	6	277.52	25753.3	2	208	297	224	127	164	168	192	176	142	136	94	83	67	76	240	184	181	187	146	110	136	151
P46852	Probable quercetin 2,3-dioxygenase yhhW OS=Escherichia coli (strain K12) GN=yhhW PE=1 SV=1	yhhW	6	265.14	26244.9	2	81	80	116	80	122	90	121	75	66	75	85	113	114	129	157	132	140	114	105	180	103	109
P37648	Protein yhjJ OS=Escherichia coli (strain K12) GN=yhjJ PE=1 SV=1	yhjJ	6	433.06	55474.6	2	116	193	87	65	74	78	82	142	52	56	66	87	101	62	102	209	169	76	72	108	46	79
P42641	GTPase ObgE/CgtA OS=Escherichia coli (strain K12) GN=obgE PE=1 SV=1	obgE	6	517.35	43240.7	2	418	1038	753	291	319	276	310	307	334	318	261	303	100	117	166	194	155	297	325	298	325	354
Q5H776	Gamma-glutamyl-gamma-aminobutyrate hydrolase OS=Escherichia coli (strain K12) GN=puuD PE=4 SV=1	puuD	6	270.75	27977.4	2	114	30	64	43	63	156	35	34	214	418	245	91	10	6	78	16	10	29	117	20	36	47
P75876	Ribosomal RNA large subunit methyltransferase I OS=Escherichia coli (strain K12) GN=rlmI PE=1 SV=2	rlmI	6	359.56	44310.8	2	172	429	412	92	120	146	154	140	168	122	101	95	78	156	217	204	386	297	181	127	167	349
Q46948	Chaperone protein YajL OS=Escherichia coli (strain K12) GN=yajL PE=1 SV=2	yajL	6	365.57	20745.9	2	370	444	388	322	293	393	376	361	363	314	267	227	338	283	1030	482	775	533	319	327	362	491
P64429	Uncharacterized protein ypfJ OS=Escherichia coli (strain K12) GN=ypfJ PE=4 SV=1	ypfJ	6	345.36	31422.3	2	126	99	99	97	104	169	136	101	125	109	111	105	86	224	221	151	159	145	72	140	96	80
P64596	Uncharacterized protein yraP OS=Escherichia coli (strain K12) GN=yraP PE=4 SV=1	yraP	6	337.51	19997.7	2	754	1312	891	487	709	817	793	819	688	575	499	453	985	741	1231	1026	1114	739	633	637	553	630
P42624	Pirin-like protein yhaK OS=Escherichia coli (strain K12) GN=yhaK PE=1 SV=1	yhaK	6	280.01	25861.2	1	33	8	NA	19	60	16	18	19	18	23	11	15	68	45	21	32	13	NA	NA	9	30	NA
P27848	Uncharacterized protein YigL OS=Escherichia coli (strain K12) GN=yigL PE=3 SV=4	yigL	6	275.86	29670.8	2	854	1177	753	502	549	715	617	570	646	482	436	393	122	231	529	543	657	564	747	450	628	689
P75931	Virulence factor mviM homolog OS=Escherichia coli (strain K12) GN=mviM PE=1 SV=1	yceM	6	215.97	33642.2	2	39	23	21	39	51	48	50	59	48	65	62	66	28	17	9	13	40	33	27	31	28	25
P0A6J1	Adenylyl-sulfate kinase OS=Escherichia coli (strain K12) GN=cysC PE=1 SV=2	cysC	6	530.73	22289.5	2	834	206	502	472	495	485	543	475	447	288	160	126	151	127	470	720	825	529	394	273	450	601
P0AFJ7	Low-affinity inorganic phosphate transporter 1 OS=Escherichia coli (strain K12) GN=pitA PE=1 SV=1	pitA	6	348.83	53336.4	2	208	288	267	92	156	168	152	252	184	143	123	107	106	134	97	235	177	195	219	124	188	241
P0AGD3	Superoxide dismutase [Fe] OS=Escherichia coli (strain K12) GN=sodB PE=1 SV=2	sodB	6	481.83	21234.5	2	4213	22543	5752	4287	4801	7067	4590	4198	4594	5703	4462	3389	1412	1220	2538	6806	4210	3225	4759	2783	5850	4440
P0AGD1	Superoxide dismutase [Cu-Zn] OS=Escherichia coli (strain K12) GN=sodC PE=1 SV=1	sodC	6	307.02	17652	2	346	280	267	268	308	530	298	244	212	203	369	462	1627	1373	812	262	716	241	291	719	194	237
P0A9L3	FKBP-type 22 kDa peptidyl-prolyl cis-trans isomerase OS=Escherichia coli (strain K12) GN=fklB PE=1 SV=2	fklB	6	443.87	22184.5	2	4381	7989	8368	1797	3166	3429	3350	3593	2728	2104	1557	1080	1697	1628	5052	2790	4055	3380	2992	1848	3216	3581
P0A9N4	Pyruvate formate-lyase 1-activating enzyme OS=Escherichia coli (strain K12) GN=pflA PE=1 SV=2	pflA	6	264.78	28168	2	189	309	259	132	160	157	154	137	144	133	135	140	79	57	101	207	199	122	122	127	112	124
P63284	Chaperone protein ClpB OS=Escherichia coli (strain K12) GN=clpB PE=1 SV=1	clpB	6	3517.57	95507.9	2	119	423	156	136	155	177	132	114	127	120	130	129	612	547	171	525	375	118	118	72	104	118
P77544	Uncharacterized GST-like protein yfcF OS=Escherichia coli (strain K12) GN=yfcF PE=1 SV=1	yfcF	6	279.73	24292.5	2	191	74	79	84	109	113	115	72	92	90	80	73	71	82	199	120	263	140	106	109	89	103
P0ACA1	Uncharacterized GST-like protein yibF OS=Escherichia coli (strain K12) GN=yibF PE=1 SV=1	yibF	6	370.5	22512.8	2	637	351	549	421	577	552	626	633	409	335	368	362	345	256	737	196	676	575	594	614	552	604
P0AA25	Thioredoxin-1 OS=Escherichia coli (strain K12) GN=trxA PE=1 SV=2	trxA	6	363.89	11781.1	2	20951	26242	25428	11139	14560	20034	18242	17400	14939	12758	11467	10279	16304	15355	24508	24498	27898	21449	19876	20591	17823	25227
P0AAN3	Hydrogenase isoenzymes nickel incorporation protein hypB OS=Escherichia coli (strain K12) GN=hypB PE=1 SV=1	hypB	6	317.45	31526.8	2	24	64	25	23	26	18	15	17	21	17	19	24	4	15	23	20	35	26	39	21	25	26
P08395	Protease 4 OS=Escherichia coli (strain K12) GN=sppA PE=1 SV=2	sppA	6	323.23	67159.2	2	53	86	65	39	49	55	51	69	79	77	69	59	40	21	65	65	69	76	55	35	44	95
P07017	Methyl-accepting chemotaxis protein II OS=Escherichia coli (strain K12) GN=tar PE=1 SV=2	tar	6	396.73	59888.6	2	2	4	3	1	2	13	5	4	30	87	24	2	3	36	4	2	4	5	2	10	2	7
P0A9H7	Cyclopropane-fatty-acyl-phospholipid synthase OS=Escherichia coli (strain K12) GN=cfa PE=1 SV=2	cfa	6	262.42	43862.7	2	71	96	67	40	22	47	25	25	41	33	26	21	22	4	75	50	135	57	30	25	25	32
P29012	Alanine racemase, catabolic OS=Escherichia coli (strain K12) GN=dadX PE=2 SV=2	dadX	6	442.4	38801.9	2	28	411	406	142	70	54	50	144	60	77	50	71	46	52	59	20	52	53	46	18	48	36
P37760	dTDP-4-dehydrorhamnose reductase OS=Escherichia coli (strain K12) GN=rfbD PE=3 SV=2	rfbD	6	359.82	32655.7	2	761	1757	1375	507	622	534	575	476	537	448	315	234	159	122	679	751	670	682	545	324	683	699
P37194	Outer membrane protein slp OS=Escherichia coli (strain K12) GN=slp PE=1 SV=1	slp	6	365.71	20932.7	2	552	421	499	2360	714	1018	466	303	700	792	623	611	7580	7946	2147	1551	12769	1153	652	595	748	583
P37645	Uncharacterized protein yhjG OS=Escherichia coli (strain K12) GN=yhjG PE=4 SV=3	yhjG	6	259.98	74393.2	2	16	29	20	27	29	30	20	24	37	47	74	103	26	26	29	15	46	19	33	54	21	19
P37665	Inner membrane lipoprotein yiaD OS=Escherichia coli (strain K12) GN=yiaD PE=1 SV=2	yiaD	6	520.41	22165.5	2	344	2116	653	60	129	77	159	216	49	47	30	24	209	259	392	900	309	340	136	64	136	234
P39285	Uncharacterized mscS family protein yjeP OS=Escherichia coli (strain K12) GN=yjeP PE=3 SV=3	mscM	6	245.94	123872	2	14	23	14	16	20	28	15	25	14	14	13	17	6	7	13	18	15	12	12	17	10	13
P02929	Protein tonB OS=Escherichia coli (strain K12) GN=tonB PE=1 SV=2	tonB	6	260.37	26060	2	108	75	129	52	83	80	86	98	96	59	55	43	52	50	193	218	159	171	89	63	95	141
Q6BF17	D-galactonate dehydratase OS=Escherichia coli (strain K12) GN=dgoD PE=1 SV=1	dgoD	6	325.63	42477.8	2	9	13	7	4	5	7	6	3	5	8	15	10	4	3	3	7	7	8	15	675	12	12
P77552	Uncharacterized protein ydhQ OS=Escherichia coli (strain K12) GN=ydhQ PE=4 SV=1	ydhQ	6	274.07	42831.7	2	85	318	223	68	88	84	93	75	77	66	44	28	96	78	208	167	97	142	65	47	75	86
P0ADA5	Uncharacterized lipoprotein yajG OS=Escherichia coli (strain K12) GN=yajG PE=4 SV=1	yajG	6	410.42	20918.8	2	4572	6632	7749	2378	3603	3648	4049	4053	3884	3531	2444	1984	1380	1509	3022	2695	2206	3463	3582	2460	3702	3824
P77338	Potassium efflux system KefA OS=Escherichia coli (strain K12) GN=kefA PE=1 SV=1	mscK	6	272.29	127117	2	7	16	7	3	4	6	4	6	8	5	4	4	4	5	5	14	6	7	5	2	3	9
P0AFQ7	Uncharacterized deoxyribonuclease ycfH OS=Escherichia coli (strain K12) GN=ycfH PE=1 SV=1	ycfH	6	318.45	29772.1	2	43	85	70	33	25	30	28	27	36	23	17	16	43	50	95	69	68	52	28	17	25	37
P23909	DNA mismatch repair protein mutS OS=Escherichia coli (strain K12) GN=mutS PE=1 SV=1	mutS	6	368.27	95169.1	2	39	117	49	22	32	36	29	47	42	30	24	22	8	12	33	40	26	35	25	15	16	36
P0AFY8	Protein seqA OS=Escherichia coli (strain K12) GN=seqA PE=1 SV=1	seqA	6	309.14	20284.5	2	1357	2745	1706	809	951	1097	1019	991	907	772	697	655	1119	1095	1530	3080	1738	1308	1019	870	1004	1388
P0CE49	Transposase insH for insertion sequence element IS5A OS=Escherichia coli (strain K12) GN=insH1 PE=3 SV=1	insH	6	196.39	39284.1	1	56	122	NA	28	72	71	39	52	55	58	45	23	27	31	56	47	36	NA	NA	19	57	NA
P0A9H1	G/U mismatch-specific DNA glycosylase OS=Escherichia coli (strain K12) GN=mug PE=1 SV=1	mug	6	269.09	18643.8	2	241	306	224	134	198	180	207	170	190	172	123	101	300	180	357	494	280	178	145	198	171	171
P21893	Single-stranded-DNA-specific exonuclease recJ OS=Escherichia coli (strain K12) GN=recJ PE=1 SV=2	recJ	6	270.97	63330.9	1	5	31	NA	1	13	4	5	3	2	4	5	1	5	3	24	14	13	NA	NA	1	4	NA
P0A8W5	UPF0301 protein yqgE OS=Escherichia coli (strain K12) GN=yqgE PE=1 SV=1	yqgE	6	234.41	20654.8	2	410	441	375	186	258	292	299	264	191	162	137	112	82	84	307	248	305	249	245	177	264	395
P0A8U6	Met repressor OS=Escherichia coli (strain K12) GN=metJ PE=1 SV=2	metJ	6	340.61	12115.1	2	990	1222	643	689	774	770	651	640	641	609	566	552	624	598	1032	993	1418	778	510	547	594	668
P45425	N-acetylmannosamine kinase OS=Escherichia coli (strain K12) GN=nanK PE=1 SV=2	nanK	6	362.02	29607.5	2	7	561	78	9	15	9	12	16	17	16	13	19	3	4	7	5	4	5	19	7	12	24
P0A9F1	Transcriptional regulator mntR OS=Escherichia coli (strain K12) GN=mntR PE=1 SV=1	mntR	6	287.5	17611.2	2	148	223	188	91	127	130	110	128	116	96	83	66	121	76	164	106	187	152	125	68	119	133
P0A8D0	Transcriptional repressor NrdR OS=Escherichia coli (strain K12) GN=nrdR PE=1 SV=1	nrdR	6	248.73	17199.8	2	211	224	214	164	213	214	247	221	178	132	117	99	126	97	312	352	262	241	160	112	140	237
P77300	Uncharacterized HTH-type transcriptional regulator yagI OS=Escherichia coli (strain K12) GN=yagI PE=4 SV=1	yagI	6	253.49	27802.7	1	37	6	NA	13	12	23	31	11	8	25	1	2	6	1	12	26	23	NA	NA	18	18	NA
P0A7D1	Peptidyl-tRNA hydrolase OS=Escherichia coli (strain K12) GN=pth PE=1 SV=1	pth	6	310.76	21051.1	2	733	1188	1243	318	499	534	465	477	395	296	222	189	276	244	592	622	534	452	401	265	446	517
P0A7U3	30S ribosomal protein S19 OS=Escherichia coli (strain K12) GN=rpsS PE=1 SV=2	rpsS	6	532.76	10405.7	2	19008	51051	33384	7899	11758	11610	13707	10256	11619	7839	5153	4656	7532	6372	17918	18328	17060	16630	12778	7558	12140	20308
P68679	30S ribosomal protein S21 OS=Escherichia coli (strain K12) GN=rpsU PE=1 SV=2	rpsU	6	437.08	8476.72	2	28385	70780	47960	9984	16062	19399	20777	15417	17301	12279	9013	7760	9950	7654	25230	23941	26057	22332	15866	10753	16345	22684
P0A873	tRNA (guanine-N(1)-)-methyltransferase OS=Escherichia coli (strain K12) GN=trmD PE=1 SV=1	trmD	6	228.9	28386.4	2	121	236	128	66	80	79	94	73	70	52	57	38	32	49	66	85	38	37	54	33	50	45
P0AA37	Ribosomal large subunit pseudouridine synthase A OS=Escherichia coli (strain K12) GN=rluA PE=1 SV=2	rluA	6	322.31	24826.7	1	118	386	NA	63	99	76	111	56	73	127	122	63	11	70	120	146	130	NA	NA	67	82	NA
P0AFR4	Uncharacterized protein yciO OS=Escherichia coli (strain K12) GN=yciO PE=1 SV=1	yciO	6	367.16	23179	2	706	1088	827	723	744	899	813	711	784	649	729	794	1052	1190	1231	796	1234	864	788	974	648	774
P0A9J0	Ribonuclease G OS=Escherichia coli (strain K12) GN=rng PE=1 SV=2	rng	6	275.86	55311.5	2	85	98	75	58	53	70	79	63	90	70	56	33	19	13	55	62	66	56	67	46	58	86
P0ABD8	Biotin carboxyl carrier protein of acetyl-CoA carboxylase OS=Escherichia coli (strain K12) GN=accB PE=1 SV=1	accB	6	354.47	16658.4	2	2574	6082	4425	1380	1953	2023	2201	2022	1890	1472	1250	1096	2017	1864	3278	3766	2688	2308	2071	1658	2256	2381
Q46939	Probable acetyl-CoA acetyltransferase OS=Escherichia coli (strain K12) GN=yqeF PE=3 SV=2	yqeF	6	286.64	40975.1	2	19	113	105	46	100	58	47	47	40	52	35	23	10	12	17	11	8	17	66	80	93	41
P0ABQ2	2-hydroxy-3-oxopropionate reductase OS=Escherichia coli (strain K12) GN=garR PE=1 SV=1	garR	6	543.5	30389.8	2	27	770	59	25	44	34	34	23	29	36	29	46	8	7	22	36	17	23	30	22	30	21
P12995	Adenosylmethionine-8-amino-7-oxononanoate aminotransferase OS=Escherichia coli (strain K12) GN=bioA PE=1 SV=2	bioA	6	290.8	47286.5	2	139	33	200	125	88	109	91	83	112	71	50	41	117	135	311	177	139	144	93	87	106	99
P0AC13	Dihydropteroate synthase OS=Escherichia coli (strain K12) GN=folP PE=1 SV=1	folP	6	392.79	30577.7	2	223	429	360	147	173	191	167	152	182	116	76	54	91	74	256	214	221	204	133	103	189	176
P0ABU0	1,4-Dihydroxy-2-naphthoyl-CoA synthase OS=Escherichia coli (strain K12) GN=menB PE=1 SV=1	menB	6	309.96	31594.5	2	558	1263	679	489	535	558	531	465	519	470	405	429	232	378	545	761	829	614	516	509	575	470
P0A738	Molybdenum cofactor biosynthesis protein C OS=Escherichia coli (strain K12) GN=moaC PE=1 SV=2	moaC	6	452.92	17438	2	316	403	230	156	184	250	203	194	177	139	104	99	258	340	711	628	440	343	217	201	222	329
P0AFI7	Pyridoxine/pyridoxamine 5'-phosphate oxidase OS=Escherichia coli (strain K12) GN=pdxH PE=1 SV=2	pdxH	6	332.99	25511.2	2	302	232	282	238	292	264	301	302	293	246	197	164	180	271	417	443	450	464	297	229	323	347
P0AG40	Riboflavin biosynthesis protein ribF OS=Escherichia coli (strain K12) GN=ribF PE=1 SV=1	ribF	6	272.86	34694.5	2	160	214	174	100	131	146	154	141	180	114	127	88	72	81	106	178	151	149	113	114	116	170
P36553	Coproporphyrinogen-III oxidase, aerobic OS=Escherichia coli (strain K12) GN=hemF PE=1 SV=1	hemF	6	186.94	34282.8	1	116	44	NA	34	54	49	34	45	43	49	16	16	17	11	72	138	103	NA	NA	21	28	NA
P25539	Riboflavin biosynthesis protein RibD OS=Escherichia coli (strain K12) GN=ribD PE=1 SV=1	ribD	6	293.83	40294.8	2	194	129	124	106	151	178	176	179	134	86	72	62	94	92	189	178	242	162	128	115	165	139
P26612	Cytoplasmic alpha-amylase OS=Escherichia coli (strain K12) GN=amyA PE=3 SV=3	amyA	6	226.51	56585.4	2	109	78	110	113	144	122	183	99	111	109	96	86	132	142	251	83	224	168	185	166	156	162
P0A955	KHG/KDPG aldolase OS=Escherichia coli (strain K12) GN=eda PE=1 SV=1	eda	6	410.21	22251.9	2	3635	4879	3845	2352	2242	3003	2180	2549	2894	2391	1771	1251	2085	1788	4824	3948	5194	3394	2368	2037	2726	3579
P39366	Putative aminopeptidase sgcX OS=Escherichia coli (strain K12) GN=sgcX PE=3 SV=3	sgcX	6	338.01	40570.7	2	5	6	6	5	7	12	5	4	2	9	18	166	6	10	1	9	2	3	3	4	3	5
P77713	Putative beta-xylosidase OS=Escherichia coli (strain K12) GN=yagH PE=3 SV=1	yagH	6	323.2	60768.4	2	25	34	32	12	28	31	25	26	27	25	33	25	16	18	15	30	14	302	18	14	18	21
P0AEX3	Alpha-ketoglutarate permease OS=Escherichia coli (strain K12) GN=kgtP PE=1 SV=1	kgtP	6	323.34	47003.4	2	124	231	211	112	145	307	93	136	329	357	417	416	80	81	241	146	160	241	156	146	134	130
P39829	D-galactarate dehydratase OS=Escherichia coli (strain K12) GN=garD PE=1 SV=2	garD	6	330.74	56348.1	2	9	266	16	10	18	7	9	10	9	19	24	36	1	7	5	8	4	7	8	7	9	4
P0A9C9	Fructose-1,6-bisphosphatase 1 class 2 OS=Escherichia coli (strain K12) GN=glpX PE=1 SV=1	glpX	6	329.32	35811.6	2	187	341	399	67	119	137	266	100	89	70	59	56	48	75	144	151	128	131	118	107	129	156
P37647	2-dehydro-3-deoxygluconokinase OS=Escherichia coli (strain K12) GN=kdgK PE=3 SV=1	kdgK	6	437.31	33923	2	547	968	941	548	554	513	479	508	460	351	272	205	154	307	661	639	707	578	371	375	281	452
P76142	Autoinducer 2-binding protein lsrB OS=Escherichia coli (strain K12) GN=lsrB PE=1 SV=1	lsrB	6	223.06	36643.9	2	85	121	144	163	353	111	65	100	66	111	216	415	540	452	102	194	166	102	94	291	269	91
P25718	Alpha-amylase OS=Escherichia coli (strain K12) GN=malS PE=1 SV=1	malS	6	223.84	75646.9	1	23	3	NA	3	3	5	4	4	10	22	14	11	15	8	3	20	5	NA	NA	3	4	NA
P0AA04	Phosphocarrier protein HPr OS=Escherichia coli (strain K12) GN=ptsH PE=1 SV=1	ptsH	6	457.8	9095.73	2	24850	16746	19193	9533	11946	21858	13501	12590	20570	13546	9835	6327	9569	10741	21376	24930	26036	10488	17417	12378	15247	26658
P0C0L7	Proline/betaine transporter OS=Escherichia coli (strain K12) GN=proP PE=1 SV=1	proP	6	245	54792.1	2	268	410	126	54	75	128	92	46	130	85	74	64	344	330	642	418	597	298	129	104	114	226
P69829	Nitrogen regulatory protein OS=Escherichia coli (strain K12) GN=ptsN PE=1 SV=1	ptsN	6	542.95	17930.4	2	861	1917	1181	710	827	824	901	828	907	909	799	656	755	699	1113	789	1000	865	1258	2407	1339	886
P31806	Uncharacterized protein yjeF OS=Escherichia coli (strain K12) GN=yjeF PE=1 SV=2	nnr	6	274.92	54598.2	2	48	86	58	71	82	63	65	58	85	108	118	186	85	76	92	95	66	77	63	119	70	57
P60546	Guanylate kinase OS=Escherichia coli (strain K12) GN=gmk PE=1 SV=1	gmk	6	394.25	23560	2	437	799	795	194	279	269	293	232	270	203	160	136	331	366	519	515	537	432	274	279	277	368
P0A720	Thymidylate kinase OS=Escherichia coli (strain K12) GN=tmk PE=1 SV=1	tmk	6	364.76	23750.4	2	204	271	288	91	104	141	110	124	117	70	72	62	42	32	106	115	89	124	89	49	70	76
P0AFL6	Exopolyphosphatase OS=Escherichia coli (strain K12) GN=ppx PE=1 SV=2	ppx	6	339.72	58081.2	2	31	75	54	29	35	47	36	29	71	50	44	44	30	30	26	44	44	39	33	14	21	48
P52061	Nucleoside-triphosphatase rdgB OS=Escherichia coli (strain K12) GN=rdgB PE=1 SV=1	rdgB	6	251.05	21007.9	2	677	1064	851	321	407	472	471	456	387	292	256	204	129	143	424	307	307	376	481	275	444	467
P0A9D4	Serine acetyltransferase OS=Escherichia coli (strain K12) GN=cysE PE=1 SV=1	cysE	6	277.21	29280	2	400	494	620	394	447	602	530	482	477	411	350	351	180	197	275	616	543	533	518	414	482	582
P0A962	L-asparaginase 1 OS=Escherichia coli (strain K12) GN=ansA PE=1 SV=1	ansA	6	372.65	37085.8	2	554	630	556	280	343	398	313	273	368	351	298	246	186	172	358	453	462	394	370	252	312	451
P75682	Uncharacterized protein yagE OS=Escherichia coli (strain K12) GN=yagE PE=1 SV=1	yagE	6	340.83	33277.4	2	42	737	923	97	126	77	132	80	136	155	112	62	40	9	23	25	20	53	212	107	93	81
P0A959	Uncharacterized aminotransferase YfbQ OS=Escherichia coli (strain K12) GN=yfbQ PE=1 SV=1	alaA	6	395.68	45470.4	2	100	105	207	60	99	99	110	70	79	112	103	85	20	9	43	81	62	54	63	59	75	63
P77434	Uncharacterized aminotransferase YfdZ OS=Escherichia coli (strain K12) GN=yfdZ PE=2 SV=1	alaC	6	292.7	46168.7	2	93	116	94	95	75	80	77	68	100	107	84	80	56	49	124	81	77	104	99	77	79	71
P77581	Succinylornithine transaminase OS=Escherichia coli (strain K12) GN=astC PE=1 SV=1	astC	6	354.5	43620	2	44	224	309	79	183	141	57	65	93	238	281	251	83	77	90	89	112	57	131	137	134	52
P10346	Glutamine transport ATP-binding protein GlnQ OS=Escherichia coli (strain K12) GN=glnQ PE=1 SV=1	glnQ	6	359.67	26696.1	2	698	803	1067	742	1081	951	1003	1107	1049	1169	951	847	242	328	628	1357	645	966	1066	828	1118	861
P37595	Isoaspartyl peptidase OS=Escherichia coli (strain K12) GN=iaaA PE=1 SV=2	iaaA	6	301.03	33354.6	2	67	48	90	80	70	57	65	75	67	58	44	50	73	87	147	145	189	81	44	58	65	67
P77348	Periplasmic murein peptide-binding protein OS=Escherichia coli (strain K12) GN=mppA PE=1 SV=2	mppA	6	318.36	59844.9	2	67	252	146	72	131	98	95	94	95	115	117	101	50	61	60	50	71	68	100	85	105	77
P14175	Glycine betaine/L-proline transport ATP-binding protein ProV OS=Escherichia coli (strain K12) GN=proV PE=1 SV=1	proV	6	426	44117.1	2	29	1187	26	2	4	8	5	6	3	2	2	2	9	6	42	14	5	14	3	4	4	3
P77795	Uncharacterized ABC transporter ATP-binding protein YdcT OS=Escherichia coli (strain K12) GN=ydcT PE=3 SV=1	ydcT	6	223.04	36999.1	2	24	38	32	22	61	34	41	27	37	67	83	123	23	14	11	27	15	18	35	41	38	20
P37690	Uncharacterized protein yibP OS=Escherichia coli (strain K12) GN=yibP PE=4 SV=2	envC	6	297.87	46548.4	2	57	60	57	35	39	46	41	45	55	49	49	55	31	27	34	53	36	50	62	100	71	53
P0AAJ5	Formate dehydrogenase-O iron-sulfur subunit OS=Escherichia coli (strain K12) GN=fdoH PE=1 SV=1	fdoH	6	280.88	33060.9	2	4	800	3	16	7	2	4	2	2	4	3	5	3	1	1	3	1	2	4	5	4	1
P0A6S7	Glycerol-3-phosphate dehydrogenase [NAD(P)+] OS=Escherichia coli (strain K12) GN=gpsA PE=3 SV=1	gpsA	6	334.41	36320.6	2	327	949	518	307	349	306	301	323	327	303	274	276	277	204	337	262	391	270	277	179	255	217
P0AFD6	NADH-quinone oxidoreductase subunit I OS=Escherichia coli (strain K12) GN=nuoI PE=1 SV=1	nuoI	6	261.7	20506.1	2	294	1140	801	244	443	525	471	356	357	387	366	299	102	107	138	252	283	227	343	249	358	301
P77258	N-ethylmaleimide reductase OS=Escherichia coli (strain K12) GN=nemA PE=1 SV=1	nemA	6	360.43	39474.1	2	99	196	120	55	71	76	87	56	61	40	26	18	9	5	104	26	76	88	38	21	54	60
P23886	ATP-binding/permease protein CydC OS=Escherichia coli (strain K12) GN=cydC PE=3 SV=2	cydC	6	350.4	62862.7	2	77	159	109	52	74	103	103	103	136	114	99	103	36	77	68	137	54	70	70	47	62	110
P29018	ATP-binding/permease protein CydD OS=Escherichia coli (strain K12) GN=cydD PE=1 SV=3	cydD	6	359.35	64997.3	2	60	91	48	33	32	49	52	71	83	66	45	46	16	30	51	48	26	39	44	19	38	79
P24251	Sigma factor-binding protein crl OS=Escherichia coli (strain K12) GN=crl PE=1 SV=5	crl	6	305.92	15627	2	1960	3202	3471	625	1274	1497	1316	1289	1412	1091	772	521	263	221	2551	1676	1474	1894	1439	952	1345	1547
P03841	Maltose operon periplasmic protein OS=Escherichia coli (strain K12) GN=malM PE=4 SV=1	malM	6	319.46	31905.6	2	240	909	1096	333	700	938	764	578	1070	1035	845	502	71	59	104	88	145	142	923	563	582	481
P16525	DNA replication terminus site-binding protein OS=Escherichia coli (strain K12) GN=tus PE=1 SV=1	tus	6	235.8	35743.1	1	18	32	NA	6	7	17	27	5	7	10	9	9	2	5	7	26	19	NA	NA	5	14	NA
P75818	Uncharacterized lipoprotein ybjP OS=Escherichia coli (strain K12) GN=ybjP PE=1 SV=1	ybjP	6	591.02	18961.5	2	1344	1174	1817	1806	2105	1919	1979	1413	1969	1960	1996	2133	5521	4404	3546	2807	3427	1852	1728	1991	1344	1324
P42616	Protein yqjC OS=Escherichia coli (strain K12) GN=yqjC PE=1 SV=3	yqjC	6	374.26	13879.2	1	503	451	NA	177	289	415	235	211	236	380	237	222	969	630	540	417	367	NA	NA	124	320	NA
P37005	Uncharacterized tRNA/rRNA methyltransferase LasT OS=Escherichia coli (strain K12) GN=lasT PE=3 SV=2	lasT	6	350.97	25225.1	2	70	100	170	25	46	66	52	26	51	37	34	26	24	17	47	72	65	62	57	42	38	51
P0A6P7	Probable GTP-binding protein engB OS=Escherichia coli (strain K12) GN=engB PE=1 SV=1	engB	6	364.97	23528.2	2	1218	1681	1735	706	962	1081	999	950	756	633	575	502	483	514	947	939	932	983	965	998	1094	1029
P0CE60	Transposase insH for insertion sequence element IS5-13 OS=Escherichia coli (strain K12) GN=JW5895 PE=3 SV=1	JW58	6	295.89	37809.3	2	47	133	95	20	63	59	56	65	53	46	33	28	17	13	26	34	26	44	44	43	51	45
Q46927	Uncharacterized protein ygdL OS=Escherichia coli (strain K12) GN=ygdL PE=3 SV=1	ygdL	6	194.88	28525.6	1	48	140	NA	40	65	63	39	46	30	39	10	26	9	24	140	170	174	NA	NA	24	32	NA
P27303	Multidrug resistance protein A OS=Escherichia coli (strain K12) GN=emrA PE=3 SV=2	emrA	5	260.62	42691.6	2	44	139	67	8	13	57	11	20	63	39	18	16	23	15	36	30	43	34	10	9	16	27
P0AAH8	Peptide transport system ATP-binding protein SapF OS=Escherichia coli (strain K12) GN=sapF PE=1 SV=1	sapF	5	203.01	30533.1	1	30	63	NA	12	54	25	29	2	12	17	6	6	9	12	106	46	15	NA	NA	13	15	NA
P75777	UPF0194 membrane protein ybhG OS=Escherichia coli (strain K12) GN=ybhG PE=3 SV=1	ybhG	5	307.24	36375.6	2	81	173	156	48	59	84	59	63	85	77	76	77	76	95	68	92	144	79	65	47	73	100
P31455	Uncharacterized protein YidR OS=Escherichia coli (strain K12) GN=yidR PE=4 SV=4	yidR	5	216.13	46139.8	2	107	63	58	58	77	83	91	62	62	57	53	49	162	94	179	141	274	131	112	101	100	112
P0AE85	Periplasmic protein CpxP OS=Escherichia coli (strain K12) GN=cpxP PE=1 SV=1	cpxP	5	249.98	18935.3	2	328	126	128	494	703	155	741	1483	98	132	140	129	11	9	67	524	31	175	519	304	405	348
P05637	Bis(5'-nucleosyl)-tetraphosphatase [symmetrical] OS=Escherichia coli (strain K12) GN=apaH PE=1 SV=2	apaH	5	276.12	31258.7	2	57	92	64	50	45	41	41	45	38	40	42	41	18	23	63	60	60	42	40	36	40	31
P0AFX9	Sigma-E factor regulatory protein rseB OS=Escherichia coli (strain K12) GN=rseB PE=1 SV=1	rseB	5	193.29	35709.3	2	91	100	80	66	76	81	85	89	54	57	59	99	76	51	105	176	136	93	79	138	93	106
P0AFB5	Nitrogen regulation protein NR(II) OS=Escherichia coli (strain K12) GN=glnL PE=1 SV=1	glnL	5	227.09	38514.3	2	66	15	23	10	10	17	24	13	21	18	27	33	7	3	15	23	31	18	25	29	18	31
P0AE70	mRNA interferase MazF OS=Escherichia coli (strain K12) GN=mazF PE=1 SV=1	mazF	5	293.79	12072.2	1	227	196	NA	161	138	208	72	266	103	196	37	170	118	269	87	173	91	NA	NA	71	65	NA
P46888	Universal stress protein C OS=Escherichia coli (strain K12) GN=uspC PE=2 SV=1	uspC	5	275.11	15604.9	1	260	99	NA	194	153	135	136	559	167	230	318	234	101	217	70	127	175	NA	NA	82	98	NA
P0AAB8	Universal stress protein D OS=Escherichia coli (strain K12) GN=uspD PE=2 SV=1	uspD	5	275.01	16264.5	2	320	403	293	364	195	457	253	200	224	266	260	300	1030	1348	1182	1046	1228	397	281	438	216	277
P31802	Nitrate/nitrite response regulator protein narP OS=Escherichia coli (strain K12) GN=narP PE=3 SV=1	narP	5	323.85	23542.4	2	251	816	433	146	272	302	250	216	177	182	151	124	55	35	159	301	183	210	278	214	319	275
P76270	Protein yebR OS=Escherichia coli (strain K12) GN=yebR PE=1 SV=2	msrC	5	308.29	18092.2	2	1051	1180	1210	894	1047	1040	1072	930	1352	1158	924	688	763	910	2127	1894	1802	1601	1067	1248	1177	3610
P0AAR3	Cys-tRNA(Pro)/Cys-tRNA(Cys) deacylase ybaK OS=Escherichia coli (strain K12) GN=ybaK PE=1 SV=1	ybaK	5	241.73	17064.2	2	519	761	660	330	297	643	319	294	532	419	383	321	865	858	1529	1057	2601	897	557	462	502	611
P21363	Protein yciE OS=Escherichia coli (strain K12) GN=yciE PE=1 SV=1	yciE	5	181.98	18931.5	2	309	177	143	391	287	388	261	236	283	303	362	455	164	192	418	367	307	149	409	410	349	170
P76235	UPF0229 protein yeaH OS=Escherichia coli (strain K12) GN=yeaH PE=3 SV=1	yeaH	5	287.33	49343.8	2	20	29	8	46	41	37	33	14	31	47	76	134	58	69	25	7	61	16	46	57	27	19
P0A8A2	UPF0082 protein yeeN OS=Escherichia coli (strain K12) GN=yeeN PE=1 SV=1	yeeN	5	254.88	25833.2	2	2098	4718	4988	1022	1080	1449	1136	1094	1096	784	573	376	881	947	2263	1610	2276	1705	1068	656	928	1247
P76346	Protein mtfA OS=Escherichia coli (strain K12) GN=mtfA PE=1 SV=2	mtfA	5	307.81	30242.1	2	431	790	1017	684	832	582	678	700	877	1032	1006	787	92	117	186	268	211	345	1088	779	1001	568
P22525	Probable L,D-transpeptidase YcbB OS=Escherichia coli (strain K12) GN=ycbB PE=1 SV=2	ycbB	5	294.83	67751.7	1	65	47	NA	37	20	55	43	39	59	46	46	47	104	19	58	57	78	NA	NA	24	24	NA
P32157	Protein yiiM OS=Escherichia coli (strain K12) GN=yiiM PE=1 SV=2	yiiM	5	333.07	25308.7	2	74	67	57	64	62	55	65	49	57	44	49	45	112	110	121	68	84	74	76	103	63	62
P32680	Uncharacterized protein yjaG OS=Escherichia coli (strain K12) GN=yjaG PE=4 SV=1	yjaG	5	256.75	22580.1	2	100	165	151	60	113	96	102	86	85	76	54	54	53	44	129	114	102	116	70	68	62	78
P76193	Probable L,D-transpeptidase YnhG OS=Escherichia coli (strain K12) GN=ynhG PE=1 SV=1	ynhG	5	332.93	36041.9	2	516	375	97	289	209	611	246	187	275	253	220	288	1039	369	947	415	1100	350	319	361	270	355
P27862	IMPACT family member yigZ OS=Escherichia coli (strain K12) GN=yigZ PE=1 SV=2	yigZ	5	222.23	21725.2	1	108	91	NA	43	77	55	48	210	40	57	35	49	24	25	76	82	79	NA	NA	36	48	NA
P0AF48	UPF0047 protein yjbQ OS=Escherichia coli (strain K12) GN=yjbQ PE=3 SV=1	yjbQ	5	271.95	15627.9	1	200	267	NA	154	62	173	119	85	171	91	104	152	108	73	131	166	176	NA	NA	152	108	NA
P39411	UPF0244 protein yjjX OS=Escherichia coli (strain K12) GN=yjjX PE=1 SV=2	yjjX	5	146.05	18183.3	1	415	443	NA	235	327	403	286	205	278	230	157	137	231	85	286	384	450	NA	NA	214	284	NA
P36680	UPF0289 protein yacF OS=Escherichia coli (strain K12) GN=yacF PE=3 SV=2	zapD	5	243.4	28255.8	2	294	554	385	184	273	252	269	208	184	166	158	164	167	115	253	394	281	398	266	287	292	386
P0A8Y3	Phosphatase yihX OS=Escherichia coli (strain K12) GN=yihX PE=1 SV=1	yihX	5	334.88	22699.4	2	131	331	270	213	253	154	171	263	294	379	471	359	71	145	165	210	154	161	238	171	152	100
P0AE22	Class B acid phosphatase OS=Escherichia coli (strain K12) GN=aphA PE=1 SV=1	aphA	5	256.75	26069.2	2	84	1679	344	88	118	160	83	95	131	184	196	146	34	42	74	90	62	59	82	70	81	36
P0A6X3	Protein hfq OS=Escherichia coli (strain K12) GN=hfq PE=1 SV=2	hfq	5	215.44	11141.6	2	1514	2273	1816	1084	1466	1464	1669	1431	1301	972	744	696	1554	1160	2304	1225	1987	1591	1187	1221	1626	1525
P76145	Trans-aconitate 2-methyltransferase OS=Escherichia coli (strain K12) GN=tam PE=1 SV=3	tam	5	298.94	28969.5	2	97	243	138	183	212	130	171	108	160	324	360	351	326	274	179	168	205	99	114	300	130	70
P0AGG8	Protein tldD OS=Escherichia coli (strain K12) GN=tldD PE=1 SV=1	tldD	5	407.16	51314.1	2	371	472	360	223	212	220	240	199	199	149	145	144	152	149	364	461	332	286	212	210	139	213
P12994	UPF0098 protein ybhB OS=Escherichia coli (strain K12) GN=ybhB PE=1 SV=2	ybhB	5	287.67	17056.3	2	316	180	303	246	271	353	277	261	193	230	246	231	519	502	647	376	561	183	326	411	322	275
P24188	UPF0176 protein yceA OS=Escherichia coli (strain K12) GN=yceA PE=2 SV=2	yceA	5	213.15	39737.5	2	67	38	190	10	30	20	28	20	17	7	2	2	1	4	18	21	8	22	13	11	41	33
P76272	Uncharacterized protein yebT OS=Escherichia coli (strain K12) GN=yebT PE=1 SV=2	yebT	5	289.93	94893.8	2	10	20	13	13	12	18	10	15	32	33	31	31	6	7	13	8	11	20	16	12	17	20
P33030	Uncharacterized protein YeiR OS=Escherichia coli (strain K12) GN=yeiR PE=3 SV=2	yeiR	5	286.59	36072.9	2	55	92	54	21	24	31	26	24	21	21	10	9	15	7	40	50	35	30	23	16	28	44
P0AD27	Inner membrane protein yejM OS=Escherichia coli (strain K12) GN=yejM PE=1 SV=1	yejM	5	310.36	67235.7	2	24	46	40	27	31	64	36	36	94	95	96	112	22	25	33	40	39	40	49	24	35	55
P77625	Phosphatase YfbT OS=Escherichia coli (strain K12) GN=yfbT PE=1 SV=2	yfbT	5	478.53	22975.1	2	1220	1166	1210	791	794	973	1106	801	969	820	771	599	480	505	1003	929	950	943	983	642	551	954
P42599	Uncharacterized oxidoreductase ygjR OS=Escherichia coli (strain K12) GN=ygjR PE=3 SV=3	ygjR	5	350.03	36173.3	2	186	299	275	237	276	223	249	284	279	306	350	436	173	181	117	149	132	202	276	284	241	164
P0AEQ1	Protein glcG OS=Escherichia coli (strain K12) GN=glcG PE=3 SV=1	glcG	5	312.73	13710.1	2	148	460	353	2050	538	515	295	124	592	1214	1346	1091	529	492	104	92	103	60	310	444	256	128
P0A756	Glutathione-regulated potassium-efflux system ancillary protein kefG OS=Escherichia coli (strain K12) GN=kefG PE=3 SV=1	kefG	5	208.02	20926.6	1	115	105	NA	65	78	106	99	62	78	182	37	52	21	24	161	86	166	NA	NA	44	60	NA
P76535	N-acetylmuramic acid 6-phosphate etherase OS=Escherichia coli (strain K12) GN=murQ PE=1 SV=1	murQ	5	464.48	31182.1	2	39	417	305	67	132	94	107	68	102	132	90	90	38	21	41	26	36	47	96	64	92	60
P0AFB1	Lipoprotein nlpI OS=Escherichia coli (strain K12) GN=nlpI PE=1 SV=1	nlpI	5	300.77	33581.8	2	299	265	298	247	258	282	239	277	243	225	196	160	183	193	221	167	213	238	259	225	289	236
P77756	7-cyano-7-deazaguanine synthase OS=Escherichia coli (strain K12) GN=queC PE=1 SV=1	queC	5	287.42	25479.7	2	306	551	495	193	171	223	228	288	212	158	142	149	120	95	351	205	285	235	193	132	171	206
P31473	ATPase ravA OS=Escherichia coli (strain K12) GN=ravA PE=1 SV=2	ravA	5	307.95	56335.6	2	33	59	36	38	37	44	43	39	59	48	59	47	52	35	31	48	57	27	38	23	33	46
P75849	Uncharacterized protein ycbL OS=Escherichia coli (strain K12) GN=ycbL PE=3 SV=1	ycbL	5	291.86	23750.9	2	842	732	461	675	692	600	615	608	474	614	553	527	137	197	452	580	556	595	514	376	452	771
P0AB28	Uncharacterized protein yceD OS=Escherichia coli (strain K12) GN=yceD PE=4 SV=1	yceD	5	259.59	19284.6	2	1173	2268	1659	460	720	887	843	638	728	546	489	345	472	427	1244	1167	1042	961	684	429	793	961
P76049	Uncharacterized protein ycjY OS=Escherichia coli (strain K12) GN=ycjY PE=1 SV=2	ycjY	5	323.19	33619.5	1	48	42	NA	10	51	34	40	15	24	52	34	65	31	32	15	48	24	NA	NA	25	32	NA
P0A8D6	UPF0189 protein ymdB OS=Escherichia coli (strain K12) GN=ymdB PE=1 SV=1	ymdB	5	245.81	18850.6	2	69	73	66	103	86	109	68	59	110	103	105	105	222	190	195	67	226	88	54	127	51	55
P77475	Phosphatase YqaB OS=Escherichia coli (strain K12) GN=yqaB PE=1 SV=1	yqaB	5	222.7	20748.5	2	159	345	266	53	118	74	69	112	32	20	8	10	32	4	19	71	31	24	26	14	17	19
P0AF67	UPF0079 ATP-binding protein yjeE OS=Escherichia coli (strain K12) GN=yjeE PE=3 SV=1	tsaE	5	310.7	16824.4	2	914	926	879	652	738	759	888	778	700	592	621	526	543	298	710	1507	1066	794	720	768	706	899
P77580	Acetaldehyde dehydrogenase OS=Escherichia coli (strain K12) GN=mhpF PE=1 SV=1	mhpF	5	204.08	33403.2	1	256	201	NA	77	107	136	96	82	162	189	89	82	35	28	211	189	201	NA	NA	57	136	NA
P76004	Uncharacterized protein ycgM OS=Escherichia coli (strain K12) GN=ycgM PE=1 SV=1	ycgM	5	200.78	23678.1	2	103	101	123	126	148	123	180	136	141	175	221	249	154	119	333	188	260	216	156	357	169	162
P16869	FhuE receptor OS=Escherichia coli (strain K12) GN=fhuE PE=1 SV=2	fhuE	5	456.42	81164.1	2	19	13	18	16	12	19	11	12	10	10	6	6	86	88	156	12	33	67	10	12	9	10
P0AAH0	Phosphate import ATP-binding protein PstB OS=Escherichia coli (strain K12) GN=pstB PE=1 SV=2	pstB	5	284.7	28990.8	2	113	183	161	42	83	78	118	119	97	66	53	51	16	5	27	70	41	108	84	48	78	79
P39830	Inner membrane protein ybaL OS=Escherichia coli (strain K12) GN=ybaL PE=1 SV=2	ybaL	5	282.63	59367.2	2	86	195	128	59	102	107	123	83	174	139	115	106	59	52	73	87	54	100	110	79	83	114
P37617	Lead, cadmium, zinc and mercury-transporting ATPase OS=Escherichia coli (strain K12) GN=zntA PE=1 SV=1	zntA	5	266.38	76773.8	2	12	77	28	4	4	14	6	10	22	10	11	9	3	1	17	20	24	12	10	5	3	15
P0AC62	Glutaredoxin-3 OS=Escherichia coli (strain K12) GN=grxC PE=1 SV=2	grxC	5	267.67	9113.62	2	4265	8387	8391	4706	5917	5765	6170	5324	6377	6220	5979	5877	5422	4895	9897	6972	7720	6501	4797	7850	4569	5558
P0C054	Small heat shock protein ibpA OS=Escherichia coli (strain K12) GN=ibpA PE=1 SV=1	ibpA	5	284.87	15746.1	2	363	2639	1368	235	363	376	362	206	399	348	186	113	132	116	255	627	259	312	322	169	380	400
P0A744	Peptide methionine sulfoxide reductase msrA OS=Escherichia coli (strain K12) GN=msrA PE=1 SV=2	msrA	5	363.31	23282.1	2	687	730	509	533	573	682	692	655	400	425	514	442	747	704	1236	826	1400	714	680	823	496	646
P0A7A5	Protein-L-isoaspartate O-methyltransferase OS=Escherichia coli (strain K12) GN=pcm PE=1 SV=2	pcm	5	423.67	23225.3	2	188	255	229	149	181	184	184	196	151	140	141	147	154	130	249	536	269	208	228	232	247	198
P0A9L5	Peptidyl-prolyl cis-trans isomerase C OS=Escherichia coli (strain K12) GN=ppiC PE=1 SV=2	ppiC	5	189.55	10207.4	2	1088	1976	2513	912	1216	872	1305	1020	1157	949	908	664	205	157	1207	762	979	1373	938	1226	1210	1512
P0A832	SsrA-binding protein OS=Escherichia coli (strain K12) GN=smpB PE=1 SV=2	smpB	5	258.26	18239.7	2	330	603	479	207	268	393	343	323	381	278	252	225	250	333	355	558	331	343	267	218	259	390
P0AEE3	Protease degS OS=Escherichia coli (strain K12) GN=degS PE=1 SV=1	degS	5	239.84	37539.9	2	74	44	45	73	62	63	77	89	119	99	94	88	44	47	39	114	69	75	78	53	68	97
P0AC69	Glutaredoxin-4 OS=Escherichia coli (strain K12) GN=grxD PE=1 SV=1	grxD	5	414.43	12852.5	2	6421	6032	6060	2829	3480	4494	4245	3285	4504	3171	2810	2277	976	910	4481	7715	5047	5360	4287	5100	4256	4874
P75867	Putative Lon protease homolog OS=Escherichia coli (strain K12) GN=ycbZ PE=3 SV=1	ycbZ	5	197.76	65759.2	2	39	106	51	32	37	42	38	36	42	32	31	31	35	36	39	39	44	43	30	29	31	42
P64554	7-carboxy-7-deazaguanine synthase homolog OS=Escherichia coli (strain K12) GN=ygcF PE=1 SV=1	queE	5	392.67	24995.6	2	192	620	270	95	116	107	150	119	118	88	72	61	36	44	188	160	197	158	129	90	119	201
P28249	Protein AsmA OS=Escherichia coli (strain K12) GN=asmA PE=4 SV=2	asmA	5	159.69	68902.1	2	25	41	28	32	32	39	33	39	47	43	52	48	13	14	11	23	23	27	32	26	34	37
P0AD68	Peptidoglycan synthase ftsI OS=Escherichia coli (strain K12) GN=ftsI PE=1 SV=1	ftsI	5	213.82	63819.5	2	11	26	22	15	12	19	14	25	16	10	9	5	0	1	7	16	12	17	20	9	15	14
P61316	Outer-membrane lipoprotein carrier protein OS=Escherichia coli (strain K12) GN=lolA PE=1 SV=1	lolA	5	370.46	22465.2	2	716	1385	827	643	568	754	687	663	434	327	281	242	619	523	870	604	830	622	445	382	353	515
P0A722	Acyl-[acyl-carrier-protein]--UDP-N-acetylglucosamine O-acyltransferase OS=Escherichia coli (strain K12) GN=lpxA PE=1 SV=1	lpxA	5	283.4	28044.4	2	974	1486	1211	637	859	943	1005	1010	829	766	649	617	406	385	778	888	649	1023	993	840	978	1112
P10441	Lipid-A-disaccharide synthase OS=Escherichia coli (strain K12) GN=lpxB PE=1 SV=2	lpxB	5	111.05	42337.2	2	31	64	55	23	28	30	30	33	29	26	30	31	19	11	20	21	19	25	18	28	20	30
P37773	UDP-N-acetylmuramate:L-alanyl-gamma-D-glutamyl-meso-diaminopimelate ligase OS=Escherichia coli (strain K12) GN=mpl PE=1 SV=3	mpl	5	414.38	49824.1	2	353	705	510	213	221	249	284	271	255	186	200	165	109	142	262	325	192	334	248	193	256	248
P17443	UDP-N-acetylglucosamine--N-acetylmuramyl-(pentapeptide) pyrophosphoryl-undecaprenol N-acetylglucosamine transferase OS=Escherichia coli (strain K12) GN=murG PE=1 SV=3	murG	5	271.28	37772.9	2	92	133	98	74	61	76	91	109	89	62	47	52	59	48	70	172	99	107	78	71	97	116
P0A927	Nucleoside-specific channel-forming protein tsx OS=Escherichia coli (strain K12) GN=tsx PE=1 SV=1	tsx	5	266.59	33549.9	2	1329	9242	1488	628	864	1178	752	725	1175	984	942	774	645	612	1097	1167	1262	1044	1064	497	1060	1256
P37751	Uncharacterized protein yefI OS=Escherichia coli (strain K12) GN=yefI PE=4 SV=1	wbbK	5	209.13	43142.6	2	61	178	98	42	57	65	60	50	98	80	54	43	30	26	23	31	25	43	36	26	32	40
P45395	Arabinose 5-phosphate isomerase OS=Escherichia coli (strain K12) GN=kdsD PE=1 SV=1	kdsD	5	276.66	35155.1	2	84	159	132	65	75	65	93	90	104	78	67	52	7	11	35	110	93	60	63	45	58	59
P75830	Macrolide-specific efflux protein macA OS=Escherichia coli (strain K12) GN=macA PE=1 SV=2	macA	5	247.39	40580.9	2	32	26	56	25	35	54	44	46	67	64	85	80	72	33	32	68	33	37	54	51	37	56
P76506	Probable phospholipid-binding lipoprotein mlaA OS=Escherichia coli (strain K12) GN=mlaA PE=1 SV=1	mlaA	5	175.65	28005.7	2	344	717	504	157	243	294	246	206	209	182	162	170	209	206	392	272	298	253	196	174	216	235
P33362	Putative osmoprotectant uptake system substrate-binding protein osmF OS=Escherichia coli (strain K12) GN=osmF PE=2 SV=1	osmF	5	319.85	32571.1	2	118	76	98	96	155	159	136	106	100	131	159	162	160	134	299	154	239	124	220	285	188	141
P24173	Lipopolysaccharide heptosyltransferase 1 OS=Escherichia coli (strain K12) GN=rfaC PE=1 SV=1	rfaC	5	186.81	35503.7	1	62	92	NA	24	32	46	36	33	25	27	4	11	1	8	63	63	55	NA	NA	9	46	NA
P27830	dTDP-glucose 4,6-dehydratase 2 OS=Escherichia coli (strain K12) GN=rffG PE=1 SV=3	rffG	5	332.15	39710.9	2	41	143	94	15	19	22	29	22	15	13	5	4	8	12	20	22	22	24	12	5	22	24
P0A6U5	Ribosomal RNA small subunit methyltransferase G OS=Escherichia coli (strain K12) GN=rsmG PE=1 SV=1	rsmG	5	197.39	23398.4	2	409	716	555	269	227	273	258	212	265	204	159	126	216	201	429	479	337	388	232	183	238	321
P0AG00	Lipopolysaccharide biosynthesis protein wzzE OS=Escherichia coli (strain K12) GN=wzzE PE=1 SV=2	wzzE	5	340.45	39445.9	2	140	300	171	112	114	132	117	121	150	125	97	110	41	63	102	113	129	140	98	64	122	128
P15038	Helicase IV OS=Escherichia coli (strain K12) GN=helD PE=1 SV=2	helD	5	224.88	77909.5	2	38	61	43	34	32	40	37	37	59	50	39	37	25	31	30	53	52	45	31	20	34	47
P0ACF0	DNA-binding protein HU-alpha OS=Escherichia coli (strain K12) GN=hupA PE=1 SV=1	hupA	5	342.65	9511.18	2	132932	278633	183555	73951	101840	108914	135752	125621	95458	86223	71746	65848	72526	75795	130782	117479	123190	134243	123301	91754	121273	118656
P12295	Uracil-DNA glycosylase OS=Escherichia coli (strain K12) GN=ung PE=1 SV=2	ung	5	243.27	25659.2	2	113	194	133	66	69	74	64	60	60	64	50	34	34	28	117	93	146	97	74	46	60	81
P32664	NADH pyrophosphatase OS=Escherichia coli (strain K12) GN=nudC PE=1 SV=2	nudC	5	201.46	29651.8	2	147	133	147	77	102	104	109	78	83	71	58	46	91	82	155	177	216	130	93	102	85	118
P20083	DNA topoisomerase 4 subunit B OS=Escherichia coli (strain K12) GN=parE PE=1 SV=3	parE	5	317.47	70181.7	2	39	100	53	21	31	35	38	29	41	31	24	22	35	15	49	56	40	31	30	15	24	40
P04994	Exodeoxyribonuclease 7 large subunit OS=Escherichia coli (strain K12) GN=xseA PE=1 SV=2	xseA	5	262.16	51782.2	2	35	35	40	36	37	47	38	35	67	59	52	52	47	34	66	72	67	57	40	34	59	70
P0ACP5	HTH-type transcriptional regulator gntR OS=Escherichia coli (strain K12) GN=gntR PE=1 SV=1	gntR	5	326.07	36380.8	2	577	972	856	461	484	547	612	422	427	363	347	400	1207	599	864	996	652	855	525	580	526	625
P77569	Mhp operon transcriptional activator OS=Escherichia coli (strain K12) GN=mhpR PE=4 SV=2	mhpR	5	300.35	31284.4	2	11	128	56	88	92	50	25	59	70	109	88	91	12	6	22	13	18	30	124	73	98	46
P0AFX4	Regulator of sigma D OS=Escherichia coli (strain K12) GN=rsd PE=1 SV=1	rsd	5	361.99	18213.4	2	239	370	291	285	411	386	394	442	363	465	492	344	100	69	308	386	319	239	464	463	450	299
P0ACN4	HTH-type transcriptional repressor AllR OS=Escherichia coli (strain K12) GN=allR PE=1 SV=1	allR	5	243.93	29233.3	2	206	179	220	113	130	159	154	118	133	101	89	69	103	93	185	378	226	258	128	125	153	193
P24242	HTH-type transcriptional regulator AscG OS=Escherichia coli (strain K12) GN=ascG PE=1 SV=3	ascG	5	304.85	36903	1	17	44	NA	13	44	33	30	24	14	6	8	6	4	4	28	27	23	NA	NA	14	20	NA
P0A8R9	HTH-type transcriptional regulator hdfR OS=Escherichia coli (strain K12) GN=hdfR PE=3 SV=1	hdfR	5	219.56	31708.4	1	73	180	NA	49	156	82	65	50	47	31	178	14	8	9	117	101	91	NA	NA	24	62	NA
P0AGB6	RNA polymerase sigma-E factor OS=Escherichia coli (strain K12) GN=rpoE PE=1 SV=1	rpoE	5	320.17	21664.3	2	389	565	326	170	252	314	273	363	225	168	164	154	184	211	283	496	395	349	227	239	259	290
P23917	Fructokinase OS=Escherichia coli (strain K12) GN=mak PE=1 SV=2	mak	5	380.03	32461.3	2	201	268	374	226	269	253	322	218	200	234	247	291	177	151	207	199	261	197	262	256	263	198
P0A6K3	Peptide deformylase OS=Escherichia coli (strain K12) GN=def PE=1 SV=2	def	5	191.43	19298.3	2	886	1542	960	295	330	561	337	309	226	166	125	126	397	398	681	777	576	594	625	317	454	528
P0A8T1	Ribosomal protein L11 methyltransferase OS=Escherichia coli (strain K12) GN=prmA PE=1 SV=1	prmA	5	238.49	31838.9	2	201	449	455	120	118	160	124	101	114	83	57	67	130	235	318	250	455	639	108	132	125	139
P0A7F9	S-adenosylmethionine:tRNA ribosyltransferase-isomerase OS=Escherichia coli (strain K12) GN=queA PE=1 SV=1	queA	5	221.09	39388	2	415	893	416	174	204	196	233	137	188	148	111	96	106	105	380	374	287	334	203	164	230	289
P0ADY7	50S ribosomal protein L16 OS=Escherichia coli (strain K12) GN=rplP PE=1 SV=1	rplP	5	373.6	15253.4	2	33115	98439	55901	16059	22880	28384	30152	21429	35190	20241	17245	15617	11506	13068	21529	31694	29183	35078	25872	17507	26480	44619
P0C018	50S ribosomal protein L18 OS=Escherichia coli (strain K12) GN=rplR PE=1 SV=1	rplR	5	237.17	12743.9	2	6146	13821	9136	2599	4078	4611	4900	3452	4045	2872	2218	2036	3534	2584	7465	8023	6006	6189	3958	2912	4144	5514
P0AG48	50S ribosomal protein L21 OS=Escherichia coli (strain K12) GN=rplU PE=1 SV=1	rplU	5	224.02	11539.2	2	7358	19424	11681	2979	4345	5726	6254	3971	7580	4443	3827	3534	4156	3365	4333	8180	6256	8110	5335	4313	6328	9538
P0A7R9	30S ribosomal protein S11 OS=Escherichia coli (strain K12) GN=rpsK PE=1 SV=2	rpsK	5	371.58	13818.4	2	10769	24642	19504	4947	7688	9319	9147	7877	8790	6070	4185	3674	4174	4769	10975	15122	12362	9933	7556	5181	8122	11421
P0A7S3	30S ribosomal protein S12 OS=Escherichia coli (strain K12) GN=rpsL PE=1 SV=2	rpsL	5	287.03	13710.5	2	2322	7473	6906	2054	2793	2484	3481	2342	7218	4277	3868	3250	2208	2148	4434	5609	4066	4146	1942	3054	2724	5137
P0A7T3	30S ribosomal protein S16 OS=Escherichia coli (strain K12) GN=rpsP PE=1 SV=1	rpsP	5	408.11	9166.94	2	65082	136596	98585	27682	40731	53819	51815	34971	38458	24935	20467	16641	39057	28165	71838	71626	69711	69775	49473	36144	51980	72100
P0A7U7	30S ribosomal protein S20 OS=Escherichia coli (strain K12) GN=rpsT PE=1 SV=2	rpsT	5	255.45	9660.31	2	28843	74646	44451	10866	18262	19945	21077	15929	19044	12092	9291	8042	8935	8751	26898	30295	25222	22164	17348	11077	18126	26995
P39199	Uncharacterized adenine-specific methylase yfcB OS=Escherichia coli (strain K12) GN=yfcB PE=3 SV=3	prmB	5	547.65	34961.5	2	1405	1400	1060	716	883	957	948	1146	867	807	735	610	423	379	1015	712	886	951	874	624	615	865
P0AD49	Ribosome-associated inhibitor A OS=Escherichia coli (strain K12) GN=raiA PE=1 SV=2	raiA	5	482	12758.6	2	2154	14293	3810	2223	2217	2418	3725	2511	2068	1731	1504	1296	2088	2755	1259	4186	982	2631	4017	2174	3411	3239
P06992	Ribosomal RNA small subunit methyltransferase A OS=Escherichia coli (strain K12) GN=rsmA PE=1 SV=1	rsmA	5	414.87	30382.6	2	253	451	319	111	132	118	172	140	104	78	61	67	104	88	156	244	176	154	118	74	147	178
P25397	Tellurite resistance protein TehB OS=Escherichia coli (strain K12) GN=tehB PE=1 SV=1	tehB	5	343.6	22498.4	2	224	236	228	173	163	185	162	146	166	157	126	96	562	425	865	317	342	282	164	147	154	200
P45748	tRNA threonylcarbamoyladenosine biosynthesis protein RimN OS=Escherichia coli (strain K12) GN=rimN PE=1 SV=2	tsaC	5	273.77	20736.7	2	414	727	602	347	324	416	347	260	292	224	167	176	251	251	503	337	574	496	324	306	368	421
P62615	4-diphosphocytidyl-2-C-methyl-D-erythritol kinase OS=Escherichia coli (strain K12) GN=ispE PE=1 SV=1	ispE	5	238.05	30887.8	2	186	161	191	158	189	174	220	190	150	128	113	93	83	92	151	221	215	80	156	120	170	159
P62617	2-C-methyl-D-erythritol 2,4-cyclodiphosphate synthase OS=Escherichia coli (strain K12) GN=ispF PE=1 SV=1	ispF	5	348.61	16868.8	2	1486	4893	4746	1169	1228	1196	1549	1227	1458	1220	1086	991	690	822	1748	1438	1597	1642	1653	1132	1693	1600
P13000	Dethiobiotin synthetase OS=Escherichia coli (strain K12) GN=bioD PE=1 SV=3	bioD	5	215.48	24106.4	2	440	127	460	315	256	213	202	209	305	229	170	119	222	254	618	606	427	279	160	168	164	212
P12998	8-amino-7-oxononanoate synthase OS=Escherichia coli (strain K12) GN=bioF PE=1 SV=1	bioF	5	254.56	41550.3	2	72	98	138	98	79	81	84	133	72	57	46	35	39	50	126	227	75	129	89	66	75	112
P0ABQ4	Dihydrofolate reductase OS=Escherichia coli (strain K12) GN=folA PE=1 SV=1	folA	5	264.31	17969.9	2	295	571	882	177	316	244	297	284	194	178	155	170	287	252	223	231	249	219	232	174	230	264
P0AC19	D-erythro-7,8-dihydroneopterin triphosphate epimerase OS=Escherichia coli (strain K12) GN=folX PE=1 SV=2	folX	5	290.44	14055.4	2	1182	1899	1789	640	1005	1177	1204	840	1127	855	695	526	1337	583	1541	2029	1521	1514	1002	669	991	1375
P32131	Oxygen-independent coproporphyrinogen-III oxidase OS=Escherichia coli (strain K12) GN=hemN PE=1 SV=4	hemN	5	349.43	52677.7	2	77	139	83	55	70	73	75	76	55	54	43	42	48	23	59	83	77	73	81	70	74	93
P10902	L-aspartate oxidase OS=Escherichia coli (strain K12) GN=nadB PE=1 SV=4	nadB	5	215.98	60281.4	2	30	9	70	10	7	18	21	28	25	17	11	8	15	15	29	36	41	24	22	10	17	37
P06611	Vitamin B12 import ATP-binding protein BtuD OS=Escherichia coli (strain K12) GN=btuD PE=1 SV=1	btuD	5	250	27046.1	1	63	106	NA	47	80	69	167	46	68	61	68	84	13	19	25	162	108	NA	NA	48	119	NA
P30749	Molybdopterin synthase catalytic subunit OS=Escherichia coli (strain K12) GN=moaE PE=1 SV=3	moaE	5	262.89	16952.5	2	458	485	374	269	235	301	308	300	211	123	108	98	445	411	1007	822	766	385	333	219	205	298
P0C0U4	Ribosomal protein S6 modification protein OS=Escherichia coli (strain K12) GN=rimK PE=3 SV=1	rimK	5	310.43	32398	1	50	92	NA	23	45	54	74	43	27	59	11	71	3	11	42	41	30	NA	NA	17	47	NA
P39265	D-allose-binding periplasmic protein OS=Escherichia coli (strain K12) GN=alsB PE=1 SV=1	alsB	5	234.48	32871.1	2	19	173	199	19	68	88	40	47	48	59	62	73	6	5	13	7	18	5	76	39	24	16
P04982	D-ribose pyranase OS=Escherichia coli (strain K12) GN=rbsD PE=1 SV=3	rbsD	5	304.55	15264.8	2	177	701	354	577	685	374	436	599	626	821	1139	1295	323	261	211	376	191	213	619	1426	670	372
P0AG07	Ribulose-phosphate 3-epimerase OS=Escherichia coli (strain K12) GN=rpe PE=1 SV=1	rpe	5	218.95	24520.6	1	524	557	NA	147	232	395	244	260	181	107	73	68	50	67	246	456	322	NA	NA	132	258	NA
P37643	Inner membrane metabolite transport protein yhjE OS=Escherichia coli (strain K12) GN=yhjE PE=1 SV=1	yhjE	5	442.67	47159.4	2	467	92	114	106	318	508	447	183	440	364	330	178	73	35	205	583	146	285	343	195	362	654
P77269	ABC transporter periplasmic-binding protein yphF OS=Escherichia coli (strain K12) GN=yphF PE=1 SV=1	yphF	5	230.75	35018.2	1	24	4	NA	4	11	15	7	6	10	124	7	72	12	4	6	32	17	NA	NA	12	8	NA
P28903	Anaerobic ribonucleoside-triphosphate reductase OS=Escherichia coli (strain K12) GN=nrdD PE=1 SV=2	nrdD	5	253.69	79954.1	2	30	52	29	32	37	27	48	26	64	63	48	41	3	7	39	38	9	26	34	27	22	19
P0AFF2	Nucleoside permease nupC OS=Escherichia coli (strain K12) GN=nupC PE=1 SV=1	nupC	5	203.79	43429.3	2	122	682	167	71	55	94	70	57	271	222	162	120	18	47	30	68	57	76	43	10	51	171
P0AG18	N5-carboxyaminoimidazole ribonucleotide mutase OS=Escherichia coli (strain K12) GN=purE PE=1 SV=2	purE	5	414.15	17751.2	2	3610	719	2287	2559	2076	2324	1914	2302	1877	1496	1261	1163	1582	1611	3987	3983	3655	2736	2248	2070	2446	2819
P39452	Ribonucleoside-diphosphate reductase 2 subunit alpha OS=Escherichia coli (strain K12) GN=nrdE PE=3 SV=3	nrdE	5	199.35	80410.3	2	14	8	17	8	9	11	12	14	25	11	7	4	7	10	40	8	9	40	10	18	9	13
P0ACE7	HIT-like protein hinT OS=Escherichia coli (strain K12) GN=hinT PE=1 SV=1	hinT	5	375.33	13214.9	2	1990	2825	2718	2056	1968	2285	2151	1559	2127	1999	1817	1399	1623	1635	3204	2970	3186	2484	2181	2140	2115	2095
P68398	tRNA-specific adenosine deaminase OS=Escherichia coli (strain K12) GN=tadA PE=1 SV=2	tadA	5	271.88	18687.4	1	26	14	NA	19	31	45	15	10	35	23	2	1	44	36	45	47	35	NA	NA	18	57	NA
P0A9Z1	Nitrogen regulatory protein P-II 1 OS=Escherichia coli (strain K12) GN=glnB PE=1 SV=1	glnB	5	260.89	12399.6	2	1276	2123	2456	857	1297	1024	1516	1323	1388	1108	905	714	796	690	1875	1104	1384	1373	814	890	1206	1315
P0AC81	Lactoylglutathione lyase OS=Escherichia coli (strain K12) GN=gloA PE=1 SV=1	gloA	5	244.4	14892.5	2	1966	1925	1960	1205	1706	1432	2436	1582	2016	1467	1388	917	605	1165	1889	1414	2515	1869	1615	1293	1793	2370
P06989	Histidine biosynthesis bifunctional protein HisIE OS=Escherichia coli (strain K12) GN=hisI PE=3 SV=3	hisI	5	344.77	22723.5	2	1903	432	2444	436	718	1015	1303	888	717	582	568	401	875	546	1345	2063	1540	1422	1069	726	1006	1515
P07109	Histidine transport ATP-binding protein HisP OS=Escherichia coli (strain K12) GN=hisP PE=1 SV=2	hisP	5	312.02	28617.1	2	142	26	63	60	122	145	110	124	114	134	136	152	51	69	85	141	101	83	95	119	109	110
P0AFM2	Glycine betaine-binding periplasmic protein OS=Escherichia coli (strain K12) GN=proX PE=1 SV=1	proX	5	326.36	35981.9	2	786	10094	1207	281	284	676	314	406	424	252	211	79	127	164	1622	139	165	232	401	281	434	234
Q5H772	Gamma-aminobutyrate aminotransferase OS=Escherichia coli (strain K12) GN=puuE PE=3 SV=1	puuE	5	253.86	44682.8	2	41	8	19	4	18	48	23	22	78	131	50	20	266	18	22	52	16	32	88	44	20	67
P77316	Uncharacterized zinc-type alcohol dehydrogenase-like protein YbdR OS=Escherichia coli (strain K12) GN=ybdR PE=3 SV=1	ybdR	5	214.65	44129.7	1	19	23	NA	11	4	14	10	8	8	24	21	29	2	5	12	6	7	NA	NA	6	6	NA
P22524	Chromosome partition protein mukE OS=Escherichia coli (strain K12) GN=mukE PE=1 SV=5	mukE	5	288.07	26939.6	2	340	683	387	228	237	248	271	287	306	294	224	210	17	18	248	211	173	285	252	175	242	216
P69506	Iron-sulfur cluster repair protein YtfE OS=Escherichia coli (strain K12) GN=ytfE PE=1 SV=1	ytfE	5	303.23	24848.6	2	6	70	49	7	6	10	4	3	5	6	3	3	159	188	340	11	127	19	5	4	3	3
P0A830	Aerobic C4-dicarboxylate transport protein OS=Escherichia coli (strain K12) GN=dctA PE=1 SV=1	dctA	5	231.11	45388.7	2	37	623	364	207	596	125	97	126	256	403	564	586	112	29	94	59	55	56	204	243	567	73
P28861	Ferredoxin--NADP reductase OS=Escherichia coli (strain K12) GN=fpr PE=1 SV=4	fpr	5	195.94	27715.3	2	184	194	161	133	138	221	129	147	104	107	93	76	81	120	292	135	223	139	153	116	107	124
P0AEX5	Probable phosphoribulokinase OS=Escherichia coli (strain K12) GN=prkB PE=3 SV=1	prkB	5	537.41	32305.5	2	173	155	229	245	289	292	291	305	291	245	285	266	102	156	179	164	237	255	195	231	205	257
P0ACY1	Putative NAD(P)H nitroreductase ydjA OS=Escherichia coli (strain K12) GN=ydjA PE=1 SV=1	ydjA	5	368.45	20028.1	2	2013	2523	2084	1660	1766	2098	2045	1877	1828	1507	1398	1252	3063	3947	2567	1808	2940	2412	2014	1387	1784	2148
P0ACB4	Protoporphyrinogen IX dehydrogenase [menaquinone] OS=Escherichia coli (strain K12) GN=hemG PE=1 SV=1	hemG	5	283.55	21194.9	2	106	250	172	77	106	175	152	144	143	136	113	64	50	54	116	142	144	128	106	72	77	100
P20099	Biotin sulfoxide reductase OS=Escherichia coli (strain K12) GN=bisC PE=3 SV=3	bisC	5	262.53	85778.3	2	31	14	13	12	17	19	25	18	11	9	8	6	4	5	39	42	51	51	24	24	25	45
P18775	Anaerobic dimethyl sulfoxide reductase chain A OS=Escherichia coli (strain K12) GN=dmsA PE=1 SV=2	dmsA	5	293.36	90323.1	2	1	9	2	1	2	1	2	2	2	1	1	1	2	2	3	1	3	1	1	1	2	1
P0AC47	Fumarate reductase iron-sulfur subunit OS=Escherichia coli (strain K12) GN=frdB PE=1 SV=2	frdB	5	250.45	27087.2	2	165	592	260	138	380	176	153	210	159	247	237	232	108	120	186	226	198	106	121	120	277	170
P0ADK6	Protein yibA OS=Escherichia coli (strain K12) GN=yibA PE=1 SV=1	yibA	5	157.05	31835.6	1	31	46	NA	19	8	60	67	8	13	9	9	18	140	0	19	32	19	NA	NA	16	8	NA
P26649	Glycogen synthesis protein glgS OS=Escherichia coli (strain K12) GN=glgS PE=1 SV=1	glgS	5	192.39	7868.6	1	27	41	NA	17	14	36	10	12	41	20	17	11	765	111	37	30	17	NA	NA	4	14	NA
P0ACE3	Hemolysin expression-modulating protein OS=Escherichia coli (strain K12) GN=hha PE=1 SV=1	hha	5	245.15	8604.46	2	198	237	178	50	90	39	110	63	43	22	19	17	21	18	104	144	44	45	44	18	27	44
P76002	Uncharacterized protein ycgK OS=Escherichia coli (strain K12) GN=ycgK PE=1 SV=1	pliG	5	314.16	14878.7	2	485	204	257	288	411	305	415	326	213	285	231	167	332	428	372	594	545	178	288	271	270	169
P69411	Protein rcsF OS=Escherichia coli (strain K12) GN=rcsF PE=4 SV=1	rcsF	5	305.21	14136.2	2	779	910	777	471	545	679	603	752	654	605	532	477	832	867	1177	1907	1101	794	633	487	570	653
P75791	Uncharacterized protein ybiU OS=Escherichia coli (strain K12) GN=ybiU PE=1 SV=1	ybiU	5	261.68	47281.6	2	56	46	89	20	23	34	33	29	38	30	26	19	16	6	70	23	52	36	32	22	22	35
P64455	Uncharacterized protein ydcY OS=Escherichia coli (strain K12) GN=ydcY PE=4 SV=1	ydcY	5	243.65	8776.45	2	380	533	405	228	231	243	275	230	231	190	178	155	48	236	725	688	783	459	246	213	231	363
P0AD10	Uncharacterized protein yecJ OS=Escherichia coli (strain K12) GN=yecJ PE=4 SV=1	yecJ	5	328.61	9098.77	2	460	956	1320	224	310	387	385	379	375	242	181	97	325	132	650	589	373	457	489	160	550	838
P0ADS9	Uncharacterized protein yggN OS=Escherichia coli (strain K12) GN=yggN PE=4 SV=1	yggN	5	230.55	26394.6	2	171	314	267	106	116	133	124	147	103	110	109	100	119	73	183	130	129	74	101	107	105	104
P0ADK8	Uncharacterized protein yibL OS=Escherichia coli (strain K12) GN=yibL PE=1 SV=1	yibL	5	176.85	13669.3	2	1538	1540	3880	1166	2397	2925	2735	1909	2549	2699	2088	1669	666	1245	1579	1308	1485	2478	2324	1995	2891	2335
P45800	Putative membrane protein igaA homolog OS=Escherichia coli (strain K12) GN=yrfF PE=1 SV=1	yrfF	5	236.01	79421.8	2	41	70	50	30	44	45	33	27	73	72	70	58	13	15	22	40	40	30	51	23	39	44
P0CB39	Phosphoethanolamine transferase CptA OS=Escherichia coli (strain K12) GN=cptA PE=1 SV=1	eptC	5	155.07	66549.8	2	53	54	61	16	31	40	39	30	47	33	24	17	36	18	36	50	33	43	29	14	39	55
P27829	UDP-N-acetyl-D-mannosamine dehydrogenase OS=Escherichia coli (strain K12) GN=wecC PE=3 SV=4	wecC	5	214.83	45791.6	2	111	336	225	40	58	62	69	60	58	42	32	15	33	39	66	100	74	85	45	24	68	83
P0AAH4	Peptide transport system ATP-binding protein SapD OS=Escherichia coli (strain K12) GN=sapD PE=3 SV=1	sapD	4	287.56	37618.4	1	23	24	NA	2	13	7	10	7	8	9	1	3	0	1	11	15	5	NA	NA	3	7	NA
P0ABU9	Protein tolQ OS=Escherichia coli (strain K12) GN=tolQ PE=1 SV=1	tolQ	4	242.35	25563.4	2	268	378	310	149	199	200	241	212	278	220	180	162	205	155	245	389	272	202	190	137	165	230
P0AE82	Sensor protein CpxA OS=Escherichia coli (strain K12) GN=cpxA PE=1 SV=1	cpxA	4	235.68	51573.9	2	45	50	41	40	49	37	47	67	48	47	44	57	20	33	31	63	36	43	67	47	53	69
P0A9E5	Fumarate and nitrate reduction regulatory protein OS=Escherichia coli (strain K12) GN=fnr PE=1 SV=1	fnr	4	297.69	27931.3	2	609	1101	849	325	447	605	628	399	496	373	314	198	98	96	315	382	386	613	553	384	764	689
P0AA89	Diguanylate cyclase DosC OS=Escherichia coli (strain K12) GN=dosC PE=1 SV=1	dosC	4	197.68	53126.6	2	7	13	7	17	18	20	10	12	20	35	35	49	32	25	5	2	34	9	14	23	20	12
P0ACZ4	Positive transcription regulator evgA OS=Escherichia coli (strain K12) GN=evgA PE=1 SV=1	evgA	4	191.47	22657.8	2	52	116	67	66	24	30	17	45	21	11	8	7	14	27	66	45	50	110	55	22	46	84
P0AED5	Response regulator uvrY OS=Escherichia coli (strain K12) GN=uvrY PE=1 SV=1	uvrY	4	192.84	23859.4	2	123	184	147	65	88	103	117	92	99	65	65	35	20	19	86	122	76	113	91	54	78	124
P39176	Probable L,D-transpeptidase ErfK/SrfK OS=Escherichia coli (strain K12) GN=erfK PE=1 SV=2	erfK	4	407.55	34371.6	2	69	74	53	109	97	112	91	59	82	97	119	111	139	159	125	135	161	88	100	153	90	96
P0AAC8	Iron-binding protein iscA OS=Escherichia coli (strain K12) GN=iscA PE=1 SV=1	iscA	4	178.35	11530.7	2	1451	1953	1952	730	853	863	1190	736	1059	700	436	317	91	93	1569	1411	856	2048	1122	774	1257	1784
P0AAA1	Inner membrane protein yagU OS=Escherichia coli (strain K12) GN=yagU PE=1 SV=1	yagU	4	264.36	22933.9	2	651	1554	1326	294	386	1010	382	279	1308	908	736	556	1596	2131	1450	376	2060	601	279	261	328	362
P77717	Uncharacterized lipoprotein ybaY OS=Escherichia coli (strain K12) GN=ybaY PE=1 SV=1	ybaY	4	315.42	19401.3	2	4627	1904	4249	4735	3214	4899	2992	2256	3361	3462	3629	4357	10343	10327	10289	4977	9222	3519	3924	5840	3160	3206
P0AAS7	Uncharacterized protein ybcJ OS=Escherichia coli (strain K12) GN=ybcJ PE=1 SV=1	ybcJ	4	176.96	7366.85	2	408	307	513	238	388	274	433	348	403	288	242	211	294	280	773	348	710	617	263	305	389	510
P0A8J4	UPF0250 protein ybeD OS=Escherichia coli (strain K12) GN=ybeD PE=1 SV=1	ybeD	4	414.11	9803.11	2	4131	9771	10107	3175	2411	3870	2898	4574	3561	3166	2342	2321	204	156	3477	4390	2739	2875	2873	2065	2866	3260
P0AB55	Protein yciI OS=Escherichia coli (strain K12) GN=yciI PE=1 SV=1	yciI	4	130.8	10577.4	2	2116	1702	1903	1768	1576	2075	1923	1662	1745	1557	1330	966	2058	2052	3432	2277	3232	2619	1896	1485	1765	2338
P76243	Uncharacterized protein yeaO OS=Escherichia coli (strain K12) GN=yeaO PE=1 SV=2	yeaO	4	266.18	13359.9	2	221	198	187	327	231	292	155	206	261	226	249	149	239	186	308	260	318	259	208	176	111	141
P52007	Protein yecM OS=Escherichia coli (strain K12) GN=yecM PE=1 SV=3	yecM	4	257.8	21173.8	2	281	352	226	162	158	180	233	243	145	135	129	113	68	91	301	175	203	243	192	151	185	202
P33355	Uncharacterized protein yehS OS=Escherichia coli (strain K12) GN=yehS PE=4 SV=1	yehS	4	234.72	17943.5	2	33	82	17	18	19	21	37	24	21	16	12	18	18	13	18	25	12	23	13	12	15	23
P21515	Acyl carrier protein phosphodiesterase OS=Escherichia coli (strain K12) GN=acpH PE=3 SV=2	acpH	4	157.95	22928.4	1	22	51	NA	8	39	37	30	14	11	16	150	5	2	5	19	36	29	NA	NA	18	20	NA
P37794	UPF0249 protein ChbG OS=Escherichia coli (strain K12) GN=chbG PE=2 SV=2	chbG	4	151.37	27738.1	1	39	23	NA	17	10	26	19	52	18	25	11	20	10	4	15	5	32	NA	NA	16	21	NA
P68206	UPF0337 protein yjbJ OS=Escherichia coli (strain K12) GN=yjbJ PE=1 SV=1	yjbJ	4	158.23	8302.08	2	454	1729	1287	497	550	1118	432	394	345	399	519	885	7142	7210	2084	454	1659	572	402	750	325	394
P0AF50	Uncharacterized protein yjbR OS=Escherichia coli (strain K12) GN=yjbR PE=1 SV=1	yjbR	4	207.12	13493	2	415	592	520	552	503	661	481	512	418	386	469	539	985	958	846	624	1142	478	586	843	492	438
P64581	Uncharacterized protein yqjD OS=Escherichia coli (strain K12) GN=yqjD PE=4 SV=1	yqjD	4	297.36	11026.9	2	9434	7755	10044	10318	14154	11755	15551	9081	11297	11874	13555	15975	18509	19615	19712	11398	15536	11955	14304	21360	11925	10706
P76035	Uncharacterized protein yciW OS=Escherichia coli (strain K12) GN=yciW PE=4 SV=2	yciW	4	206.64	42175.5	2	70	8	26	68	73	91	69	67	60	42	31	22	1	3	37	21	117	37	58	55	75	75
P64559	UPF0350 protein ygfY OS=Escherichia coli (strain K12) GN=ygfY PE=1 SV=1	ygfY	4	166.41	10522.2	1	190	135	NA	184	30	554	231	329	734	220	401	371	47	45	161	74	125	NA	NA	146	645	NA
P0ADS2	Cell division protein ZapA OS=Escherichia coli (strain K12) GN=zapA PE=1 SV=1	zapA	4	323.51	12568.4	2	813	1232	826	449	556	673	635	623	502	380	279	348	567	514	1408	985	949	956	611	613	712	761
P32662	Phosphoglycolate phosphatase OS=Escherichia coli (strain K12) GN=gph PE=1 SV=1	gph	4	299.9	27354	2	738	882	879	414	569	521	578	518	469	368	315	240	160	184	737	787	711	571	468	307	435	460
Q47147	Putative glutamine amidotransferase yafJ OS=Escherichia coli (strain K12) GN=yafJ PE=4 SV=1	yafJ	4	204.27	28599.2	2	59	48	56	54	48	69	56	51	58	55	47	53	37	50	82	98	107	87	60	68	45	62
P75915	Uncharacterized protein ycdY OS=Escherichia coli (strain K12) GN=ycdY PE=3 SV=1	ycdY	4	340.76	20693.1	2	678	538	550	305	401	367	524	406	338	264	180	135	144	176	499	537	444	413	439	220	424	474
P31131	Protein YdeJ OS=Escherichia coli (strain K12) GN=ydeJ PE=3 SV=1	ydeJ	4	288.71	18291.2	2	12	9	13	33	18	26	9	9	16	27	53	98	29	30	22	12	23	8	9	38	9	8
P77376	Uncharacterized oxidoreductase ydgJ OS=Escherichia coli (strain K12) GN=ydgJ PE=1 SV=2	ydgJ	4	186.86	38215.6	2	53	43	26	81	110	89	94	109	55	55	49	87	13	59	74	35	111	96	90	147	132	121
P76329	Putative mannosyl-3-phosphoglycerate phosphatase OS=Escherichia coli (strain K12) GN=yedP PE=1 SV=1	yedP	4	432.05	30402.4	2	39	42	17	74	68	96	58	45	46	59	107	156	77	72	66	35	107	41	85	140	57	38
P63417	Uncharacterized N-acetyltransferase YhbS OS=Escherichia coli (strain K12) GN=yhbS PE=3 SV=1	yhbS	4	267.91	18504.3	2	628	1170	770	623	700	649	702	837	588	581	667	771	419	400	693	463	513	615	913	742	557	582
P0AGF2	Uncharacterized sufE-like protein ygdK OS=Escherichia coli (strain K12) GN=ygdK PE=1 SV=1	csdE	4	181.99	15912.3	2	196	222	186	129	129	201	173	136	139	100	103	95	214	271	553	389	367	242	150	152	149	191
P0AC84	Hydroxyacylglutathione hydrolase OS=Escherichia coli (strain K12) GN=gloB PE=1 SV=1	gloB	4	253.41	28398.3	2	282	278	246	359	276	245	275	237	246	331	301	327	130	158	250	127	219	206	389	245	287	207
P0A823	Sugar fermentation stimulation protein A OS=Escherichia coli (strain K12) GN=sfsA PE=3 SV=1	sfsA	4	178.01	26194.3	1	43	54	NA	15	51	25	20	10	17	41	67	6	13	16	49	36	16	NA	NA	13	19	NA
P39187	Uncharacterized protein ytfJ OS=Escherichia coli (strain K12) GN=ytfJ PE=1 SV=1	ytfJ	4	204.24	20389.7	2	44	400	307	43	67	234	60	61	110	147	132	94	66	26	28	33	15	26	73	32	56	45
P37631	Uncharacterized protein yhiN OS=Escherichia coli (strain K12) GN=yhiN PE=4 SV=3	yhiN	4	169.61	43695.4	1	53	91	NA	9	13	35	13	24	19	53	6	15	17	17	31	60	20	NA	NA	10	43	NA
P0AF56	Uncharacterized protein yjcO OS=Escherichia coli (strain K12) GN=yjcO PE=4 SV=1	yjcO	4	209.11	25045.3	1	128	44	NA	26	72	39	29	28	35	18	29	19	15	20	25	66	47	NA	NA	18	25	NA
P0A6G3	Protein YgaD OS=Escherichia coli (strain K12) GN=ygaD PE=1 SV=1	pncC	4	177.7	17552.7	2	87	152	163	89	123	96	123	102	110	120	116	92	80	66	122	111	113	104	89	110	83	101
P0ADI7	Isochorismatase family protein yecD OS=Escherichia coli (strain K12) GN=yecD PE=1 SV=2	yecD	4	184.52	20421.6	2	18	60	79	48	32	16	162	38	56	71	78	52	14	19	57	20	210	32	39	64	33	39
P77781	Esterase YdiI OS=Escherichia coli (strain K12) GN=ydiI PE=1 SV=1	ydiI	4	341.86	14917.7	2	313	230	205	232	243	219	267	278	193	168	132	94	125	105	303	448	303	275	244	184	218	292
P0ADP2	Uncharacterized protein yigI OS=Escherichia coli (strain K12) GN=yigI PE=4 SV=1	yigI	4	139.2	17133.8	2	107	231	170	109	127	153	92	134	130	105	91	81	135	111	259	344	274	156	114	98	116	103
P67826	Copper homeostasis protein CutC OS=Escherichia coli (strain K12) GN=cutC PE=3 SV=1	cutC	4	122.96	26726.4	2	77	92	85	41	46	58	55	53	47	41	41	35	3	24	79	55	61	54	41	35	58	35
P15028	Fe(3+) dicitrate-binding periplasmic protein OS=Escherichia coli (strain K12) GN=fecB PE=3 SV=3	fecB	4	184.67	33107.6	1	11	541	NA	4	5	11	3	7	5	6	9	8	1	9	7	15	10	NA	NA	3	4	NA
P09833	Molybdenum import ATP-binding protein ModC OS=Escherichia coli (strain K12) GN=modC PE=1 SV=4	modC	4	319.18	39060	2	6	12	7	6	7	9	8	15	33	217	264	279	3	1	1	8	3	5	9	7	6	5
P0AB52	Protein ychN OS=Escherichia coli (strain K12) GN=ychN PE=1 SV=1	ychN	4	337.48	12666.7	2	2021	2386	2502	2835	2012	1640	1227	2061	1817	1983	1771	1804	813	981	1030	695	963	905	1332	1245	999	922
P0AGI8	Trk system potassium uptake protein trkA OS=Escherichia coli (strain K12) GN=trkA PE=1 SV=1	trkA	4	262.49	50318.4	2	42	137	57	51	43	52	44	36	67	67	84	84	38	37	18	65	29	28	30	27	25	32
P31827	Uncharacterized protein yddB OS=Escherichia coli (strain K12) GN=yddB PE=4 SV=2	yddB	4	202.45	89209.5	1	1	0	NA	1	5	6	1	1	5	13	0	0	1	1	2	1	1	NA	NA	2	6	NA
P15031	Fe(3+) dicitrate transport ATP-binding protein FecE OS=Escherichia coli (strain K12) GN=fecE PE=1 SV=1	fecE	4	237.81	28154.5	1	14	237	NA	2	6	8	6	5	5	1	5	2	17	2	3	36	10	NA	NA	1	5	NA
P0AC51	Zinc uptake regulation protein OS=Escherichia coli (strain K12) GN=zur PE=1 SV=1	zur	4	150.46	19223.6	2	70	130	130	90	97	129	103	137	141	121	120	115	51	39	68	49	74	76	104	136	86	91
P77202	Thiol:disulfide interchange protein DsbG OS=Escherichia coli (strain K12) GN=dsbG PE=1 SV=2	dsbG	4	158.36	27459.2	2	130	203	183	63	100	114	122	87	79	70	49	48	136	112	166	120	169	124	120	89	116	151
P23894	Protease HtpX OS=Escherichia coli (strain K12) GN=htpX PE=1 SV=1	htpX	4	184.81	31884.6	2	451	539	579	255	411	460	395	463	422	333	229	215	96	107	151	583	334	294	343	196	304	414
P0C058	Small heat shock protein ibpB OS=Escherichia coli (strain K12) GN=ibpB PE=1 SV=1	ibpB	4	161.5	16065.2	2	20	546	102	10	17	20	21	13	25	28	13	15	26	9	15	43	11	13	20	15	21	29
P0AEM0	FKBP-type 16 kDa peptidyl-prolyl cis-trans isomerase OS=Escherichia coli (strain K12) GN=fkpB PE=1 SV=2	fkpB	4	360.26	16052.9	2	1255	2785	2678	1531	1527	1411	1354	1175	1022	928	859	560	229	234	1162	1198	953	1096	1932	1241	1215	1749
P24554	DNA repair protein radA OS=Escherichia coli (strain K12) GN=radA PE=3 SV=1	radA	4	110.86	49422.6	2	39	48	44	24	26	39	33	43	45	40	34	37	5	14	24	77	45	80	33	35	33	58
P76256	M22 peptidase homolog yeaZ OS=Escherichia coli (strain K12) GN=yeaZ PE=1 SV=1	tsaB	4	217.44	25146.7	2	105	219	121	63	56	58	44	52	47	38	25	19	21	21	39	32	47	54	24	18	27	41
P0A725	UDP-3-O-[3-hydroxymyristoyl] N-acetylglucosamine deacetylase OS=Escherichia coli (strain K12) GN=lpxC PE=3 SV=1	lpxC	4	231.03	33916.2	2	131	133	149	90	130	119	115	109	99	99	123	101	59	49	151	193	96	108	127	133	109	100
P16926	Rod shape-determining protein mreC OS=Escherichia coli (strain K12) GN=mreC PE=3 SV=1	mreC	4	255.15	39487.8	2	51	88	77	26	42	37	64	51	36	29	21	21	11	13	15	37	24	36	28	22	28	39
P0A742	Large-conductance mechanosensitive channel OS=Escherichia coli (strain K12) GN=mscL PE=1 SV=1	mscL	4	495.61	14929.2	2	1409	1658	1460	1090	1308	2384	1548	1088	1801	1677	1915	1871	1945	1871	1816	1602	1959	1910	1445	1697	1086	1339
P22634	Glutamate racemase OS=Escherichia coli (strain K12) GN=murI PE=1 SV=2	murI	4	138.67	30964.2	2	67	186	85	63	66	67	51	62	80	77	54	47	49	34	81	92	93	85	58	50	52	71
P10100	Rare lipoprotein A OS=Escherichia coli (strain K12) GN=rlpA PE=1 SV=1	rlpA	4	250.85	37486.8	2	290	727	597	184	198	264	232	297	223	185	132	107	147	220	267	431	528	388	297	176	278	335
P0AA91	Uncharacterized lipoprotein yeaY OS=Escherichia coli (strain K12) GN=yeaY PE=4 SV=1	yeaY	4	201.64	20889.8	2	73	108	54	51	71	77	60	92	45	45	99	191	243	245	112	102	205	60	72	162	61	77
P0ADC1	LPS-assembly lipoprotein lptE OS=Escherichia coli (strain K12) GN=lptE PE=1 SV=1	lptE	4	207.07	21325.1	2	307	368	389	170	222	278	236	255	211	194	203	210	424	393	515	484	377	313	236	259	200	284
P39310	Uncharacterized protein ytfB OS=Escherichia coli (strain K12) GN=ytfB PE=4 SV=2	ytfB	4	186.12	23472.9	2	194	222	211	162	173	211	229	241	147	159	155	150	143	62	252	205	232	201	171	169	128	168
P39315	Quinone oxidoreductase 2 OS=Escherichia coli (strain K12) GN=qorB PE=1 SV=1	qorB	4	250.81	29697.3	2	269	131	260	171	176	224	234	192	220	170	171	165	84	92	233	217	494	173	246	200	238	286
P0ADE4	Uncharacterized protein ytfM OS=Escherichia coli (strain K12) GN=ytfM PE=1 SV=1	tamA	4	189.9	64738.1	2	36	60	44	25	24	36	29	24	23	20	20	16	32	35	65	37	41	35	24	29	22	27
Q47150	Antitoxin DinJ OS=Escherichia coli (strain K12) GN=dinJ PE=1 SV=1	dinJ	4	313.29	9382	2	260	344	254	196	155	174	138	140	154	136	113	97	28	16	189	111	183	179	156	144	127	177
P0ACF4	DNA-binding protein HU-beta OS=Escherichia coli (strain K12) GN=hupB PE=1 SV=1	hupB	4	301.23	9201.98	2	41918	80032	76978	29079	42130	47813	38259	41530	39205	49778	43029	34675	18759	16584	35054	18830	20880	34508	42737	25362	32349	26074
P23367	DNA mismatch repair protein mutL OS=Escherichia coli (strain K12) GN=mutL PE=1 SV=2	mutL	4	185.38	67863.7	2	8	11	4	10	13	13	15	17	27	28	27	29	13	6	8	8	10	9	14	7	11	12
P03018	DNA helicase II OS=Escherichia coli (strain K12) GN=uvrD PE=1 SV=1	uvrD	4	217.92	81920.3	2	31	119	57	32	30	47	36	30	53	39	43	42	26	11	32	29	29	38	25	30	30	36
P0A8G9	Exodeoxyribonuclease 7 small subunit OS=Escherichia coli (strain K12) GN=xseB PE=1 SV=2	xseB	4	208.62	8928.52	2	921	1353	1020	637	968	765	707	634	738	588	571	492	572	611	902	766	1068	735	848	697	965	827
Q93K97	ADP-ribose pyrophosphatase OS=Escherichia coli (strain K12) GN=nudF PE=1 SV=2	nudF	4	273.04	23634.1	2	139	179	163	106	123	116	125	116	86	95	108	76	55	50	132	152	96	104	176	133	95	122
P0AFH0	Methylated-DNA--protein-cysteine methyltransferase OS=Escherichia coli (strain K12) GN=ogt PE=1 SV=1	ogt	4	262.85	19148.9	1	57	42	NA	22	33	36	50	50	49	53	6	21	25	41	6	75	27	NA	NA	25	35	NA
P25888	ATP-dependent RNA helicase rhlE OS=Escherichia coli (strain K12) GN=rhlE PE=1 SV=3	rhlE	4	167.68	49940.8	2	25	54	9	2	2	5	2	1	2	1	1	1	1	0	1	1	1	1	0	0	0	0
P37128	GDP-mannose pyrophosphatase nudK OS=Escherichia coli (strain K12) GN=nudK PE=1 SV=2	nudK	4	178.09	21717.1	2	2491	5183	3571	1048	1875	1826	2147	1571	1704	1263	970	940	1161	1220	2200	2763	2287	2396	1759	1209	1770	2508
P0A9Y6	Cold shock-like protein CspC OS=Escherichia coli (strain K12) GN=cspC PE=1 SV=2	cspC	4	345.96	7379.75	2	58803	117057	101736	39126	55765	61231	53740	38415	50930	41281	33412	26165	25339	22162	67410	42695	75825	60589	55898	33464	53859	63286
P0A968	Cold shock-like protein CspD OS=Escherichia coli (strain K12) GN=cspD PE=1 SV=1	cspD	4	294.01	7945.89	2	1247	10716	6942	2724	6229	3808	4436	4438	4655	5523	4904	4740	322	111	729	1157	272	1646	4323	3656	6195	2494
P0A972	Cold shock-like protein CspE OS=Escherichia coli (strain K12) GN=cspE PE=1 SV=2	cspE	4	223.44	7440.8	2	17168	43365	24677	7177	16219	14742	17206	16629	11566	8889	6804	5641	1473	1034	11440	7685	12419	15989	13733	9117	17217	20953
P0ACL5	Glc operon transcriptional activator OS=Escherichia coli (strain K12) GN=glcC PE=4 SV=1	glcC	4	177.75	28790.3	2	19	94	48	42	76	52	22	54	58	83	57	70	14	22	99	19	70	53	42	40	52	13
P36771	Probable HTH-type transcriptional regulator lrhA OS=Escherichia coli (strain K12) GN=lrhA PE=4 SV=2	lrhA	4	177.24	34553.7	2	18	44	34	13	44	30	36	47	43	38	37	53	3	3	5	33	2	19	38	33	46	31
P0A8W0	Transcriptional regulator nanR OS=Escherichia coli (strain K12) GN=nanR PE=3 SV=1	nanR	4	251.29	29488.1	2	117	202	112	78	94	140	92	102	75	54	58	46	86	110	170	290	134	122	129	95	110	119
P0A6Z6	Nickel-responsive regulator OS=Escherichia coli (strain K12) GN=nikR PE=1 SV=1	nikR	4	422.5	15066.5	2	541	642	545	255	578	538	734	857	659	564	507	357	343	414	894	955	1154	902	952	744	744	916
P76086	Phenylacetic acid degradation operon negative regulatory protein paaX OS=Escherichia coli (strain K12) GN=paaX PE=1 SV=1	paaX	4	190.88	35254.6	2	11	32	31	25	36	19	18	26	47	70	65	64	3	7	9	18	13	11	28	39	40	33
P0ACL9	Pyruvate dehydrogenase complex repressor OS=Escherichia coli (strain K12) GN=pdhR PE=1 SV=1	pdhR	4	224.5	29389.4	2	102	106	48	52	83	42	48	324	61	43	28	29	19	35	79	86	96	104	42	23	36	86
P0ACR4	Uncharacterized HTH-type transcriptional regulator yeiE OS=Escherichia coli (strain K12) GN=yeiE PE=4 SV=1	yeiE	4	150.44	32685.2	2	122	161	104	66	67	69	74	46	60	45	45	37	29	22	28	53	42	36	35	29	27	42
P0ACK2	Putative aga operon transcriptional repressor OS=Escherichia coli (strain K12) GN=agaR PE=4 SV=1	agaR	4	130.9	29536.1	2	30	53	37	29	23	25	30	27	23	23	22	16	8	6	27	42	24	30	38	22	24	34
P32144	Uncharacterized HTH-type transcriptional regulator yihW OS=Escherichia coli (strain K12) GN=yihW PE=4 SV=2	yihW	4	148.82	28471.7	2	39	135	90	43	69	53	61	62	58	55	46	60	12	14	23	51	34	40	51	50	47	47
P0ACL7	Putative L-lactate dehydrogenase operon regulatory protein OS=Escherichia coli (strain K12) GN=lldR PE=2 SV=1	lldR	4	148.17	29129.9	1	17	115	NA	4	11	8	22	15	10	9	32	5	1	3	8	101	5	NA	NA	5	14	NA
P13669	Mannosyl-D-glycerate transport/metabolism system repressor mngR OS=Escherichia coli (strain K12) GN=mngR PE=1 SV=1	mngR	4	219.41	28237.6	1	54	3	NA	30	19	35	24	27	22	24	2	18	4	10	32	44	25	NA	NA	11	17	NA
P77295	Probable HTH-type transcriptional regulator ygaV OS=Escherichia coli (strain K12) GN=ygaV PE=1 SV=1	ygaV	4	398.22	10571.5	1	143	131	NA	88	130	74	88	58	72	94	158	45	48	56	80	123	122	NA	NA	53	89	NA
P0ACS5	HTH-type transcriptional regulator zntR OS=Escherichia coli (strain K12) GN=zntR PE=1 SV=1	zntR	4	149.32	16151	1	26	49	NA	16	48	23	25	29	19	33	66	4	2	4	10	16	21	NA	NA	5	22	NA
P06961	Multifunctional CCA protein OS=Escherichia coli (strain K12) GN=cca PE=1 SV=1	cca	4	145.73	46420	2	64	88	54	52	45	38	37	45	44	48	46	43	14	21	53	41	62	50	39	56	44	45
P69222	Translation initiation factor IF-1 OS=Escherichia coli (strain K12) GN=infA PE=1 SV=2	infA	4	271.54	8226.31	2	4495	9064	4501	1912	2537	3251	2424	2084	2658	2018	1730	1148	586	2202	5233	3883	5409	3266	2419	2091	2592	2997
P0A7I0	Peptide chain release factor 1 OS=Escherichia coli (strain K12) GN=prfA PE=1 SV=1	prfA	4	259.39	40474.2	2	231	374	244	98	177	149	218	174	140	115	66	80	42	46	96	114	102	63	70	71	80	79
P21338	Ribonuclease I OS=Escherichia coli (strain K12) GN=rna PE=1 SV=1	rna	4	135.8	29580.7	2	50	98	62	37	43	43	50	36	48	46	42	43	67	57	114	95	91	53	33	131	38	68
P0A7L3	50S ribosomal protein L20 OS=Escherichia coli (strain K12) GN=rplT PE=1 SV=2	rplT	4	230.63	13470.7	2	3577	11237	7671	1635	2591	3527	3342	2641	5807	3824	2937	2671	1463	2013	2516	6106	3773	4358	2736	1496	2870	6572
P0ADZ0	50S ribosomal protein L23 OS=Escherichia coli (strain K12) GN=rplW PE=1 SV=1	rplW	4	148.8	11174.2	2	1877	4678	3019	820	1366	1480	1749	1198	1499	1063	915	698	1092	1157	1582	2967	1859	1982	1401	1042	1529	2665
P0A7L8	50S ribosomal protein L27 OS=Escherichia coli (strain K12) GN=rpmA PE=1 SV=2	rpmA	4	178.36	9100.87	2	23305	59704	41239	9418	14556	15072	18782	12112	15956	9200	7875	6129	9227	8422	19294	25817	25927	20587	14819	11824	17917	26384
P0A7M6	50S ribosomal protein L29 OS=Escherichia coli (strain K12) GN=rpmC PE=1 SV=1	rpmC	4	372.37	7250.97	2	52939	119802	90391	24944	25887	37422	39271	31420	31319	23715	16960	14429	24808	23753	44300	46739	34985	57822	38010	25935	34005	48729
P0A7N4	50S ribosomal protein L32 OS=Escherichia coli (strain K12) GN=rpmF PE=1 SV=2	rpmF	4	368.52	6424.42	2	26636	68790	46264	11126	17757	19648	18420	13968	15444	11062	9690	6799	12717	11561	29231	26815	30557	22148	15179	9114	16295	23130
P0A7N9	50S ribosomal protein L33 OS=Escherichia coli (strain K12) GN=rpmG PE=1 SV=2	rpmG	4	324.7	6349.61	2	27960	66457	44359	10243	15394	18573	18238	13590	14514	10496	7894	6106	13596	12037	28079	28116	24767	21835	16087	10755	15398	23141
P0AG59	30S ribosomal protein S14 OS=Escherichia coli (strain K12) GN=rpsN PE=1 SV=2	rpsN	4	296.13	11555.3	2	10079	22731	16504	4660	6523	7236	7626	5645	6477	3999	3769	2410	4747	2924	8447	10970	9253	8288	6781	4970	7767	11923
P0ADZ4	30S ribosomal protein S15 OS=Escherichia coli (strain K12) GN=rpsO PE=1 SV=2	rpsO	4	413.65	10244.5	2	33110	60729	45009	18916	26735	23327	28045	22643	25282	17606	13940	12646	16267	23839	39018	41697	37367	47120	37857	28441	38531	62565
P0AG63	30S ribosomal protein S17 OS=Escherichia coli (strain K12) GN=rpsQ PE=1 SV=2	rpsQ	4	342.47	9680.27	2	4180	28222	21434	5658	9031	8400	9601	5935	14762	8697	7063	5297	5430	7179	17265	12899	15304	11276	2194	7723	5963	10147
P0AFX0	Probable sigma(54) modulation protein OS=Escherichia coli (strain K12) GN=yhbH PE=1 SV=1	hpf	4	310.28	10725.6	2	2312	1991	1929	2958	2551	2453	2450	2288	1980	2016	1669	2064	4011	3420	6194	3223	5197	2629	2426	2524	2143	1731
P37765	Ribosomal large subunit pseudouridine synthase B OS=Escherichia coli (strain K12) GN=rluB PE=1 SV=2	rluB	4	234.74	32673.4	2	114	294	204	64	90	112	78	60	153	117	103	92	45	32	73	109	99	107	78	56	78	109
P36929	Ribosomal RNA small subunit methyltransferase B OS=Escherichia coli (strain K12) GN=rsmB PE=1 SV=2	rsmB	4	353.13	48299	2	58	203	128	36	47	49	50	39	65	45	40	44	51	63	55	48	61	55	20	21	22	35
P0AGJ2	tRNA guanosine-2'-O-methyltransferase OS=Escherichia coli (strain K12) GN=trmH PE=1 SV=1	trmH	4	86.05	25308.7	2	25	70	50	12	16	24	13	15	10	6	6	6	9	3	3	2	8	3	7	3	8	6
P0AEB7	RutC family protein yoaB OS=Escherichia coli (strain K12) GN=yoaB PE=3 SV=1	yoaB	4	160.35	12467.3	2	1854	1764	1714	1379	1450	1590	1509	1378	1397	1128	929	917	976	1197	2653	2207	2099	1784	1643	1409	1616	2185
Q46893	2-C-methyl-D-erythritol 4-phosphate cytidylyltransferase OS=Escherichia coli (strain K12) GN=ispD PE=1 SV=3	ispD	4	216.4	25703.2	2	67	140	112	47	59	49	50	53	71	58	49	40	26	46	80	36	79	54	28	30	29	41
P0AGG2	Acyl-CoA thioesterase 2 OS=Escherichia coli (strain K12) GN=tesB PE=1 SV=2	tesB	4	208.68	31928.4	2	239	273	183	191	179	158	195	245	170	150	158	160	157	201	286	265	277	282	216	189	181	247
P0A6A8	Acyl carrier protein OS=Escherichia coli (strain K12) GN=acpP PE=1 SV=2	acpP	4	221.98	8616.21	2	28944	45220	44830	15267	28323	25541	28863	24576	22145	18604	15805	15707	34369	30818	44145	51498	41610	34870	30252	25650	29705	30852
P31551	Carnitinyl-CoA dehydratase OS=Escherichia coli (strain K12) GN=caiD PE=1 SV=4	caiD	4	162.22	28154.5	1	59	11	NA	12	16	11	12	10	28	36	35	11	11	12	1	8	19	NA	NA	9	22	NA
P0AGL5	Putative toxin YfjG OS=Escherichia coli (strain K12) GN=yfjG PE=1 SV=1	yfjG	4	372.65	17697.1	1	33	242	NA	6	14	15	11	11	9	17	12	1	6	19	54	23	54	NA	NA	5	8	NA
P62623	4-hydroxy-3-methylbut-2-enyl diphosphate reductase OS=Escherichia coli (strain K12) GN=ispH PE=1 SV=1	ispH	4	238.28	34734.9	2	224	430	403	119	156	135	207	180	143	123	85	62	11	68	104	150	140	153	144	92	135	190
P0A6H8	Cardiolipin synthase OS=Escherichia coli (strain K12) GN=cls PE=1 SV=1	clsA	4	163.6	54768.5	2	10	14	7	10	9	16	9	9	40	30	29	30	13	11	9	21	17	14	11	7	11	23
P0AF03	Molybdopterin adenylyltransferase OS=Escherichia coli (strain K12) GN=mog PE=1 SV=1	mog	4	204.99	21191	2	47	181	130	48	68	64	44	48	34	27	25	20	11	5	10	13	13	7	23	13	18	19
P40191	Pyridoxine kinase OS=Escherichia coli (strain K12) GN=pdxK PE=1 SV=2	pdxK	4	236.41	30810.1	2	52	222	228	148	94	152	145	121	235	183	143	101	77	83	272	88	199	172	80	83	85	80
P26602	Chorismate--pyruvate lyase OS=Escherichia coli (strain K12) GN=ubiC PE=1 SV=2	ubiC	4	147.07	18747	2	154	293	308	120	165	157	141	110	148	118	110	65	30	30	103	53	106	104	116	71	110	98
P12999	Biotin synthesis protein BioC OS=Escherichia coli (strain K12) GN=bioC PE=3 SV=2	bioC	4	114.01	28240.5	1	6	1	NA	4	1	13	15	10	1	5	1	0	1	0	0	1	18	NA	NA	3	10	NA
P06709	Bifunctional protein BirA OS=Escherichia coli (strain K12) GN=birA PE=1 SV=1	birA	4	150.47	35271.8	2	19	37	21	9	15	15	17	22	17	14	11	11	4	3	7	9	9	10	15	13	19	23
P12282	Sulfur carrier protein moaD adenylyltransferase OS=Escherichia coli (strain K12) GN=moeB PE=1 SV=1	moeB	4	235.78	26683.4	1	94	106	NA	65	24	58	35	43	51	65	7	33	5	7	11	37	15	NA	NA	31	55	NA
P0A8R0	Regulator of ribonuclease activity A OS=Escherichia coli (strain K12) GN=rraA PE=1 SV=1	rraA	4	250.71	17331.6	2	1559	1921	1599	977	1185	1340	1210	1508	1028	904	1006	976	1614	1413	1763	2293	2090	1591	1277	1268	1125	1262
P76422	Hydroxymethylpyrimidine/phosphomethylpyrimidine kinase OS=Escherichia coli (strain K12) GN=thiD PE=1 SV=1	thiD	4	209.42	28597.6	1	28	143	NA	11	20	15	56	25	10	12	10	8	3	3	21	24	9	NA	NA	6	21	NA
P0AC28	Uncharacterized protein ygfA OS=Escherichia coli (strain K12) GN=ygfA PE=1 SV=1	ygfA	4	222.78	21073.9	1	35	33	NA	6	16	26	11	11	11	10	6	3	3	6	7	9	9	NA	NA	6	14	NA
P25535	Protein visC OS=Escherichia coli (strain K12) GN=visC PE=3 SV=2	ubiI	4	173.75	44198.8	2	17	41	26	13	19	23	19	20	22	19	17	13	6	3	11	21	19	19	17	10	18	21
P69922	L-fucose isomerase OS=Escherichia coli (strain K12) GN=fucI PE=1 SV=1	fucI	4	225.28	64916.9	2	3	106	16	20	10	6	5	5	11	20	19	23	3	2	3	4	2	2	8	2	5	3
P0AER0	Glycerol uptake facilitator protein OS=Escherichia coli (strain K12) GN=glpF PE=1 SV=1	glpF	4	165.43	29742.6	2	46	629	2535	70	67	61	1289	82	91	124	124	117	390	236	106	154	157	125	80	77	51	77
P0A761	Putative N-acetylmannosamine-6-phosphate 2-epimerase OS=Escherichia coli (strain K12) GN=nanE PE=1 SV=1	nanE	4	154.96	24040.5	2	22	873	141	27	53	47	51	47	28	45	41	35	15	12	14	17	16	19	64	49	45	25
P05706	Glucitol/sorbitol-specific phosphotransferase enzyme IIA component OS=Escherichia coli (strain K12) GN=srlB PE=4 SV=1	srlB	4	195.45	13277.7	2	10	522	43	3	8	39	4	7	8	7	3	2	6	12	17	14	3	4	9	3	9	9
P66817	DnaA initiator-associating protein diaA OS=Escherichia coli (strain K12) GN=diaA PE=1 SV=1	diaA	4	277.33	21074.7	2	293	285	325	193	231	247	219	227	198	139	128	100	71	96	240	264	212	213	166	142	132	213
P07762	1,4-alpha-glucan-branching enzyme OS=Escherichia coli (strain K12) GN=glgB PE=1 SV=1	glgB	4	177	84265.8	2	76	105	82	66	74	74	78	82	71	60	63	60	38	51	55	126	113	93	82	70	75	87
P06720	Alpha-galactosidase OS=Escherichia coli (strain K12) GN=melA PE=1 SV=1	melA	4	126.02	50606.2	2	12	14	7	23	27	15	13	14	29	41	43	37	3	2	2	4	2	4	25	129	20	5
D0EX67	Beta-hexosaminidase 2 OS=Escherichia coli (strain K12) GN=nagZ2 PE=3 SV=1	nagZ	4	245.99	37552.9	2	131	197	138	81	93	87	104	94	80	63	51	39	44	37	128	122	123	132	86	89	97	110
P10907	sn-glycerol-3-phosphate import ATP-binding protein UgpC OS=Escherichia coli (strain K12) GN=ugpC PE=1 SV=3	ugpC	4	292.26	39480.5	2	29	31	27	26	40	21	25	21	52	76	92	123	11	15	27	21	15	17	44	31	60	21
P37388	Xylose import ATP-binding protein XylG OS=Escherichia coli (strain K12) GN=xylG PE=1 SV=1	xylG	4	168.94	56416.7	2	1	3	1	2	1	2	1	1	0	1	1	1	1	0	2	1	1	52	0	1	1	0
P32141	Uncharacterized aldolase yihT OS=Escherichia coli (strain K12) GN=yihT PE=3 SV=1	yihT	4	146.25	31944.4	1	19	16	NA	7	13	21	10	6	21	40	12	13	6	4	6	33	2	NA	NA	17	17	NA
P0AA82	Cytosine permease OS=Escherichia coli (strain K12) GN=codB PE=1 SV=1	codB	4	260.82	43603.2	2	211	31	37	58	190	191	179	159	296	143	62	39	16	20	159	199	124	201	149	89	352	344
P08179	Phosphoribosylglycinamide formyltransferase OS=Escherichia coli (strain K12) GN=purN PE=1 SV=1	purN	4	262.84	23205.8	2	459	542	484	236	290	381	290	349	229	203	157	135	196	160	559	425	477	357	263	244	271	374
P0A884	Thymidylate synthase OS=Escherichia coli (strain K12) GN=thyA PE=1 SV=1	thyA	4	170.18	30442.2	2	383	728	680	206	299	335	354	276	293	180	178	106	131	105	291	191	250	357	284	165	348	436
P37146	Ribonucleoside-diphosphate reductase 2 subunit beta OS=Escherichia coli (strain K12) GN=nrdF PE=1 SV=2	nrdF	4	170	36402.1	2	43	46	35	38	33	29	35	29	25	30	25	28	20	14	240	52	40	72	23	23	18	26
P06960	Ornithine carbamoyltransferase chain F OS=Escherichia coli (strain K12) GN=argF PE=1 SV=4	argF	4	858.07	36785.4	2	149	11	17	40	70	44	52	32	97	42	69	78	25	16	65	15	26	45	35	24	36	54
P0A6E1	Shikimate kinase 2 OS=Escherichia coli (strain K12) GN=aroL PE=1 SV=3	aroL	4	313.91	19120.8	2	680	356	263	404	418	525	358	571	446	409	282	185	94	70	436	526	481	308	320	261	418	434
P0A9I3	Glycine cleavage system transcriptional repressor OS=Escherichia coli (strain K12) GN=gcvR PE=1 SV=2	gcvR	4	190.11	20737.5	2	324	214	175	239	220	384	323	384	287	206	213	227	171	130	360	260	535	350	262	237	241	388
P13033	Anaerobic glycerol-3-phosphate dehydrogenase subunit B OS=Escherichia coli (strain K12) GN=glpB PE=1 SV=1	glpB	4	184.33	45310.4	2	4	380	360	6	6	10	258	3	8	3	5	2	5	3	13	5	12	21	10	7	16	12
P0A7C6	Peptidase E OS=Escherichia coli (strain K12) GN=pepE PE=1 SV=1	pepE	4	303.63	24537	2	140	744	462	305	300	257	195	201	181	182	144	100	15	21	37	37	23	91	207	116	214	98
P0AAD6	Serine transporter OS=Escherichia coli (strain K12) GN=sdaC PE=1 SV=1	sdaC	4	258.55	46856.9	2	66	2738	982	57	70	66	67	34	71	61	52	50	30	39	98	130	84	75	72	68	71	70
P0AGB0	Phosphoserine phosphatase OS=Escherichia coli (strain K12) GN=serB PE=1 SV=1	serB	4	201.01	35002.3	2	188	225	238	45	78	117	120	91	86	79	68	41	49	50	119	63	108	141	102	70	86	144
P0AGE4	Serine/threonine transporter sstT OS=Escherichia coli (strain K12) GN=sstT PE=1 SV=1	sstT	4	172.36	43431.4	2	58	120	134	126	94	140	93	89	382	282	281	289	54	68	111	76	142	177	70	104	144	173
P07117	Sodium/proline symporter OS=Escherichia coli (strain K12) GN=putP PE=1 SV=1	putP	4	196.34	54290.6	2	77	364	140	47	90	109	61	84	152	208	161	166	47	28	48	73	43	59	107	67	82	55
P0AAF6	Arginine transport ATP-binding protein ArtP OS=Escherichia coli (strain K12) GN=artP PE=1 SV=1	artP	4	385.47	26987	2	588	853	986	400	550	530	536	560	406	408	365	431	440	375	954	798	835	667	627	696	736	690
P0A6K1	Diaminopimelate epimerase OS=Escherichia coli (strain K12) GN=dapF PE=3 SV=1	dapF	4	123.99	30171.2	1	362	313	NA	216	257	296	235	183	251	102	153	127	30	43	225	314	315	NA	NA	160	230	NA
P0AEJ6	Ethanolamine ammonia-lyase heavy chain OS=Escherichia coli (strain K12) GN=eutB PE=1 SV=1	eutB	4	235.71	49353.6	2	32	63	54	28	32	38	40	27	34	32	36	30	33	18	60	41	24	52	41	27	34	36
P0AEQ6	Glutamine transport system permease protein glnP OS=Escherichia coli (strain K12) GN=glnP PE=1 SV=1	glnP	4	204.82	24330.5	2	34	43	63	38	70	79	59	90	134	140	100	86	23	18	9	93	31	44	70	40	66	73
P63228	D,D-heptose 1,7-bisphosphate phosphatase OS=Escherichia coli (strain K12) GN=gmhB PE=1 SV=1	gmhB	4	148.27	21262.5	2	316	297	291	273	226	291	278	250	281	248	212	171	164	178	533	270	468	357	222	247	219	318
Q47690	Homocysteine S-methyltransferase OS=Escherichia coli (strain K12) GN=mmuM PE=1 SV=2	mmuM	4	161.71	33383.9	2	151	45	30	87	77	84	89	83	68	60	67	76	61	68	144	198	138	92	93	98	62	107
P42588	Putrescine aminotransferase OS=Escherichia coli (strain K12) GN=patA PE=1 SV=2	patA	4	150.57	49611.5	2	34	32	109	35	46	34	56	23	38	31	23	16	6	6	23	13	19	43	30	26	28	34
P31134	Putrescine transport ATP-binding protein PotG OS=Escherichia coli (strain K12) GN=potG PE=3 SV=2	potG	4	152.79	41885.7	2	44	1	21	38	59	56	76	83	60	54	48	53	6	11	16	13	46	52	63	46	74	91
P37774	Uncharacterized amino-acid ABC transporter ATP-binding protein YecC OS=Escherichia coli (strain K12) GN=yecC PE=3 SV=2	yecC	4	210.78	27641.9	2	375	160	225	236	285	429	335	262	297	232	217	214	125	202	202	260	288	291	334	285	286	426
P18196	Septum site-determining protein minC OS=Escherichia coli (strain K12) GN=minC PE=1 SV=1	minC	4	167.93	24741.9	2	171	163	179	130	104	131	116	118	101	78	70	54	86	79	192	190	188	143	101	78	95	145
P77173	Cell division protein ZipA OS=Escherichia coli (strain K12) GN=zipA PE=1 SV=3	zipA	4	301.51	36434.3	2	1042	1587	1164	1237	1073	1162	1234	976	955	1125	965	962	1011	1223	1973	1521	1253	1544	1215	1239	1322	1367
P80668	Phenylacetaldehyde dehydrogenase OS=Escherichia coli (strain K12) GN=feaB PE=1 SV=2	feaB	4	172.36	53647.3	2	8	9	12	23	40	19	23	22	32	43	44	63	8	13	10	16	6	20	40	40	30	22
P09152	Respiratory nitrate reductase 1 alpha chain OS=Escherichia coli (strain K12) GN=narG PE=1 SV=4	narG	4	136.9	140383	2	0	15	0	1	1	4	1	2	1	1	1	2	0	1	1	7	3	1	2	5	5	1
P0A9T4	Protein tas OS=Escherichia coli (strain K12) GN=tas PE=1 SV=1	tas	4	222.89	38457.6	2	243	241	215	146	157	210	220	144	157	131	137	132	204	183	246	243	301	182	165	177	111	190
P10908	Glycerophosphoryl diester phosphodiesterase OS=Escherichia coli (strain K12) GN=ugpQ PE=1 SV=1	ugpQ	4	283.56	27374	2	195	181	283	200	297	219	252	196	217	234	261	247	274	245	440	302	445	296	197	198	234	199
P0AB65	Acylphosphatase OS=Escherichia coli (strain K12) GN=yccX PE=1 SV=1	yccX	4	222.45	10275.2	2	118	153	146	245	186	309	301	223	295	347	450	550	569	623	538	342	490	337	199	375	181	197
P14407	Fumarate hydratase class I, anaerobic OS=Escherichia coli (strain K12) GN=fumB PE=1 SV=2	fumB	4	1370.79	60049.4	1	15	26	NA	2	8	8	5	2	3	1	4	3	1	3	14	9	5	NA	NA	1	13	NA
P0AAJ8	Hydrogenase-2 operon protein hybA OS=Escherichia coli (strain K12) GN=hybA PE=3 SV=1	hybA	4	219.88	35961.6	1	148	34	NA	126	42	89	34	5	46	12	4	7	20	30	29	34	24	NA	NA	0	14	NA
P17117	Oxygen-insensitive NADPH nitroreductase OS=Escherichia coli (strain K12) GN=nfsA PE=1 SV=2	nfsA	4	288.74	26765.9	2	211	677	387	105	174	176	168	158	157	120	86	77	18	22	82	131	59	41	73	42	59	41
P0ADV5	Uncharacterized protein yhbW OS=Escherichia coli (strain K12) GN=yhbW PE=4 SV=1	yhbW	4	216.36	37087.7	2	110	135	155	55	61	61	98	50	44	34	39	26	24	29	35	46	90	44	49	28	37	48
P0AE28	Protein AroM OS=Escherichia coli (strain K12) GN=aroM PE=4 SV=1	aroM	4	203.58	24883.2	2	107	124	162	193	157	105	118	101	89	125	126	102	76	40	119	82	90	93	143	172	83	98
P0AET2	Protein hdeB OS=Escherichia coli (strain K12) GN=hdeB PE=1 SV=1	hdeB	4	131.11	12017	2	75	457	681	1751	371	452	100	71	311	493	567	742	7955	9087	1155	391	7006	283	86	607	150	103
P0AAX6	Uncharacterized protein McbA OS=Escherichia coli (strain K12) GN=mcbA PE=2 SV=2	mcbA	4	621.88	8872.52	1	6801	8351	NA	4783	5370	4942	4846	5157	6309	5318	7209	4928	59740	12793	5128	6705	6546	NA	NA	3402	5199	NA
P25738	Acidic protein msyB OS=Escherichia coli (strain K12) GN=msyB PE=4 SV=1	msyB	4	283.8	14232.3	2	3968	1792	3425	6405	5972	5977	6567	3546	4826	5654	7061	7290	10102	10628	7899	8645	10644	4083	6795	9672	5218	4210
P0A8K5	UPF0253 protein yaeP OS=Escherichia coli (strain K12) GN=yaeP PE=1 SV=1	yaeP	4	263.94	7191.57	2	1499	2418	1854	1312	1298	1716	1575	1369	1889	1988	1847	1748	973	654	2268	2879	2809	1567	1081	1678	847	1249
P75694	Uncharacterized protein YahO OS=Escherichia coli (strain K12) GN=yahO PE=3 SV=1	yahO	4	271.84	9871.13	2	4029	1885	3348	6852	9467	11604	7161	4115	5649	9800	12173	14454	23320	19636	9837	3706	10048	2197	7565	14990	6352	3748
P0AAN5	Uncharacterized protein yaiA OS=Escherichia coli (strain K12) GN=yaiA PE=1 SV=1	yaiA	4	166.34	7258.63	2	353	252	292	287	435	580	487	288	263	318	349	382	813	604	1166	343	934	330	568	813	441	319
P0AB14	Uncharacterized protein yccJ OS=Escherichia coli (strain K12) GN=yccJ PE=4 SV=1	yccJ	4	167.74	8501.17	2	2565	4132	2722	2016	2673	3323	2971	1770	2611	2532	2465	1956	1677	2153	2836	2830	5464	2487	1596	2210	728	1904
P0AB26	Uncharacterized lipoprotein yceB OS=Escherichia coli (strain K12) GN=yceB PE=1 SV=1	yceB	4	254.98	20468.7	2	373	567	504	252	282	287	231	310	323	346	305	259	416	476	722	408	385	409	280	176	199	198
P0ACX3	Putative monooxygenase ydhR OS=Escherichia coli (strain K12) GN=ydhR PE=1 SV=1	ydhR	4	280.56	11262.8	2	2912	2070	2170	2781	2761	3723	3139	2629	3036	2769	2739	2321	2218	1916	5182	3791	4937	3940	2960	2601	2859	2662
P0AD21	Uncharacterized protein yejG OS=Escherichia coli (strain K12) GN=yejG PE=4 SV=1	yejG	4	259.49	12499.1	1	95	167	NA	53	88	74	83	69	61	81	132	26	38	43	162	119	171	NA	NA	34	57	NA
P64540	Uncharacterized protein yfcL OS=Escherichia coli (strain K12) GN=yfcL PE=4 SV=1	yfcL	4	180.09	9975.84	2	450	892	553	208	228	230	195	177	249	194	152	130	109	91	285	261	275	269	141	142	193	225
P76549	Uncharacterized protein yffR OS=Escherichia coli (strain K12) GN=yffR PE=4 SV=1	yffR	4	288.4	14526.4	1	53	55	NA	18	47	45	54	146	51	87	17	107	345	313	117	126	67	NA	NA	20	55	NA
P45552	Uncharacterized protein yhfZ OS=Escherichia coli (strain K12) GN=yhfZ PE=4 SV=3	yhfZ	4	141.91	33465.2	1	39	47	NA	3	59	10	13	5	9	13	2	2	11	8	4	4	12	NA	NA	4	11	NA
P31433	Uncharacterized protein yicH OS=Escherichia coli (strain K12) GN=yicH PE=4 SV=2	yicH	4	266.43	62216.1	2	70	129	63	61	59	76	75	90	77	77	90	78	33	41	68	137	81	72	83	57	60	86
P0ACV8	Uncharacterized protein ymjA OS=Escherichia coli (strain K12) GN=ymjA PE=4 SV=1	ymjA	4	338.31	9297.38	2	304	175	237	314	320	261	275	342	258	249	210	184	135	170	553	284	599	334	271	341	340	303
P76073	Uncharacterized protein ynaE OS=Escherichia coli (strain K12) GN=ynaE PE=4 SV=1	ynaE	4	164.22	10084.5	1	31	9	NA	8	22	19	4	13	9	32	25	17	24	28	17	33	41	NA	NA	10	7	NA
P25552	Guanosine-5'-triphosphate,3'-diphosphate pyrophosphatase OS=Escherichia coli (strain K12) GN=gppA PE=1 SV=3	gppA	4	189.93	54818.6	2	60	42	46	21	31	44	30	39	32	32	31	20	26	10	12	34	28	25	27	31	36	39
P77454	Glutaminase 1 OS=Escherichia coli (strain K12) GN=glsA1 PE=1 SV=1	glsA	4	568.5	32864.5	2	55	47	42	353	31	45	22	17	39	28	20	37	608	677	277	207	2372	86	39	31	55	59
P50456	Protein mlc OS=Escherichia coli (strain K12) GN=mlc PE=1 SV=2	mlc	4	216.28	44270.3	2	19	55	32	21	28	50	21	26	64	97	80	68	15	14	6	15	15	7	33	19	24	16
P24205	Lipid A biosynthesis (KDO)2-(lauroyl)-lipid IVA acyltransferase OS=Escherichia coli (strain K12) GN=msbB PE=1 SV=1	msbB	4	131.64	37368.3	2	71	137	81	50	57	54	67	47	64	64	55	62	30	29	40	65	69	54	46	69	54	49
P33012	DNA gyrase inhibitory protein OS=Escherichia coli (strain K12) GN=gyrI PE=1 SV=1	gyrI	4	247.71	18051.8	1	499	785	NA	491	385	738	444	356	597	589	947	1140	1693	1509	314	469	463	NA	NA	380	282	NA
P0AB38	Penicillin-binding protein activator LpoB OS=Escherichia coli (strain K12) GN=lpoB PE=1 SV=1	lpoB	4	313.45	22483.4	2	705	843	715	524	635	862	724	568	587	469	406	343	445	637	817	890	976	540	532	440	506	588
P21420	Putative outer membrane porin protein nmpC OS=Escherichia coli (strain K12) GN=nmpC PE=5 SV=2	nmpC	4	284.13	40259.4	1	17	142	NA	11	37	16	15	10	38	32	19	25	1	1	9	4	2	NA	NA	4	38	NA
P0A8I5	tRNA (guanine-N(7)-)-methyltransferase OS=Escherichia coli (strain K12) GN=trmB PE=1 SV=1	trmB	4	173.82	27271.7	2	443	895	714	256	314	328	339	258	267	244	200	187	258	253	427	513	419	395	300	280	323	397
P24197	Uncharacterized protein ygiD OS=Escherichia coli (strain K12) GN=ygiD PE=1 SV=3	ygiD	4	158.14	28855.5	1	208	44	NA	101	93	58	72	47	34	71	5	28	104	279	89	155	232	NA	NA	43	43	NA
P00811	Beta-lactamase OS=Escherichia coli (strain K12) GN=ampC PE=1 SV=1	ampC	3	142.86	41511.4	2	19	37	37	8	13	13	11	11	10	7	6	4	0	7	15	14	11	10	7	6	9	5
P05719	Type-1 restriction enzyme EcoKI specificity protein OS=Escherichia coli (strain K12) GN=hsdS PE=1 SV=1	hsdS	3	116.55	51345.4	2	19	66	20	6	10	10	14	13	19	16	9	8	4	3	6	22	7	6	11	3	11	14
P0AD70	Penicillin-binding protein AmpH OS=Escherichia coli (strain K12) GN=ampH PE=1 SV=1	ampH	3	129.28	41804.3	1	36	53	NA	26	30	39	24	12	24	38	33	44	5	6	25	43	39	NA	NA	20	26	NA
P76008	Murein tetrapeptide carboxypeptidase OS=Escherichia coli (strain K12) GN=ldcA PE=1 SV=1	ldcA	3	298.39	33528.2	2	107	110	87	84	81	94	83	79	64	77	62	63	42	46	144	112	107	129	101	89	81	87
P0AG99	Protein-export membrane protein SecG OS=Escherichia coli (strain K12) GN=secG PE=1 SV=1	secG	3	125.69	11339.9	2	2475	4283	3777	1093	1971	2101	1989	1855	1768	1314	1183	950	1536	1284	2750	2526	2211	2044	1667	1251	1774	2325
P69423	Sec-independent protein translocase protein tatC OS=Escherichia coli (strain K12) GN=tatC PE=1 SV=2	tatC	3	161.59	28839.2	2	213	456	385	154	207	261	236	230	303	226	182	175	66	71	122	321	138	294	228	219	266	422
P0AG96	Preprotein translocase subunit SecE OS=Escherichia coli (strain K12) GN=secE PE=1 SV=1	secE	3	115.27	13616.7	2	152	291	241	82	157	186	191	132	222	154	143	103	40	37	78	160	95	151	143	74	130	195
P11071	Isocitrate dehydrogenase kinase/phosphatase OS=Escherichia coli (strain K12) GN=aceK PE=1 SV=2	aceK	3	127.21	67637.4	2	3	5	6	47	70	40	16	9	22	30	43	61	1	1	1	6	1	5	12	26	9	3
P69913	Carbon storage regulator OS=Escherichia coli (strain K12) GN=csrA PE=1 SV=1	csrA	3	163.75	6833.64	2	1907	2612	2263	1301	1029	1162	1137	1291	1012	785	729	691	1244	1055	1552	1112	1155	983	1005	650	859	1035
P76339	Putative sensor-like histidine kinase yedV OS=Escherichia coli (strain K12) GN=yedV PE=1 SV=1	yedV	3	110.16	50800.1	2	7	1	3	3	6	3	3	3	4	5	4	5	1	1	2	4	6	4	6	4	6	13
P38684	TorCAD operon transcriptional regulatory protein torR OS=Escherichia coli (strain K12) GN=torR PE=1 SV=2	torR	3	135.18	26198.8	1	1	19	NA	1	2	7	0	5	1	2	0	2	1	1	0	4	2	NA	NA	0	7	NA
P76340	Probable transcriptional regulatory protein yedW OS=Escherichia coli (strain K12) GN=yedW PE=1 SV=2	yedW	3	164.58	24984.2	1	10	1	NA	5	2	23	6	17	13	18	16	2	2	0	0	5	1	NA	NA	4	16	NA
P0AET5	Protein hdeD OS=Escherichia coli (strain K12) GN=hdeD PE=1 SV=1	hdeD	3	92.66	20871.6	2	2	1	0	29	1	4	0	2	2	2	2	4	2	43	2	8	343	4	1	2	1	2
P75779	PKHD-type hydroxylase ybiX OS=Escherichia coli (strain K12) GN=ybiX PE=3 SV=2	ybiX	3	140.4	25494.8	2	14	5	10	8	10	8	10	13	6	4	4	4	26	25	80	13	27	58	14	8	23	24
P0AAZ7	UPF0434 protein ycaR OS=Escherichia coli (strain K12) GN=ycaR PE=1 SV=1	ycaR	3	183.37	6832.52	2	1959	1498	2776	1019	1566	1768	1895	1538	1309	964	939	794	695	442	1874	2210	2083	2198	1638	1364	1874	2147
P0AD33	UPF0381 protein yfcZ OS=Escherichia coli (strain K12) GN=yfcZ PE=3 SV=1	yfcZ	3	167.61	10292.7	2	1921	3951	3438	1747	1954	2324	2059	1952	2153	1914	1568	1424	2278	2288	1818	3441	2596	1359	2445	1255	2215	2033
P0A8C4	UPF0149 protein ygfB OS=Escherichia coli (strain K12) GN=ygfB PE=3 SV=1	ygfB	3	195.24	21198.1	2	973	1302	1320	631	820	614	754	853	629	520	448	358	615	627	1489	986	1213	862	777	575	670	698
P38521	Uncharacterized protein yggL OS=Escherichia coli (strain K12) GN=yggL PE=4 SV=2	yggL	3	131.7	12854.4	2	2921	4523	3508	1781	2775	3290	2845	2518	2477	2288	2081	2155	4155	3565	6162	4539	4179	3468	3293	3547	3546	3402
P0ADT2	UPF0441 protein ygiB OS=Escherichia coli (strain K12) GN=ygiB PE=3 SV=2	ygiB	3	124.04	23446.2	2	127	210	215	107	176	136	155	121	201	152	126	161	53	30	278	142	279	194	111	114	93	96
P64624	Uncharacterized protein yheO OS=Escherichia coli (strain K12) GN=yheO PE=4 SV=1	yheO	3	164.49	26785.6	2	523	694	557	516	393	433	463	416	485	470	408	351	110	180	277	623	564	460	448	304	263	322
P09996	Uncharacterized protein yidB OS=Escherichia coli (strain K12) GN=yidB PE=4 SV=1	yidB	3	147.44	13760.1	2	511	605	714	443	521	567	652	667	524	494	343	582	456	615	1015	844	690	609	615	776	492	577
P0ADP7	Uncharacterized protein yigP OS=Escherichia coli (strain K12) GN=yigP PE=1 SV=1	yigP	3	249.12	22120.8	2	41	106	62	39	30	31	32	40	71	64	66	67	1	3	11	19	8	20	34	19	21	30
P0AAP3	Transcriptional repressor frmR OS=Escherichia coli (strain K12) GN=frmR PE=1 SV=1	frmR	3	208.78	10293.3	2	365	554	369	193	332	345	373	265	251	206	187	189	224	200	440	451	549	310	276	245	279	287
P0C0L9	Protein iscX OS=Escherichia coli (strain K12) GN=iscX PE=1 SV=1	iscX	3	233.32	7708.63	1	2607	4557	NA	1633	1556	2453	1476	1399	1798	1607	1723	1247	2590	2151	2069	2163	2300	NA	NA	1331	1579	NA
P22186	Protein MraZ OS=Escherichia coli (strain K12) GN=mraZ PE=3 SV=1	mraZ	3	175.13	17356.9	2	148	85	109	154	148	125	136	162	136	105	98	112	208	66	135	171	180	154	99	158	95	118
P0A8I8	Ribosomal RNA large subunit methyltransferase H OS=Escherichia coli (strain K12) GN=rlmH PE=1 SV=1	rlmH	3	149.44	17312.1	2	56	129	95	23	38	35	33	30	24	19	15	9	13	23	57	18	44	32	28	16	28	32
P0AGL7	Ribosomal RNA small subunit methyltransferase E OS=Escherichia coli (strain K12) GN=rsmE PE=1 SV=1	rsmE	3	195.07	26943	2	136	142	207	75	106	124	141	116	83	66	63	51	93	45	123	143	136	163	78	118	127	143
P32162	UPF0381 protein yiiS OS=Escherichia coli (strain K12) GN=yiiS PE=1 SV=1	yiiS	3	198.41	10751.2	2	342	411	273	393	313	567	427	222	358	285	271	303	1964	1892	774	1092	1033	390	332	377	275	317
P67338	UPF0181 protein yoaH OS=Escherichia coli (strain K12) GN=yoaH PE=3 SV=1	yoaH	3	188.95	6532.2	1	84	57	NA	62	101	69	89	47	72	77	290	39	67	79	54	72	174	NA	NA	33	68	NA
P52119	UPF0125 protein yfjF OS=Escherichia coli (strain K12) GN=yfjF PE=1 SV=1	ratB	3	115.34	10764.8	2	127	136	87	84	84	73	89	73	84	60	65	57	40	30	110	135	86	116	77	74	112	152
P39451	Alcohol dehydrogenase, propanol-preferring OS=Escherichia coli (strain K12) GN=adhP PE=1 SV=1	adhP	3	148.59	35339.1	2	26	48	32	70	26	22	26	29	28	26	35	25	4	5	24	10	22	13	20	7	9	14
P0ABN5	Anaerobic C4-dicarboxylate transporter dcuA OS=Escherichia coli (strain K12) GN=dcuA PE=1 SV=1	dcuA	3	195.73	45702.8	2	199	787	504	170	227	264	253	279	482	443	399	410	80	82	93	221	116	224	204	137	150	286
P06616	GTPase Era OS=Escherichia coli (strain K12) GN=era PE=1 SV=2	era	3	129.02	33770.8	2	45	104	54	21	39	38	36	37	35	29	21	19	18	17	38	88	73	83	60	45	69	76
P39364	Putative sgc region protein SgcQ OS=Escherichia coli (strain K12) GN=sgcQ PE=1 SV=1	sgcQ	3	137.86	29317.8	2	1	1	0	0	0	7	0	1	0	0	0	33	12	4	4	1	0	1	2	1	1	1
P75792	Sugar phosphatase SupH OS=Escherichia coli (strain K12) GN=supH PE=1 SV=1	ybiV	3	132.69	30375.6	2	135	95	81	66	53	59	76	77	74	33	32	29	51	44	229	170	183	152	76	65	81	124
P33018	S-formylglutathione hydrolase yeiG OS=Escherichia coli (strain K12) GN=yeiG PE=1 SV=1	yeiG	3	138.9	31221.1	2	129	90	145	150	157	168	167	136	235	193	143	119	105	75	201	101	134	129	180	138	170	154
P77808	CinA-like protein OS=Escherichia coli (strain K12) GN=yfaY PE=1 SV=1	yfaY	3	251.12	44179.5	2	128	184	113	72	66	126	91	78	105	94	100	98	56	56	85	83	118	125	86	83	71	124
P0ADM4	Uncharacterized protein yidQ OS=Escherichia coli (strain K12) GN=yidQ PE=4 SV=1	yidQ	3	136.26	11799.8	2	489	492	658	242	330	282	279	314	226	231	226	281	181	226	316	289	299	237	292	260	245	263
P0AEW4	Protein icc OS=Escherichia coli (strain K12) GN=icc PE=4 SV=1	cpdA	3	179.71	30900.6	2	170	201	216	171	198	258	214	213	171	168	206	271	288	212	290	225	264	245	209	238	196	219
P51025	S-formylglutathione hydrolase frmB OS=Escherichia coli (strain K12) GN=frmB PE=1 SV=2	frmB	3	221.83	31386.3	1	52	234	NA	40	26	44	44	10	17	10	7	12	15	7	56	60	54	NA	NA	18	32	NA
P75796	Glutathione import ATP-binding protein GsiA OS=Escherichia coli (strain K12) GN=gsiA PE=1 SV=3	gsiA	3	134.22	69052.4	2	7	2	8	9	7	12	5	6	14	11	10	8	7	12	9	19	29	13	10	7	9	13
P0ABZ4	3-deoxy-D-manno-octulosonate 8-phosphate phosphatase OS=Escherichia coli (strain K12) GN=kdsC PE=1 SV=1	kdsC	3	140.43	19966.5	2	203	375	341	177	178	159	190	168	212	149	158	123	151	161	345	206	309	331	176	278	275	267
P0AF98	Lipopolysaccharide export system permease protein lptF OS=Escherichia coli (strain K12) GN=lptF PE=1 SV=1	lptF	3	281.81	40313.6	2	73	129	106	65	78	97	79	70	125	115	113	114	23	57	72	91	73	97	75	88	72	106
P0ADC6	Lipopolysaccharide export system permease protein lptG OS=Escherichia coli (strain K12) GN=lptG PE=1 SV=1	lptG	3	127.38	39574.8	2	89	158	111	43	64	77	70	94	108	99	86	92	37	35	45	88	55	129	121	97	99	138
P64602	Probable phospholipid ABC transporter-binding protein mlaB OS=Escherichia coli (strain K12) GN=mlaB PE=1 SV=1	mlaB	3	153.21	10655.6	2	621	1126	1079	340	422	471	600	519	702	455	430	318	234	235	495	558	485	571	524	398	496	826
P77181	Phenylacetic acid degradation protein paaY OS=Escherichia coli (strain K12) GN=paaY PE=3 SV=1	paaY	3	123.93	21293.1	2	7	13	19	13	20	16	11	10	12	16	15	22	4	6	17	18	12	14	23	31	26	16
P16692	Protein phnP OS=Escherichia coli (strain K12) GN=phnP PE=1 SV=1	phnP	3	142.9	27811.8	1	51	6	NA	8	28	12	9	2	5	19	11	7	3	10	1	2	13	NA	NA	17	10	NA
P0AAC4	Inner membrane protein YbhL OS=Escherichia coli (strain K12) GN=ybhL PE=1 SV=1	ybhL	3	132.68	25866.7	2	65	104	77	41	69	101	68	47	77	62	63	86	113	59	120	113	149	87	60	57	53	72
P43340	Uncharacterized NAD(P)H oxidoreductase ycaK OS=Escherichia coli (strain K12) GN=ycaK PE=3 SV=2	ycaK	3	104.44	23003.3	1	45	16	NA	10	36	24	28	0	4	0	0	0	0	1	9	2	2	NA	NA	6	2	NA
P76389	UPF0053 protein yegH OS=Escherichia coli (strain K12) GN=yegH PE=3 SV=2	yegH	3	105.87	59394.4	2	22	26	23	12	17	23	18	21	16	12	11	9	27	20	73	15	16	39	15	8	11	19
P31466	Probable adenine permease PurP OS=Escherichia coli (strain K12) GN=purP PE=1 SV=2	adeP	3	261.74	46816.9	2	91	43	60	66	77	84	77	121	117	103	70	79	36	23	72	63	72	46	61	32	56	93
P45524	Putative esterase YheT OS=Escherichia coli (strain K12) GN=yheT PE=3 SV=1	yheT	3	67	38452.3	1	18	38	NA	3	6	16	8	3	4	2	0	0	1	3	8	15	3	NA	NA	2	5	NA
P31467	Phosphatase YieH OS=Escherichia coli (strain K12) GN=yieH PE=3 SV=1	yieH	3	62.65	24630.2	1	21	22	NA	4	1	13	7	7	13	7	0	2	1	1	24	33	24	NA	NA	2	12	NA
P64636	Uncharacterized protein yrfG OS=Escherichia coli (strain K12) GN=yrfG PE=4 SV=1	yrfG	3	178.51	25364.6	1	62	148	NA	15	73	67	43	28	25	113	11	16	12	19	18	34	17	NA	NA	20	35	NA
P26648	Protein SufI OS=Escherichia coli (strain K12) GN=sufI PE=1 SV=2	ftsP	3	179.28	51807.5	2	36	49	52	17	26	23	25	25	20	14	16	14	17	23	39	47	53	40	29	54	42	59
P63386	Probable phospholipid import ATP-binding protein MlaF OS=Escherichia coli (strain K12) GN=mlaF PE=1 SV=1	mlaF	3	164.35	29060.1	2	69	89	64	37	41	34	53	57	41	38	29	29	20	16	29	76	27	37	21	41	44	36
P33025	Pseudouridine-5'-phosphate glycosidase OS=Escherichia coli (strain K12) GN=psuG PE=1 SV=1	psuG	3	125.27	32871.4	2	7	87	98	27	62	67	41	29	61	137	139	68	17	4	44	5	6	4	62	45	73	32
P77504	Uncharacterized ABC transporter permease ybbP OS=Escherichia coli (strain K12) GN=ybbP PE=3 SV=1	ybbP	3	128.56	89256.8	2	11	19	6	14	16	14	18	27	15	20	19	16	4	5	6	6	4	6	9	8	3	9
P33941	ABC transporter ATP-binding protein YojI OS=Escherichia coli (strain K12) GN=yojI PE=1 SV=2	yojI	3	178.3	61495.8	2	2	5	3	3	6	5	3	7	3	3	2	2	2	2	6	17	7	9	5	3	4	13
P13036	Fe(3+) dicitrate transport protein fecA OS=Escherichia coli (strain K12) GN=fecA PE=1 SV=2	fecA	3	142.93	85251	2	2	4	1	4	2	2	2	4	1	2	1	1	10	10	12	14	15	6	5	3	4	1
P23857	Thiosulfate sulfurtransferase PspE OS=Escherichia coli (strain K12) GN=pspE PE=1 SV=1	pspE	3	212.25	11450	2	116	1550	1500	352	445	233	285	437	282	271	119	102	79	68	137	38	112	123	486	107	338	156
P0AEL6	Ferrienterobactin-binding periplasmic protein OS=Escherichia coli (strain K12) GN=fepB PE=1 SV=1	fepB	3	181.53	34244	2	77	34	79	70	62	63	69	87	68	45	39	36	142	107	178	78	95	79	44	31	47	60
P07822	Iron(3+)-hydroxamate-binding protein fhuD OS=Escherichia coli (strain K12) GN=fhuD PE=1 SV=3	fhuD	3	126.51	32959	1	46	40	NA	21	47	49	30	32	44	61	2	26	14	18	22	63	74	NA	NA	14	47	NA
P31069	Putative potassium channel protein OS=Escherichia coli (strain K12) GN=kch PE=1 SV=1	kch	3	118.15	46015.2	2	55	77	104	37	37	45	48	30	38	36	23	15	73	54	153	121	247	120	66	47	68	72
P03819	Glutathione-regulated potassium-efflux system protein kefC OS=Escherichia coli (strain K12) GN=kefC PE=1 SV=2	kefC	3	140.33	67734.1	2	2	4	3	4	5	8	4	3	11	10	9	10	1	1	1	3	3	1	4	2	4	3
Q47537	Taurine-binding periplasmic protein OS=Escherichia coli (strain K12) GN=tauA PE=1 SV=1	tauA	3	123.61	34227.1	2	5	2	6	3	4	5	6	7	5	3	4	5	2	1	4	10	244	5	3	3	4	7
P24178	Protein YffB OS=Escherichia coli (strain K12) GN=yffB PE=1 SV=1	yffB	3	113.06	13573.9	2	13	143	29	13	5	1	6	3	19	11	12	10	45	65	39	23	64	6	15	2	31	23
P76569	Uncharacterized protein YfgD OS=Escherichia coli (strain K12) GN=yfgD PE=1 SV=1	yfgD	3	265.62	13372.1	2	2244	2634	2622	1065	1177	1498	1649	1779	1241	956	703	628	330	373	2807	2567	1644	2255	1683	1171	1515	2258
P76115	Probable tonB-dependent receptor yncD OS=Escherichia coli (strain K12) GN=yncD PE=3 SV=1	yncD	3	130.74	77194.7	2	6	41	4	2	2	2	2	2	4	4	1	3	3	3	1	2	4	2	5	3	6	2
P0A9X1	Zinc import ATP-binding protein ZnuC OS=Escherichia coli (strain K12) GN=znuC PE=1 SV=1	znuC	3	99.27	27832	1	22	58	NA	8	5	173	6	2	6	4	1	18	10	36	9	11	17	NA	NA	6	5	NA
P55734	Inner membrane protein ygaP OS=Escherichia coli (strain K12) GN=ygaP PE=1 SV=1	ygaP	3	96.5	18608.9	2	482	1128	652	332	495	378	450	503	431	439	398	468	190	197	367	369	295	495	655	616	596	758
P0AF43	Uncharacterized protein yjbB OS=Escherichia coli (strain K12) GN=yjbB PE=4 SV=1	yjbB	3	105.28	59411	2	3	5	4	1	4	3	4	1	9	5	6	12	1	0	1	5	0	1	1	0	2	1
P78067	Thiosulfate sulfurtransferase YnjE OS=Escherichia coli (strain K12) GN=ynjE PE=1 SV=2	ynjE	3	164.84	48180.1	2	17	14	43	40	45	41	25	29	32	36	29	30	11	8	4	5	15	14	46	41	41	23
P0A9I8	Nitrite reductase [NAD(P)H] small subunit OS=Escherichia coli (strain K12) GN=nirD PE=1 SV=1	nirD	3	103.65	12258.2	2	10	29	13	5	1	3	4	5	7	3	5	3	0	3	5	12	4	9	2	5	9	2
P24193	Hydrogenase isoenzymes formation protein hypE OS=Escherichia coli (strain K12) GN=hypE PE=1 SV=2	hypE	3	228.42	35052.3	2	16	18	13	8	23	9	12	10	9	7	11	16	11	8	19	27	24	22	21	22	16	14
P36928	Uncharacterized chaperone protein yegD OS=Escherichia coli (strain K12) GN=yegD PE=3 SV=2	yegD	3	187.49	49322.4	2	22	48	25	7	6	14	5	3	7	3	3	2	0	1	9	2	3	7	3	3	3	7
P0A7B8	ATP-dependent protease subunit HslV OS=Escherichia coli (strain K12) GN=hslV PE=1 SV=2	hslV	3	241.88	19063	2	467	1667	909	293	394	517	396	344	316	336	228	227	508	463	564	1022	644	519	447	337	418	499
P0ABZ1	Flagellar motor switch protein FliG OS=Escherichia coli (strain K12) GN=fliG PE=1 SV=1	fliG	3	161.34	36735.2	2	6	5	47	1	17	13	11	2	17	28	8	2	5	6	2	9	2	4	12	3	10	4
P0ADN6	Uncharacterized lipoprotein yifL OS=Escherichia coli (strain K12) GN=yifL PE=4 SV=1	yifL	3	176.06	7154.69	2	2754	3722	3623	1808	2547	2558	2686	2986	2199	1892	1538	1413	2491	2577	3674	3829	3481	3125	2495	1855	2393	2929
P0A964	Chemotaxis protein CheW OS=Escherichia coli (strain K12) GN=cheW PE=1 SV=1	cheW	3	157.81	18054.5	2	5	19	22	1	11	49	7	2	44	163	33	1	1	0	2	4	2	3	6	4	4	5
P02942	Methyl-accepting chemotaxis protein I OS=Escherichia coli (strain K12) GN=tsr PE=1 SV=2	tsr	3	185.27	59388.3	2	0	1	1	0	0	1	0	0	13	31	5	0	0	0	0	0	0	0	0	0	1	1
P75937	Flagellar hook protein flgE OS=Escherichia coli (strain K12) GN=flgE PE=1 SV=3	flgE	3	281.17	42001.5	1	40	52	NA	3	63	37	39	20	22	22	5	4	11	1	2	6	2	NA	NA	10	55	NA
P06974	Flagellar motor switch protein FliM OS=Escherichia coli (strain K12) GN=fliM PE=1 SV=1	fliM	3	100.52	37807.8	1	1	24	NA	0	12	5	7	0	2	1	3	0	0	0	3	1	1	NA	NA	0	4	NA
P36548	N-acetylmuramoyl-L-alanine amidase AmiA OS=Escherichia coli (strain K12) GN=amiA PE=1 SV=1	amiA	3	205.9	31374.9	2	76	107	90	17	57	41	80	75	64	68	43	46	44	4	47	155	40	79	81	37	72	105
P0A901	Outer membrane lipoprotein blc OS=Escherichia coli (strain K12) GN=blc PE=1 SV=1	blc	3	115.34	19821.1	2	50	194	173	83	80	86	71	48	69	73	66	67	126	108	104	65	109	53	76	77	64	51
P21645	UDP-3-O-[3-hydroxymyristoyl] glucosamine N-acyltransferase OS=Escherichia coli (strain K12) GN=lpxD PE=1 SV=2	lpxD	3	96.85	35997.4	2	85	157	115	48	86	91	95	72	86	69	60	62	113	59	99	73	96	49	63	43	70	58
P0A935	Membrane-bound lytic murein transglycosylase A OS=Escherichia coli (strain K12) GN=mltA PE=1 SV=1	mltA	3	110.56	40367.1	2	24	38	24	13	15	14	16	18	14	10	8	6	10	5	43	37	19	50	38	27	33	27
P08373	UDP-N-acetylenolpyruvoylglucosamine reductase OS=Escherichia coli (strain K12) GN=murB PE=1 SV=1	murB	3	138.01	37809.3	2	55	88	36	18	38	43	38	42	29	23	21	14	10	6	39	10	42	30	22	20	24	35
P14900	UDP-N-acetylmuramoylalanine--D-glutamate ligase OS=Escherichia coli (strain K12) GN=murD PE=1 SV=3	murD	3	189.63	46925.8	2	81	115	102	69	69	96	69	82	52	35	28	26	27	17	48	52	182	58	61	48	61	73
P0A921	Phospholipase A1 OS=Escherichia coli (strain K12) GN=pldA PE=1 SV=1	pldA	3	128.59	33124.2	2	21	37	33	15	14	18	18	14	16	15	14	12	17	17	18	19	22	24	21	18	15	22
P77690	UDP-4-amino-4-deoxy-L-arabinose--oxoglutarate aminotransferase OS=Escherichia coli (strain K12) GN=arnB PE=1 SV=2	arnB	3	100.19	41605.5	2	15	13	10	13	19	14	18	12	11	12	10	11	5	5	10	15	8	9	13	10	9	10
P02919-2	Isoform Gamma of Penicillin-binding protein 1B OS=Escherichia coli (strain K12) GN=mrcB	mrcB	3	327.03	88815.9	1	60	11	NA	35	2	67	18	193	11	7	5	2	14	6	20	39	22	NA	NA	14	11	NA
P37745	dTDP-4-dehydrorhamnose 3,5-epimerase OS=Escherichia coli (strain K12) GN=rfbC PE=1 SV=1	rfbC	3	115.82	21238.8	2	252	635	467	183	258	197	222	173	184	165	139	118	84	54	199	182	209	262	234	186	259	287
P27833	Lipopolysaccharide biosynthesis protein rffA OS=Escherichia coli (strain K12) GN=rffA PE=3 SV=2	rffA	3	127.68	41856.1	2	79	151	109	40	59	66	58	67	44	37	26	28	28	15	35	85	45	55	46	46	53	63
P0AC75	3-deoxy-D-manno-octulosonic-acid transferase OS=Escherichia coli (strain K12) GN=waaA PE=3 SV=1	waaA	3	114.5	47243.5	2	31	54	48	19	27	35	37	32	58	34	28	23	11	10	10	45	11	14	15	13	26	28
P40710	Lipoprotein NlpE OS=Escherichia coli (strain K12) GN=nlpE PE=1 SV=1	nlpE	3	105.32	25809.5	2	7	20	21	11	12	21	10	8	51	33	44	52	47	40	74	14	21	12	13	20	14	12
P0AED9	DNA-cytosine methyltransferase OS=Escherichia coli (strain K12) GN=dcm PE=1 SV=1	dcm	3	196.12	53413.3	2	20	30	19	13	15	17	17	17	17	16	14	10	4	7	16	14	11	18	16	10	14	12
P0ABS5	DNA primase OS=Escherichia coli (strain K12) GN=dnaG PE=1 SV=1	dnaG	3	120.21	65505.3	2	6	14	8	4	9	9	10	10	16	15	15	16	5	5	6	10	9	10	19	14	16	10
P0A7H6	Recombination protein recR OS=Escherichia coli (strain K12) GN=recR PE=3 SV=1	recR	3	270.1	21930.9	2	76	257	186	45	42	69	58	51	60	29	24	13	23	30	73	49	66	43	53	38	64	65
P09980	ATP-dependent DNA helicase rep OS=Escherichia coli (strain K12) GN=rep PE=1 SV=3	rep	3	79.31	76957.6	2	7	11	10	4	4	7	6	6	12	11	9	7	1	1	4	10	7	6	4	3	4	8
P0AEF0	DNA replication protein dnaC OS=Escherichia coli (strain K12) GN=dnaC PE=1 SV=1	dnaC	3	128.08	27899.1	1	59	66	NA	43	38	54	34	31	49	32	23	23	9	3	55	61	55	NA	NA	31	31	NA
P10443	DNA polymerase III subunit alpha OS=Escherichia coli (strain K12) GN=dnaE PE=1 SV=1	dnaE	3	107.96	129804	2	3	28	4	4	5	7	4	5	6	6	6	6	5	4	6	7	4	6	6	8	5	7
P06710	DNA polymerase III subunit tau OS=Escherichia coli (strain K12) GN=dnaX PE=1 SV=1	dnaX	3	175.39	71075.4	2	10	19	7	7	9	7	11	12	12	9	9	7	5	6	10	22	15	20	15	13	14	20
P0AEK0	Exodeoxyribonuclease 10 OS=Escherichia coli (strain K12) GN=exoX PE=1 SV=1	exoX	3	105.13	25098.7	1	17	40	NA	19	47	21	10	2	7	47	9	6	7	2	10	9	15	NA	NA	5	14	NA
P69931	DnaA-homolog protein hda OS=Escherichia coli (strain K12) GN=hda PE=1 SV=2	hda	3	154.31	26597.9	1	11	7	NA	5	22	16	12	15	1	18	15	4	4	7	7	29	2	NA	NA	7	14	NA
P0CF40	Transposase insC for insertion element IS2A OS=Escherichia coli (strain K12) GN=insC1 PE=3 SV=1	insC	3	82.2	13425.2	1	34	30	NA	17	16	36	13	29	11	30	18	3	3	3	25	15	23	NA	NA	9	20	NA
P0A8I1	Putative Holliday junction resolvase OS=Escherichia coli (strain K12) GN=yqgF PE=1 SV=1	yqgF	3	113.49	15158.9	2	70	136	92	40	63	70	62	56	70	63	29	29	120	27	102	108	69	74	57	51	56	72
P0A809	Holliday junction ATP-dependent DNA helicase ruvA OS=Escherichia coli (strain K12) GN=ruvA PE=1 SV=1	ruvA	3	283.67	22053.7	1	101	252	NA	116	73	262	182	165	264	212	52	71	5	4	349	205	167	NA	NA	86	195	NA
P27859	Deoxyribonuclease tatD OS=Escherichia coli (strain K12) GN=tatD PE=1 SV=3	tatD	3	62.45	28937.5	1	10	25	NA	8	23	13	11	13	6	21	18	4	2	1	3	10	2	NA	NA	6	9	NA
P39408	Uncharacterized deoxyribonuclease yjjV OS=Escherichia coli (strain K12) GN=yjjV PE=1 SV=2	yjjV	3	181.99	28873	2	21	21	31	13	11	14	14	8	7	6	8	8	24	23	46	21	34	19	13	15	7	7
P21693	ATP-independent RNA helicase dbpA OS=Escherichia coli (strain K12) GN=dbpA PE=1 SV=2	dbpA	3	100.73	49138.8	1	10	28	NA	1	2	1	3	1	1	0	2	0	0	1	3	12	8	NA	NA	0	3	NA
P0A776	RNA pyrophosphohydrolase OS=Escherichia coli (strain K12) GN=rppH PE=1 SV=1	rppH	3	205.69	20763.6	1	53	9	NA	20	76	35	33	14	38	5	16	14	13	15	51	25	103	NA	NA	18	29	NA
P0A9X9	Cold shock protein CspA OS=Escherichia coli (strain K12) GN=cspA PE=1 SV=2	cspA	3	212.28	7380.62	2	2375	7444	1628	683	1445	1142	880	856	646	448	340	296	462	454	1609	1347	1013	1446	919	710	997	1195
P0AFW4	Regulator of nucleoside diphosphate kinase OS=Escherichia coli (strain K12) GN=rnk PE=1 SV=1	rnk	3	312.3	14899.5	2	435	1521	1171	981	718	822	572	489	505	486	318	215	73	74	113	112	62	352	551	355	579	414
P0A881	Trp operon repressor OS=Escherichia coli (strain K12) GN=trpR PE=1 SV=2	trpR	3	80.36	12329.4	2	167	135	81	123	228	209	163	172	162	151	153	141	121	134	218	199	206	135	161	144	164	138
P77171	Uncharacterized HTH-type transcriptional regulator ydcI OS=Escherichia coli (strain K12) GN=ydcI PE=4 SV=2	ydcI	3	212.55	33362.6	2	133	267	345	240	266	245	142	249	266	271	194	174	6	5	83	51	81	168	240	117	225	160
P64588	Uncharacterized protein yqjI OS=Escherichia coli (strain K12) GN=yqjI PE=4 SV=1	yqjI	3	171.48	23368.6	2	85	140	97	51	55	67	64	53	69	49	39	33	28	30	115	121	60	101	64	40	55	75
P76034	Uncharacterized HTH-type transcriptional regulator yciT OS=Escherichia coli (strain K12) GN=yciT PE=4 SV=1	yciT	3	307.22	27567.2	2	82	104	65	73	79	105	78	92	73	84	71	68	98	51	121	171	136	103	87	77	81	99
P0ACI6	Regulatory protein AsnC OS=Escherichia coli (strain K12) GN=asnC PE=1 SV=1	asnC	3	216.33	16858.9	1	114	116	NA	35	14	74	52	44	53	72	51	12	13	18	65	55	42	NA	NA	32	58	NA
P31460	Galactonate operon transcriptional repressor OS=Escherichia coli (strain K12) GN=dgoR PE=4 SV=4	dgoR	3	206.94	26045.3	2	42	51	44	53	57	46	39	65	81	80	75	69	12	5	23	19	20	14	27	28	23	19
P76141	Transcriptional regulator lsrR OS=Escherichia coli (strain K12) GN=lsrR PE=1 SV=1	lsrR	3	104.89	33757.6	1	45	15	NA	21	20	13	8	15	13	41	4	10	2	3	6	10	5	NA	NA	8	13	NA
P0C093	HTH-type protein slmA OS=Escherichia coli (strain K12) GN=slmA PE=1 SV=1	slmA	3	135.03	22804.1	2	152	233	245	69	94	144	98	135	94	81	78	51	108	74	210	239	151	112	112	99	111	94
P77626	Uncharacterized HTH-type transcriptional regulator ydcN OS=Escherichia coli (strain K12) GN=ydcN PE=4 SV=1	ydcN	3	73.83	19700.8	1	15	9	NA	8	26	14	8	6	12	19	1	2	2	0	5	4	8	NA	NA	7	15	NA
P37767	Uncharacterized HTH-type transcriptional regulator yfhH OS=Escherichia coli (strain K12) GN=yfhH PE=4 SV=2	yfhH	3	301.51	30670.3	1	44	66	NA	29	46	48	11	13	23	29	35	5	4	3	8	89	33	NA	NA	20	36	NA
P0ACN2	Uncharacterized HTH-type transcriptional regulator ytfH OS=Escherichia coli (strain K12) GN=ytfH PE=4 SV=1	ytfH	3	136.19	14048.4	1	20	62	NA	19	29	11	18	2	37	0	25	10	13	26	17	20	31	NA	NA	7	14	NA
P0AEF4	Transcriptional regulatory protein DpiA OS=Escherichia coli (strain K12) GN=dpiA PE=1 SV=1	dpiA	3	116.89	25419.2	1	8	1	NA	4	8	6	2	1	7	1	4	3	2	2	1	5	16	NA	NA	3	2	NA
P15373	Antitoxin PrlF OS=Escherichia coli (strain K12) GN=sohA PE=1 SV=1	prlF	3	151.31	12333.2	2	70	91	76	48	74	78	78	58	78	57	56	51	80	80	182	203	166	113	86	94	84	88
P0A7T7	30S ribosomal protein S18 OS=Escherichia coli (strain K12) GN=rpsR PE=1 SV=2	rpsR	3	155.84	8962.84	2	25416	71308	39115	11889	18526	20312	22425	15930	20666	14150	10995	8701	12133	8463	18544	24732	19834	24755	18071	14999	20519	29526
P23003	tRNA (uracil-5-)-methyltransferase OS=Escherichia coli (strain K12) GN=trmA PE=1 SV=1	trmA	3	240.6	41922.2	2	86	141	88	48	58	49	61	61	56	51	37	28	39	28	54	81	58	72	55	31	50	74
P0A948	Ribosomal-protein-alanine acetyltransferase OS=Escherichia coli (strain K12) GN=rimJ PE=1 SV=1	rimJ	3	149.82	22655.3	1	172	184	NA	92	90	133	97	81	126	78	87	82	24	38	153	136	182	NA	NA	59	85	NA
P13857	Ribosomal-protein-serine acetyltransferase OS=Escherichia coli (strain K12) GN=rimL PE=1 SV=1	rimL	3	130.15	20649.5	2	74	65	31	114	121	95	97	92	107	122	114	131	32	32	80	71	78	55	116	95	104	62
P0C0R7	Ribosomal RNA large subunit methyltransferase E OS=Escherichia coli (strain K12) GN=rlmE PE=1 SV=1	rlmE	3	141.13	23302.1	2	216	416	313	143	179	187	211	161	161	124	111	99	138	146	201	264	225	232	177	133	185	244
P0AE01	tRNA (cytidine/uridine-2'-O-)-methyltransferase TrmJ OS=Escherichia coli (strain K12) GN=trmJ PE=1 SV=1	trmJ	3	192.36	27012.9	2	258	423	231	132	139	147	136	174	136	111	77	69	107	82	143	223	243	169	144	103	151	229
P0AA41	tRNA pseudouridine synthase C OS=Escherichia coli (strain K12) GN=truC PE=1 SV=1	truC	3	127.55	29629.2	1	50	88	NA	9	41	25	25	15	21	20	2	7	7	23	28	22	9	NA	NA	16	44	NA
P26647	1-acyl-sn-glycerol-3-phosphate acyltransferase OS=Escherichia coli (strain K12) GN=plsC PE=1 SV=1	plsC	3	120.25	27417.5	2	43	140	87	25	26	58	40	46	85	70	51	38	37	16	35	46	42	65	37	30	29	67
P64599	Uncharacterized protein yhbT OS=Escherichia coli (strain K12) GN=yhbT PE=1 SV=1	yhbT	3	124.6	19641.3	1	6	75	NA	3	6	17	33	1	3	0	7	2	1	2	2	9	3	NA	NA	12	5	NA
P05707	Sorbitol-6-phosphate 2-dehydrogenase OS=Escherichia coli (strain K12) GN=srlD PE=1 SV=2	srlD	3	161.66	27822.1	1	4	358	NA	1	1	6	2	1	2	3	0	1	36	22	3	4	6	NA	NA	1	2	NA
P52037	Uncharacterized oxidoreductase ygfF OS=Escherichia coli (strain K12) GN=ygfF PE=1 SV=2	ygfF	3	166.72	25904.2	1	18	17	NA	11	5	8	12	4	11	3	10	3	7	0	26	3	26	NA	NA	4	9	NA
P0A6I9	Dephospho-CoA kinase OS=Escherichia coli (strain K12) GN=coaE PE=1 SV=1	coaE	3	157.14	22589.9	2	71	63	125	64	59	46	41	64	55	48	44	47	49	74	92	56	80	53	41	34	35	48
P36562	Nicotinate-nucleotide--dimethylbenzimidazole phosphoribosyltransferase OS=Escherichia coli (strain K12) GN=cobT PE=3 SV=3	cobT	3	121.29	36945.2	2	83	69	91	62	64	64	79	77	62	60	35	31	6	15	41	47	48	59	43	21	33	39
P32099	Lipoate-protein ligase A OS=Escherichia coli (strain K12) GN=lplA PE=1 SV=3	lplA	3	220.14	37884.1	2	62	149	130	47	66	92	74	75	66	56	40	31	31	29	100	65	49	92	66	65	81	77
P29208	o-succinylbenzoate synthase OS=Escherichia coli (strain K12) GN=menC PE=1 SV=2	menC	3	152.96	35436.3	2	17	76	35	7	10	11	9	11	7	5	3	4	2	4	17	3	18	8	8	5	7	13
P0A790	Aspartate 1-decarboxylase OS=Escherichia coli (strain K12) GN=panD PE=1 SV=1	panD	3	167.52	13806.9	2	665	542	619	268	369	394	383	433	307	231	151	93	91	114	433	761	572	466	272	208	307	479
P77150	Pyridoxamine kinase OS=Escherichia coli (strain K12) GN=pdxY PE=1 SV=3	pdxY	3	89.34	31284.1	2	85	289	277	53	42	93	36	38	44	23	8	6	13	11	232	84	242	116	24	11	60	66
P0AG03	3-octaprenyl-4-hydroxybenzoate carboxy-lyase OS=Escherichia coli (strain K12) GN=ubiX PE=3 SV=1	ubiX	3	104.98	20664	2	63	64	43	27	52	41	50	52	41	52	55	45	33	23	12	78	24	31	40	22	32	67
P75728	2-octaprenyl-3-methyl-6-methoxy-1,4-benzoquinol hydroxylase OS=Escherichia coli (strain K12) GN=ubiF PE=1 SV=1	ubiF	3	105.78	42908	2	31	46	35	24	28	39	26	19	43	32	34	38	8	15	14	36	40	28	28	29	29	30
P76291	tRNA (mo5U34)-methyltransferase OS=Escherichia coli (strain K12) GN=cmoB PE=3 SV=1	cmoB	3	263.65	36965.1	2	125	393	211	59	70	112	100	65	86	61	58	65	44	41	47	130	68	95	79	52	102	112
P0AEA8	Siroheme synthase OS=Escherichia coli (strain K12) GN=cysG PE=1 SV=1	cysG	3	162.84	49902	2	30	40	57	28	44	43	40	40	45	31	31	31	19	20	43	57	60	54	44	39	44	53
P17109	2-succinyl-5-enolpyruvyl-6-hydroxy-3-cyclohexene-1-carboxylate synthase OS=Escherichia coli (strain K12) GN=menD PE=1 SV=4	menD	3	132.23	61310.7	1	2	19	NA	1	2	1	1	2	1	0	17	0	1	1	1	6	1	NA	NA	0	1	NA
P30748	Molybdopterin synthase sulfur carrier subunit OS=Escherichia coli (strain K12) GN=moaD PE=1 SV=2	moaD	3	188.47	8734.43	2	1168	1241	886	583	582	853	719	897	515	237	206	264	1172	1530	2974	1675	1762	1441	922	786	827	1154
P27278	Trifunctional NAD biosynthesis/regulator protein NadR OS=Escherichia coli (strain K12) GN=nadR PE=1 SV=2	nadR	3	98.14	47297.8	2	16	15	11	9	14	19	18	16	23	20	21	22	8	11	11	15	14	16	16	21	14	18
P36999	Ribosomal RNA large subunit methyltransferase A OS=Escherichia coli (strain K12) GN=rlmA PE=1 SV=1	rlmA	3	92.01	30381.2	2	13	21	7	5	7	5	8	6	5	4	4	4	6	4	8	6	8	5	4	3	5	4
P0AEN8	L-fucose mutarotase OS=Escherichia coli (strain K12) GN=fucU PE=1 SV=1	fucU	3	162.4	15445.2	2	265	309	300	180	279	322	428	509	420	399	369	281	153	144	235	656	254	347	494	359	342	320
P31678	Trehalose-phosphate phosphatase OS=Escherichia coli (strain K12) GN=otsB PE=1 SV=2	otsB	3	148.95	29138.9	2	138	154	148	109	90	94	87	65	74	69	73	67	88	84	208	118	172	83	95	115	86	82
P39160	D-mannonate oxidoreductase OS=Escherichia coli (strain K12) GN=uxuB PE=3 SV=1	uxuB	3	165.2	53527.9	2	20	182	81	31	48	41	40	29	33	49	55	37	3	3	11	25	9	16	89	45	47	27
P69795	N,N'-diacetylchitobiose-specific phosphotransferase enzyme IIB component OS=Escherichia coli (strain K12) GN=chbB PE=1 SV=1	chbB	3	190.13	11401.2	2	505	1330	732	723	789	1499	667	757	767	996	1004	1024	183	189	487	269	337	367	1039	549	439	300
P0AEW6	Inosine-guanosine kinase OS=Escherichia coli (strain K12) GN=gsk PE=1 SV=1	gsk	3	249.9	48400.1	2	46	114	79	17	21	34	17	26	29	18	9	11	39	40	72	23	25	30	27	18	29	41
P0C8K0	D-tagatose-1,6-bisphosphate aldolase subunit kbaZ OS=Escherichia coli (strain K12) GN=kbaZ PE=1 SV=1	kbaZ	3	159.18	47144.7	1	6	9	NA	1	21	3	6	2	3	8	3	1	1	4	2	5	3	NA	NA	1	5	NA
Q46938	4-deoxy-L-threo-5-hexosulose-uronate ketol-isomerase OS=Escherichia coli (strain K12) GN=kduI PE=1 SV=1	kduI	3	128.69	31038.2	1	19	32	NA	1	3	16	1	2	15	5	13	2	0	1	5	7	5	NA	NA	7	6	NA
P77432	Autoinducer 2 kinase LsrK OS=Escherichia coli (strain K12) GN=lsrK PE=1 SV=1	lsrK	3	190.08	57490	2	6	22	14	14	23	5	9	7	12	10	22	58	28	16	6	1	4	4	2	14	8	2
P54746	Alpha-mannosidase mngB OS=Escherichia coli (strain K12) GN=mngB PE=1 SV=2	mngB	3	66.63	99933.3	1	2	2	NA	1	4	3	0	69	2	33	14	2	1	1	0	1	0	NA	NA	1	2	NA
P62601	Cytoplasmic trehalase OS=Escherichia coli (strain K12) GN=treF PE=1 SV=1	treF	3	103.5	63638.5	1	11	3	NA	0	4	3	5	2	1	3	0	1	0	2	8	7	7	NA	NA	2	2	NA
P31434	Alpha-xylosidase OS=Escherichia coli (strain K12) GN=yicI PE=1 SV=2	yicI	3	189.2	88005.1	2	1	8	3	0	0	1	1	0	1	1	1	1	1	2	1	2	1	55	8	2	2	5
P32134	Uncharacterized protein yihM OS=Escherichia coli (strain K12) GN=yihM PE=4 SV=1	yihM	3	79.06	36900.8	1	12	23	NA	8	12	13	15	10	13	60	8	5	35	82	27	113	93	NA	NA	6	12	NA
P28248	Deoxycytidine triphosphate deaminase OS=Escherichia coli (strain K12) GN=dcd PE=1 SV=1	dcd	3	205.45	21218	2	513	645	543	565	695	619	509	532	449	479	444	323	222	255	678	501	634	609	567	470	508	482
P06968	Deoxyuridine 5'-triphosphate nucleotidohydrolase OS=Escherichia coli (strain K12) GN=dut PE=1 SV=1	dut	3	235.38	16127.2	2	3161	5755	5250	1104	2066	2171	2295	2357	1918	1407	1008	776	1269	1065	3280	4283	2478	2678	1999	1596	2438	2584
P0A7E3	Orotate phosphoribosyltransferase OS=Escherichia coli (strain K12) GN=pyrE PE=1 SV=2	pyrE	3	96.67	23534.2	2	22	18	2	2	7	3	6	7	5	2	1	1	0	0	9	9	4	4	1	2	1	1
P31441	Adenine deaminase OS=Escherichia coli (strain K12) GN=ade PE=1 SV=2	ade	3	198.48	63681.1	2	5	54	32	7	13	6	8	8	18	22	20	11	8	6	5	1	2	2	7	4	6	3
P77788	CTP pyrophosphohydrolase OS=Escherichia coli (strain K12) GN=nudG PE=1 SV=1	nudG	3	196.73	15018.7	1	271	412	NA	184	78	383	247	188	403	169	53	116	24	168	33	1454	467	NA	NA	161	299	NA
P76641	Guanine deaminase OS=Escherichia coli (strain K12) GN=guaD PE=1 SV=1	guaD	3	114.18	50194.2	1	5	4	NA	2	7	5	6	1	4	9	2	2	1	0	3	3	3	NA	NA	3	2	NA
P15770	Shikimate dehydrogenase OS=Escherichia coli (strain K12) GN=aroE PE=1 SV=1	aroE	3	264.79	29377.1	2	121	221	213	125	129	111	156	115	103	89	83	73	70	82	233	130	216	161	91	106	101	164
P15993	Aromatic amino acid transport protein AroP OS=Escherichia coli (strain K12) GN=aroP PE=1 SV=3	aroP	3	168.33	49639.3	2	200	25	15	87	166	154	139	111	231	162	146	129	21	19	58	94	89	70	95	43	113	137
P0AAE0	D-serine/D-alanine/glycine transporter OS=Escherichia coli (strain K12) GN=cycA PE=1 SV=1	cycA	3	148.09	51607.3	2	180	185	488	384	544	425	318	449	733	880	762	822	45	39	139	230	210	310	412	267	465	324
P76541	Ethanolamine utilization protein EutL OS=Escherichia coli (strain K12) GN=eutL PE=1 SV=1	eutL	3	174.25	22755.5	2	98	126	148	95	106	85	110	89	152	136	152	145	57	64	141	103	73	111	80	119	74	64
P52095	Lysine decarboxylase, constitutive OS=Escherichia coli (strain K12) GN=ldcC PE=1 SV=2	ldcC	3	123.54	80520.4	2	6	10	5	10	11	12	7	7	12	14	17	21	7	14	4	3	9	5	7	8	8	5
P0ADA1	Acyl-CoA thioesterase I OS=Escherichia coli (strain K12) GN=tesA PE=1 SV=1	tesA	3	226.25	23589.1	2	168	120	211	173	246	196	196	233	176	200	163	175	136	124	306	204	217	144	205	142	127	148
P77806	Aminotransferase YbdL OS=Escherichia coli (strain K12) GN=ybdL PE=1 SV=1	ybdL	3	102.56	42917.8	2	56	26	23	34	43	36	54	35	47	30	30	28	6	3	10	53	51	50	51	44	54	66
P75745	Uncharacterized protein ybgK OS=Escherichia coli (strain K12) GN=ybgK PE=4 SV=1	ybgK	3	54.16	34346.5	2	10	15	20	6	8	17	22	18	16	18	17	9	2	1	23	29	21	19	16	18	16	18
P0AAG3	Glutamate/aspartate transport ATP-binding protein GltL OS=Escherichia coli (strain K12) GN=gltL PE=3 SV=1	gltL	3	199.56	26625.9	2	82	65	86	49	108	101	99	102	93	101	97	83	69	69	85	77	115	93	116	76	105	114
P22729	High-affinity branched-chain amino acid transport system permease protein livM OS=Escherichia coli (strain K12) GN=livM PE=3 SV=2	livM	3	115.99	46221	2	71	13	20	33	81	94	85	91	137	115	104	77	18	23	28	67	37	85	101	71	120	133
P76176	Uncharacterized serine protease ydgD OS=Escherichia coli (strain K12) GN=ydgD PE=3 SV=1	ydgD	3	73.97	29240.9	1	15	23	NA	5	18	12	11	14	10	10	60	9	19	14	6	6	7	NA	NA	4	19	NA
P00903	Para-aminobenzoate synthase glutamine amidotransferase component II OS=Escherichia coli (strain K12) GN=pabA PE=1 SV=1	pabA	3	181.4	20740.6	1	152	128	NA	30	81	66	106	11	37	72	49	24	72	37	111	120	106	NA	NA	35	19	NA
P0AFH2	Oligopeptide transport system permease protein oppB OS=Escherichia coli (strain K12) GN=oppB PE=1 SV=1	oppB	3	133.15	33403.2	2	46	344	702	15	40	57	30	54	86	54	40	21	5	9	34	30	51	62	37	11	53	78
P38105	Starvation-sensing protein RspB OS=Escherichia coli (strain K12) GN=rspB PE=3 SV=1	rspB	3	102.23	36523	1	1	2	NA	0	1	3	9	15	0	0	9	4	0	1	6	1	4	NA	NA	2	1	NA
P39280	Uncharacterized KamA family protein YjeK OS=Escherichia coli (strain K12) GN=yjeK PE=3 SV=1	epmB	3	146.4	38707.2	2	53	89	56	16	33	26	33	23	17	9	4	3	0	0	3	16	5	26	16	15	20	24
P0AC30	Cell division protein ftsX OS=Escherichia coli (strain K12) GN=ftsX PE=1 SV=1	ftsX	3	175.49	38501.3	2	34	59	47	26	32	63	30	35	61	51	52	53	32	17	11	79	39	54	58	47	40	69
P25536	Maf-like protein yhdE OS=Escherichia coli (strain K12) GN=yhdE PE=1 SV=1	yhdE	3	127.72	21484.2	2	204	200	326	78	94	100	112	91	73	50	38	27	126	55	161	408	132	100	72	53	73	98
P0AF26	Nitrate reductase molybdenum cofactor assembly chaperone NarJ OS=Escherichia coli (strain K12) GN=narJ PE=1 SV=1	narJ	3	122.99	26414.5	2	1	44	2	1	4	7	8	6	2	3	3	4	2	0	0	8	6	1	2	1	2	1
P0AFC3	NADH-quinone oxidoreductase subunit A OS=Escherichia coli (strain K12) GN=nuoA PE=3 SV=1	nuoA	3	144.85	16428.6	2	437	1949	1567	427	652	928	739	566	1200	933	832	715	156	243	268	669	615	598	696	337	511	970
P0AFD4	NADH-quinone oxidoreductase subunit H OS=Escherichia coli (strain K12) GN=nuoH PE=1 SV=1	nuoH	3	152.72	36177	2	133	526	330	151	127	186	152	169	280	217	167	85	24	12	4	22	52	29	61	30	22	92
P0AB98	ATP synthase subunit a OS=Escherichia coli (strain K12) GN=atpB PE=1 SV=1	atpB	3	280.94	30265.4	2	1155	1881	2490	770	1867	1355	2109	3159	2822	2035	1353	1302	689	476	1186	2110	1371	2339	2386	1581	2903	3191
P0ABK2	Cytochrome d ubiquinol oxidase subunit 2 OS=Escherichia coli (strain K12) GN=cydB PE=1 SV=1	cydB	3	96.92	42407	2	43	197	51	52	54	88	67	81	138	132	154	205	49	42	37	103	75	65	45	56	49	79
P0ACE0	Hydrogenase-2 large chain OS=Escherichia coli (strain K12) GN=hybC PE=1 SV=2	hybC	3	227.61	62433.7	2	5	93	20	4	8	4	5	4	7	49	41	26	1	0	2	9	1	5	6	2	10	3
P0AEV9	Hydrogenase 3 maturation protease OS=Escherichia coli (strain K12) GN=hycI PE=1 SV=2	hycI	3	119.99	17027.4	2	11	10	15	13	10	14	17	17	12	11	11	11	39	17	13	17	30	21	13	20	15	15
P76149	Aldehyde dehydrogenase-like protein yneI OS=Escherichia coli (strain K12) GN=yneI PE=1 SV=2	sad	3	162.33	49668.2	2	17	16	7	5	13	21	26	11	15	8	13	4	2	5	17	23	61	34	25	23	39	27
Q46800	Xanthine dehydrogenase FAD-binding subunit OS=Escherichia coli (strain K12) GN=xdhB PE=3 SV=1	xdhB	3	128.44	31519.1	1	9	1	NA	1	9	5	3	3	6	15	69	2	0	0	0	0	5	NA	NA	2	5	NA
P77695	Protein gnsB OS=Escherichia coli (strain K12) GN=gnsB PE=3 SV=2	gnsB	3	233.83	6525.55	2	1727	1966	2037	1127	1461	1710	1496	1371	1615	1551	1153	927	2600	1311	2596	2072	2423	2004	1786	1375	1503	1900
P0AEV4	Formate hydrogenlyase regulatory protein hycA OS=Escherichia coli (strain K12) GN=hycA PE=1 SV=1	hycA	3	59.03	17597.8	2	65	161	110	17	18	10	14	7	11	11	6	5	1	1	0	0	3	0	4	2	2	4
P0AAN9	Anti-adapter protein iraP OS=Escherichia coli (strain K12) GN=iraP PE=1 SV=1	iraP	3	227.96	9913.19	2	1894	3262	3405	2532	3013	3052	2853	3266	3431	3439	3158	2633	1253	1423	3308	3131	2511	3156	3437	1725	2925	2082
P0AFM4	Phosphate starvation-inducible protein psiF OS=Escherichia coli (strain K12) GN=psiF PE=1 SV=1	psiF	3	135.17	11660.9	2	41	37	41	29	22	27	23	18	42	45	58	57	310	261	132	39	88	18	16	51	15	19
P27832	Lipopolysaccharide biosynthesis protein RffC OS=Escherichia coli (strain K12) GN=rffC PE=4 SV=3	rffC	3	216.44	24187.4	1	29	31	NA	5	19	13	10	4	9	5	2	3	2	2	2	5	4	NA	NA	1	6	NA
P0AFZ1	Protein sseB OS=Escherichia coli (strain K12) GN=sseB PE=4 SV=1	sseB	3	136.82	28606.6	2	436	683	713	213	212	235	254	190	248	174	103	78	71	84	421	319	317	353	322	122	236	376
P0AA95	Uncharacterized protein yacC OS=Escherichia coli (strain K12) GN=yacC PE=4 SV=1	yacC	3	191.02	12827.4	1	66	87	NA	72	54	51	43	32	72	57	53	62	312	91	73	78	94	NA	NA	45	48	NA
P46122	Uncharacterized lipoprotein yajI OS=Escherichia coli (strain K12) GN=yajI PE=1 SV=3	yajI	3	154.95	19530.1	1	192	141	NA	90	30	181	45	11	109	32	4	44	49	96	80	93	59	NA	NA	31	16	NA
P0AAU7	Uncharacterized protein ybfE OS=Escherichia coli (strain K12) GN=ybfE PE=4 SV=2	ybfE	3	143.5	11255	1	35	23	NA	1	15	7	4	10	5	24	1	3	0	2	6	5	14	NA	NA	1	10	NA
P0AB61	Protein yciN OS=Escherichia coli (strain K12) GN=yciN PE=1 SV=1	yciN	3	154.67	9361.8	2	680	2099	1537	501	574	942	787	615	506	462	406	397	470	262	1627	1343	1105	914	644	674	696	965
P76220	Uncharacterized protein ydjY OS=Escherichia coli (strain K12) GN=ydjY PE=4 SV=2	ydjY	3	95.67	24091.9	2	1	1	2	3	2	1	2	4	3	1	1	1	8	4	1	5	4	2	2	1	2	3
P64499	Uncharacterized protein yebO OS=Escherichia coli (strain K12) GN=yebO PE=4 SV=1	yebO	3	193.11	10767.8	2	441	350	360	34	72	126	105	68	86	16	12	11	5	1	247	193	118	246	84	36	115	269
P64503	Uncharacterized protein yebV OS=Escherichia coli (strain K12) GN=yebV PE=4 SV=1	yebV	3	313.53	8729.18	2	1369	768	1672	3555	2309	2256	1782	2005	1454	1899	1837	2349	732	794	4616	1199	6479	1984	1831	2058	1362	1474
P64506	Uncharacterized protein yebY OS=Escherichia coli (strain K12) GN=yebY PE=4 SV=1	yebY	3	184.15	12352.5	2	1393	1519	1055	491	437	457	600	663	427	252	229	200	283	786	1534	1405	1279	541	463	296	502	789
P76550	Uncharacterized protein yffS OS=Escherichia coli (strain K12) GN=yffS PE=4 SV=2	yffS	3	208.5	29714.1	2	46	98	61	39	51	62	50	51	40	39	35	35	38	16	41	67	33	46	46	44	39	50
P0AD53	Uncharacterized protein ygaC OS=Escherichia coli (strain K12) GN=ygaC PE=4 SV=1	ygaC	3	111.58	13039.6	1	33	38	NA	10	54	38	17	9	33	7	30	8	22	18	41	29	66	NA	NA	10	11	NA
P64574	Uncharacterized protein yghW OS=Escherichia coli (strain K12) GN=yghW PE=4 SV=1	yghW	3	114.09	10920.3	1	1	1	NA	0	0	0	2	0	16	20	14	2	5	2	4	2	1	NA	NA	0	0	NA
P0AF70	Uncharacterized protein yjeI OS=Escherichia coli (strain K12) GN=yjeI PE=4 SV=1	yjeI	3	229.67	11932.7	2	822	1709	2265	1088	1166	1929	1207	1217	3456	3522	3447	2633	2049	2144	3952	1306	1802	1825	651	1326	990	873
P0AAS0	Inner membrane protein ylaC OS=Escherichia coli (strain K12) GN=ylaC PE=1 SV=2	ylaC	3	288.23	18237.5	2	145	1531	504	53	87	291	65	66	59	33	21	31	2	1	39	25	82	66	64	64	83	73
P0AB46	Uncharacterized protein ymgD OS=Escherichia coli (strain K12) GN=ymgD PE=4 SV=2	ymgD	3	82.72	11826.1	1	4	11	NA	3	4	11	0	17	1	13	11	1	106	188	16	12	3	NA	NA	0	0	NA
P76170	UPF0482 protein ynfB OS=Escherichia coli (strain K12) GN=ynfB PE=1 SV=1	ynfB	3	115.76	12882.6	2	459	581	550	356	466	514	542	530	376	384	381	404	524	436	790	1035	764	572	373	539	445	537
P64519	Uncharacterized protein yodD OS=Escherichia coli (strain K12) GN=yodD PE=4 SV=1	yodD	3	220.61	8556.09	2	83	124	52	79	82	84	79	43	75	86	81	164	890	826	238	168	174	108	77	90	105	60
P64564	Uncharacterized protein yggT OS=Escherichia coli (strain K12) GN=yggT PE=3 SV=1	yggT	3	141.77	21134.8	2	212	280	202	135	177	204	239	272	317	243	235	191	110	115	141	313	158	266	251	136	178	355
P46118	HTH-type transcriptional regulator hexR OS=Escherichia coli (strain K12) GN=hexR PE=3 SV=2	hexR	3	160.02	31937.4	2	25	94	94	33	56	73	78	77	75	88	61	52	32	10	7	13	10	49	82	51	65	70
P45530	Protein tusB OS=Escherichia coli (strain K12) GN=tusB PE=1 SV=1	tusB	3	193.98	10693.6	1	184	199	NA	122	106	181	95	135	152	181	172	130	176	171	150	179	199	NA	NA	92	120	NA
P60472	Undecaprenyl pyrophosphate synthase OS=Escherichia coli (strain K12) GN=uppS PE=1 SV=1	uppS	3	121.25	28408.4	1	31	119	NA	11	6	26	26	11	12	21	29	4	6	1	17	12	22	NA	NA	5	22	NA
P31545	Peroxidase ycdB OS=Escherichia coli (strain K12) GN=ycdB PE=1 SV=2	ycdB	3	105.91	46706.9	1	10	3	NA	0	5	1	1	1	2	0	8	0	8	2	1	1	12	NA	NA	0	1	NA
P76507	Uncharacterized protein yfdI OS=Escherichia coli (strain K12) GN=yfdI PE=4 SV=1	yfdI	3	191.31	51431.8	2	114	311	191	41	71	103	70	55	161	121	86	41	27	23	53	50	43	57	41	26	43	80
P37340	Multidrug resistance protein mdtK OS=Escherichia coli (strain K12) GN=mdtK PE=1 SV=2	mdtK	2	65.33	49396.5	2	8	16	10	4	2	14	11	5	17	10	10	10	21	13	16	11	20	12	6	4	7	12
P75820	N-acetylmuramoyl-L-alanine amidase AmiD OS=Escherichia coli (strain K12) GN=amiD PE=1 SV=1	amiD	2	66.89	31035.1	2	54	58	63	50	47	50	47	42	41	53	39	44	53	67	68	39	52	40	46	58	41	29
P0ABV6	Protein tolR OS=Escherichia coli (strain K12) GN=tolR PE=1 SV=1	tolR	2	80.73	15355.4	2	174	216	85	57	95	134	106	112	95	60	47	42	111	122	152	280	214	152	104	66	99	179
P0ADZ7	UPF0092 membrane protein yajC OS=Escherichia coli (strain K12) GN=yajC PE=1 SV=1	yajC	2	77.83	11861.4	2	5021	7451	8015	2870	4555	5459	5364	5750	3277	2991	2836	2476	2396	2184	4424	5293	4155	5070	4252	3537	4591	5367
P31600	Bacteriophage N4 adsorption protein A OS=Escherichia coli (strain K12) GN=nfrA PE=4 SV=1	nfrA	2	49.63	111222	1	0	1	NA	0	0	0	0	0	0	0	1	1	0	0	0	0	1	NA	NA	0	0	NA
P30847	Signal transduction histidine-protein kinase BaeS OS=Escherichia coli (strain K12) GN=baeS PE=3 SV=2	baeS	2	90.99	51941.2	2	9	15	8	20	14	12	16	10	13	13	10	11	5	6	7	23	9	13	16	9	13	17
P0ABE2	Protein BolA OS=Escherichia coli (strain K12) GN=bolA PE=1 SV=1	bolA	2	165.66	11968.1	2	279	744	292	141	182	202	230	124	201	177	139	132	447	400	275	496	242	213	137	148	121	165
P0AE67	Chemotaxis protein CheY OS=Escherichia coli (strain K12) GN=cheY PE=1 SV=2	cheY	2	132.52	14070.3	2	28	20	85	21	35	135	21	17	136	369	115	22	22	4	44	27	49	27	42	24	43	39
P21865	Sensor protein kdpD OS=Escherichia coli (strain K12) GN=kdpD PE=1 SV=2	kdpD	2	192.93	98638.9	2	3	2	1	2	2	2	3	3	5	4	6	6	1	2	3	5	4	4	4	3	2	4
P23837	Sensor protein phoQ OS=Escherichia coli (strain K12) GN=phoQ PE=1 SV=1	phoQ	2	76.32	55246.8	2	12	32	14	15	14	20	15	19	18	22	21	23	5	6	9	12	11	16	22	14	24	22
Q06065	Acetoacetate metabolism regulatory protein AtoC OS=Escherichia coli (strain K12) GN=atoC PE=3 SV=2	atoC	2	108.29	52125.2	2	2	12	8	8	7	3	5	5	12	17	18	16	0	1	2	5	4	5	6	3	6	5
P0AE72	Antitoxin MazE OS=Escherichia coli (strain K12) GN=mazE PE=1 SV=1	mazE	2	93.21	9331.88	1	30	44	NA	22	33	29	13	15	31	14	20	22	50	48	22	25	35	NA	NA	16	26	NA
P0AEV1	Protein hnr OS=Escherichia coli (strain K12) GN=hnr PE=1 SV=1	rssB	2	150.97	37260.5	2	13	5	4	11	13	17	14	10	10	11	11	9	7	7	12	18	23	13	15	20	17	12
P30843	Transcriptional regulatory protein BasR OS=Escherichia coli (strain K12) GN=basR PE=2 SV=3	basR	2	83.85	24997.1	2	13	21	11	12	33	13	43	27	19	23	23	32	10	8	8	11	15	24	24	45	21	17
P0AGA6	Transcriptional regulatory protein uhpA OS=Escherichia coli (strain K12) GN=uhpA PE=1 SV=1	uhpA	2	230.32	20857.9	2	39	62	44	41	36	36	37	32	29	27	26	21	3	2	38	26	17	30	34	26	6	23
P76330	Probable diguanylate cyclase YedQ OS=Escherichia coli (strain K12) GN=yedQ PE=2 SV=2	yedQ	2	40.22	64224.8	2	7	11	7	13	7	9	6	6	15	18	16	17	10	10	6	9	8	10	11	8	13	21
P37649	Protein YhjK OS=Escherichia coli (strain K12) GN=yhjK PE=1 SV=3	yhjK	2	66.32	74315.4	2	3	4	4	4	4	5	3	5	10	9	8	11	4	5	3	5	3	1	4	5	5	3
P0AE91	Protein CreA OS=Escherichia coli (strain K12) GN=creA PE=4 SV=1	creA	2	105.04	17079	2	246	443	346	139	180	182	209	200	237	236	193	243	171	170	271	452	247	216	183	213	195	244
P09549	Protein dedD OS=Escherichia coli (strain K12) GN=dedD PE=4 SV=2	dedD	2	71.68	22906.2	2	40	84	63	21	30	41	35	34	30	24	27	27	8	1	37	56	34	21	28	36	29	30
P16681	Protein phnB OS=Escherichia coli (strain K12) GN=phnB PE=1 SV=1	phnB	2	129.08	16142.7	2	27	37	28	46	48	72	33	28	23	34	53	79	68	159	32	15	61	19	31	100	20	15
P0A8R4	Protein slyX OS=Escherichia coli (strain K12) GN=slyX PE=3 SV=1	slyX	2	102.03	8191.18	2	282	450	263	130	245	171	234	251	173	146	91	80	99	111	215	311	168	142	133	143	183	110
P0AA99	Putative L,D-transpeptidase YafK OS=Escherichia coli (strain K12) GN=yafK PE=3 SV=1	yafK	2	76.02	27985.1	2	80	15	15	22	32	41	51	48	39	26	19	6	21	14	27	68	22	92	65	30	48	79
P0C037	UPF0345 protein yaiE OS=Escherichia coli (strain K12) GN=yaiE PE=3 SV=1	yaiE	2	111.61	10209.9	2	1345	954	1415	556	1278	1369	1772	1349	1229	1101	984	682	1074	781	1670	799	1064	1632	1315	1005	1020	1559
P75829	Uncharacterized protein ybjX OS=Escherichia coli (strain K12) GN=ybjX PE=4 SV=1	ybjX	2	110.37	38314.7	2	3	22	8	1	2	2	2	1	1	3	1	1	0	0	0	0	1	1	1	0	2	2
P0AB12	Inner membrane protein yccF OS=Escherichia coli (strain K12) GN=yccF PE=1 SV=1	yccF	2	60.18	16246.9	2	268	540	307	83	154	263	229	123	392	332	282	313	162	126	257	341	315	295	152	145	195	341
P75954	Probable L,D-transpeptidase YcfS OS=Escherichia coli (strain K12) GN=ycfS PE=1 SV=1	ycfS	2	122.98	34596.1	2	20	25	57	12	31	5	42	35	3	3	1	1	0	0	0	1	2	1	23	1	32	7
P29013	Uncharacterized protein ycgB OS=Escherichia coli (strain K12) GN=ycgB PE=4 SV=2	ycgB	2	127.37	60757	2	5	36	6	8	10	8	11	5	8	9	13	17	8	6	6	5	17	7	7	9	7	6
P0ACW6	Uncharacterized protein ydcH OS=Escherichia coli (strain K12) GN=ydcH PE=4 SV=2	ydcH	2	81.41	8854.62	2	1	44	2	41	12	1	6	5	7	15	34	9	23	51	2	3	1	8	18	21	17	12
P0ACY9	Uncharacterized protein yebG OS=Escherichia coli (strain K12) GN=yebG PE=4 SV=1	yebG	2	72.07	10692.3	2	296	832	733	80	131	253	210	200	158	109	62	23	3	5	187	318	78	172	142	48	151	178
P0A8B2	UPF0115 protein yfcN OS=Escherichia coli (strain K12) GN=yfcN PE=3 SV=1	yfcN	2	97.99	20982	2	74	69	76	44	58	59	59	62	59	46	43	33	11	42	107	79	72	84	51	25	55	62
P0ADQ7	Uncharacterized protein ygaM OS=Escherichia coli (strain K12) GN=ygaM PE=4 SV=1	ygaM	2	116.95	12262.1	2	501	531	586	893	1062	627	680	428	1246	1145	1393	1119	1226	764	1669	473	1455	461	630	1540	467	454
P37642	Inner membrane protein yhjD OS=Escherichia coli (strain K12) GN=yhjD PE=1 SV=1	yhjD	2	99.44	37869.2	2	25	54	25	21	27	36	27	19	35	25	37	51	17	38	82	55	98	38	44	48	35	59
P0ACC3	Iron-sulfur cluster insertion protein erpA OS=Escherichia coli (strain K12) GN=erpA PE=1 SV=1	erpA	2	110.04	12074.8	2	3607	3853	4824	1790	2704	2546	3460	2826	2190	1691	1178	993	391	378	2301	4232	2755	3127	2955	2139	3604	3877
P64461	Autoinducer 2-degrading protein lsrG OS=Escherichia coli (strain K12) GN=lsrG PE=1 SV=1	lsrG	2	73.7	11229.6	2	4	3	1	8	28	1	3	2	3	3	12	21	2	6	2	6	18	8	2	13	7	10
P39371	N-acetylneuraminate epimerase OS=Escherichia coli (strain K12) GN=nanM PE=1 SV=2	nanM	2	67.19	39529.6	1	7	40	NA	13	3	2	8	8	15	23	25	28	61	20	8	6	17	NA	NA	17	4	NA
P0AF90	Regulator of ribonuclease activity B OS=Escherichia coli (strain K12) GN=rraB PE=1 SV=1	rraB	2	130.25	15575	2	1939	1905	2440	2027	1856	1962	1617	1605	2453	1906	1606	1421	2648	2488	3057	1901	3574	2225	1499	1249	1455	2045
P77667	Protein sufA OS=Escherichia coli (strain K12) GN=sufA PE=1 SV=1	sufA	2	106.76	13273.5	2	395	343	385	204	153	196	217	191	243	144	125	79	143	101	1011	351	276	448	169	124	138	210
P0A8E5	UPF0231 protein yacL OS=Escherichia coli (strain K12) GN=yacL PE=3 SV=1	yacL	2	116.33	13914.5	1	171	252	NA	126	116	192	95	92	131	104	111	103	377	435	94	139	130	NA	NA	92	104	NA
P0AAQ6	Uncharacterized protein ybaA OS=Escherichia coli (strain K12) GN=ybaA PE=4 SV=1	ybaA	2	134.3	13291.4	1	75	78	NA	28	69	166	36	26	42	21	15	53	265	330	50	130	83	NA	NA	56	16	NA
P0AAT2	Uncharacterized protein ybdF OS=Escherichia coli (strain K12) GN=ybdF PE=4 SV=1	ybdF	2	83.22	14023.4	1	177	53	NA	47	56	48	52	15	48	15	3	56	82	76	47	72	59	NA	NA	25	33	NA
P0A8L7	UPF0263 protein yciU OS=Escherichia coli (strain K12) GN=yciU PE=1 SV=1	yciU	2	98.1	12661	1	140	137	NA	92	84	113	82	56	62	124	41	22	4	21	68	61	25	NA	NA	65	194	NA
P0AB10	Uncharacterized lipoprotein ymbA OS=Escherichia coli (strain K12) GN=ymbA PE=4 SV=2	ymbA	2	79.33	20603.6	2	84	141	117	60	67	78	61	54	49	51	62	57	43	56	78	79	106	43	50	46	64	55
Q46919	Uncharacterized protein yqcC OS=Escherichia coli (strain K12) GN=yqcC PE=1 SV=1	yqcC	2	89.12	12760.3	2	137	352	257	78	88	68	88	78	57	50	31	28	2	1	93	69	112	114	99	57	115	97
P0AA63	Inner membrane protein YqjA OS=Escherichia coli (strain K12) GN=yqjA PE=1 SV=1	yqjA	2	132.97	24551.3	2	37	17	12	18	25	10	53	64	25	22	14	17	4	6	12	25	8	37	59	21	40	79
P64585	Inner membrane protein yqjE OS=Escherichia coli (strain K12) GN=yqjE PE=1 SV=1	yqjE	2	88.97	15119.2	2	12	25	14	15	20	17	20	10	15	15	27	17	2	0	12	20	8	4	19	8	4	11
P0AE48	Gamma-glutamylcyclotransferase family protein ytfP OS=Escherichia coli (strain K12) GN=ytfP PE=1 SV=1	ytfP	2	128.08	12840.4	2	1078	1217	919	507	770	873	1161	515	634	415	500	306	474	627	673	1032	1360	857	626	660	895	1308
P0ADC8	Uncharacterized protein yjiX OS=Escherichia coli (strain K12) GN=yjiX PE=4 SV=1	yjiX	2	76.31	7705.59	1	24	177	NA	2	8	38	1	80	1	142	2	1	10	7	5	2	3	NA	NA	1	1	NA
P0ADU7	Uncharacterized protein yqiB OS=Escherichia coli (strain K12) GN=yqiB PE=4 SV=1	yqiB	2	134.17	16519.2	1	14	38	NA	2	16	7	14	4	5	2	5	1	2	4	12	30	24	NA	NA	1	5	NA
P64534	Uncharacterized protein yohN OS=Escherichia coli (strain K12) GN=yohN PE=4 SV=1	rcnB	2	177.09	12440.2	2	444	883	607	365	415	489	437	464	423	348	353	285	527	412	605	670	783	441	369	391	393	470
P0AAT6	Uncharacterized protein ybeB OS=Escherichia coli (strain K12) GN=ybeB PE=1 SV=1	rsfS	2	134.46	11556.8	2	69	185	98	15	22	21	24	16	22	15	8	5	4	6	36	18	20	30	18	10	18	28
P28634	UPF0066 protein yaeB OS=Escherichia coli (strain K12) GN=yaeB PE=1 SV=2	tsaA	2	68.97	26327.7	2	65	98	68	52	62	54	62	55	58	50	41	33	49	65	100	105	91	109	55	63	80	85
P0A6A0	Probable ubiquinone biosynthesis protein UbiB OS=Escherichia coli (strain K12) GN=ubiB PE=1 SV=1	ubiB	2	87.28	63144.4	2	3	9	3	3	2	2	2	2	7	5	7	6	0	0	1	0	0	0	0	0	1	2
P13001	Carboxylesterase BioH OS=Escherichia coli (strain K12) GN=bioH PE=1 SV=1	bioH	2	101.22	28468.9	2	68	68	71	61	20	21	26	36	27	24	16	14	25	13	27	13	46	27	18	19	23	30
P0AE63	Cation transport regulator ChaB OS=Escherichia coli (strain K12) GN=chaB PE=1 SV=1	chaB	2	51.57	8921.35	2	79	22	39	62	103	56	72	46	71	54	53	66	22	33	67	21	210	32	79	137	54	65
P39405	Ferric iron reductase protein fhuF OS=Escherichia coli (strain K12) GN=fhuF PE=1 SV=1	fhuF	2	85.56	30075.3	2	1	1	1	1	2	3	6	2	3	0	1	1	3	1	77	25	53	44	9	8	15	13
P31828	Probable zinc protease pqqL OS=Escherichia coli (strain K12) GN=pqqL PE=3 SV=2	pqqL	2	106.67	104574	2	8	8	9	2	6	6	5	5	7	5	3	2	3	2	8	4	4	6	5	3	5	5
P0A944	Ribosomal-protein-alanine acetyltransferase OS=Escherichia coli (strain K12) GN=rimI PE=3 SV=1	rimI	2	150.95	16581.4	2	45	55	63	53	61	77	73	59	46	47	27	26	14	15	90	49	57	104	93	61	71	91
P0A840	Multifunctional protein surE OS=Escherichia coli (strain K12) GN=surE PE=1 SV=1	surE	2	99.49	26865.6	2	161	215	185	133	180	137	148	186	111	127	126	113	53	68	109	118	76	154	154	118	151	112
P75809	Phosphatase YbjI OS=Escherichia coli (strain K12) GN=ybjI PE=1 SV=3	ybjI	2	75.91	30159.1	2	27	32	29	29	23	16	40	32	27	26	24	11	4	3	58	34	24	47	23	26	22	51
P28306	UPF0755 protein yceG OS=Escherichia coli (strain K12) GN=yceG PE=1 SV=2	yceG	2	51.99	38205.3	2	13	15	10	7	6	11	12	8	12	7	9	8	11	7	8	13	10	10	11	7	6	13
P76046	Uncharacterized protein ycjX OS=Escherichia coli (strain K12) GN=ycjX PE=1 SV=1	ycjX	2	129.46	52558.1	2	31	56	26	16	28	20	34	22	23	16	13	17	9	13	5	53	24	19	19	9	19	15
P76491	5'-nucleotidase yfbR OS=Escherichia coli (strain K12) GN=yfbR PE=1 SV=1	yfbR	2	107.45	22675.6	2	59	63	68	31	41	41	46	38	40	31	20	19	10	12	34	39	34	26	31	19	19	33
P69853	Twin-arginine leader-binding protein dmsD OS=Escherichia coli (strain K12) GN=dmsD PE=1 SV=2	dmsD	2	85.55	23311.7	2	149	163	130	81	68	91	79	73	55	48	41	17	34	44	129	31	30	41	30	16	14	74
P0A8J2	Primosomal protein 1 OS=Escherichia coli (strain K12) GN=dnaT PE=1 SV=2	dnaT	2	80.74	19425	2	55	140	88	37	39	42	37	37	30	27	12	6	24	13	54	104	54	94	70	57	62	83
P37661	Phosphoethanolamine transferase eptB OS=Escherichia coli (strain K12) GN=eptB PE=1 SV=3	eptB	2	88.37	63745.5	2	1	3	2	3	10	6	6	14	4	5	6	7	4	1	2	1	3	3	11	7	5	3
P77712	Long-chain acyl-CoA thioesterase tesC OS=Escherichia coli (strain K12) GN=tesC PE=1 SV=1	fadM	2	81.7	15060.8	2	13	16	12	130	121	63	69	54	79	111	124	115	45	32	38	35	13	13	71	104	81	23
P25746	High frequency lysogenization protein hflD OS=Escherichia coli (strain K12) GN=hflD PE=1 SV=1	hflD	2	137.05	22915.2	2	165	274	218	103	144	203	165	144	170	149	130	115	56	58	54	141	66	143	158	122	137	151
P76341	5-hydroxyisourate hydrolase OS=Escherichia coli (strain K12) GN=hiuH PE=1 SV=1	hiuH	2	65.48	15432.1	2	379	54	44	289	444	78	446	155	134	169	143	71	120	107	94	320	186	132	547	446	217	402
P10423	Alkaline phosphatase isozyme conversion protein OS=Escherichia coli (strain K12) GN=iap PE=3 SV=1	iap	2	67.76	37878.4	1	15	1	NA	1	0	2	0	1	3	3	0	0	4	0	0	1	5	NA	NA	1	2	NA
P0A754	Glutathione-regulated potassium-efflux system ancillary protein kefF OS=Escherichia coli (strain K12) GN=kefF PE=1 SV=1	kefF	2	116.08	20139	1	45	32	NA	21	6	26	33	11	21	14	14	6	2	1	14	10	8	NA	NA	15	32	NA
P37339	L-2-hydroxyglutarate oxidase LhgO OS=Escherichia coli (strain K12) GN=lhgO PE=1 SV=3	lhgO	2	133.96	46034.5	2	10	18	22	13	12	16	12	16	16	14	8	11	6	4	11	8	5	8	12	9	8	10
P77791	Maltose O-acetyltransferase OS=Escherichia coli (strain K12) GN=maa PE=1 SV=3	maa	2	185.09	20065.2	2	68	511	161	69	76	117	71	64	58	80	96	68	2	4	9	24	10	47	102	125	165	87
P43671	Paraquat-inducible protein B OS=Escherichia coli (strain K12) GN=pqiB PE=2 SV=2	pqiB	2	46.18	60464.5	1	1	1	NA	1	7	8	1	85	10	199	1	2	11	28	3	1	1	NA	NA	2	7	NA
P0C0K3	Protein rdoA OS=Escherichia coli (strain K12) GN=rdoA PE=1 SV=1	rdoA	2	60.06	38078.1	2	57	108	83	25	29	26	44	50	19	11	9	6	9	9	10	45	35	31	36	28	39	60
P27240	Lipopolysaccharide core heptose(II) kinase rfaY OS=Escherichia coli (strain K12) GN=rfaY PE=3 SV=2	rfaY	2	32.62	27425.6	2	4	18	19	3	3	6	7	6	6	4	5	5	8	8	24	14	6	6	5	6	4	7
P75782	Ribosomal RNA large subunit methyltransferase F OS=Escherichia coli (strain K12) GN=rlmF PE=1 SV=2	rlmF	2	77.17	34186.5	2	23	44	13	9	23	21	29	18	26	14	16	14	17	8	12	13	14	19	5	18	13	11
P0AFR0	NTE family protein rssA OS=Escherichia coli (strain K12) GN=rssA PE=1 SV=2	rssA	2	49.82	33028.1	1	83	11	NA	46	0	14	3	31	9	6	1	5	1	0	4	3	15	NA	NA	5	8	NA
P33667	tRNA 2-selenouridine synthase OS=Escherichia coli (strain K12) GN=selU PE=1 SV=2	selU	2	112.71	41066.8	1	11	10	NA	1	6	1	28	13	0	5	0	0	1	1	3	3	2	NA	NA	1	7	NA
P77368	UPF0098 protein ybcL OS=Escherichia coli (strain K12) GN=ybcL PE=1 SV=1	ybcL	2	142.76	19445.7	1	10	6	NA	32	40	20	16	17	27	40	49	66	144	76	3	8	2	NA	NA	44	40	NA
P0A8Z3	Acyl-CoA thioester hydrolase YbgC OS=Escherichia coli (strain K12) GN=ybgC PE=1 SV=1	ybgC	2	228.65	15533.9	1	193	242	NA	61	135	155	99	61	90	94	59	45	29	41	113	170	164	NA	NA	63	102	NA
P75785	Putative phosphoethanolamine transferase ybiP OS=Escherichia coli (strain K12) GN=ybiP PE=1 SV=1	ybiP	2	71.59	59650.5	1	0	0	NA	0	0	0	0	0	0	2	0	1	3	0	0	1	1	NA	NA	0	0	NA
P37757	Uncharacterized isomerase yddE OS=Escherichia coli (strain K12) GN=yddE PE=1 SV=2	yddE	2	89.93	32280.5	2	127	98	79	63	92	105	118	89	69	72	67	66	52	55	153	70	106	146	96	85	85	75
P76121	Uncharacterized protein yddH OS=Escherichia coli (strain K12) GN=yddH PE=3 SV=2	yddH	2	127.2	20935.6	2	10	3	5	23	2	5	1	1	11	9	24	31	0	1	2	4	1	0	2	1	0	0
P76234	Uncharacterized protein yeaE OS=Escherichia coli (strain K12) GN=yeaE PE=4 SV=1	yeaE	2	82.78	30948.8	1	30	43	NA	36	27	37	27	24	34	32	25	29	4	4	39	28	31	NA	NA	23	35	NA
P76539	Acetyltransferase YpeA OS=Escherichia coli (strain K12) GN=ypeA PE=3 SV=2	ypeA	2	113.78	16283.1	2	82	179	59	59	103	85	65	69	64	66	67	57	39	44	103	70	105	119	65	42	57	71
P0ADW8	Uncharacterized protein yheV OS=Escherichia coli (strain K12) GN=yheV PE=4 SV=1	yheV	2	172.29	7575.64	1	454	322	NA	220	547	442	287	31	303	109	59	214	124	16	625	428	653	NA	NA	229	312	NA
P39353	Uncharacterized oxidoreductase yjhC OS=Escherichia coli (strain K12) GN=yjhC PE=3 SV=2	yjhC	2	97.51	41339.6	1	10	154	NA	19	28	23	18	25	25	6	18	25	0	0	11	8	14	NA	NA	13	23	NA
P75713	Uncharacterized protein ylbA OS=Escherichia coli (strain K12) GN=ylbA PE=1 SV=1	ylbA	2	93.91	28694.1	2	25	44	27	51	49	23	26	44	65	73	81	110	9	11	8	9	20	13	13	28	43	29
P0AA57	Protein YobA OS=Escherichia coli (strain K12) GN=yobA PE=1 SV=1	yobA	2	41.7	13384	2	180	106	25	120	58	30	78	113	45	34	22	21	11	41	165	135	179	97	87	38	42	150
P77279	Uncharacterized ABC transporter ATP-binding protein YbbL OS=Escherichia coli (strain K12) GN=ybbL PE=1 SV=1	fetA	2	121.29	25348.1	2	70	162	98	51	48	44	37	39	48	34	28	27	14	16	59	34	50	45	36	24	34	32
P64612	Uncharacterized protein YhcM OS=Escherichia coli (strain K12) GN=yhcM PE=1 SV=1	zapE	2	58.27	43018	2	32	31	35	17	22	34	28	28	44	31	29	20	10	8	17	31	20	16	28	16	31	44
P0A8Y8	Esterase YbdB OS=Escherichia coli (strain K12) GN=ybdB PE=1 SV=1	entH	2	163.4	14942.4	2	18	7	13	7	20	14	14	25	18	10	8	8	31	25	501	39	91	72	15	14	30	42
P77608	2-keto-4-pentenoate hydratase OS=Escherichia coli (strain K12) GN=mhpD PE=1 SV=2	mhpD	2	114.79	28853.8	1	7	13	NA	3	25	10	2	4	5	328	2	14	2	3	1	6	1	NA	NA	5	5	NA
P0A9T8	Uncharacterized ABC transporter ATP-binding protein YbbA OS=Escherichia coli (strain K12) GN=ybbA PE=3 SV=1	ybbA	2	146.93	24499.8	2	30	45	49	31	35	21	45	52	16	21	22	16	5	11	26	36	18	34	37	31	28	41
P0ABF4	Ethanolamine utilization protein EutM OS=Escherichia coli (strain K12) GN=eutM PE=1 SV=1	eutM	2	166.04	9841.19	2	14	64	18	18	38	26	17	21	33	62	84	127	3	2	7	30	4	2	11	1	15	3
P37327	Inner membrane protein yfdC OS=Escherichia coli (strain K12) GN=yfdC PE=1 SV=1	yfdC	2	82.78	34462.8	2	12	29	36	16	20	27	24	7	31	44	43	51	8	20	12	15	22	11	25	15	8	15
P69488	Divalent-cation tolerance protein CutA OS=Escherichia coli (strain K12) GN=cutA PE=1 SV=1	cutA	2	102.68	12305.2	2	12	20	47	62	59	33	59	56	86	89	131	113	30	22	121	27	85	21	8	72	38	18
P33650	Ferrous iron transport protein B OS=Escherichia coli (strain K12) GN=feoB PE=1 SV=1	feoB	2	151.09	84400.8	2	9	12	2	7	14	32	20	16	17	10	6	4	3	3	23	47	21	27	20	5	20	31
P13039	Enterochelin esterase OS=Escherichia coli (strain K12) GN=fes PE=1 SV=1	fes	2	109.33	42524.6	2	5	2	2	2	2	1	2	2	1	0	0	0	2	1	69	4	13	46	2	2	4	3
P0AC23	Probable formate transporter 1 OS=Escherichia coli (strain K12) GN=focA PE=1 SV=1	focA	2	112.55	30951.9	2	26	46	40	38	38	35	34	38	52	66	68	66	22	16	28	30	36	24	56	44	43	34
P0AFJ1	Protein phnA OS=Escherichia coli (strain K12) GN=phnA PE=4 SV=1	phnA	2	103.14	12319	2	90	513	193	88	143	115	134	114	121	138	144	145	140	157	209	194	123	116	54	109	103	97
P37028	Vitamin B12-binding protein OS=Escherichia coli (strain K12) GN=btuF PE=1 SV=2	btuF	2	189.51	29330.5	1	21	25	NA	6	13	16	21	11	10	0	2	5	7	4	15	13	11	NA	NA	7	9	NA
P27838	Protein CyaY OS=Escherichia coli (strain K12) GN=cyaY PE=1 SV=1	cyaY	2	107.66	12205.8	2	198	178	121	102	92	105	95	103	103	74	44	50	17	48	141	81	105	77	112	45	80	144
P0AEB0	Sulfate transport system permease protein CysW OS=Escherichia coli (strain K12) GN=cysW PE=1 SV=1	cysW	2	132.75	32498.4	2	39	9	19	27	45	34	42	45	54	32	21	9	1	4	8	60	30	39	30	21	47	71
P0A9A2	Ferritin-like protein 2 OS=Escherichia coli (strain K12) GN=ftnB PE=3 SV=1	ftnB	2	55.48	18864.3	1	2	4	NA	1	0	2	0	1	1	110	3	0	0	0	0	1	3	NA	NA	0	2	NA
P31547	D-methionine transport system permease protein metI OS=Escherichia coli (strain K12) GN=metI PE=1 SV=1	metI	2	197.47	23222.8	2	602	349	197	228	301	345	362	475	535	443	407	497	255	221	434	413	478	544	322	144	265	460
P0ABK9	Cytochrome c-552 OS=Escherichia coli (strain K12) GN=nrfA PE=1 SV=1	nrfA	2	83.34	53650.7	2	0	0	0	0	0	0	0	0	0	0	0	0	0	1	2	1	2	0	0	1	1	0
P0AEC0	UPF0053 inner membrane protein yoaE OS=Escherichia coli (strain K12) GN=yoaE PE=1 SV=1	yoaE	2	55.81	56474	2	47	28	29	49	77	71	79	83	75	79	73	58	59	76	84	64	86	57	83	71	73	71
P23878	Ferric enterobactin transport ATP-binding protein FepC OS=Escherichia coli (strain K12) GN=fepC PE=3 SV=2	fepC	2	190.02	29747.5	2	12	6	27	18	11	14	15	18	9	8	6	6	28	42	69	27	36	81	11	16	18	20
P32703	Uncharacterized Na(+)/H(+) exchanger yjcE OS=Escherichia coli (strain K12) GN=yjcE PE=3 SV=1	yjcE	2	83.5	60465.8	2	56	299	403	265	318	82	303	183	450	341	367	336	164	238	541	66	240	274	61	438	166	220
P0A6M2	Disulfide bond formation protein B OS=Escherichia coli (strain K12) GN=dsbB PE=1 SV=1	dsbB	2	81.7	20110.6	2	36	94	74	19	28	33	29	38	77	61	48	37	14	6	24	20	32	34	20	22	34	37
P52644	Heat shock protein hslJ OS=Escherichia coli (strain K12) GN=hslJ PE=1 SV=1	hslJ	2	107.67	15137.6	2	24	94	13	19	9	11	16	51	9	14	10	11	156	74	81	138	149	65	12	20	12	13
P77570	Anhydro-N-acetylmuramic acid kinase OS=Escherichia coli (strain K12) GN=anmK PE=1 SV=1	anmK	2	92.82	39453.4	2	54	61	40	59	66	78	84	71	69	64	68	68	51	51	89	74	81	78	64	54	63	72
P16701	Sulfate transport system permease protein CysT OS=Escherichia coli (strain K12) GN=cysU PE=3 SV=1	cysU	2	232.1	30254.2	2	260	106	134	230	277	196	285	270	398	251	170	139	14	56	401	260	82	182	286	142	183	337
P0AGG4	Thioredoxin-2 OS=Escherichia coli (strain K12) GN=trxC PE=1 SV=1	trxC	2	79.39	15526.7	2	257	393	353	132	172	352	220	218	158	122	95	95	59	152	229	280	285	283	220	129	240	263
P0AC65	Glutaredoxin-like protein nrdH OS=Escherichia coli (strain K12) GN=nrdH PE=1 SV=1	nrdH	2	72.08	9115.53	1	33	6	NA	10	19	29	4	5	13	41	9	3	39	10	1	14	1	NA	NA	7	20	NA
P0AA53	Protein QmcA OS=Escherichia coli (strain K12) GN=qmcA PE=1 SV=1	qmcA	2	131.29	33703.7	2	9	28	14	14	17	37	18	10	38	34	42	43	33	30	13	5	17	13	24	17	25	17
P0AA31	UPF0033 protein yedF OS=Escherichia coli (strain K12) GN=yedF PE=1 SV=1	yedF	2	272.93	8615.38	2	687	1024	4981	1875	3186	2139	2186	1910	3849	4032	3361	2612	165	159	2278	590	470	1358	2796	2322	3519	1992
P0A6S0	Flagellar L-ring protein OS=Escherichia coli (strain K12) GN=flgH PE=3 SV=1	flgH	2	93.42	24582.4	2	0	2	6	0	8	7	14	3	12	15	16	4	1	3	0	1	2	1	3	12	7	0
P07363	Isoform cheA(S) of Chemotaxis protein CheA OS=Escherichia coli (strain K12) GN=cheA	cheA	2	75.66	71320	2	1	3	3	1	2	15	1	0	18	41	16	0	0	0	1	0	1	1	0	0	2	1
P76501	Uncharacterized protein yfcR OS=Escherichia coli (strain K12) GN=yfcR PE=4 SV=1	yfcR	2	56.09	17860.9	1	104	83	NA	40	55	74	43	182	95	134	100	35	16	12	23	67	25	NA	NA	37	55	NA
P0A6B4	Alanine racemase, biosynthetic OS=Escherichia coli (strain K12) GN=alr PE=1 SV=1	alr	2	137.16	39110.2	2	15	15	13	17	7	12	7	13	14	9	9	8	6	6	25	9	26	16	7	8	9	12
P26365	N-acetylmuramoyl-L-alanine amidase AmiB OS=Escherichia coli (strain K12) GN=amiB PE=1 SV=2	amiB	2	125.68	47937.9	2	15	11	10	6	6	7	9	10	5	4	4	2	0	0	8	31	17	9	8	5	6	11
P24228	D-alanyl-D-alanine carboxypeptidase dacB OS=Escherichia coli (strain K12) GN=dacB PE=1 SV=2	dacB	2	45.51	51747.5	2	8	12	6	4	4	5	5	5	5	5	3	2	5	4	5	13	5	6	4	2	6	6
P23930	Apolipoprotein N-acyltransferase OS=Escherichia coli (strain K12) GN=lnt PE=1 SV=1	lnt	2	100.21	57011.2	2	47	71	61	18	29	46	30	29	38	37	32	25	33	21	21	44	62	33	33	21	21	43
P0A6W3	Phospho-N-acetylmuramoyl-pentapeptide-transferase OS=Escherichia coli (strain K12) GN=mraY PE=1 SV=1	mraY	2	63.52	39830.6	2	20	29	17	18	24	23	25	33	34	25	22	19	31	30	18	40	30	24	11	15	10	21
P0A915	Outer membrane protein W OS=Escherichia coli (strain K12) GN=ompW PE=1 SV=1	ompW	2	221.03	22895.3	2	28	183	103	89	74	86	50	55	130	283	309	358	17	13	24	31	27	47	65	36	68	25
P19934	Protein tolA OS=Escherichia coli (strain K12) GN=tolA PE=1 SV=1	tolA	2	145.39	43112.5	2	66	87	66	25	39	54	23	24	27	29	15	18	24	19	37	40	54	41	24	24	23	38
P0ADC3	Lipoprotein-releasing system transmembrane protein lolC OS=Escherichia coli (strain K12) GN=lolC PE=1 SV=1	lolC	2	159.68	43217.9	2	29	48	27	14	18	27	21	37	31	24	23	15	10	28	13	14	25	47	28	9	20	51
P0AEH1	Regulator of sigma E protease OS=Escherichia coli (strain K12) GN=rseP PE=1 SV=1	rseP	2	67.52	49022.4	2	7	14	7	4	6	9	8	8	8	7	6	5	1	1	7	7	3	5	1	2	0	1
P75821	Uncharacterized protein ybjS OS=Escherichia coli (strain K12) GN=ybjS PE=4 SV=2	ybjS	2	106.5	38043.4	2	16	24	15	8	8	8	9	13	11	9	8	9	6	7	7	24	9	13	8	9	10	11
P76373	UDP-glucose 6-dehydrogenase OS=Escherichia coli (strain K12) GN=ugd PE=1 SV=1	ugd	2	45.92	43611.5	1	10	4	NA	6	2	15	5	6	24	2	124	26	0	0	1	15	2	NA	NA	6	23	NA
P76112	Uncharacterized N-acetyltransferase YncA OS=Escherichia coli (strain K12) GN=yncA PE=3 SV=1	mnaT	2	118.04	19217.6	2	76	17	8	49	46	40	56	48	38	26	28	27	38	40	109	78	121	73	56	37	40	67
P0C079	Antitoxin RelB OS=Escherichia coli (strain K12) GN=relB PE=1 SV=1	relB	2	36.21	9047.79	2	178	275	218	98	130	128	147	134	85	75	75	56	20	27	148	60	37	95	138	96	110	173
P0A7Y4	Ribonuclease HI OS=Escherichia coli (strain K12) GN=rnhA PE=1 SV=1	rnhA	2	99.7	17567.8	2	24	36	29	8	9	14	12	14	10	6	7	4	15	17	31	18	24	19	12	8	10	12
P10442	Ribonuclease HII OS=Escherichia coli (strain K12) GN=rnhB PE=1 SV=2	rnhB	2	73.52	21494.4	2	91	213	175	22	33	36	37	30	18	12	6	3	6	1	6	12	1	17	24	13	31	24
P13458	Nuclease sbcCD subunit C OS=Escherichia coli (strain K12) GN=sbcC PE=1 SV=1	sbcC	2	90.8	118631	2	7	10	8	5	12	12	13	11	10	11	9	8	4	15	30	34	16	24	11	9	21	26
P0A8G0	UvrABC system protein C OS=Escherichia coli (strain K12) GN=uvrC PE=1 SV=1	uvrC	2	79.82	68127.4	2	1	2	6	1	1	1	3	1	1	1	1	1	1	4	5	2	7	7	1	2	1	2
P0AEE8	DNA adenine methylase OS=Escherichia coli (strain K12) GN=dam PE=1 SV=1	dam	2	65.09	32061.2	1	74	12	NA	2	0	7	10	3	1	1	8	1	6	2	14	13	13	NA	NA	3	4	NA
P03007	DNA polymerase III subunit epsilon OS=Escherichia coli (strain K12) GN=dnaQ PE=1 SV=1	dnaQ	2	119.96	27063.7	2	15	35	30	13	21	23	13	14	9	8	8	5	0	3	14	28	8	15	15	8	13	15
P28632	DNA polymerase III subunit psi OS=Escherichia coli (strain K12) GN=holD PE=1 SV=1	holD	2	168.57	15146.8	2	26	34	36	6	6	5	0	15	13	6	5	4	35	27	19	7	74	1	36	16	20	23
P17888	Primosomal protein N' OS=Escherichia coli (strain K12) GN=priA PE=1 SV=2	priA	2	79.5	81585.9	1	3	4	NA	0	0	2	2	0	0	0	0	0	0	0	2	3	1	NA	NA	0	0	NA
P0AAZ4	Replication-associated recombination protein A OS=Escherichia coli (strain K12) GN=rarA PE=1 SV=1	rarA	2	63.94	49577.2	2	5	15	7	5	4	8	5	5	5	5	3	6	0	0	1	4	0	1	5	3	5	7
P08394	Exodeoxyribonuclease V beta chain OS=Escherichia coli (strain K12) GN=recB PE=1 SV=1	recB	2	41.27	133857	1	40	31	NA	39	31	49	27	18	34	22	20	29	0	1	41	46	31	NA	NA	25	30	NA
P04993	Exodeoxyribonuclease V alpha chain OS=Escherichia coli (strain K12) GN=recD PE=1 SV=2	recD	2	73.02	66842.7	1	0	1	NA	0	0	0	0	0	0	0	0	0	0	3	0	1	2	NA	NA	0	17	NA
P0A7H0	DNA replication and repair protein recF OS=Escherichia coli (strain K12) GN=recF PE=1 SV=2	recF	2	141.59	40470.8	1	34	20	NA	6	12	10	7	6	7	16	1	5	6	3	4	14	1	NA	NA	3	7	NA
P45771	Uncharacterized protein yrdD OS=Escherichia coli (strain K12) GN=yrdD PE=4 SV=2	yrdD	2	63.81	19839.7	2	3	3	6	3	3	5	3	4	4	4	3	3	0	0	6	0	3	4	3	4	6	3
P05824	DNA repair protein recN OS=Escherichia coli (strain K12) GN=recN PE=1 SV=2	recN	2	98.23	61340.1	1	0	10	NA	0	0	0	0	0	0	0	0	0	0	0	0	1	0	NA	NA	0	0	NA
P30014	Ribonuclease T OS=Escherichia coli (strain K12) GN=rnt PE=1 SV=1	rnt	2	169.1	23489.6	2	237	377	165	96	83	100	100	87	85	57	46	34	88	62	185	113	157	153	93	75	93	94
P0ADX9	Ribosomal RNA small subunit methyltransferase D OS=Escherichia coli (strain K12) GN=rsmD PE=1 SV=1	rsmD	2	58.23	21646.2	2	50	75	59	27	37	42	39	46	33	26	18	18	23	38	45	55	65	42	26	27	33	40
P09184	Very short patch repair protein OS=Escherichia coli (strain K12) GN=vsr PE=1 SV=3	vsr	2	77.43	17986.2	1	13	9	NA	2	21	11	13	18	2	2	0	1	2	4	3	3	9	NA	NA	3	2	NA
P0AFC0	Dihydroneopterin triphosphate pyrophosphatase OS=Escherichia coli (strain K12) GN=nudB PE=1 SV=1	nudB	2	92.9	17276.9	1	9	34	NA	7	15	11	6	6	3	9	0	1	4	1	5	5	7	NA	NA	4	7	NA
P0ACL0	Glycerol-3-phosphate regulon repressor OS=Escherichia coli (strain K12) GN=glpR PE=1 SV=1	glpR	2	86.36	28012.4	2	75	145	109	51	64	60	90	68	60	53	57	48	65	43	58	142	59	96	92	81	90	123
P0ACN7	HTH-type transcriptional repressor CytR OS=Escherichia coli (strain K12) GN=cytR PE=1 SV=1	cytR	2	50.86	37777.3	2	9	22	7	5	9	6	6	7	5	5	5	9	4	1	2	8	1	3	4	12	4	3
P06846	HTH-type transcriptional regulator ebgR OS=Escherichia coli (strain K12) GN=ebgR PE=4 SV=2	ebgR	2	96.38	36169.9	2	24	31	30	12	18	14	14	13	15	8	6	5	4	6	13	15	11	10	10	6	10	6
P0ACL2	Exu regulon transcriptional regulator OS=Escherichia coli (strain K12) GN=exuR PE=4 SV=1	exuR	2	126.3	29798.9	2	44	94	65	40	53	63	53	44	50	49	41	43	2	4	18	9	38	71	64	46	57	70
P0AEM6	RNA polymerase sigma factor for flagellar operon OS=Escherichia coli (strain K12) GN=fliA PE=3 SV=1	fliA	2	109.88	27486.3	2	1	3	6	1	4	6	6	2	6	10	5	2	1	1	2	3	1	1	3	3	10	2
P25748	HTH-type transcriptional regulator galS OS=Escherichia coli (strain K12) GN=galS PE=1 SV=2	galS	2	71.15	37315	2	0	0	0	0	0	0	0	0	0	0	0	0	0	0	0	0	0	0	0	3	0	0
P0A9F6	Glycine cleavage system transcriptional activator OS=Escherichia coli (strain K12) GN=gcvA PE=1 SV=1	gcvA	2	92.2	34362.1	2	5	4	7	4	8	10	7	7	15	14	14	15	4	4	3	10	9	9	10	7	7	7
P16528	Acetate operon repressor OS=Escherichia coli (strain K12) GN=iclR PE=1 SV=1	iclR	2	80.03	29702.4	2	7	14	5	1	10	5	8	11	8	2	3	1	1	1	1	3	5	2	3	5	4	4
P0A9F9	HTH-type transcriptional regulator metR OS=Escherichia coli (strain K12) GN=metR PE=4 SV=1	metR	2	91.34	35588.6	2	45	38	56	83	76	31	28	46	41	40	36	42	2	3	24	29	34	50	49	47	48	42
P0AFW8	Protein rof OS=Escherichia coli (strain K12) GN=rof PE=1 SV=1	rof	2	60.34	9455.67	2	738	902	679	434	516	818	695	622	465	400	346	258	693	510	1231	1436	1650	749	513	436	488	722
P30864	Uncharacterized HTH-type transcriptional regulator yafC OS=Escherichia coli (strain K12) GN=yafC PE=1 SV=1	yafC	2	49	33736.6	2	8	18	9	10	7	8	6	8	10	9	8	9	6	5	7	12	10	7	6	7	8	8
P37671	HTH-type transcriptional regulator yiaJ OS=Escherichia coli (strain K12) GN=yiaJ PE=1 SV=1	yiaJ	2	92.26	31028.8	2	91	51	54	69	67	72	70	48	86	51	45	39	8	19	68	65	67	84	72	45	55	70
P31475	Uncharacterized HTH-type transcriptional regulator yieP OS=Escherichia coli (strain K12) GN=yieP PE=4 SV=3	yieP	2	154.1	26041.3	2	158	261	162	89	74	105	86	105	76	72	59	44	58	53	159	108	116	98	86	54	66	105
P0ACK5	Deoxyribose operon repressor OS=Escherichia coli (strain K12) GN=deoR PE=1 SV=1	deoR	2	71.72	28511.6	2	26	34	29	23	28	36	34	31	45	35	42	36	12	14	25	44	24	30	30	16	35	49
P0ACK8	L-fucose operon activator OS=Escherichia coli (strain K12) GN=fucR PE=4 SV=1	fucR	2	64.53	27327.2	2	7	113	92	15	45	35	34	27	24	45	19	18	9	0	1	1	1	1	7	5	11	4
P15082	Glucitol operon repressor OS=Escherichia coli (strain K12) GN=srlR PE=2 SV=1	srlR	2	39.05	28200.4	2	12	11	9	8	22	3	22	21	21	20	20	6	6	5	5	11	9	7	5	4	4	4
P77721	Uncharacterized HTH-type transcriptional regulator ydjF OS=Escherichia coli (strain K12) GN=ydjF PE=1 SV=1	ydjF	2	117.19	28225.7	2	23	68	32	30	29	29	21	38	23	29	27	31	9	13	10	17	7	20	28	18	30	24
P37338	HTH-type transcriptional repressor CsiR OS=Escherichia coli (strain K12) GN=csiR PE=1 SV=2	csiR	2	97.91	24956.9	1	6	0	NA	4	7	2	5	2	2	5	0	1	0	1	1	3	1	NA	NA	4	2	NA
P45544	HTH-type transcriptional regulator frlR OS=Escherichia coli (strain K12) GN=frlR PE=1 SV=2	frlR	2	63.17	27785.3	2	11	29	17	14	17	14	19	19	14	14	11	10	5	7	23	17	9	21	16	22	28	28
P67430	HTH-type transcriptional repressor nemR OS=Escherichia coli (strain K12) GN=nemR PE=1 SV=1	nemR	2	66.26	22243.1	1	3	22	NA	0	1	4	4	0	1	1	1	0	0	1	0	6	0	NA	NA	1	3	NA
P0AF63	HTH-type transcriptional repressor nsrR OS=Escherichia coli (strain K12) GN=nsrR PE=1 SV=1	nsrR	2	129.15	15565.1	1	872	136	NA	35	77	59	51	25	46	39	77	30	107	36	42	138	67	NA	NA	28	48	NA
P0A9U6	HTH-type transcriptional regulator puuR OS=Escherichia coli (strain K12) GN=puuR PE=1 SV=1	puuR	2	69.89	20061.2	2	111	149	170	70	120	201	90	79	153	223	133	79	21	11	119	115	84	158	214	89	121	203
P0ACI3	Xylose operon regulatory protein OS=Escherichia coli (strain K12) GN=xylR PE=4 SV=1	xylR	2	78.79	44823.1	2	1	8	4	0	1	1	1	2	0	1	1	2	0	1	0	1	1	57	0	1	1	0
P0ACM2	Uncharacterized HTH-type transcriptional regulator ydfH OS=Escherichia coli (strain K12) GN=ydfH PE=1 SV=1	ydfH	2	92.61	26530.5	1	96	154	NA	43	50	52	54	44	84	43	50	57	31	6	88	75	109	NA	NA	34	60	NA
P37344	Psp operon transcriptional activator OS=Escherichia coli (strain K12) GN=pspF PE=1 SV=2	pspF	2	84.39	36945.2	2	22	17	14	12	17	15	15	19	15	15	13	12	12	10	12	19	17	17	19	12	18	17
P0A9V5	Uncharacterized HTH-type transcriptional regulator yiaG OS=Escherichia coli (strain K12) GN=yiaG PE=4 SV=1	yiaG	2	74.39	11007.8	1	4	14	NA	1	2	8	6	0	2	0	2	1	10	2	2	10	14	NA	NA	0	1	NA
P39356	Uncharacterized transcriptional regulator yjhU OS=Escherichia coli (strain K12) GN=yjhU PE=3 SV=2	yjhU	2	115.88	36070.7	2	7	15	22	3	9	14	10	7	23	18	17	16	8	7	5	3	9	15	16	11	13	22
P77559	Uncharacterized HTH-type transcriptional regulator ynfL OS=Escherichia coli (strain K12) GN=ynfL PE=4 SV=1	ynfL	2	51.9	33242.4	1	3	40	NA	15	5	50	3	38	1	82	11	23	4	3	10	2	4	NA	NA	9	39	NA
Q46855	Uncharacterized HTH-type transcriptional regulator yqhC OS=Escherichia coli (strain K12) GN=yqhC PE=4 SV=2	yqhC	2	63.95	35915.5	1	56	1	NA	0	8	1	0	0	0	1	1	1	0	1	6	4	6	NA	NA	0	1	NA
P0A9W6	Uncharacterized protein YrbA OS=Escherichia coli (strain K12) GN=yrbA PE=1 SV=1	yrbA	2	71.44	9427.72	2	499	606	708	197	283	250	282	256	192	109	173	128	19	66	272	235	349	206	162	200	230	305
P75959	N-acetyl-D-glucosamine kinase OS=Escherichia coli (strain K12) GN=nagK PE=1 SV=1	nagK	2	105.75	33003.6	2	9	19	13	5	8	7	9	10	5	5	4	4	4	4	8	5	7	8	7	5	8	8
P0A6R3	DNA-binding protein fis OS=Escherichia coli (strain K12) GN=fis PE=1 SV=1	fis	2	162.51	11214.8	2	3523	11961	5565	1000	1643	1722	1664	935	1592	956	557	326	43	81	2178	3139	1392	1787	1528	648	1849	2436
P0A7Y8	Ribonuclease P protein component OS=Escherichia coli (strain K12) GN=rnpA PE=3 SV=1	rnpA	2	125.88	13762.7	2	130	310	173	83	87	120	94	62	128	95	63	67	28	16	44	65	53	64	45	21	61	76
P0CG19	Inactive ribonuclease PH OS=Escherichia coli (strain K12) GN=rph PE=3 SV=1	rph	2	126.53	24391.5	2	5	113	84	12	14	5	12	4	33	14	9	4	45	1	18	9	2	7	9	14	11	8
P0A7P5	50S ribosomal protein L34 OS=Escherichia coli (strain K12) GN=rpmH PE=1 SV=1	rpmH	2	67.22	5359.07	2	14566	34664	24717	5055	8509	9281	9253	7767	9819	6853	5216	4802	4234	5731	12598	16760	13839	10309	9562	6040	10116	13964
P0A937	Small protein A OS=Escherichia coli (strain K12) GN=smpA PE=1 SV=1	bamE	2	143.59	12276.2	2	2725	2987	2741	1570	2390	2712	2415	2422	1972	1919	1652	1576	2656	2302	4469	3887	5229	3217	2254	1656	2228	3025
P0ACG8	Heat shock protein 15 OS=Escherichia coli (strain K12) GN=hslR PE=1 SV=1	hslR	2	53.56	15468.3	2	17	67	16	33	49	52	81	39	50	32	64	38	161	115	332	320	319	343	249	259	281	391
P39380	RNA 2'-phosphotransferase OS=Escherichia coli (strain K12) GN=kptA PE=3 SV=2	kptA	2	61.16	20498.8	1	2	0	NA	0	0	0	1	0	0	0	0	5	0	0	1	3	0	NA	NA	0	0	NA
P0A8N7	Uncharacterized protein YjeA OS=Escherichia coli (strain K12) GN=poxA PE=1 SV=1	poxA	2	106.53	36934.4	1	35	259	NA	12	20	19	23	10	23	20	11	1	25	81	31	36	43	NA	NA	8	17	NA
P32684	Ribosomal large subunit pseudouridine synthase F OS=Escherichia coli (strain K12) GN=rluF PE=1 SV=1	rluF	2	118.39	32438.4	2	16	11	14	2	2	3	5	4	5	3	3	1	2	1	3	5	3	5	4	2	3	9
P0A7N1	50S ribosomal protein L31 type B OS=Escherichia coli (strain K12) GN=rpmE2 PE=1 SV=1	rpmE	2	138.77	9896.06	1	3	17	NA	1	3	0	1	2	2	17	7	1	6	26	2	1	1	NA	NA	1	1	NA
P0AGK4	RNA-binding protein YhbY OS=Escherichia coli (strain K12) GN=yhbY PE=1 SV=1	yhbY	2	74.31	10759	2	281	620	401	148	246	448	338	271	359	230	235	234	539	311	317	366	692	262	174	289	285	351
P46854	Uncharacterized N-acetyltransferase YhhY OS=Escherichia coli (strain K12) GN=yhhY PE=3 SV=1	yhhY	2	88.62	18763.4	1	6	6	NA	2	2	7	1	4	11	9	2	0	0	0	21	3	3	NA	NA	2	7	NA
P39332	RutC family protein yjgH OS=Escherichia coli (strain K12) GN=yjgH PE=1 SV=1	yjgH	2	84.62	14563.1	1	15	5	NA	10	2	4	2	2	3	10	0	3	11	2	3	29	2	NA	NA	3	5	NA
P33224	Putative acyl-CoA dehydrogenase AidB OS=Escherichia coli (strain K12) GN=aidB PE=1 SV=3	aidB	2	179.51	60532.8	2	3	10	13	17	5	11	5	3	11	12	23	32	88	88	9	16	155	7	7	16	8	3
Q46822	Isopentenyl-diphosphate Delta-isomerase OS=Escherichia coli (strain K12) GN=idi PE=1 SV=1	idi	2	106.9	20477.2	2	17	32	28	34	22	13	19	10	28	29	44	47	35	41	33	24	32	8	12	62	16	16
P27247	Phosphate acyltransferase OS=Escherichia coli (strain K12) GN=plsX PE=1 SV=2	plsX	2	164.32	38172.5	2	51	72	52	58	53	56	41	48	39	43	42	45	16	11	21	23	26	30	27	61	30	18
P33368	Uncharacterized oxidoreductase yohF OS=Escherichia coli (strain K12) GN=yohF PE=3 SV=2	yohF	2	88.94	26915.8	2	72	49	40	76	67	87	61	35	34	55	96	148	93	99	74	23	64	13	45	65	41	27
P76407	Lipid kinase YegS OS=Escherichia coli (strain K12) GN=yegS PE=1 SV=1	yegS	2	107.37	32000.3	2	42	41	45	99	88	77	69	46	66	72	86	95	148	145	116	46	184	79	68	82	56	48
P0A9V8	Uncharacterized oxidoreductase yihU OS=Escherichia coli (strain K12) GN=yihU PE=3 SV=1	yihU	2	72.66	31120	1	6	3	NA	2	1	4	14	3	5	4	1	1	0	0	0	1	0	NA	NA	1	2	NA
P31119	Bifunctional protein aas OS=Escherichia coli (strain K12) GN=aas PE=1 SV=2	aas	2	82.59	80630.6	2	6	12	10	6	7	8	7	7	10	13	12	9	2	3	4	6	6	8	5	3	5	8
P0A6E9	Putative dethiobiotin synthetase OS=Escherichia coli (strain K12) GN=ynfK PE=3 SV=1	bioD	2	152.18	24947.4	2	4	11	6	2	4	8	4	3	5	5	4	5	16	12	3	25	5	4	9	9	10	8
P29680	Uroporphyrinogen decarboxylase OS=Escherichia coli (strain K12) GN=hemE PE=1 SV=3	hemE	2	119.34	39204.9	2	31	10	22	4	9	9	12	12	9	7	2	4	6	7	2	15	15	13	9	10	9	12
P23871	Ferrochelatase OS=Escherichia coli (strain K12) GN=hemH PE=1 SV=3	hemH	2	141.81	35843.3	2	19	61	31	8	8	24	9	7	7	5	5	2	13	7	7	4	0	4	4	7	7	5
P0A752	Nicotinate-nucleotide adenylyltransferase OS=Escherichia coli (strain K12) GN=nadD PE=1 SV=1	nadD	2	109.22	24494.6	2	40	67	42	25	31	23	27	22	20	17	14	13	4	26	47	48	56	51	35	30	30	48
P0AFK2	Nicotinamide riboside transporter pnuC OS=Escherichia coli (strain K12) GN=pnuC PE=1 SV=1	pnuC	2	52.96	26960.3	2	60	27	65	30	27	48	35	43	61	51	61	56	94	73	50	95	63	39	46	36	31	52
P0AGG0	Thiamine-monophosphate kinase OS=Escherichia coli (strain K12) GN=thiL PE=3 SV=1	thiL	2	121.85	35030.7	2	103	171	155	78	62	78	82	82	60	54	51	40	66	71	117	117	106	80	70	67	61	52
P0A6I6	Phosphopantetheine adenylyltransferase OS=Escherichia coli (strain K12) GN=coaD PE=1 SV=1	coaD	2	69.78	17807.1	2	62	64	56	30	35	41	58	39	41	27	26	33	42	33	56	97	74	48	57	55	61	56
P26281	2-amino-4-hydroxy-6-hydroxymethyldihydropteridine pyrophosphokinase OS=Escherichia coli (strain K12) GN=folK PE=1 SV=3	folK	2	193.15	18049.4	1	214	379	NA	160	228	254	168	188	302	281	244	180	182	162	183	224	236	NA	NA	132	179	NA
P65870	6-carboxy-5,6,7,8-tetrahydropterin synthase OS=Escherichia coli (strain K12) GN=queD PE=1 SV=1	queD	2	79.79	13745.9	2	283	593	230	76	179	205	211	177	128	91	81	55	151	118	199	279	208	164	148	157	201	264
P76423	Hydroxyethylthiazole kinase OS=Escherichia coli (strain K12) GN=thiM PE=3 SV=1	thiM	2	105.6	27303.7	1	3	108	NA	3	6	6	3	2	2	3	0	1	0	0	1	1	2	NA	NA	1	2	NA
P25534	2-octaprenyl-6-methoxyphenol hydroxylase OS=Escherichia coli (strain K12) GN=ubiH PE=1 SV=2	ubiH	2	58.66	42243.6	1	63	114	NA	39	54	70	49	56	56	45	28	16	6	6	62	73	68	NA	NA	30	61	NA
P0A731	Methylglyoxal synthase OS=Escherichia coli (strain K12) GN=mgsA PE=1 SV=1	mgsA	2	289.97	16889.7	2	869	2254	2254	1187	1382	1634	1559	1573	1297	1292	1045	919	559	359	586	528	700	456	651	542	901	621
P37351	Ribose-5-phosphate isomerase B OS=Escherichia coli (strain K12) GN=rpiB PE=1 SV=2	rpiB	2	101.64	16045.3	2	35	74	68	20	39	64	40	32	49	37	34	28	15	6	27	29	13	19	71	31	28	14
P56580	Glucitol/sorbitol-specific phosphotransferase enzyme IIB component OS=Escherichia coli (strain K12) GN=srlE PE=1 SV=1	srlE	2	123.5	33292.8	2	0	185	4	1	0	2	0	1	0	0	0	0	0	1	0	0	0	0	0	0	0	0
P05804	Beta-glucuronidase OS=Escherichia coli (strain K12) GN=uidA PE=1 SV=2	uidA	2	58.88	68385.7	2	1	6	1	1	1	1	1	1	1	4	7	12	3	4	7	6	2	2	1	1	1	2
Q6BF16	2-dehydro-3-deoxy-6-phosphogalactonate aldolase OS=Escherichia coli (strain K12) GN=dgoA PE=1 SV=1	dgoA	2	114.35	21359.1	2	0	0	0	0	0	0	0	0	0	0	0	0	0	0	0	0	0	0	0	81	0	0
P31459	2-dehydro-3-deoxygalactonokinase OS=Escherichia coli (strain K12) GN=dgoK PE=4 SV=1	dgoK	2	70.6	31335.7	1	12	5	NA	8	1	9	7	17	8	21	3	7	1	8	9	12	7	NA	NA	35	7	NA
P78055	Fructose-6-phosphate aldolase 1 OS=Escherichia coli (strain K12) GN=fsaA PE=1 SV=2	fsaA	2	80.56	22964.2	2	110	84	100	67	75	115	118	89	64	55	58	40	91	86	299	181	139	141	96	137	96	85
P0AB87	L-fuculose phosphate aldolase OS=Escherichia coli (strain K12) GN=fucA PE=1 SV=1	fucA	2	86.07	23742.2	1	1	13	NA	0	21	1	29	1	0	7	1	1	1	0	3	1	0	NA	NA	4	7	NA
P30147	Hydroxypyruvate isomerase OS=Escherichia coli (strain K12) GN=hyi PE=1 SV=1	hyi	2	65.59	29340.4	1	6	0	NA	0	0	3	0	0	1	2	5	2	2	3	1	4	4	NA	NA	0	0	NA
P77257	Autoinducer 2 import ATP-binding protein LsrA OS=Escherichia coli (strain K12) GN=lsrA PE=1 SV=1	lsrA	2	80.7	55768.5	2	0	1	0	0	2	0	0	0	0	1	1	22	2	1	0	0	0	0	1	1	0	0
P02916	Maltose transport system permease protein malF OS=Escherichia coli (strain K12) GN=malF PE=1 SV=1	malF	2	113.19	56958.6	2	1	6	3	1	3	3	2	4	29	54	56	30	0	0	0	1	2	0	7	2	2	4
P69801	Mannose permease IIC component OS=Escherichia coli (strain K12) GN=manY PE=1 SV=1	manY	2	80.82	27599.7	2	110	139	80	48	84	280	119	86	688	426	294	245	41	38	60	112	54	115	139	77	92	246
P0AEY8	Multidrug transporter MdfA OS=Escherichia coli (strain K12) GN=mdfA PE=1 SV=1	mdfA	2	46.88	44273.8	1	17	177	NA	3	2	20	2	0	8	1	6	23	9	60	5	3	1	NA	NA	3	14	NA
P23200	Galactoside transport system permease protein mglC OS=Escherichia coli (strain K12) GN=mglC PE=1 SV=1	mglC	2	89.65	35509.2	2	1	34	21	8	14	13	10	12	35	26	32	20	0	0	1	1	0	2	25	53	15	5
P75906	Poly-beta-1,6-N-acetyl-D-glucosamine N-deacetylase OS=Escherichia coli (strain K12) GN=pgaB PE=1 SV=1	pgaB	2	34.07	77346.2	2	2	1	1	4	2	4	4	2	11	8	6	3	0	0	5	0	7	7	1	2	2	6
P0AGI1	Ribose transport system permease protein rbsC OS=Escherichia coli (strain K12) GN=rbsC PE=1 SV=1	rbsC	2	123.54	33412.4	2	6	25	19	22	29	24	23	54	44	62	69	82	11	8	9	17	7	13	44	42	37	37
P36672	PTS system trehalose-specific EIIBC component OS=Escherichia coli (strain K12) GN=treB PE=1 SV=4	treB	2	111.16	51029.3	2	15	293	53	14	23	19	22	24	28	43	80	88	7	15	15	23	7	13	22	38	25	22
P76350	Shikimate transporter OS=Escherichia coli (strain K12) GN=shiA PE=3 SV=1	shiA	2	76.26	47767.9	2	34	5	6	2	13	15	16	7	15	12	15	7	0	0	17	2	8	21	14	11	12	18
P69822	Ascorbate-specific phosphotransferase enzyme IIB component OS=Escherichia coli (strain K12) GN=ulaB PE=1 SV=1	ulaB	2	73.25	10870.5	1	28	47	NA	27	54	25	22	11	39	39	26	35	111	115	25	41	13	NA	NA	15	19	NA
P0AGI4	Xylose transport system permease protein xylH OS=Escherichia coli (strain K12) GN=xylH PE=1 SV=1	xylH	2	127.25	40986	2	0	0	0	0	0	0	4	1	0	0	0	0	0	5	2	9	3	105	7	1	20	13
P45424	Uncharacterized protein yhcH OS=Escherichia coli (strain K12) GN=yhcH PE=1 SV=1	yhcH	2	156.89	17008.5	1	129	1057	NA	105	104	162	105	175	161	304	337	249	262	227	117	105	139	NA	NA	84	96	NA
P39363	Putative phosphotransferase IIA component sgcA OS=Escherichia coli (strain K12) GN=sgcA PE=3 SV=1	sgcA	2	141.69	15610	1	9	38	NA	11	31	22	13	11	4	91	3	106	85	17	16	16	8	NA	NA	16	28	NA
P15723	Deoxyguanosinetriphosphate triphosphohydrolase OS=Escherichia coli (strain K12) GN=dgt PE=1 SV=4	dgt	2	55.74	59327.5	2	2	3	2	3	3	3	3	4	3	4	3	3	1	1	2	2	2	2	4	5	3	2
P23331	Thymidine kinase OS=Escherichia coli (strain K12) GN=tdk PE=3 SV=1	tdk	2	162.02	23423.7	2	92	145	121	41	45	64	51	54	46	31	18	16	103	2	67	7	78	51	39	17	41	60
P08337	Mutator mutT protein OS=Escherichia coli (strain K12) GN=mutT PE=1 SV=1	mutT	2	78.35	14899.6	1	4	1	NA	0	3	3	1	21	4	6	18	0	0	1	0	19	1	NA	NA	0	3	NA
P77554	Uncharacterized protein yahJ OS=Escherichia coli (strain K12) GN=yahJ PE=4 SV=1	yahJ	2	79.98	50498.8	2	2	8	4	8	5	5	9	8	7	10	8	7	6	7	15	15	15	12	13	14	10	9
P0AEI6	Phosphatase nudJ OS=Escherichia coli (strain K12) GN=nudJ PE=1 SV=1	nudJ	2	105.2	17403.6	2	46	31	56	11	47	50	31	11	15	9	9	7	41	36	48	31	56	28	14	15	14	29
Q46925	Cysteine sulfinate desulfinase OS=Escherichia coli (strain K12) GN=csdA PE=1 SV=1	csdA	2	97.28	43189	2	12	25	9	2	6	4	4	3	2	2	3	4	3	3	21	4	13	9	5	5	5	5
P69908	Glutamate decarboxylase alpha OS=Escherichia coli (strain K12) GN=gadA PE=1 SV=1	gadA	2	1246.47	52633.1	2	25	28	22	25	16	16	12	10	11	11	12	17	336	320	19	20	161	11	11	13	14	14
P0A6T9	Glycine cleavage system H protein OS=Escherichia coli (strain K12) GN=gcvH PE=1 SV=2	gcvH	2	45.52	13784.6	2	648	1085	1337	320	443	401	513	399	424	265	180	187	233	404	513	826	535	589	478	274	413	583
P0AC55	Nitrogen regulatory protein P-II 2 OS=Escherichia coli (strain K12) GN=glnK PE=1 SV=1	glnK	2	97.77	12233.7	2	58	3	2	1	1	6	16	7	4	0	26	73	114	119	63	37	416	23	27	29	1	112
P24555	Protease 2 OS=Escherichia coli (strain K12) GN=ptrB PE=1 SV=2	ptrB	2	24.77	79422.3	2	0	5	3	2	1	1	0	1	2	2	2	1	4	1	2	7	5	6	12	10	10	7
P16095	L-serine dehydratase 1 OS=Escherichia coli (strain K12) GN=sdaA PE=1 SV=3	sdaA	2	188.3	48857.1	2	4	90	52	3	2	1	2	2	2	1	1	1	0	0	0	1	0	1	1	0	1	1
P23173	Low affinity tryptophan permease OS=Escherichia coli (strain K12) GN=tnaB PE=1 SV=1	tnaB	2	117.68	45163.1	2	10	365	253	4	5	4	4	3	14	27	41	63	9	1	1	1	2	5	2	1	1	2
P52096	Uncharacterized protein yaeR OS=Escherichia coli (strain K12) GN=yaeR PE=4 SV=1	yaeR	2	115.76	14709.3	2	136	109	116	141	113	154	132	94	128	135	160	128	129	275	328	91	329	206	214	316	178	268
P05041	Para-aminobenzoate synthase component 1 OS=Escherichia coli (strain K12) GN=pabB PE=1 SV=1	pabB	2	70.11	50919.6	2	36	45	39	12	16	20	18	15	14	11	7	6	11	10	51	46	32	37	17	10	17	23
[truncated: 432 more rows]

## Sheet: Reaction-Protein mapping
Reaction ID (from Gerosa et. al.)	Gene name (from Schmidt et. al.)	Uniprot Accession	Comments	Formula	Links
[truncated: 14 more rows]

[truncated: 4 more sheets: Flux per enzyme, Reaction saturation, Allosteric regulation, Non autcatalytic cycles reactio]
